# Supplementary material for: Quercetin Induces Apoptosis via Downregulation of Vascular Endothelial Growth Factor/Akt Signaling Pathway in Acute Myeloid Leukemia Cells
Source: Front Pharmacol. 2020 Dec 10;11:534171. doi: 10.3389/fphar.2020.534171 (PMC7758733; doi:10.3389/fphar.2020.534171)
Supplement: Supplementary file 3 [file datasheet3.xlsx]

## Sheet: 12-hr quercetin treatment 
Specific Qercetin targets identified using ICABPP approach after 12-hr quercetin treatment. All the proteins listed below were identified and quantified by at least two peptides. These proteins were all enriched two times by the quercetin probe compared to DMSO‐treated control.
N	Unused	Total	% Cov	Accession #	Name	Species	Peptides(95%)	115:113	116:113	115:114	116:114
4843	0.06	0.25	20.1	sp|Q9BR39|JPH2_HUMAN	Junctophilin-2 OS=Homo sapiens GN=JPH2 PE=1 SV=2	HUMAN	1	0.01	0.6754	0.01	0.1326
2992	2.5	4.83	28.5	sp|Q8IWA4|MFN1_HUMAN	Mitofusin-1 OS=Homo sapiens GN=MFN1 PE=1 SV=2	HUMAN	3	0.01	0.9914	0.01	0.1532
4956	0.05	0.2	10.4	sp|Q96EP1|CHFR_HUMAN	E3 ubiquitin-protein ligase CHFR OS=Homo sapiens GN=CHFR PE=1 SV=2	HUMAN	0	0.01	5.0455	0.01	0.1537
3366	2.01	2.61	24.7	sp|Q8N1G0|ZN687_HUMAN	Zinc finger protein 687 OS=Homo sapiens GN=ZNF687 PE=1 SV=1	HUMAN	1	0.01	2.2084	0.01	0.1611
4706	0.08	0.29	34.6	RRRRRsp|O60763|USO1_HUMAN	REVERSED General vesicular transport factor p115 OS=Homo sapiens GN=USO1 PE=1 SV=2	HUMAN	0	0.0587	0.8649	0.1586	0.1784
2987	2.53	2.7	31.7	sp|Q8TCF1|ZFAN1_HUMAN	AN1-type zinc finger protein 1 OS=Homo sapiens GN=ZFAND1 PE=1 SV=1	HUMAN	3	0.1306	1.2606	0.0492	0.1878
3727	2	2.01	12.1	sp|Q9BTE1|DCTN5_HUMAN	Dynactin subunit 5 OS=Homo sapiens GN=DCTN5 PE=1 SV=1	HUMAN	1	0.1442	0.6576	0.2744	0.2352
4912	0.05	0.7	38.9	RRRRRsp|Q8TDY2|RBCC1_HUMAN	REVERSED RB1-inducible coiled-coil protein 1 OS=Homo sapiens GN=RB1CC1 PE=1 SV=3	HUMAN	1	0.1643	1.3529	0.2429	0.2477
4687	0.09	0.09	21.4	sp|O14957|QCR10_HUMAN	Cytochrome b-c1 complex subunit 10 OS=Homo sapiens GN=UQCR11 PE=2 SV=1	HUMAN	1	0.1763	1.4544	0.4158	0.2523
4477	0.15	0.29	13.1	sp|Q04864|REL_HUMAN	Proto-oncogene c-Rel OS=Homo sapiens GN=REL PE=1 SV=1	HUMAN	0	0.2343	0.4435	0.4378	0.2534
3896	1.41	1.61	33	RRRRRsp|Q9BZL4|PP12C_HUMAN	REVERSED Protein phosphatase 1 regulatory subunit 12C OS=Homo sapiens GN=PPP1R12C PE=1 SV=1	HUMAN	1	0.235	1.2619	0.2529	0.2713
4516	0.13	13.3	38.4	sp|Q9BYX7|ACTBM_HUMAN	Putative beta-actin-like protein 3 OS=Homo sapiens GN=POTEKP PE=5 SV=1	HUMAN	33	0.2513	0.9243	0.0511	0.2763
5003	0.05	0.05	18.2	sp|Q96DE5|APC16_HUMAN	Anaphase-promoting complex subunit 16 OS=Homo sapiens GN=ANAPC16 PE=1 SV=1	HUMAN	0	0.2627	0.5989	0.6856	0.2782
3392	2.01	2.27	47.6	sp|Q15554|TERF2_HUMAN	Telomeric repeat-binding factor 2 OS=Homo sapiens GN=TERF2 PE=1 SV=2	HUMAN	1	0.2804	0.7809	0.6652	0.2792
3112	2.2	2.38	23.1	sp|Q7Z591|AKNA_HUMAN	AT-hook-containing transcription factor OS=Homo sapiens GN=AKNA PE=1 SV=2	HUMAN	1	0.2903	1.3406	0.4307	0.2943
2613	4	4.08	29.6	sp|Q01581|HMCS1_HUMAN	Hydroxymethylglutaryl-CoA synthase, cytoplasmic OS=Homo sapiens GN=HMGCS1 PE=1 SV=2	HUMAN	2	0.2932	0.2999	0.3766	0.3226
3515	2	2.33	37.6	sp|Q15025|TNIP1_HUMAN	TNFAIP3-interacting protein 1 OS=Homo sapiens GN=TNIP1 PE=1 SV=2	HUMAN	1	0.2936	0.9124	0.83	0.3298
4665	0.09	0.28	28.4	sp|Q8TEA1|NSUN6_HUMAN	Putative methyltransferase NSUN6 OS=Homo sapiens GN=NSUN6 PE=1 SV=1	HUMAN	0	0.2948	0.6117	0.2483	0.3349
4199	0.47	0.48	14.6	sp|O75446|SAP30_HUMAN	Histone deacetylase complex subunit SAP30 OS=Homo sapiens GN=SAP30 PE=1 SV=1	HUMAN	1	0.3028	0.5934	0.4653	0.3491
3847	1.62	1.63	55.9	sp|Q15004|PAF15_HUMAN	PCNA-associated factor OS=Homo sapiens GN=KIAA0101 PE=1 SV=1	HUMAN	1	0.3036	0.5857	0.3648	0.3499
4398	0.2	0.37	22.5	sp|Q96N67|DOCK7_HUMAN	Dedicator of cytokinesis protein 7 OS=Homo sapiens GN=DOCK7 PE=1 SV=4	HUMAN	1	0.3058	0.572	0.382	0.3519
3337	2.02	2.04	10.7	sp|Q8TB52|FBX30_HUMAN	F-box only protein 30 OS=Homo sapiens GN=FBXO30 PE=1 SV=3	HUMAN	1	0.3142	0.4553	0.7465	0.3686
4235	0.39	0.83	26.2	sp|P54274|TERF1_HUMAN	Telomeric repeat-binding factor 1 OS=Homo sapiens GN=TERF1 PE=1 SV=3	HUMAN	1	0.3182	1.1328	0.4394	0.3701
3188	2.09	2.57	27.1	sp|Q96HW7|INT4_HUMAN	Integrator complex subunit 4 OS=Homo sapiens GN=INTS4 PE=1 SV=2	HUMAN	1	0.3389	0.994	0.3656	0.3748
3218	2.06	3.4	43.5	sp|O14777|NDC80_HUMAN	Kinetochore protein NDC80 homolog OS=Homo sapiens GN=NDC80 PE=1 SV=1	HUMAN	3	0.3395	0.4629	1.1521	0.3841
3583	2	2.12	27.6	sp|Q6PJI9|WDR59_HUMAN	WD repeat-containing protein 59 OS=Homo sapiens GN=WDR59 PE=1 SV=2	HUMAN	1	0.3423	1.1358	1.0705	0.3853
3988	1.03	1.08	34.6	sp|P48723|HSP13_HUMAN	Heat shock 70 kDa protein 13 OS=Homo sapiens GN=HSPA13 PE=1 SV=1	HUMAN	1	0.3695	0.7959	0.3411	0.3877
4295	0.31	0.37	26.9	sp|Q9P270|SLAI2_HUMAN	SLAIN motif-containing protein 2 OS=Homo sapiens GN=SLAIN2 PE=1 SV=2	HUMAN	0	0.3696	0.4397	0.3396	0.391
3361	2.01	3.05	31.9	sp|Q86VI3|IQGA3_HUMAN	Ras GTPase-activating-like protein IQGAP3 OS=Homo sapiens GN=IQGAP3 PE=1 SV=2	HUMAN	2	0.3731	1.0637	0.3414	0.4004
3293	2.03	2.03	17.5	sp|Q99622|C10_HUMAN	Protein C10 OS=Homo sapiens GN=C12orf57 PE=1 SV=1	HUMAN	1	0.375	0.4085	0.3397	0.4036
4531	0.13	0.28	11.8	sp|Q06413|MEF2C_HUMAN	Myocyte-specific enhancer factor 2C OS=Homo sapiens GN=MEF2C PE=1 SV=1	HUMAN	2	0.3755	0.6441	0.7636	0.4042
2659	3.96	3.97	43.4	sp|Q14919|NC2A_HUMAN	Dr1-associated corepressor OS=Homo sapiens GN=DRAP1 PE=1 SV=3	HUMAN	2	0.3802	0.571	0.461	0.4073
4108	0.67	0.89	24.6	sp|P40692|MLH1_HUMAN	DNA mismatch repair protein Mlh1 OS=Homo sapiens GN=MLH1 PE=1 SV=1	HUMAN	1	0.3835	0.7248	0.6525	0.4131
4773	0.07	0.2	26.6	RRRRRsp|P11277|SPTB1_HUMAN	REVERSED Spectrin beta chain, erythrocytic OS=Homo sapiens GN=SPTB PE=1 SV=5	HUMAN	0	0.3837	0.3861	0.7806	0.4185
4389	0.21	0.38	22.9	sp|P46019|KPB2_HUMAN	Phosphorylase b kinase regulatory subunit alpha, liver isoform OS=Homo sapiens GN=PHKA2 PE=1 SV=1	HUMAN	1	0.3926	0.7727	0.2984	0.4211
3223	2.06	2.09	31.5	sp|Q96J02|ITCH_HUMAN	E3 ubiquitin-protein ligase Itchy homolog OS=Homo sapiens GN=ITCH PE=1 SV=2	HUMAN	1	0.3936	0.6074	0.6835	0.4217
3776	1.86	2.03	22.8	sp|O14607|UTY_HUMAN	Histone demethylase UTY OS=Homo sapiens GN=UTY PE=1 SV=2	HUMAN	1	0.4003	1.1398	0.3857	0.4221
4111	0.67	0.73	34.5	sp|Q5VZM2|RRAGB_HUMAN	Ras-related GTP-binding protein B OS=Homo sapiens GN=RRAGB PE=1 SV=1	HUMAN	1	0.4012	0.7531	0.6125	0.4237
4540	0.13	0.15	30.1	sp|Q9BR61|ACBD6_HUMAN	Acyl-CoA-binding domain-containing protein 6 OS=Homo sapiens GN=ACBD6 PE=1 SV=1	HUMAN	0	0.4027	0.9456	0.5568	0.4262
3379	2.01	2.36	24.5	sp|Q658Y4|F91A1_HUMAN	Protein FAM91A1 OS=Homo sapiens GN=FAM91A1 PE=1 SV=3	HUMAN	1	0.4033	0.8829	0.3741	0.4317
4487	0.15	0.18	16.1	sp|Q8TBF4|ZCRB1_HUMAN	Zinc finger CCHC-type and RNA-binding motif-containing protein 1 OS=Homo sapiens GN=ZCRB1 PE=1 SV=2	HUMAN	0	0.4033	0.7347	1.6041	0.4333
3059	2.34	2.48	25.3	sp|Q53H47|SETMR_HUMAN	Histone-lysine N-methyltransferase SETMAR OS=Homo sapiens GN=SETMAR PE=1 SV=1	HUMAN	2	0.4096	0.583	0.3811	0.4345
3987	1.03	1.16	66.3	sp|P62306|RUXF_HUMAN	Small nuclear ribonucleoprotein F OS=Homo sapiens GN=SNRPF PE=1 SV=1	HUMAN	2	0.4096	0.8206	1.2868	0.4348
3817	1.71	1.73	37	sp|Q9BZL1|UBL5_HUMAN	Ubiquitin-like protein 5 OS=Homo sapiens GN=UBL5 PE=1 SV=1	HUMAN	3	0.4112	0.7901	0.435	0.435
2954	2.64	2.8	48.1	sp|P50238|CRIP1_HUMAN	Cysteine-rich protein 1 OS=Homo sapiens GN=CRIP1 PE=1 SV=3	HUMAN	3	0.4168	0.5749	0.7641	0.437
4200	0.46	2.88	41.6	sp|P42679|MATK_HUMAN	Megakaryocyte-associated tyrosine-protein kinase OS=Homo sapiens GN=MATK PE=1 SV=1	HUMAN	4	0.4175	0.9546	0.5266	0.4375
3489	2	2.49	33.9	sp|Q9UL63|MKLN1_HUMAN	Muskelin OS=Homo sapiens GN=MKLN1 PE=1 SV=2	HUMAN	1	0.4177	0.7485	0.8378	0.4412
4143	0.58	0.73	31	sp|Q9UIA0|CYH4_HUMAN	Cytohesin-4 OS=Homo sapiens GN=CYTH4 PE=1 SV=1	HUMAN	1	0.4196	0.5757	0.7606	0.4432
1933	6.15	9.37	37.7	sp|Q7Z3J2|CP062_HUMAN	UPF0505 protein C16orf62 OS=Homo sapiens GN=C16orf62 PE=1 SV=2	HUMAN	5	0.4216	1.051	0.4106	0.4447
3300	2.02	2.73	34.3	sp|P48736|PK3CG_HUMAN	Phosphatidylinositol 4,5-bisphosphate 3-kinase catalytic subunit gamma isoform OS=Homo sapiens GN=PIK3CG PE=1 SV=3	HUMAN	2	0.4228	0.9487	0.5593	0.445
3429	2.01	2.08	30.4	sp|P50281|MMP14_HUMAN	Matrix metalloproteinase-14 OS=Homo sapiens GN=MMP14 PE=1 SV=3	HUMAN	1	0.424	0.6665	0.8929	0.4523
3721	2	2.01	41.6	sp|Q7Z5G4|GOGA7_HUMAN	Golgin subfamily A member 7 OS=Homo sapiens GN=GOLGA7 PE=1 SV=2	HUMAN	1	0.4277	0.9136	0.4345	0.4545
4850	0.06	0.2	49.1	RRRRRsp|Q8WVM0|TFB1M_HUMAN	REVERSED Dimethyladenosine transferase 1, mitochondrial OS=Homo sapiens GN=TFB1M PE=1 SV=1	HUMAN	0	0.4283	2.3114	100	0.4564
3734	2	2.01	5.7	sp|O95685|PPR3D_HUMAN	Protein phosphatase 1 regulatory subunit 3D OS=Homo sapiens GN=PPP1R3D PE=1 SV=1	HUMAN	1	0.4324	0.7144	0.6113	0.4576
3815	1.72	1.75	29	sp|Q86V88|MGDP1_HUMAN	Magnesium-dependent phosphatase 1 OS=Homo sapiens GN=MDP1 PE=1 SV=1	HUMAN	1	0.4339	1.0278	0.4872	0.4605
3367	2.01	2.55	16.8	sp|Q76L83|ASXL2_HUMAN	Putative Polycomb group protein ASXL2 OS=Homo sapiens GN=ASXL2 PE=1 SV=1	HUMAN	2	0.435	1.1033	1.0464	0.462
4283	0.32	1.3	17.6	sp|O94829|IPO13_HUMAN	Importin-13 OS=Homo sapiens GN=IPO13 PE=1 SV=3	HUMAN	2	0.4373	0.9549	0.5015	0.468
2979	2.56	2.58	34.3	sp|P62310|LSM3_HUMAN	U6 snRNA-associated Sm-like protein LSm3 OS=Homo sapiens GN=LSM3 PE=1 SV=2	HUMAN	2	0.439	1.497	0.3811	0.4704
3507	2	2.38	40.8	sp|P45983|MK08_HUMAN	Mitogen-activated protein kinase 8 OS=Homo sapiens GN=MAPK8 PE=1 SV=2	HUMAN	1	0.4427	0.4582	0.6598	0.4743
3804	1.77	1.85	16.8	sp|Q9BZ67|FRMD8_HUMAN	FERM domain-containing protein 8 OS=Homo sapiens GN=FRMD8 PE=1 SV=1	HUMAN	1	0.4434	0.4189	0.6607	0.4751
4002	0.99	1.03	7.7	sp|Q96HP4|OXND1_HUMAN	Oxidoreductase NAD-binding domain-containing protein 1 OS=Homo sapiens GN=OXNAD1 PE=1 SV=1	HUMAN	1	0.4461	0.8812	0.4199	0.4783
3962	1.13	1.15	65.6	sp|P80723|BASP1_HUMAN	Brain acid soluble protein 1 OS=Homo sapiens GN=BASP1 PE=1 SV=2	HUMAN	2	0.4484	0.698	0.6616	0.4794
4592	0.11	0.27	29.5	sp|Q96G25|MED8_HUMAN	Mediator of RNA polymerase II transcription subunit 8 OS=Homo sapiens GN=MED8 PE=1 SV=2	HUMAN	0	0.4503	0.6809	0.5137	0.4799
3364	2.01	2.67	15.3	sp|Q9NW15|ANO10_HUMAN	Anoctamin-10 OS=Homo sapiens GN=ANO10 PE=1 SV=2	HUMAN	1	0.454	1.2337	1.0325	0.4802
4175	0.52	0.52	4.5	sp|Q6UXH1|CREL2_HUMAN	Cysteine-rich with EGF-like domain protein 2 OS=Homo sapiens GN=CRELD2 PE=1 SV=1	HUMAN	1	0.4554	0.6554	0.34	0.4811
3350	2.01	7.57	42.9	sp|Q06787|FMR1_HUMAN	Fragile X mental retardation protein 1 OS=Homo sapiens GN=FMR1 PE=1 SV=1	HUMAN	4	0.4563	0.8481	0.4485	0.4849
3763	1.92	2.07	24.7	sp|Q5VV42|CDKAL_HUMAN	Threonylcarbamoyladenosine tRNA methylthiotransferase OS=Homo sapiens GN=CDKAL1 PE=1 SV=1	HUMAN	2	0.4611	0.6372	0.3653	0.4878
4266	0.35	0.36	24.6	sp|Q9NX76|CKLF6_HUMAN	CKLF-like MARVEL transmembrane domain-containing protein 6 OS=Homo sapiens GN=CMTM6 PE=1 SV=1	HUMAN	1	0.4632	0.5085	1.5855	0.4893
3341	2.02	2.03	55.1	sp|Q9Y2Q9|RT28_HUMAN	28S ribosomal protein S28, mitochondrial OS=Homo sapiens GN=MRPS28 PE=1 SV=1	HUMAN	1	0.4664	0.5883	0.4616	0.4897
3839	1.63	2.1	25.2	sp|Q9ULH0|KDIS_HUMAN	Kinase D-interacting substrate of 220 kDa OS=Homo sapiens GN=KIDINS220 PE=1 SV=3	HUMAN	1	0.4683	0.6555	0.3437	0.4924
4317	0.28	0.57	23.9	sp|Q9H857|NT5D2_HUMAN	5'-nucleotidase domain-containing protein 2 OS=Homo sapiens GN=NT5DC2 PE=1 SV=1	HUMAN	0	0.4726	0.821	0.5113	0.4932
3643	2	2.04	36.2	sp|Q52LR7|EPC2_HUMAN	Enhancer of polycomb homolog 2 OS=Homo sapiens GN=EPC2 PE=1 SV=2	HUMAN	1	0.4727	0.2295	1.7252	0.4987
4068	0.79	0.93	56.7	sp|Q9NV35|NUD15_HUMAN	Probable 8-oxo-dGTP diphosphatase NUDT15 OS=Homo sapiens GN=NUDT15 PE=1 SV=1	HUMAN	1	0.4799	0.7719	0.5009	0.4995
4996	0.05	0.06	35.8	sp|Q5BJH2|TM128_HUMAN	Transmembrane protein 128 OS=Homo sapiens GN=TMEM128 PE=2 SV=1	HUMAN	0	0.4809	1.633	0.4263	0.5001
3780	1.85	2.27	18.8	sp|Q6FIF0|ZFAN6_HUMAN	AN1-type zinc finger protein 6 OS=Homo sapiens GN=ZFAND6 PE=1 SV=2	HUMAN	1	0.4823	0.7298	1.2493	0.504
3357	2.01	3.65	32	sp|P30260|CDC27_HUMAN	Cell division cycle protein 27 homolog OS=Homo sapiens GN=CDC27 PE=1 SV=2	HUMAN	2	0.4847	0.8192	0.4863	0.5045
4869	0.06	0.1	38.2	sp|Q9UQB8|BAIP2_HUMAN	Brain-specific angiogenesis inhibitor 1-associated protein 2 OS=Homo sapiens GN=BAIAP2 PE=1 SV=1	HUMAN	0	0.4875	0.4468	0.4935	0.5047
3726	2	2.01	20	sp|Q9NZJ9|NUDT4_HUMAN	Diphosphoinositol polyphosphate phosphohydrolase 2 OS=Homo sapiens GN=NUDT4 PE=1 SV=2	HUMAN	1	0.4884	0.7967	0.6065	0.5054
2136	5.56	6.14	28.7	sp|Q6DD88|ATLA3_HUMAN	Atlastin-3 OS=Homo sapiens GN=ATL3 PE=1 SV=1	HUMAN	5	0.4911	0.6842	0.5487	0.5099
3629	2	2.06	12.9	sp|Q9BT22|ALG1_HUMAN	Chitobiosyldiphosphodolichol beta-mannosyltransferase OS=Homo sapiens GN=ALG1 PE=1 SV=2	HUMAN	1	0.4917	0.6869	0.7358	0.5101
2676	3.88	4.61	26.5	sp|Q13472|TOP3A_HUMAN	DNA topoisomerase 3-alpha OS=Homo sapiens GN=TOP3A PE=1 SV=1	HUMAN	2	0.4926	0.9376	0.6044	0.5107
3809	1.74	1.74	37.9	sp|O75817|POP7_HUMAN	Ribonuclease P protein subunit p20 OS=Homo sapiens GN=POP7 PE=1 SV=2	HUMAN	1	0.4932	0.351	0.825	0.5127
1360	9.95	9.95	62.1	sp|P49006|MRP_HUMAN	MARCKS-related protein OS=Homo sapiens GN=MARCKSL1 PE=1 SV=2	HUMAN	7	0.4937	0.9149	0.4117	0.5142
3376	2.01	2.37	19.2	sp|Q8IUR0|TPPC5_HUMAN	Trafficking protein particle complex subunit 5 OS=Homo sapiens GN=TRAPPC5 PE=1 SV=1	HUMAN	2	0.4939	0.6751	0.6008	0.5151
3623	2	2.07	23.6	sp|Q7Z4R8|CF120_HUMAN	UPF0669 protein C6orf120 OS=Homo sapiens GN=C6orf120 PE=1 SV=1	HUMAN	1	0.494	0.826	0.3707	0.516
4405	0.19	1.23	33.9	sp|Q69YQ0|CYTSA_HUMAN	Cytospin-A OS=Homo sapiens GN=SPECC1L PE=1 SV=2	HUMAN	1	0.4984	0.5488	0.6299	0.518
3562	2	2.18	16.5	sp|Q12913|PTPRJ_HUMAN	Receptor-type tyrosine-protein phosphatase eta OS=Homo sapiens GN=PTPRJ PE=1 SV=3	HUMAN	1	0.4994	0.4873	0.8585	0.5184
3176	2.11	2.14	34	sp|Q96EB1|ELP4_HUMAN	Elongator complex protein 4 OS=Homo sapiens GN=ELP4 PE=1 SV=2	HUMAN	1	0.5002	0.6765	0.8217	0.5217
4194	0.48	0.5	28.2	sp|Q9Y478|AAKB1_HUMAN	5'-AMP-activated protein kinase subunit beta-1 OS=Homo sapiens GN=PRKAB1 PE=1 SV=4	HUMAN	1	0.5004	0.6239	0.4112	0.5261
4498	0.14	0.29	28.7	sp|O75521|ECI2_HUMAN	Enoyl-CoA delta isomerase 2, mitochondrial OS=Homo sapiens GN=ECI2 PE=1 SV=4	HUMAN	0	0.5022	0.7494	0.5874	0.5279
3547	2	2.21	24.1	sp|Q9Y251|HPSE_HUMAN	Heparanase OS=Homo sapiens GN=HPSE PE=1 SV=2	HUMAN	1	0.5037	0.5799	0.5453	0.5283
3328	2.02	2.07	18.8	sp|O95479|G6PE_HUMAN	GDH/6PGL endoplasmic bifunctional protein OS=Homo sapiens GN=H6PD PE=1 SV=2	HUMAN	1	0.5049	0.5204	0.5006	0.5298
3610	2	2.08	36.9	sp|P61244|MAX_HUMAN	Protein max OS=Homo sapiens GN=MAX PE=1 SV=1	HUMAN	2	0.5053	0.6011	1.0682	0.53
3103	2.22	2.25	28.6	sp|P78324|SHPS1_HUMAN	Tyrosine-protein phosphatase non-receptor type substrate 1 OS=Homo sapiens GN=SIRPA PE=1 SV=2	HUMAN	2	0.5079	1.2233	0.6186	0.5303
4924	0.05	0.4	28.1	sp|Q9UBT7|CTNL1_HUMAN	Alpha-catulin OS=Homo sapiens GN=CTNNAL1 PE=1 SV=2	HUMAN	0	0.5097	0.9439	0.3551	0.5314
4049	0.84	1	28.2	sp|O14672|ADA10_HUMAN	Disintegrin and metalloproteinase domain-containing protein 10 OS=Homo sapiens GN=ADAM10 PE=1 SV=1	HUMAN	1	0.5102	0.5115	0.6382	0.5322
4449	0.17	0.21	18.1	RRRRRsp|Q7Z340|ZN551_HUMAN	REVERSED Zinc finger protein 551 OS=Homo sapiens GN=ZNF551 PE=1 SV=3	HUMAN	0	0.5102	0.8845	0.9909	0.5334
2225	5.08	5.08	36.2	sp|Q9HCN8|SDF2L_HUMAN	Stromal cell-derived factor 2-like protein 1 OS=Homo sapiens GN=SDF2L1 PE=1 SV=2	HUMAN	5	0.5115	0.7125	0.6506	0.5499
3986	1.03	1.6	26.9	sp|P49815|TSC2_HUMAN	Tuberin OS=Homo sapiens GN=TSC2 PE=1 SV=2	HUMAN	3	0.5116	0.9219	0.5246	0.5536
3025	2.43	2.5	23.9	sp|Q13546|RIPK1_HUMAN	Receptor-interacting serine/threonine-protein kinase 1 OS=Homo sapiens GN=RIPK1 PE=1 SV=3	HUMAN	2	0.5119	0.5173	0.9602	0.5556
4146	0.57	4.73	25.1	sp|P48426|PI42A_HUMAN	Phosphatidylinositol 5-phosphate 4-kinase type-2 alpha OS=Homo sapiens GN=PIP4K2A PE=1 SV=2	HUMAN	3	0.5121	0.7821	0.6999	0.5584
4906	0.05	1.7	20.8	sp|Q9C0I3|F190A_HUMAN	Protein FAM190A OS=Homo sapiens GN=FAM190A PE=2 SV=2	HUMAN	1	0.5144	0.8033	1.0521	0.5618
2423	4.15	4.26	24.3	sp|Q7Z4V5|HDGR2_HUMAN	Hepatoma-derived growth factor-related protein 2 OS=Homo sapiens GN=HDGFRP2 PE=1 SV=1	HUMAN	3	0.5187	1.3804	0.5272	0.5631
3595	2	2.1	24.5	sp|Q8IYM9|TRI22_HUMAN	E3 ubiquitin-protein ligase TRIM22 OS=Homo sapiens GN=TRIM22 PE=1 SV=1	HUMAN	1	0.5192	1.235	0.5951	0.5644
4231	0.4	0.55	30.1	sp|Q9BVM4|A2LD1_HUMAN	Gamma-glutamylaminecyclotransferase OS=Homo sapiens GN=A2LD1 PE=1 SV=2	HUMAN	1	0.5233	0.3976	5.389	0.5645
2116	5.69	6.56	31.4	sp|Q9HD26|GOPC_HUMAN	Golgi-associated PDZ and coiled-coil motif-containing protein OS=Homo sapiens GN=GOPC PE=1 SV=1	HUMAN	3	0.5274	0.9864	0.5218	0.5662
3015	2.45	3.04	31.3	sp|Q8IWA0|WDR75_HUMAN	WD repeat-containing protein 75 OS=Homo sapiens GN=WDR75 PE=1 SV=1	HUMAN	3	0.5291	0.7033	0.594	0.5672
3937	1.25	1.53	33.4	sp|Q7Z4H7|HAUS6_HUMAN	HAUS augmin-like complex subunit 6 OS=Homo sapiens GN=HAUS6 PE=1 SV=2	HUMAN	1	0.5294	0.8497	0.7672	0.5726
2813	3.24	3.57	29.6	sp|Q8IUI8|CRLF3_HUMAN	Cytokine receptor-like factor 3 OS=Homo sapiens GN=CRLF3 PE=1 SV=2	HUMAN	2	0.53	1.1569	0.4358	0.5728
3349	2.01	8.36	38.4	sp|Q9Y6E0|STK24_HUMAN	Serine/threonine-protein kinase 24 OS=Homo sapiens GN=STK24 PE=1 SV=1	HUMAN	5	0.5318	0.6632	0.7422	0.5736
3083	2.28	2.47	25.3	sp|Q9HCK8|CHD8_HUMAN	Chromodomain-helicase-DNA-binding protein 8 OS=Homo sapiens GN=CHD8 PE=1 SV=5	HUMAN	4	0.5334	0.718	0.6932	0.5739
2003	6.03	6.1	48.7	sp|Q9HBM1|SPC25_HUMAN	Kinetochore protein Spc25 OS=Homo sapiens GN=SPC25 PE=1 SV=1	HUMAN	4	0.5335	0.9152	0.531	0.5758
4529	0.13	0.32	34	RRRRRsp|Q9H930|LY10L_HUMAN	REVERSED Nuclear body protein SP140-like protein OS=Homo sapiens GN=SP140L PE=2 SV=3	HUMAN	1	0.534	1.1828	0.7702	0.577
3542	2	2.22	24.2	sp|O94782|UBP1_HUMAN	Ubiquitin carboxyl-terminal hydrolase 1 OS=Homo sapiens GN=USP1 PE=1 SV=1	HUMAN	2	0.5373	0.9186	1.039	0.5816
4021	0.92	1.16	27.5	sp|Q92851|CASPA_HUMAN	Caspase-10 OS=Homo sapiens GN=CASP10 PE=1 SV=3	HUMAN	1	0.5427	0.5957	0.5168	0.5834
4009	0.96	1.26	28.5	sp|A0JNW5|UH1BL_HUMAN	UHRF1-binding protein 1-like OS=Homo sapiens GN=UHRF1BP1L PE=1 SV=2	HUMAN	2	0.5441	0.8669	0.4567	0.5851
3491	2	2.44	21.9	sp|Q9UBD5|ORC3_HUMAN	Origin recognition complex subunit 3 OS=Homo sapiens GN=ORC3 PE=1 SV=1	HUMAN	1	0.5446	0.7371	0.6575	0.586
4365	0.23	0.31	41.6	sp|Q96AT1|K1143_HUMAN	Uncharacterized protein KIAA1143 OS=Homo sapiens GN=KIAA1143 PE=1 SV=2	HUMAN	0	0.5462	0.6065	0.6442	0.5871
4145	0.58	0.59	12.8	sp|Q9Y4X5|ARI1_HUMAN	E3 ubiquitin-protein ligase ARIH1 OS=Homo sapiens GN=ARIH1 PE=1 SV=2	HUMAN	1	0.5473	0.725	1.2166	0.5873
3740	2	2	22.7	sp|Q9H3H3|CK068_HUMAN	UPF0696 protein C11orf68 OS=Homo sapiens GN=C11orf68 PE=1 SV=2	HUMAN	1	0.5514	0.8588	0.5447	0.5885
2529	4.01	5.94	41.6	sp|Q9UKZ1|CB029_HUMAN	UPF0760 protein C2orf29 OS=Homo sapiens GN=C2orf29 PE=1 SV=1	HUMAN	3	0.5518	0.9088	0.7057	0.5891
3771	1.87	3.28	31	sp|Q9NVI1|FANCI_HUMAN	Fanconi anemia group I protein OS=Homo sapiens GN=FANCI PE=1 SV=4	HUMAN	2	0.552	0.9079	0.4444	0.5896
989	13.65	13.67	87.8	sp|P05204|HMGN2_HUMAN	Non-histone chromosomal protein HMG-17 OS=Homo sapiens GN=HMGN2 PE=1 SV=3	HUMAN	10	0.5528	0.9223	0.6893	0.591
3073	2.3	2.4	38.8	sp|Q14691|PSF1_HUMAN	DNA replication complex GINS protein PSF1 OS=Homo sapiens GN=GINS1 PE=1 SV=1	HUMAN	2	0.5533	1.0351	0.7809	0.591
1158	11.79	11.85	79	sp|Q9ULZ3|ASC_HUMAN	Apoptosis-associated speck-like protein containing a CARD OS=Homo sapiens GN=PYCARD PE=1 SV=2	HUMAN	9	0.5542	0.9318	0.5826	0.5979
3997	1.01	1.15	17.4	sp|Q5H8A4|PIGG_HUMAN	GPI ethanolamine phosphate transferase 2 OS=Homo sapiens GN=PIGG PE=1 SV=1	HUMAN	1	0.5548	0.9077	0.2467	0.598
3202	2.08	2.13	25.7	sp|Q8NDF8|PAPD5_HUMAN	PAP-associated domain-containing protein 5 OS=Homo sapiens GN=PAPD5 PE=1 SV=2	HUMAN	1	0.5551	0.6661	0.792	0.599
3528	2	2.27	22.6	sp|Q9BUL9|RPP25_HUMAN	Ribonuclease P protein subunit p25 OS=Homo sapiens GN=RPP25 PE=1 SV=1	HUMAN	1	0.5564	1.2022	0.6418	0.6005
4623	0.1	0.26	30	sp|Q9NXG2|THUM1_HUMAN	THUMP domain-containing protein 1 OS=Homo sapiens GN=THUMPD1 PE=1 SV=2	HUMAN	0	0.5569	1.0747	1.0271	0.6005
2007	6.02	6.76	22.3	sp|Q92547|TOPB1_HUMAN	DNA topoisomerase 2-binding protein 1 OS=Homo sapiens GN=TOPBP1 PE=1 SV=3	HUMAN	3	0.557	0.7245	0.8717	0.6006
2663	3.94	4.31	30.8	sp|Q04446|GLGB_HUMAN	1,4-alpha-glucan-branching enzyme OS=Homo sapiens GN=GBE1 PE=1 SV=3	HUMAN	2	0.5573	1.0509	1.0278	0.6015
3387	2.01	2.31	18.5	sp|Q9NP92|RT30_HUMAN	28S ribosomal protein S30, mitochondrial OS=Homo sapiens GN=MRPS30 PE=1 SV=2	HUMAN	1	0.5574	0.9128	0.4779	0.6016
4724	0.08	0.13	22	sp|Q8IXH7|NELFD_HUMAN	Negative elongation factor C/D OS=Homo sapiens GN=TH1L PE=1 SV=2	HUMAN	0	0.5594	0.6873	0.9517	0.6017
3380	2.01	2.35	17.6	sp|Q6PJ69|TRI65_HUMAN	Tripartite motif-containing protein 65 OS=Homo sapiens GN=TRIM65 PE=1 SV=3	HUMAN	1	0.5598	0.6747	0.3903	0.6022
2761	3.51	3.87	31.8	sp|Q14457|BECN1_HUMAN	Beclin-1 OS=Homo sapiens GN=BECN1 PE=1 SV=2	HUMAN	2	0.5601	0.6601	0.695	0.6032
2789	3.37	3.6	30.1	sp|Q9Y5X2|SNX8_HUMAN	Sorting nexin-8 OS=Homo sapiens GN=SNX8 PE=1 SV=1	HUMAN	3	0.5616	0.922	0.6088	0.6036
2884	2.98	2.98	15.9	sp|Q96B23|CR025_HUMAN	Uncharacterized protein C18orf25 OS=Homo sapiens GN=C18orf25 PE=1 SV=2	HUMAN	2	0.5618	0.9262	0.6279	0.6044
3917	1.32	1.5	25.6	sp|Q96L50|LLR1_HUMAN	Leucine-rich repeat protein 1 OS=Homo sapiens GN=LRR1 PE=1 SV=2	HUMAN	2	0.5622	0.9532	0.3309	0.6064
2476	4.05	4.58	26	sp|Q8IUR7|ARMC8_HUMAN	Armadillo repeat-containing protein 8 OS=Homo sapiens GN=ARMC8 PE=1 SV=2	HUMAN	3	0.5636	0.8655	0.7641	0.6084
4693	0.08	0.71	22.6	sp|Q8NEM7|FA48A_HUMAN	Protein FAM48A OS=Homo sapiens GN=FAM48A PE=1 SV=2	HUMAN	0	0.5646	0.3981	0.1881	0.6099
4258	0.36	0.63	15.9	sp|Q13227|GPS2_HUMAN	G protein pathway suppressor 2 OS=Homo sapiens GN=GPS2 PE=1 SV=3	HUMAN	1	0.565	1.0601	0.5637	0.6102
3297	2.02	4.04	33.4	sp|Q02818|NUCB1_HUMAN	Nucleobindin-1 OS=Homo sapiens GN=NUCB1 PE=1 SV=4	HUMAN	2	0.565	1.0861	0.663	0.6107
3834	1.66	1.67	14.6	sp|Q07817|B2CL1_HUMAN	Bcl-2-like protein 1 OS=Homo sapiens GN=BCL2L1 PE=1 SV=1	HUMAN	1	0.5659	1.3393	1.0096	0.6108
2885	2.97	3.48	45.9	sp|P56377|AP1S2_HUMAN	AP-1 complex subunit sigma-2 OS=Homo sapiens GN=AP1S2 PE=1 SV=1	HUMAN	3	0.566	0.5077	0.5688	0.6127
4979	0.05	0.1	25	sp|P40123|CAP2_HUMAN	Adenylyl cyclase-associated protein 2 OS=Homo sapiens GN=CAP2 PE=1 SV=1	HUMAN	0	0.5663	0.9838	0.4927	0.6142
2669	3.92	3.93	29.9	sp|Q9Y294|ASF1A_HUMAN	Histone chaperone ASF1A OS=Homo sapiens GN=ASF1A PE=1 SV=1	HUMAN	5	0.5676	1.3184	0.5576	0.6155
3886	1.46	1.49	16.7	sp|O43617|TPPC3_HUMAN	Trafficking protein particle complex subunit 3 OS=Homo sapiens GN=TRAPPC3 PE=1 SV=1	HUMAN	1	0.5677	0.6723	0.7714	0.6164
2972	2.57	3.17	34.6	sp|Q9NRZ9|HELLS_HUMAN	Lymphoid-specific helicase OS=Homo sapiens GN=HELLS PE=1 SV=1	HUMAN	2	0.5684	0.5997	0.7075	0.6166
809	16.21	16.94	87.4	sp|P06454|PTMA_HUMAN	Prothymosin alpha OS=Homo sapiens GN=PTMA PE=1 SV=2	HUMAN	12	0.572	0.897	0.6305	0.6171
3758	2	2	7.5	sp|P01034|CYTC_HUMAN	Cystatin-C OS=Homo sapiens GN=CST3 PE=1 SV=1	HUMAN	1	0.5721	0.8132	0.6282	0.6179
2666	3.93	4.58	36.5	sp|P20585|MSH3_HUMAN	DNA mismatch repair protein Msh3 OS=Homo sapiens GN=MSH3 PE=1 SV=4	HUMAN	2	0.5724	1.0692	0.5683	0.6186
4795	0.07	0.09	15.2	sp|Q9UEG4|ZN629_HUMAN	Zinc finger protein 629 OS=Homo sapiens GN=ZNF629 PE=2 SV=2	HUMAN	0	0.5729	0.6981	0.7427	0.619
3754	2	2	19.2	sp|P79522|PRR3_HUMAN	Proline-rich protein 3 OS=Homo sapiens GN=PRR3 PE=2 SV=2	HUMAN	1	0.575	0.693	0.7762	0.6194
3596	2	2.1	19.7	sp|Q9H8H3|MET7A_HUMAN	Methyltransferase-like protein 7A OS=Homo sapiens GN=METTL7A PE=1 SV=1	HUMAN	1	0.5752	0.818	0.685	0.6197
4478	0.15	0.28	45.7	RRRRRsp|O75874|IDHC_HUMAN	REVERSED Isocitrate dehydrogenase [NADP] cytoplasmic OS=Homo sapiens GN=IDH1 PE=1 SV=2	HUMAN	0	0.5772	0.9284	0.4238	0.6206
2691	3.81	4.12	24	sp|Q9Y5B6|GCFC1_HUMAN	GC-rich sequence DNA-binding factor 1 OS=Homo sapiens GN=GCFC1 PE=1 SV=2	HUMAN	2	0.5779	0.8643	0.5523	0.6208
2933	2.75	2.82	31.9	sp|Q8NBX0|SCPDL_HUMAN	Saccharopine dehydrogenase-like oxidoreductase OS=Homo sapiens GN=SCCPDH PE=1 SV=1	HUMAN	3	0.578	0.8027	0.7553	0.6208
4287	0.32	0.39	36.6	sp|Q8WUH1|CHUR_HUMAN	Protein Churchill OS=Homo sapiens GN=CHURC1 PE=1 SV=1	HUMAN	1	0.5786	0.6668	0.7994	0.6218
2021	6.01	6.29	42.2	sp|Q92696|PGTA_HUMAN	Geranylgeranyl transferase type-2 subunit alpha OS=Homo sapiens GN=RABGGTA PE=1 SV=2	HUMAN	3	0.5801	0.8515	1.1682	0.6221
2817	3.24	3.3	29.4	sp|Q9HCE5|MET14_HUMAN	Methyltransferase-like protein 14 OS=Homo sapiens GN=METTL14 PE=1 SV=2	HUMAN	2	0.5803	1.0805	0.589	0.6227
3090	2.27	2.27	39.5	sp|Q9Y2V2|CHSP1_HUMAN	Calcium-regulated heat stable protein 1 OS=Homo sapiens GN=CARHSP1 PE=1 SV=2	HUMAN	3	0.5818	0.7602	0.6527	0.6242
2539	4.01	4.53	27.8	sp|O75448|MED24_HUMAN	Mediator of RNA polymerase II transcription subunit 24 OS=Homo sapiens GN=MED24 PE=1 SV=1	HUMAN	3	0.5821	0.6123	0.6237	0.6243
1711	7.52	8.18	42.5	sp|Q9Y3A4|RRP7A_HUMAN	Ribosomal RNA-processing protein 7 homolog A OS=Homo sapiens GN=RRP7A PE=1 SV=2	HUMAN	5	0.5865	0.8054	0.7308	0.6244
1665	7.82	8.25	43.4	sp|Q9Y276|BCS1_HUMAN	Mitochondrial chaperone BCS1 OS=Homo sapiens GN=BCS1L PE=1 SV=1	HUMAN	4	0.5881	0.9345	0.6876	0.6248
1725	7.38	7.65	46.7	sp|Q9BY42|CT043_HUMAN	UPF0549 protein C20orf43 OS=Homo sapiens GN=C20orf43 PE=1 SV=3	HUMAN	4	0.5884	0.9464	0.5789	0.625
1824	6.71	6.72	53.5	sp|P10606|COX5B_HUMAN	Cytochrome c oxidase subunit 5B, mitochondrial OS=Homo sapiens GN=COX5B PE=1 SV=2	HUMAN	6	0.5885	0.7731	0.736	0.6268
3401	2.01	2.24	32	sp|Q8IX18|DHX40_HUMAN	Probable ATP-dependent RNA helicase DHX40 OS=Homo sapiens GN=DHX40 PE=1 SV=2	HUMAN	1	0.5897	0.5907	1.1627	0.6278
2693	3.8	5.78	31.6	sp|Q8NEM2|SHCBP_HUMAN	SHC SH2 domain-binding protein 1 OS=Homo sapiens GN=SHCBP1 PE=1 SV=3	HUMAN	2	0.5907	0.8855	0.8154	0.6282
3235	2.05	2.17	22.3	sp|Q5T447|HECD3_HUMAN	E3 ubiquitin-protein ligase HECTD3 OS=Homo sapiens GN=HECTD3 PE=1 SV=1	HUMAN	2	0.5912	0.8088	0.7309	0.6306
3802	1.78	1.78	29.8	sp|Q9Y508|RN114_HUMAN	RING finger protein 114 OS=Homo sapiens GN=RNF114 PE=1 SV=1	HUMAN	1	0.5912	0.9389	0.7799	0.6316
1982	6.05	6.39	31.8	sp|Q8N806|UBR7_HUMAN	Putative E3 ubiquitin-protein ligase UBR7 OS=Homo sapiens GN=UBR7 PE=1 SV=2	HUMAN	4	0.5913	0.7768	0.6775	0.6325
3225	2.06	2.09	33.9	sp|O75935|DCTN3_HUMAN	Dynactin subunit 3 OS=Homo sapiens GN=DCTN3 PE=1 SV=1	HUMAN	2	0.5933	0.7995	0.6304	0.6336
1816	6.79	8.82	18.2	sp|Q96II8|LRCH3_HUMAN	Leucine-rich repeat and calponin homology domain-containing protein 3 OS=Homo sapiens GN=LRCH3 PE=1 SV=2	HUMAN	4	0.5937	0.8705	0.7053	0.6339
3053	2.35	2.41	9.7	sp|Q9H8P0|PORED_HUMAN	Polyprenol reductase OS=Homo sapiens GN=SRD5A3 PE=1 SV=1	HUMAN	1	0.5939	0.5837	0.8062	0.635
4419	0.18	2.22	21.1	sp|O15439|MRP4_HUMAN	Multidrug resistance-associated protein 4 OS=Homo sapiens GN=ABCC4 PE=1 SV=3	HUMAN	1	0.5947	1.0269	0.5552	0.6363
3854	1.56	1.8	17.8	sp|P30825|CTR1_HUMAN	High affinity cationic amino acid transporter 1 OS=Homo sapiens GN=SLC7A1 PE=1 SV=1	HUMAN	1	0.595	0.5014	1.2211	0.6367
4810	0.06	1.12	38.4	sp|Q53EZ4|CEP55_HUMAN	Centrosomal protein of 55 kDa OS=Homo sapiens GN=CEP55 PE=1 SV=3	HUMAN	1	0.5953	1.0555	0.8078	0.6378
3536	2	2.24	30.5	sp|Q5F1R6|DJC21_HUMAN	DnaJ homolog subfamily C member 21 OS=Homo sapiens GN=DNAJC21 PE=1 SV=2	HUMAN	1	0.5958	0.8777	0.5148	0.6385
2518	4.02	4.31	53.6	sp|Q9BZX2|UCK2_HUMAN	Uridine-cytidine kinase 2 OS=Homo sapiens GN=UCK2 PE=1 SV=1	HUMAN	2	0.5965	0.6833	0.7302	0.6388
1963	6.08	14.74	36	sp|Q92804|RBP56_HUMAN	TATA-binding protein-associated factor 2N OS=Homo sapiens GN=TAF15 PE=1 SV=1	HUMAN	9	0.5969	0.8145	0.7052	0.6392
4454	0.17	0.17	10.9	sp|Q99735|MGST2_HUMAN	Microsomal glutathione S-transferase 2 OS=Homo sapiens GN=MGST2 PE=1 SV=1	HUMAN	0	0.598	1.1159	0.4869	0.6399
4387	0.21	0.45	24.9	sp|Q9UQR1|ZN148_HUMAN	Zinc finger protein 148 OS=Homo sapiens GN=ZNF148 PE=1 SV=2	HUMAN	1	0.5982	1.0525	0.4412	0.6414
2689	3.82	4.46	27.7	sp|Q9NVC6|MED17_HUMAN	Mediator of RNA polymerase II transcription subunit 17 OS=Homo sapiens GN=MED17 PE=1 SV=2	HUMAN	2	0.5989	0.8511	0.6726	0.6431
4121	0.65	0.72	30.1	sp|Q6P179|ERAP2_HUMAN	Endoplasmic reticulum aminopeptidase 2 OS=Homo sapiens GN=ERAP2 PE=1 SV=2	HUMAN	1	0.5989	0.8573	0.7199	0.6461
3551	2	2.21	15.2	sp|Q9H1E5|TMX4_HUMAN	Thioredoxin-related transmembrane protein 4 OS=Homo sapiens GN=TMX4 PE=1 SV=1	HUMAN	1	0.6	0.4431	1.2745	0.6466
3607	2	2.08	32.6	sp|Q9Y305|ACOT9_HUMAN	Acyl-coenzyme A thioesterase 9, mitochondrial OS=Homo sapiens GN=ACOT9 PE=1 SV=2	HUMAN	1	0.6002	1.039	0.5331	0.6483
2364	4.36	5.02	31.9	sp|O95251|KAT7_HUMAN	Histone acetyltransferase KAT7 OS=Homo sapiens GN=KAT7 PE=1 SV=1	HUMAN	3	0.6033	0.5509	0.7609	0.6485
3191	2.09	2.3	31	sp|A6NC98|CC88B_HUMAN	Coiled-coil domain-containing protein 88B OS=Homo sapiens GN=CCDC88B PE=1 SV=1	HUMAN	1	0.6045	0.5256	1.0297	0.6485
3424	2.01	2.1	30	sp|Q9HAW4|CLSPN_HUMAN	Claspin OS=Homo sapiens GN=CLSPN PE=1 SV=3	HUMAN	1	0.605	0.6661	0.7076	0.6485
2339	4.47	4.53	57	sp|P17096|HMGA1_HUMAN	High mobility group protein HMG-I/HMG-Y OS=Homo sapiens GN=HMGA1 PE=1 SV=3	HUMAN	3	0.6057	0.8807	0.6658	0.6519
2925	2.79	2.84	54.7	sp|Q9Y2S6|TMA7_HUMAN	Translation machinery-associated protein 7 OS=Homo sapiens GN=TMA7 PE=1 SV=1	HUMAN	3	0.606	0.891	0.6171	0.652
3702	2	2.01	28.8	sp|Q7Z6P3|RAB44_HUMAN	Ras-related protein Rab-44 OS=Homo sapiens GN=RAB44 PE=3 SV=3	HUMAN	1	0.6064	1.4579	0.3586	0.6521
4382	0.22	0.27	35.2	sp|Q9NSC5|HOME3_HUMAN	Homer protein homolog 3 OS=Homo sapiens GN=HOMER3 PE=1 SV=2	HUMAN	0	0.6066	0.3099	2.1835	0.6522
3555	2	2.2	17.6	sp|P13473|LAMP2_HUMAN	Lysosome-associated membrane glycoprotein 2 OS=Homo sapiens GN=LAMP2 PE=1 SV=2	HUMAN	1	0.607	1.2006	0.3334	0.6525
2101	5.78	5.92	30.4	sp|Q9UID3|VPS51_HUMAN	Vacuolar protein sorting-associated protein 51 homolog OS=Homo sapiens GN=VPS51 PE=1 SV=2	HUMAN	3	0.6079	0.8592	0.5335	0.6526
4490	0.15	0.16	6.4	sp|Q8N680|ZBTB2_HUMAN	Zinc finger and BTB domain-containing protein 2 OS=Homo sapiens GN=ZBTB2 PE=1 SV=1	HUMAN	0	0.608	0.9525	0.5882	0.6531
2600	4	4.15	46.4	sp|P28074|PSB5_HUMAN	Proteasome subunit beta type-5 OS=Homo sapiens GN=PSMB5 PE=1 SV=3	HUMAN	5	0.6084	0.6888	0.6615	0.6544
38	84.72	85.53	86.7	sp|P68363|TBA1B_HUMAN	Tubulin alpha-1B chain OS=Homo sapiens GN=TUBA1B PE=1 SV=1	HUMAN	201	0.6091	0.8299	0.7005	0.6547
2774	3.44	3.74	27.4	sp|Q9Y4K1|AIM1_HUMAN	Absent in melanoma 1 protein OS=Homo sapiens GN=AIM1 PE=1 SV=3	HUMAN	2	0.6097	0.8376	0.8699	0.6556
1798	6.91	7.03	36.5	sp|P42768|WASP_HUMAN	Wiskott-Aldrich syndrome protein OS=Homo sapiens GN=WAS PE=1 SV=4	HUMAN	4	0.6101	0.8091	0.6533	0.6557
2714	3.71	3.77	35.5	sp|Q13287|NMI_HUMAN	N-myc-interactor OS=Homo sapiens GN=NMI PE=1 SV=2	HUMAN	3	0.6116	0.8133	0.8114	0.6565
333	28.68	30.36	74.8	sp|P31689|DNJA1_HUMAN	DnaJ homolog subfamily A member 1 OS=Homo sapiens GN=DNAJA1 PE=1 SV=2	HUMAN	22	0.6117	0.7232	0.6672	0.6577
3056	2.34	5.06	29.5	sp|O43639|NCK2_HUMAN	Cytoplasmic protein NCK2 OS=Homo sapiens GN=NCK2 PE=1 SV=2	HUMAN	2	0.6117	0.873	0.6205	0.6585
3717	2	2.01	14.5	sp|Q8N7R7|CCYL1_HUMAN	Cyclin-Y-like protein 1 OS=Homo sapiens GN=CCNYL1 PE=1 SV=2	HUMAN	1	0.6122	0.6446	0.5439	0.6595
5001	0.05	0.05	48.7	sp|O75596|CLC3A_HUMAN	C-type lectin domain family 3 member A OS=Homo sapiens GN=CLEC3A PE=1 SV=1	HUMAN	0	0.6123	0.8834	0.6065	0.6598
3659	2	2.03	30.3	sp|Q16854|DGUOK_HUMAN	Deoxyguanosine kinase, mitochondrial OS=Homo sapiens GN=DGUOK PE=1 SV=2	HUMAN	1	0.6133	0.9059	0.9008	0.6601
574	20.47	22.74	97.7	sp|P62328|TYB4_HUMAN	Thymosin beta-4 OS=Homo sapiens GN=TMSB4X PE=1 SV=2	HUMAN	21	0.6135	0.8856	0.7246	0.6601
2825	3.21	3.45	27.1	sp|Q9UP83|COG5_HUMAN	Conserved oligomeric Golgi complex subunit 5 OS=Homo sapiens GN=COG5 PE=1 SV=3	HUMAN	2	0.614	0.7587	0.4971	0.6602
4410	0.19	0.54	35.5	sp|P19876|CXCL3_HUMAN	C-X-C motif chemokine 3 OS=Homo sapiens GN=CXCL3 PE=1 SV=1	HUMAN	1	0.6141	1.0962	0.7195	0.6603
3803	1.77	1.86	49.8	sp|P05423|RPC4_HUMAN	DNA-directed RNA polymerase III subunit RPC4 OS=Homo sapiens GN=POLR3D PE=1 SV=2	HUMAN	1	0.6151	0.71	0.5967	0.6605
4030	0.9	0.94	19.7	sp|O60725|ICMT_HUMAN	Protein-S-isoprenylcysteine O-methyltransferase OS=Homo sapiens GN=ICMT PE=1 SV=1	HUMAN	1	0.6155	1.0092	0.668	0.6623
1274	10.52	10.64	64.6	sp|O60739|EIF1B_HUMAN	Eukaryotic translation initiation factor 1b OS=Homo sapiens GN=EIF1B PE=1 SV=2	HUMAN	9	0.6161	0.832	0.6917	0.6628
3640	2	2.05	15.3	sp|Q9NRW3|ABC3C_HUMAN	Probable DNA dC->dU-editing enzyme APOBEC-3C OS=Homo sapiens GN=APOBEC3C PE=1 SV=2	HUMAN	2	0.6164	1.5224	0.4811	0.6631
2373	4.33	4.37	30.9	sp|P31350|RIR2_HUMAN	Ribonucleoside-diphosphate reductase subunit M2 OS=Homo sapiens GN=RRM2 PE=1 SV=1	HUMAN	2	0.6173	0.596	0.6135	0.6636
3308	2.02	2.31	40.8	sp|Q04941|PLP2_HUMAN	Proteolipid protein 2 OS=Homo sapiens GN=PLP2 PE=1 SV=1	HUMAN	1	0.6184	0.6518	0.8428	0.6663
2536	4.01	4.69	27.5	sp|P35610|SOAT1_HUMAN	Sterol O-acyltransferase 1 OS=Homo sapiens GN=SOAT1 PE=1 SV=3	HUMAN	3	0.6185	0.759	0.6312	0.6664
2680	3.86	3.92	23.5	sp|Q9BYK8|PR285_HUMAN	Peroxisomal proliferator-activated receptor A-interacting complex 285 kDa protein OS=Homo sapiens GN=PRIC285 PE=1 SV=6	HUMAN	2	0.6188	0.8527	0.8172	0.6669
3713	2	2.01	41.9	sp|Q96FX7|TRM61_HUMAN	tRNA (adenine(58)-N(1))-methyltransferase catalytic subunit TRMT61A OS=Homo sapiens GN=TRMT61A PE=1 SV=1	HUMAN	1	0.6189	1.6906	0.3373	0.668
3950	1.15	1.44	32.2	sp|O00255|MEN1_HUMAN	Menin OS=Homo sapiens GN=MEN1 PE=1 SV=4	HUMAN	1	0.619	0.2588	1.0087	0.6687
3677	2	2.02	21	sp|Q96KA5|CLP1L_HUMAN	Cleft lip and palate transmembrane protein 1-like protein OS=Homo sapiens GN=CLPTM1L PE=1 SV=1	HUMAN	1	0.6199	0.6155	1.4945	0.6689
4482	0.15	0.27	44.9	sp|P17019|ZN708_HUMAN	Zinc finger protein 708 OS=Homo sapiens GN=ZNF708 PE=2 SV=4	HUMAN	0	0.6201	0.8305	0.9237	0.6702
3553	2	2.21	23.8	sp|Q9H5X1|FA96A_HUMAN	MIP18 family protein FAM96A OS=Homo sapiens GN=FAM96A PE=1 SV=1	HUMAN	1	0.6202	0.6388	0.9415	0.6703
3648	2	2.04	28	sp|Q6UXV4|APOOL_HUMAN	Apolipoprotein O-like OS=Homo sapiens GN=APOOL PE=1 SV=1	HUMAN	1	0.6205	0.2844	1.0642	0.6704
3852	1.59	1.64	36.8	sp|P60520|GBRL2_HUMAN	Gamma-aminobutyric acid receptor-associated protein-like 2 OS=Homo sapiens GN=GABARAPL2 PE=1 SV=1	HUMAN	1	0.6207	0.7806	0.6388	0.6705
3277	2.03	2.31	24.5	sp|Q9NUT2|ABCB8_HUMAN	ATP-binding cassette sub-family B member 8, mitochondrial OS=Homo sapiens GN=ABCB8 PE=1 SV=3	HUMAN	1	0.6208	0.8732	0.6086	0.671
3470	2	5.13	30.1	sp|Q9Y3L5|RAP2C_HUMAN	Ras-related protein Rap-2c OS=Homo sapiens GN=RAP2C PE=1 SV=1	HUMAN	3	0.6208	0.9168	0.7575	0.6712
3121	2.19	2.5	28	sp|O75164|KDM4A_HUMAN	Lysine-specific demethylase 4A OS=Homo sapiens GN=KDM4A PE=1 SV=2	HUMAN	1	0.6228	0.738	0.549	0.6726
592	20.22	21.16	39.9	sp|Q14444|CAPR1_HUMAN	Caprin-1 OS=Homo sapiens GN=CAPRIN1 PE=1 SV=2	HUMAN	21	0.6231	0.7437	0.699	0.6757
3492	2	2.44	18.8	sp|Q86YH6|DLP1_HUMAN	Decaprenyl-diphosphate synthase subunit 2 OS=Homo sapiens GN=PDSS2 PE=1 SV=2	HUMAN	1	0.6238	0.8385	0.632	0.676
1166	11.62	12.26	79	sp|P05114|HMGN1_HUMAN	Non-histone chromosomal protein HMG-14 OS=Homo sapiens GN=HMGN1 PE=1 SV=3	HUMAN	17	0.6247	1.0067	0.7498	0.6763
2797	3.35	3.65	22.6	sp|Q9UBB9|TFP11_HUMAN	Tuftelin-interacting protein 11 OS=Homo sapiens GN=TFIP11 PE=1 SV=1	HUMAN	2	0.6248	0.5069	0.7693	0.6764
859	15.36	16.45	61.2	sp|P40222|TXLNA_HUMAN	Alpha-taxilin OS=Homo sapiens GN=TXLNA PE=1 SV=3	HUMAN	9	0.6248	0.8817	0.6607	0.6766
2897	2.89	5.91	16.7	sp|Q8TB72|PUM2_HUMAN	Pumilio homolog 2 OS=Homo sapiens GN=PUM2 PE=1 SV=2	HUMAN	5	0.6252	0.8339	0.7049	0.6771
2433	4.13	4.36	39.9	sp|Q9UMZ2|SYNRG_HUMAN	Synergin gamma OS=Homo sapiens GN=SYNRG PE=1 SV=2	HUMAN	2	0.6256	1.0037	0.7713	0.6772
3088	2.27	2.29	42	sp|Q9NWV8|BABA1_HUMAN	BRISC and BRCA1-A complex member 1 OS=Homo sapiens GN=BABAM1 PE=1 SV=1	HUMAN	2	0.626	0.923	0.6759	0.6774
3764	1.92	2.03	12.5	sp|P15151|PVR_HUMAN	Poliovirus receptor OS=Homo sapiens GN=PVR PE=1 SV=2	HUMAN	1	0.6273	1.0499	0.8457	0.6779
2743	3.57	3.64	22.1	sp|O95864|FADS2_HUMAN	Fatty acid desaturase 2 OS=Homo sapiens GN=FADS2 PE=1 SV=1	HUMAN	2	0.6275	0.6774	0.4335	0.6781
2583	4	4.38	27.8	sp|Q05932|FOLC_HUMAN	Folylpolyglutamate synthase, mitochondrial OS=Homo sapiens GN=FPGS PE=1 SV=3	HUMAN	2	0.6276	0.7896	0.8341	0.6788
3883	1.46	1.83	28.4	sp|P32456|GBP2_HUMAN	Interferon-induced guanylate-binding protein 2 OS=Homo sapiens GN=GBP2 PE=1 SV=3	HUMAN	1	0.6284	0.6674	0.8029	0.6795
4927	0.05	0.36	26.8	sp|Q8WZA2|RPGF4_HUMAN	Rap guanine nucleotide exchange factor 4 OS=Homo sapiens GN=RAPGEF4 PE=1 SV=1	HUMAN	0	0.6295	0.9765	0.7057	0.6798
3453	2.01	2.02	24.6	sp|P60033|CD81_HUMAN	CD81 antigen OS=Homo sapiens GN=CD81 PE=1 SV=1	HUMAN	1	0.6296	0.712	0.8109	0.68
4279	0.33	0.39	36.4	RRRRRsp|Q04323|UBXN1_HUMAN	REVERSED UBX domain-containing protein 1 OS=Homo sapiens GN=UBXN1 PE=1 SV=2	HUMAN	1	0.6297	0.732	3.5	0.6807
2900	2.87	5.19	21.2	sp|Q9Y2L9|LRCH1_HUMAN	Leucine-rich repeat and calponin homology domain-containing protein 1 OS=Homo sapiens GN=LRCH1 PE=1 SV=3	HUMAN	3	0.6298	0.7383	0.6396	0.6814
4239	0.39	0.55	13.7	sp|Q86V21|AACS_HUMAN	Acetoacetyl-CoA synthetase OS=Homo sapiens GN=AACS PE=1 SV=1	HUMAN	1	0.6302	0.8881	0.3761	0.6828
4114	0.66	0.71	33.3	sp|Q8NB16|MLKL_HUMAN	Mixed lineage kinase domain-like protein OS=Homo sapiens GN=MLKL PE=1 SV=1	HUMAN	2	0.6315	0.4508	0.9466	0.6837
4296	0.31	0.37	20.8	sp|Q8TAF3|WDR48_HUMAN	WD repeat-containing protein 48 OS=Homo sapiens GN=WDR48 PE=1 SV=1	HUMAN	1	0.6317	0.3733	0.9659	0.6843
4320	0.28	0.52	19.6	sp|Q9BZQ6|EDEM3_HUMAN	ER degradation-enhancing alpha-mannosidase-like 3 OS=Homo sapiens GN=EDEM3 PE=1 SV=2	HUMAN	1	0.6318	0.9427	0.5709	0.6845
2701	3.76	3.78	56.4	sp|P18077|RL35A_HUMAN	60S ribosomal protein L35a OS=Homo sapiens GN=RPL35A PE=1 SV=2	HUMAN	4	0.6319	0.958	0.8339	0.6848
3301	2.02	2.6	24.9	sp|P56282|DPOE2_HUMAN	DNA polymerase epsilon subunit 2 OS=Homo sapiens GN=POLE2 PE=1 SV=2	HUMAN	1	0.6321	1.0826	0.9179	0.685
2944	2.7	2.82	16.2	sp|P36888|FLT3_HUMAN	Receptor-type tyrosine-protein kinase FLT3 OS=Homo sapiens GN=FLT3 PE=1 SV=2	HUMAN	2	0.6323	0.9039	0.5264	0.6852
2417	4.17	4.17	55.2	sp|Q99471|PFD5_HUMAN	Prefoldin subunit 5 OS=Homo sapiens GN=PFDN5 PE=1 SV=2	HUMAN	2	0.6323	0.8764	0.7557	0.6857
1843	6.61	7.2	38.5	sp|Q9Y320|TMX2_HUMAN	Thioredoxin-related transmembrane protein 2 OS=Homo sapiens GN=TMX2 PE=1 SV=1	HUMAN	5	0.6325	0.8854	0.7698	0.686
3679	2	2.02	31.9	sp|Q68D91|MBLC2_HUMAN	Metallo-beta-lactamase domain-containing protein 2 OS=Homo sapiens GN=MBLAC2 PE=1 SV=3	HUMAN	1	0.6326	0.7898	0.7712	0.6866
4044	0.87	0.89	10.7	sp|P15408|FOSL2_HUMAN	Fos-related antigen 2 OS=Homo sapiens GN=FOSL2 PE=1 SV=1	HUMAN	1	0.6329	0.7243	0.7855	0.6876
3676	2	2.02	44.4	sp|Q7LGA3|HS2ST_HUMAN	Heparan sulfate 2-O-sulfotransferase 1 OS=Homo sapiens GN=HS2ST1 PE=1 SV=1	HUMAN	1	0.6335	0.9016	0.89	0.6879
3994	1.02	1.02	6.7	sp|Q9NS18|GLRX2_HUMAN	Glutaredoxin-2, mitochondrial OS=Homo sapiens GN=GLRX2 PE=1 SV=1	HUMAN	1	0.6343	1.3678	0.2939	0.6888
2581	4	4.69	32.9	sp|Q9UHI6|DDX20_HUMAN	Probable ATP-dependent RNA helicase DDX20 OS=Homo sapiens GN=DDX20 PE=1 SV=2	HUMAN	2	0.635	0.8215	0.5277	0.6895
3286	2.03	2.11	11.7	sp|O75925|PIAS1_HUMAN	E3 SUMO-protein ligase PIAS1 OS=Homo sapiens GN=PIAS1 PE=1 SV=2	HUMAN	1	0.6357	0.8719	0.6201	0.6897
3099	2.23	3.01	31.4	sp|Q8IY18|SMC5_HUMAN	Structural maintenance of chromosomes protein 5 OS=Homo sapiens GN=SMC5 PE=1 SV=2	HUMAN	3	0.6358	0.6773	0.6438	0.6904
3052	2.35	2.62	23.8	sp|P62837|UB2D2_HUMAN	Ubiquitin-conjugating enzyme E2 D2 OS=Homo sapiens GN=UBE2D2 PE=1 SV=1	HUMAN	1	0.6358	0.7221	0.6903	0.6909
3715	2	2.01	34.4	sp|Q9Y2Y0|AR2BP_HUMAN	ADP-ribosylation factor-like protein 2-binding protein OS=Homo sapiens GN=ARL2BP PE=1 SV=1	HUMAN	1	0.6359	1.3786	1.1237	0.6911
3936	1.25	1.64	31.5	sp|Q9H582|ZN644_HUMAN	Zinc finger protein 644 OS=Homo sapiens GN=ZNF644 PE=1 SV=2	HUMAN	1	0.636	1.0495	0.7411	0.6922
2924	2.79	3.11	15.8	sp|Q96D71|REPS1_HUMAN	RalBP1-associated Eps domain-containing protein 1 OS=Homo sapiens GN=REPS1 PE=1 SV=3	HUMAN	2	0.6364	0.3018	1.4785	0.6923
2888	2.95	3.03	36.4	sp|P00813|ADA_HUMAN	Adenosine deaminase OS=Homo sapiens GN=ADA PE=1 SV=3	HUMAN	2	0.6366	1.0359	0.8021	0.6928
3887	1.44	3.75	21.3	sp|Q6V1X1|DPP8_HUMAN	Dipeptidyl peptidase 8 OS=Homo sapiens GN=DPP8 PE=1 SV=1	HUMAN	2	0.637	1.271	0.8184	0.6933
3418	2.01	2.13	29.5	sp|Q8IZT6|ASPM_HUMAN	Abnormal spindle-like microcephaly-associated protein OS=Homo sapiens GN=ASPM PE=1 SV=2	HUMAN	1	0.6373	0.3431	2.583	0.6936
3722	2	2.01	48.3	sp|Q16611|BAK_HUMAN	Bcl-2 homologous antagonist/killer OS=Homo sapiens GN=BAK1 PE=1 SV=1	HUMAN	1	0.6383	1.5886	0.9912	0.6939
2999	2.49	2.51	21.5	sp|O43516|WIPF1_HUMAN	WAS/WASL-interacting protein family member 1 OS=Homo sapiens GN=WIPF1 PE=1 SV=3	HUMAN	3	0.6384	0.9583	0.8066	0.6943
1833	6.67	7.09	55.8	sp|P84090|ERH_HUMAN	Enhancer of rudimentary homolog OS=Homo sapiens GN=ERH PE=1 SV=1	HUMAN	9	0.639	0.9853	0.7287	0.6948
3627	2	2.06	30.6	sp|Q96DZ1|ERLEC_HUMAN	Endoplasmic reticulum lectin 1 OS=Homo sapiens GN=ERLEC1 PE=1 SV=1	HUMAN	1	0.6394	0.7964	0.6379	0.6951
3581	2	2.13	60	sp|O00479|HMGN4_HUMAN	High mobility group nucleosome-binding domain-containing protein 4 OS=Homo sapiens GN=HMGN4 PE=1 SV=3	HUMAN	1	0.6401	0.8661	0.7683	0.6955
2865	3.04	6.77	66.3	sp|Q96FJ2|DYL2_HUMAN	Dynein light chain 2, cytoplasmic OS=Homo sapiens GN=DYNLL2 PE=1 SV=1	HUMAN	6	0.6414	0.7708	1.0018	0.6973
3069	2.31	2.42	30.2	sp|Q9UII2|ATIF1_HUMAN	ATPase inhibitor, mitochondrial OS=Homo sapiens GN=ATPIF1 PE=1 SV=1	HUMAN	1	0.6422	1.0921	0.7944	0.6978
2677	3.88	4.47	18.8	sp|O95248|MTMR5_HUMAN	Myotubularin-related protein 5 OS=Homo sapiens GN=SBF1 PE=1 SV=3	HUMAN	2	0.6429	1.132	1.0102	0.698
3183	2.1	2.18	21	sp|P14384|CBPM_HUMAN	Carboxypeptidase M OS=Homo sapiens GN=CPM PE=1 SV=2	HUMAN	1	0.643	0.6172	1.4193	0.698
1950	6.11	6.29	30	sp|Q9HC35|EMAL4_HUMAN	Echinoderm microtubule-associated protein-like 4 OS=Homo sapiens GN=EML4 PE=1 SV=3	HUMAN	3	0.6431	0.8752	0.9138	0.6991
3493	2	2.43	32.6	sp|P42331|RHG25_HUMAN	Rho GTPase-activating protein 25 OS=Homo sapiens GN=ARHGAP25 PE=1 SV=2	HUMAN	1	0.6437	0.7143	0.4494	0.6994
4342	0.25	0.41	34.8	sp|Q9HBE1|PATZ1_HUMAN	POZ-, AT hook-, and zinc finger-containing protein 1 OS=Homo sapiens GN=PATZ1 PE=1 SV=1	HUMAN	0	0.6437	1.0161	0.5103	0.6999
3669	2	2.03	45.8	sp|Q9NRG0|CHRC1_HUMAN	Chromatin accessibility complex protein 1 OS=Homo sapiens GN=CHRAC1 PE=1 SV=1	HUMAN	2	0.6437	0.91	0.7438	0.7005
3089	2.27	2.27	26.6	sp|P10301|RRAS_HUMAN	Ras-related protein R-Ras OS=Homo sapiens GN=RRAS PE=1 SV=1	HUMAN	2	0.6446	0.4064	8.1111	0.7011
3877	1.48	1.49	26.1	sp|Q9NX00|TM160_HUMAN	Transmembrane protein 160 OS=Homo sapiens GN=TMEM160 PE=2 SV=1	HUMAN	1	0.6448	0.9248	0.7003	0.7013
4596	0.11	0.24	47.2	sp|Q9NRX4|PHP14_HUMAN	14 kDa phosphohistidine phosphatase OS=Homo sapiens GN=PHPT1 PE=1 SV=1	HUMAN	2	0.6452	0.9031	0.5865	0.7019
307	30.73	33.51	46.4	sp|O75534|CSDE1_HUMAN	Cold shock domain-containing protein E1 OS=Homo sapiens GN=CSDE1 PE=1 SV=2	HUMAN	20	0.6456	0.7882	0.6664	0.7025
4115	0.66	0.7	29.3	sp|Q99442|SEC62_HUMAN	Translocation protein SEC62 OS=Homo sapiens GN=SEC62 PE=1 SV=1	HUMAN	1	0.6459	1.162	0.5199	0.7026
2803	3.31	3.34	52.7	sp|Q6P587|FAHD1_HUMAN	Acylpyruvase FAHD1, mitochondrial OS=Homo sapiens GN=FAHD1 PE=1 SV=2	HUMAN	3	0.6466	1.089	0.8857	0.7026
4576	0.11	2.8	22.3	sp|Q7Z7G8|VP13B_HUMAN	Vacuolar protein sorting-associated protein 13B OS=Homo sapiens GN=VPS13B PE=1 SV=2	HUMAN	4	0.6468	0.7251	0.7173	0.7027
2280	4.78	4.94	51.2	sp|Q9NX58|LYAR_HUMAN	Cell growth-regulating nucleolar protein OS=Homo sapiens GN=LYAR PE=1 SV=2	HUMAN	4	0.6468	1.0312	0.6597	0.703
3041	2.38	2.4	45.8	sp|P78537|BL1S1_HUMAN	Biogenesis of lysosome-related organelles complex 1 subunit 1 OS=Homo sapiens GN=BLOC1S1 PE=1 SV=2	HUMAN	1	0.6471	0.8883	0.828	0.7038
3180	2.1	2.46	35.8	sp|O75530|EED_HUMAN	Polycomb protein EED OS=Homo sapiens GN=EED PE=1 SV=2	HUMAN	1	0.6481	0.6438	0.9488	0.7044
3612	2	2.08	20.1	sp|Q02083|NAAA_HUMAN	N-acylethanolamine-hydrolyzing acid amidase OS=Homo sapiens GN=NAAA PE=1 SV=3	HUMAN	2	0.6485	1.2786	0.8964	0.7044
1768	7.08	7.56	44.6	sp|Q8NFF5|FAD1_HUMAN	FAD synthase OS=Homo sapiens GN=FLAD1 PE=1 SV=1	HUMAN	4	0.6487	1.0284	0.6865	0.7057
4679	0.09	0.13	13.8	sp|Q9NQL2|RRAGD_HUMAN	Ras-related GTP-binding protein D OS=Homo sapiens GN=RRAGD PE=1 SV=1	HUMAN	0	0.6505	1.0723	0.7725	0.7071
3415	2.01	2.17	30.8	sp|O95478|NSA2_HUMAN	Ribosome biogenesis protein NSA2 homolog OS=Homo sapiens GN=NSA2 PE=1 SV=1	HUMAN	1	0.6517	0.9029	0.7827	0.7072
2642	4	4.03	49.1	sp|O14548|COX7R_HUMAN	Cytochrome c oxidase subunit 7A-related protein, mitochondrial OS=Homo sapiens GN=COX7A2L PE=1 SV=2	HUMAN	2	0.6523	0.9157	0.6643	0.7075
4396	0.2	0.5	25.8	sp|Q56UN5|M3K19_HUMAN	Mitogen-activated protein kinase kinase kinase 19 OS=Homo sapiens GN=MAP3K19 PE=1 SV=1	HUMAN	0	0.6524	0.8694	1.072	0.7076
1474	8.91	9.76	36.2	sp|Q86U86|PB1_HUMAN	Protein polybromo-1 OS=Homo sapiens GN=PBRM1 PE=1 SV=1	HUMAN	6	0.6525	0.8725	0.6627	0.7082
1130	12.03	14.43	20	sp|Q9UMX0|UBQL1_HUMAN	Ubiquilin-1 OS=Homo sapiens GN=UBQLN1 PE=1 SV=2	HUMAN	10	0.653	0.8788	0.6662	0.7085
3007	2.47	2.96	51.2	sp|Q96E11|RRFM_HUMAN	Ribosome-recycling factor, mitochondrial OS=Homo sapiens GN=MRRF PE=1 SV=1	HUMAN	2	0.6531	0.9255	0.7493	0.7093
3712	2	2.01	32.8	sp|Q9P013|CWC15_HUMAN	Spliceosome-associated protein CWC15 homolog OS=Homo sapiens GN=CWC15 PE=1 SV=2	HUMAN	2	0.6538	0.9943	0.7102	0.7099
2335	4.48	5.04	21.2	sp|Q8IYB5|SMAP1_HUMAN	Stromal membrane-associated protein 1 OS=Homo sapiens GN=SMAP1 PE=1 SV=2	HUMAN	2	0.6542	0.8524	0.6651	0.7108
173	43.23	43.74	74.9	sp|P09429|HMGB1_HUMAN	High mobility group protein B1 OS=Homo sapiens GN=HMGB1 PE=1 SV=3	HUMAN	43	0.6546	0.9394	0.7773	0.7113
2112	5.71	6.06	39.7	sp|Q9Y6M9|NDUB9_HUMAN	NADH dehydrogenase [ubiquinone] 1 beta subcomplex subunit 9 OS=Homo sapiens GN=NDUFB9 PE=1 SV=3	HUMAN	4	0.6548	0.8527	0.7883	0.712
3306	2.02	2.32	29.3	sp|Q9H1H9|KI13A_HUMAN	Kinesin-like protein KIF13A OS=Homo sapiens GN=KIF13A PE=1 SV=2	HUMAN	1	0.6552	1.1826	0.797	0.7137
3969	1.09	1.27	43	sp|Q9BUP3|HTAI2_HUMAN	Oxidoreductase HTATIP2 OS=Homo sapiens GN=HTATIP2 PE=1 SV=2	HUMAN	2	0.6556	0.8451	0.7768	0.7138
3992	1.02	1.06	22.9	sp|Q8N6T3|ARFG1_HUMAN	ADP-ribosylation factor GTPase-activating protein 1 OS=Homo sapiens GN=ARFGAP1 PE=1 SV=2	HUMAN	3	0.6579	0.9444	0.6212	0.7139
1990	6.04	6.22	40.3	sp|P06132|DCUP_HUMAN	Uroporphyrinogen decarboxylase OS=Homo sapiens GN=UROD PE=1 SV=2	HUMAN	6	0.6588	0.7797	0.9804	0.7142
3655	2	2.03	39.8	sp|Q9P031|TAP26_HUMAN	Thyroid transcription factor 1-associated protein 26 OS=Homo sapiens GN=CCDC59 PE=1 SV=2	HUMAN	1	0.6589	0.8689	0.8229	0.7144
3158	2.13	3.03	44.8	sp|P86791|CCZ1_HUMAN	Vacuolar fusion protein CCZ1 homolog OS=Homo sapiens GN=CCZ1 PE=1 SV=1	HUMAN	3	0.6592	1.4158	0.6568	0.7145
740	17.35	17.97	88.3	sp|Q9BV57|MTND_HUMAN	1,2-dihydroxy-3-keto-5-methylthiopentene dioxygenase OS=Homo sapiens GN=ADI1 PE=1 SV=1	HUMAN	13	0.6593	0.7605	0.637	0.7152
2946	2.69	2.78	24	sp|Q9P035|HACD3_HUMAN	Very-long-chain (3R)-3-hydroxyacyl-[acyl-carrier protein] dehydratase 3 OS=Homo sapiens GN=PTPLAD1 PE=1 SV=2	HUMAN	2	0.6595	0.9774	0.6106	0.7154
2322	4.59	4.61	26.9	sp|O75886|STAM2_HUMAN	Signal transducing adapter molecule 2 OS=Homo sapiens GN=STAM2 PE=1 SV=1	HUMAN	3	0.6597	0.9389	0.636	0.716
1417	9.4	12.2	39.1	sp|P06400|RB_HUMAN	Retinoblastoma-associated protein OS=Homo sapiens GN=RB1 PE=1 SV=2	HUMAN	6	0.6601	0.777	0.673	0.7168
3219	2.06	2.61	33.6	sp|Q9HCG8|CWC22_HUMAN	Pre-mRNA-splicing factor CWC22 homolog OS=Homo sapiens GN=CWC22 PE=1 SV=3	HUMAN	2	0.6602	0.8813	0.834	0.7176
1384	9.74	10.6	38.9	sp|Q02252|MMSA_HUMAN	Methylmalonate-semialdehyde dehydrogenase [acylating], mitochondrial OS=Homo sapiens GN=ALDH6A1 PE=1 SV=2	HUMAN	7	0.6607	0.8985	0.7136	0.7189
2218	5.12	8.14	36.6	sp|Q6PGP7|TTC37_HUMAN	Tetratricopeptide repeat protein 37 OS=Homo sapiens GN=TTC37 PE=1 SV=1	HUMAN	4	0.6619	1.0647	0.7394	0.7191
3268	2.03	2.43	33.2	sp|Q13415|ORC1_HUMAN	Origin recognition complex subunit 1 OS=Homo sapiens GN=ORC1 PE=1 SV=2	HUMAN	1	0.6622	0.9539	0.671	0.7199
2686	3.85	3.88	36.9	sp|Q9Y4H4|GPSM3_HUMAN	G-protein-signaling modulator 3 OS=Homo sapiens GN=GPSM3 PE=1 SV=1	HUMAN	2	0.6622	0.8091	0.995	0.7208
2396	4.24	4.61	48.3	sp|O15226|NKRF_HUMAN	NF-kappa-B-repressing factor OS=Homo sapiens GN=NKRF PE=1 SV=2	HUMAN	2	0.6632	1.176	0.7085	0.721
1879	6.4	6.4	47.6	sp|A6NHT5|HMX3_HUMAN	Homeobox protein HMX3 OS=Homo sapiens GN=HMX3 PE=2 SV=1	HUMAN	5	0.6634	1.4824	0.5132	0.7211
4816	0.06	0.54	45.3	RRRRRsp|P35579|MYH9_HUMAN	REVERSED Myosin-9 OS=Homo sapiens GN=MYH9 PE=1 SV=4	HUMAN	1	0.6635	0.8371	5.9024	0.7215
2046	6	6.08	30.4	sp|Q9BZV1|UBXN6_HUMAN	UBX domain-containing protein 6 OS=Homo sapiens GN=UBXN6 PE=1 SV=1	HUMAN	3	0.6636	0.8977	0.8237	0.7217
3030	2.41	2.47	37.7	sp|A2VDF0|FUCM_HUMAN	Fucose mutarotase OS=Homo sapiens GN=FUOM PE=1 SV=2	HUMAN	3	0.664	0.6778	0.8461	0.7233
3098	2.24	2.28	15.3	sp|Q96FN4|CPNE2_HUMAN	Copine-2 OS=Homo sapiens GN=CPNE2 PE=1 SV=3	HUMAN	1	0.664	1.1843	0.788	0.7235
3895	1.42	1.44	22.6	sp|Q9NUI1|DECR2_HUMAN	Peroxisomal 2,4-dienoyl-CoA reductase OS=Homo sapiens GN=DECR2 PE=1 SV=1	HUMAN	3	0.6641	0.7221	0.7351	0.7236
4073	0.78	0.82	33.7	sp|Q9UHA3|RLP24_HUMAN	Probable ribosome biogenesis protein RLP24 OS=Homo sapiens GN=RSL24D1 PE=1 SV=1	HUMAN	1	0.6641	0.7935	0.8683	0.724
3063	2.32	2.6	21	sp|O95429|BAG4_HUMAN	BAG family molecular chaperone regulator 4 OS=Homo sapiens GN=BAG4 PE=1 SV=1	HUMAN	2	0.6643	0.7256	0.9302	0.7244
1503	8.68	8.76	42.2	sp|Q99436|PSB7_HUMAN	Proteasome subunit beta type-7 OS=Homo sapiens GN=PSMB7 PE=1 SV=1	HUMAN	6	0.665	0.8957	0.6798	0.7249
3608	2	2.08	34.7	sp|Q9HBI0|PARVG_HUMAN	Gamma-parvin OS=Homo sapiens GN=PARVG PE=2 SV=1	HUMAN	1	0.6651	0.8716	0.5701	0.7251
1589	8.13	8.36	52.9	sp|Q53GQ0|DHB12_HUMAN	Estradiol 17-beta-dehydrogenase 12 OS=Homo sapiens GN=HSD17B12 PE=1 SV=2	HUMAN	4	0.6651	0.938	0.7992	0.7252
4865	0.06	0.11	8.4	sp|Q9H334|FOXP1_HUMAN	Forkhead box protein P1 OS=Homo sapiens GN=FOXP1 PE=1 SV=1	HUMAN	0	0.6654	0.7333	0.6853	0.7271
2827	3.19	3.2	61.2	sp|Q7Z4G1|COMD6_HUMAN	COMM domain-containing protein 6 OS=Homo sapiens GN=COMMD6 PE=1 SV=1	HUMAN	2	0.6654	1.0073	0.7163	0.7274
1699	7.59	7.8	35.6	sp|Q9NPF5|DMAP1_HUMAN	DNA methyltransferase 1-associated protein 1 OS=Homo sapiens GN=DMAP1 PE=1 SV=1	HUMAN	5	0.6659	0.7124	0.8424	0.7275
1551	8.34	8.54	71.9	sp|P63167|DYL1_HUMAN	Dynein light chain 1, cytoplasmic OS=Homo sapiens GN=DYNLL1 PE=1 SV=1	HUMAN	11	0.666	0.8983	0.7434	0.7276
3940	1.23	1.43	24.6	sp|Q8WUR7|CO040_HUMAN	UPF0235 protein C15orf40 OS=Homo sapiens GN=C15orf40 PE=1 SV=1	HUMAN	1	0.6661	0.6108	0.8487	0.7287
2036	6	6.59	28.9	sp|P78318|IGBP1_HUMAN	Immunoglobulin-binding protein 1 OS=Homo sapiens GN=IGBP1 PE=1 SV=1	HUMAN	3	0.6668	0.8116	0.8122	0.7293
3666	2	2.03	41.6	sp|Q9H204|MED28_HUMAN	Mediator of RNA polymerase II transcription subunit 28 OS=Homo sapiens GN=MED28 PE=1 SV=1	HUMAN	2	0.667	0.7881	0.7691	0.7296
2823	3.22	3.47	36.3	sp|P82094|TMF1_HUMAN	TATA element modulatory factor OS=Homo sapiens GN=TMF1 PE=1 SV=2	HUMAN	2	0.6676	0.8055	0.7624	0.7298
1793	6.93	7.13	25.5	sp|Q96AY4|TTC28_HUMAN	Tetratricopeptide repeat protein 28 OS=Homo sapiens GN=TTC28 PE=1 SV=4	HUMAN	4	0.6685	0.7658	0.5654	0.73
4117	0.65	0.98	24	sp|Q16254|E2F4_HUMAN	Transcription factor E2F4 OS=Homo sapiens GN=E2F4 PE=1 SV=2	HUMAN	2	0.6685	1.2256	0.636	0.7302
3905	1.37	1.45	47.1	sp|Q8N4H5|TOM5_HUMAN	Mitochondrial import receptor subunit TOM5 homolog OS=Homo sapiens GN=TOMM5 PE=1 SV=1	HUMAN	1	0.6686	0.5928	1.0392	0.7305
3765	1.92	2.03	17.9	sp|Q03405|UPAR_HUMAN	Urokinase plasminogen activator surface receptor OS=Homo sapiens GN=PLAUR PE=1 SV=1	HUMAN	1	0.6688	0.7787	0.7861	0.7311
3241	2.05	2.08	21.3	sp|Q96G21|IMP4_HUMAN	U3 small nucleolar ribonucleoprotein protein IMP4 OS=Homo sapiens GN=IMP4 PE=1 SV=1	HUMAN	1	0.669	0.8185	0.679	0.7314
2839	3.13	3.39	38.2	sp|O95456|PSMG1_HUMAN	Proteasome assembly chaperone 1 OS=Homo sapiens GN=PSMG1 PE=1 SV=1	HUMAN	4	0.669	0.5422	1.0748	0.7333
909	14.69	14.77	56	sp|Q13547|HDAC1_HUMAN	Histone deacetylase 1 OS=Homo sapiens GN=HDAC1 PE=1 SV=1	HUMAN	17	0.6691	0.87	0.7111	0.7347
1573	8.2	11.34	52.5	sp|O43447|PPIH_HUMAN	Peptidyl-prolyl cis-trans isomerase H OS=Homo sapiens GN=PPIH PE=1 SV=1	HUMAN	6	0.67	0.8428	0.8637	0.735
3755	2	2	13.8	sp|P49459|UBE2A_HUMAN	Ubiquitin-conjugating enzyme E2 A OS=Homo sapiens GN=UBE2A PE=1 SV=2	HUMAN	2	0.6701	1.0254	0.8171	0.7352
1920	6.2	6.45	44.8	sp|Q13501|SQSTM_HUMAN	Sequestosome-1 OS=Homo sapiens GN=SQSTM1 PE=1 SV=1	HUMAN	6	0.6709	0.8579	0.7337	0.7353
309	30.53	35.63	92.1	sp|O60814|H2B1K_HUMAN	Histone H2B type 1-K OS=Homo sapiens GN=HIST1H2BK PE=1 SV=3	HUMAN	92	0.671	0.9251	0.7277	0.7355
2187	5.29	5.52	50.6	sp|P31937|3HIDH_HUMAN	3-hydroxyisobutyrate dehydrogenase, mitochondrial OS=Homo sapiens GN=HIBADH PE=1 SV=2	HUMAN	5	0.6714	0.8875	0.7954	0.7356
1365	9.91	10.04	32.5	sp|P49840|GSK3A_HUMAN	Glycogen synthase kinase-3 alpha OS=Homo sapiens GN=GSK3A PE=1 SV=2	HUMAN	6	0.6715	0.7572	0.5986	0.7358
4392	0.21	0.22	19.7	sp|P02794|FRIH_HUMAN	Ferritin heavy chain OS=Homo sapiens GN=FTH1 PE=1 SV=2	HUMAN	0	0.6715	0.9057	0.8725	0.7367
1326	10.1	27	52.5	sp|P09972|ALDOC_HUMAN	Fructose-bisphosphate aldolase C OS=Homo sapiens GN=ALDOC PE=1 SV=2	HUMAN	47	0.6722	0.6808	0.8227	0.7368
2950	2.67	2.71	42.1	sp|Q9Y3C1|NOP16_HUMAN	Nucleolar protein 16 OS=Homo sapiens GN=NOP16 PE=1 SV=2	HUMAN	2	0.6724	0.8418	0.8018	0.7368
39	84	85.89	89.7	sp|P08670|VIME_HUMAN	Vimentin OS=Homo sapiens GN=VIM PE=1 SV=4	HUMAN	94	0.6726	0.8121	0.8203	0.7373
3199	2.08	2.26	35.6	sp|Q6PCB5|RSBNL_HUMAN	Round spermatid basic protein 1-like protein OS=Homo sapiens GN=RSBN1L PE=1 SV=2	HUMAN	2	0.6728	0.7057	0.7612	0.7375
2503	4.03	4.62	25.7	sp|Q5C9Z4|NOM1_HUMAN	Nucleolar MIF4G domain-containing protein 1 OS=Homo sapiens GN=NOM1 PE=1 SV=1	HUMAN	2	0.6729	0.8777	0.6351	0.7386
3750	2	2	28.6	sp|Q9HD34|LYRM4_HUMAN	LYR motif-containing protein 4 OS=Homo sapiens GN=LYRM4 PE=1 SV=1	HUMAN	1	0.6734	0.7403	1.1571	0.7387
4091	0.72	1.1	41.1	sp|P61966|AP1S1_HUMAN	AP-1 complex subunit sigma-1A OS=Homo sapiens GN=AP1S1 PE=1 SV=1	HUMAN	2	0.6734	2.2992	0.7319	0.7397
2277	4.79	5.1	26.6	sp|O00221|IKBE_HUMAN	NF-kappa-B inhibitor epsilon OS=Homo sapiens GN=NFKBIE PE=1 SV=3	HUMAN	3	0.6737	0.6192	0.7961	0.7397
2573	4	7.28	30.3	sp|Q6P2H3|CEP85_HUMAN	Centrosomal protein of 85 kDa OS=Homo sapiens GN=CEP85 PE=1 SV=1	HUMAN	3	0.6739	1.0737	0.7842	0.7398
2963	2.6	2.98	40.5	sp|O75410|TACC1_HUMAN	Transforming acidic coiled-coil-containing protein 1 OS=Homo sapiens GN=TACC1 PE=1 SV=2	HUMAN	2	0.6741	0.6728	0.7162	0.7398
2304	4.7	4.84	61.6	sp|O95721|SNP29_HUMAN	Synaptosomal-associated protein 29 OS=Homo sapiens GN=SNAP29 PE=1 SV=1	HUMAN	4	0.6744	0.7662	0.8126	0.7399
4415	0.19	0.25	31.1	sp|O75787|RENR_HUMAN	Renin receptor OS=Homo sapiens GN=ATP6AP2 PE=1 SV=2	HUMAN	0	0.6745	1.5491	0.5074	0.74
3508	2	2.38	49.9	sp|Q96L58|B3GT6_HUMAN	Beta-1,3-galactosyltransferase 6 OS=Homo sapiens GN=B3GALT6 PE=2 SV=2	HUMAN	1	0.6745	1.2174	2.1548	0.7416
155	45.72	46.89	63.8	sp|P60842|IF4A1_HUMAN	Eukaryotic initiation factor 4A-I OS=Homo sapiens GN=EIF4A1 PE=1 SV=1	HUMAN	46	0.6751	0.8476	0.7531	0.7417
3214	2.07	2.09	12.8	sp|Q8WV99|ZFN2B_HUMAN	AN1-type zinc finger protein 2B OS=Homo sapiens GN=ZFAND2B PE=1 SV=1	HUMAN	2	0.6751	0.784	0.8409	0.7419
3661	2	2.03	33	sp|Q92520|FAM3C_HUMAN	Protein FAM3C OS=Homo sapiens GN=FAM3C PE=1 SV=1	HUMAN	1	0.6757	0.689	0.97	0.742
2632	4	4.03	28.2	sp|Q9NP66|HM20A_HUMAN	High mobility group protein 20A OS=Homo sapiens GN=HMG20A PE=1 SV=1	HUMAN	3	0.6765	0.8396	0.7505	0.743
2431	4.13	8.6	43.1	sp|P25440|BRD2_HUMAN	Bromodomain-containing protein 2 OS=Homo sapiens GN=BRD2 PE=1 SV=2	HUMAN	5	0.6767	1.0589	0.7616	0.7434
563	20.83	24.97	64.5	sp|Q99729|ROAA_HUMAN	Heterogeneous nuclear ribonucleoprotein A/B OS=Homo sapiens GN=HNRNPAB PE=1 SV=2	HUMAN	20	0.6768	0.8996	0.786	0.7435
660	18.68	20.17	60.6	sp|P06493|CDK1_HUMAN	Cyclin-dependent kinase 1 OS=Homo sapiens GN=CDK1 PE=1 SV=3	HUMAN	13	0.6769	0.8512	0.7138	0.7444
2909	2.85	3.03	30.8	sp|Q9NUW8|TYDP1_HUMAN	Tyrosyl-DNA phosphodiesterase 1 OS=Homo sapiens GN=TDP1 PE=1 SV=2	HUMAN	3	0.677	1.0237	0.8273	0.7455
4072	0.78	0.85	19.7	sp|Q5BKT4|AG10A_HUMAN	Dol-P-Glc:Glc(2)Man(9)GlcNAc(2)-PP-Dol alpha-1,2-glucosyltransferase OS=Homo sapiens GN=ALG10 PE=1 SV=1	HUMAN	1	0.6785	0.9288	0.9175	0.7461
2079	5.9	5.91	37.9	sp|Q9Y2B0|CNPY2_HUMAN	Protein canopy homolog 2 OS=Homo sapiens GN=CNPY2 PE=1 SV=1	HUMAN	5	0.6792	0.7829	0.8904	0.7461
4134	0.61	0.83	24.6	sp|Q53R41|FAKD1_HUMAN	FAST kinase domain-containing protein 1 OS=Homo sapiens GN=FASTKD1 PE=1 SV=1	HUMAN	1	0.6816	1.0165	0.9393	0.7471
4943	0.05	0.24	13.5	RRRRRsp|Q14674|ESPL1_HUMAN	REVERSED Separin OS=Homo sapiens GN=ESPL1 PE=1 SV=3	HUMAN	0	0.6821	0.7008	0.9087	0.7477
3947	1.17	1.62	30.5	sp|Q8WXI9|P66B_HUMAN	Transcriptional repressor p66-beta OS=Homo sapiens GN=GATAD2B PE=1 SV=1	HUMAN	2	0.6821	0.7936	0.8293	0.748
4093	0.71	0.99	17.3	sp|Q9BVJ7|DUS23_HUMAN	Dual specificity protein phosphatase 23 OS=Homo sapiens GN=DUSP23 PE=1 SV=1	HUMAN	1	0.6827	0.6994	1.3899	0.7482
1937	6.15	6.16	57.4	sp|O00244|ATOX1_HUMAN	Copper transport protein ATOX1 OS=Homo sapiens GN=ATOX1 PE=1 SV=1	HUMAN	5	0.6832	0.9961	0.7146	0.7485
3861	1.54	1.76	33	sp|O43566|RGS14_HUMAN	Regulator of G-protein signaling 14 OS=Homo sapiens GN=RGS14 PE=1 SV=4	HUMAN	2	0.6833	0.6047	0.8187	0.7486
923	14.49	14.96	44	sp|P35527|K1C9_HUMAN	Keratin, type I cytoskeletal 9 OS=Homo sapiens GN=KRT9 PE=1 SV=3	HUMAN	11	0.6834	0.9767	0.8004	0.7489
4188	0.48	2.31	29.6	sp|Q16644|MAPK3_HUMAN	MAP kinase-activated protein kinase 3 OS=Homo sapiens GN=MAPKAPK3 PE=1 SV=1	HUMAN	3	0.6839	0.8756	0.8238	0.7491
3147	2.15	2.32	28	sp|Q9NQZ2|SAS10_HUMAN	Something about silencing protein 10 OS=Homo sapiens GN=UTP3 PE=1 SV=1	HUMAN	2	0.6842	0.7674	1.2271	0.7497
3983	1.05	1.06	44.8	sp|P00167|CYB5_HUMAN	Cytochrome b5 OS=Homo sapiens GN=CYB5A PE=1 SV=2	HUMAN	2	0.6844	0.9419	0.589	0.7497
4892	0.06	0.07	12.8	sp|P19256|LFA3_HUMAN	Lymphocyte function-associated antigen 3 OS=Homo sapiens GN=CD58 PE=1 SV=1	HUMAN	0	0.6847	1.1495	0.8287	0.7501
2210	5.16	5.33	46.4	sp|Q8ND56|LS14A_HUMAN	Protein LSM14 homolog A OS=Homo sapiens GN=LSM14A PE=1 SV=3	HUMAN	4	0.6848	0.8681	0.8493	0.7504
2509	4.03	4.09	25	sp|Q8WUX2|CHAC2_HUMAN	Cation transport regulator-like protein 2 OS=Homo sapiens GN=CHAC2 PE=2 SV=1	HUMAN	2	0.6849	0.808	0.6848	0.7512
3614	2	2.07	28.1	sp|Q6UWE0|LRSM1_HUMAN	E3 ubiquitin-protein ligase LRSAM1 OS=Homo sapiens GN=LRSAM1 PE=1 SV=1	HUMAN	1	0.6849	1.6749	0.4081	0.7518
2624	4	4.04	52.3	sp|Q96F24|NRBF2_HUMAN	Nuclear receptor-binding factor 2 OS=Homo sapiens GN=NRBF2 PE=1 SV=1	HUMAN	2	0.6852	0.4357	0.8204	0.752
3031	2.4	8.84	55.6	sp|O14602|IF1AY_HUMAN	Eukaryotic translation initiation factor 1A, Y-chromosomal OS=Homo sapiens GN=EIF1AY PE=1 SV=4	HUMAN	5	0.6853	0.7851	0.7301	0.752
4663	0.09	0.32	32.9	sp|Q86SZ2|TPC6B_HUMAN	Trafficking protein particle complex subunit 6B OS=Homo sapiens GN=TRAPPC6B PE=1 SV=1	HUMAN	0	0.6853	0.8027	0.8276	0.7522
4476	0.15	0.29	13.8	sp|Q4ADV7|RIC1_HUMAN	Protein RIC1 homolog OS=Homo sapiens GN=KIAA1432 PE=1 SV=2	HUMAN	0	0.6855	0.6912	0.6853	0.7526
1093	12.43	13.26	31.6	sp|Q0VD83|APOBR_HUMAN	Apolipoprotein B receptor OS=Homo sapiens GN=APOBR PE=1 SV=1	HUMAN	8	0.6856	0.8158	0.6671	0.7534
2592	4	4.26	21.6	sp|P49441|INPP_HUMAN	Inositol polyphosphate 1-phosphatase OS=Homo sapiens GN=INPP1 PE=1 SV=1	HUMAN	2	0.6856	0.6986	0.8041	0.7537
446	24.2	25.02	43.3	sp|O76021|RL1D1_HUMAN	Ribosomal L1 domain-containing protein 1 OS=Homo sapiens GN=RSL1D1 PE=1 SV=3	HUMAN	21	0.6858	0.9102	0.7517	0.754
3108	2.21	2.34	23.5	sp|Q8TE77|SSH3_HUMAN	Protein phosphatase Slingshot homolog 3 OS=Homo sapiens GN=SSH3 PE=1 SV=2	HUMAN	1	0.6858	1.186	1.6584	0.7542
2889	2.95	2.99	47.5	sp|Q96GX9|MTNB_HUMAN	Probable methylthioribulose-1-phosphate dehydratase OS=Homo sapiens GN=APIP PE=1 SV=1	HUMAN	3	0.6859	0.806	0.75	0.7543
3262	2.03	5.44	31.1	sp|Q8NB90|SPAT5_HUMAN	Spermatogenesis-associated protein 5 OS=Homo sapiens GN=SPATA5 PE=1 SV=3	HUMAN	2	0.6862	1.0946	0.7808	0.7548
1579	8.18	8.2	64.8	sp|Q9UI30|TR112_HUMAN	tRNA methyltransferase 112 homolog OS=Homo sapiens GN=TRMT112 PE=1 SV=1	HUMAN	7	0.6866	0.8919	0.7867	0.7553
3082	2.28	2.5	30.5	sp|Q8TC12|RDH11_HUMAN	Retinol dehydrogenase 11 OS=Homo sapiens GN=RDH11 PE=1 SV=2	HUMAN	1	0.6867	1.0744	0.5094	0.7559
3518	2	2.32	23.6	sp|Q9BYI3|HYCCI_HUMAN	Hyccin OS=Homo sapiens GN=FAM126A PE=1 SV=2	HUMAN	1	0.6874	0.9799	0.492	0.756
1610	8.03	25.88	51.1	sp|Q16576|RBBP7_HUMAN	Histone-binding protein RBBP7 OS=Homo sapiens GN=RBBP7 PE=1 SV=1	HUMAN	21	0.6874	0.9053	0.7311	0.7562
2702	3.75	3.79	38.1	sp|Q9BRG1|VPS25_HUMAN	Vacuolar protein-sorting-associated protein 25 OS=Homo sapiens GN=VPS25 PE=1 SV=1	HUMAN	3	0.6876	1.0135	0.7301	0.7564
4575	0.12	0.12	24.4	sp|P62072|TIM10_HUMAN	Mitochondrial import inner membrane translocase subunit Tim10 OS=Homo sapiens GN=TIMM10 PE=1 SV=1	HUMAN	0	0.6888	0.8611	0.7699	0.757
1898	6.29	7.26	43.2	sp|P20810|ICAL_HUMAN	Calpastatin OS=Homo sapiens GN=CAST PE=1 SV=4	HUMAN	5	0.689	0.8919	0.8154	0.757
1884	6.36	6.53	24.9	sp|Q9P265|DIP2B_HUMAN	Disco-interacting protein 2 homolog B OS=Homo sapiens GN=DIP2B PE=1 SV=3	HUMAN	6	0.6894	0.7845	0.8172	0.7572
435	24.7	25.18	37.9	sp|Q14157|UBP2L_HUMAN	Ubiquitin-associated protein 2-like OS=Homo sapiens GN=UBAP2L PE=1 SV=2	HUMAN	21	0.6895	0.8862	0.7075	0.7578
1070	12.67	13.57	44	sp|Q13123|RED_HUMAN	Protein Red OS=Homo sapiens GN=IK PE=1 SV=3	HUMAN	8	0.6903	0.8483	0.7624	0.7581
4169	0.53	0.53	10.7	sp|Q6ICB0|DESI1_HUMAN	Desumoylating isopeptidase 1 OS=Homo sapiens GN=DESI1 PE=1 SV=1	HUMAN	1	0.6905	1.0495	0.66	0.7584
3862	1.53	1.79	43.9	sp|Q8TBA6|GOGA5_HUMAN	Golgin subfamily A member 5 OS=Homo sapiens GN=GOLGA5 PE=1 SV=3	HUMAN	1	0.6905	1.151	0.7047	0.7587
2033	6	6.86	37.8	sp|Q9UNF1|MAGD2_HUMAN	Melanoma-associated antigen D2 OS=Homo sapiens GN=MAGED2 PE=1 SV=2	HUMAN	3	0.691	0.5972	0.7778	0.7592
2196	5.21	5.77	34.7	sp|O95613|PCNT_HUMAN	Pericentrin OS=Homo sapiens GN=PCNT PE=1 SV=4	HUMAN	6	0.6914	0.7674	0.5964	0.7601
3849	1.59	2.6	43.2	sp|Q96NC0|ZMAT2_HUMAN	Zinc finger matrin-type protein 2 OS=Homo sapiens GN=ZMAT2 PE=1 SV=1	HUMAN	3	0.6918	0.8496	1.0057	0.7611
4070	0.78	5.17	26.1	sp|Q9Y2H1|ST38L_HUMAN	Serine/threonine-protein kinase 38-like OS=Homo sapiens GN=STK38L PE=1 SV=3	HUMAN	3	0.6922	0.9547	0.5423	0.7615
2911	2.84	2.87	32	sp|Q6PL24|TMED8_HUMAN	Protein TMED8 OS=Homo sapiens GN=TMED8 PE=1 SV=1	HUMAN	3	0.6927	0.6678	0.9149	0.7617
2537	4.01	4.57	31	sp|Q8ND24|RN214_HUMAN	RING finger protein 214 OS=Homo sapiens GN=RNF214 PE=1 SV=2	HUMAN	2	0.6939	0.6983	0.7209	0.762
2275	4.81	5.4	43	sp|Q8N6M0|OTU6B_HUMAN	OTU domain-containing protein 6B OS=Homo sapiens GN=OTUD6B PE=1 SV=1	HUMAN	3	0.6941	0.8426	0.7872	0.7621
2786	3.39	3.42	83.3	sp|P52434|RPAB3_HUMAN	DNA-directed RNA polymerases I, II, and III subunit RPABC3 OS=Homo sapiens GN=POLR2H PE=1 SV=4	HUMAN	4	0.6944	0.7864	0.8012	0.7625
3756	2	2	19.5	sp|Q9NYJ1|COA4_HUMAN	Cytochrome c oxidase assembly factor 4 homolog, mitochondrial OS=Homo sapiens GN=COA4 PE=1 SV=2	HUMAN	1	0.6945	0.7919	0.8701	0.7629
1796	6.92	7.5	22.1	sp|Q8N3C0|ASCC3_HUMAN	Activating signal cointegrator 1 complex subunit 3 OS=Homo sapiens GN=ASCC3 PE=1 SV=3	HUMAN	5	0.6946	0.8952	0.7429	0.7635
2847	3.1	3.32	33.5	sp|Q9BQ61|CS043_HUMAN	Uncharacterized protein C19orf43 OS=Homo sapiens GN=C19orf43 PE=1 SV=1	HUMAN	2	0.6949	0.8215	0.9261	0.765
2978	2.56	2.98	22.9	sp|Q9Y3T6|R3HC1_HUMAN	R3H and coiled-coil domain-containing protein 1 OS=Homo sapiens GN=R3HCC1 PE=1 SV=2	HUMAN	2	0.6949	2.1044	0.5514	0.7657
222	38.51	40.01	44.6	sp|Q04637|IF4G1_HUMAN	Eukaryotic translation initiation factor 4 gamma 1 OS=Homo sapiens GN=EIF4G1 PE=1 SV=4	HUMAN	33	0.6951	0.7918	0.7451	0.7659
3823	1.68	1.78	32.4	sp|Q14790|CASP8_HUMAN	Caspase-8 OS=Homo sapiens GN=CASP8 PE=1 SV=1	HUMAN	1	0.6958	0.9191	0.7248	0.7659
1088	12.49	13.59	72.8	sp|P07741|APT_HUMAN	Adenine phosphoribosyltransferase OS=Homo sapiens GN=APRT PE=1 SV=2	HUMAN	11	0.696	0.9044	0.7946	0.767
1509	8.62	8.71	35.6	sp|Q9Y371|SHLB1_HUMAN	Endophilin-B1 OS=Homo sapiens GN=SH3GLB1 PE=1 SV=1	HUMAN	6	0.6961	0.9691	0.647	0.767
4326	0.27	0.32	21.1	sp|Q9BUH8|BEGIN_HUMAN	Brain-enriched guanylate kinase-associated protein OS=Homo sapiens GN=BEGAIN PE=1 SV=1	HUMAN	0	0.6961	0.8523	1.6846	0.768
4076	0.76	1.25	21	sp|Q9ULK4|MED23_HUMAN	Mediator of RNA polymerase II transcription subunit 23 OS=Homo sapiens GN=MED23 PE=1 SV=2	HUMAN	2	0.6964	0.8818	0.5169	0.7682
511	22.06	22.16	93.2	sp|P67809|YBOX1_HUMAN	Nuclease-sensitive element-binding protein 1 OS=Homo sapiens GN=YBX1 PE=1 SV=3	HUMAN	24	0.6967	0.9175	0.7742	0.7685
3040	2.38	2.43	22.2	sp|Q9UGP4|LIMD1_HUMAN	LIM domain-containing protein 1 OS=Homo sapiens GN=LIMD1 PE=1 SV=1	HUMAN	4	0.6969	0.8561	0.8125	0.769
21	99.66	101.31	90.6	sp|P07237|PDIA1_HUMAN	Protein disulfide-isomerase OS=Homo sapiens GN=P4HB PE=1 SV=3	HUMAN	87	0.6971	0.8886	0.723	0.7692
2211	5.16	5.17	40.5	sp|Q9BXR0|TGT_HUMAN	Queuine tRNA-ribosyltransferase OS=Homo sapiens GN=QTRT1 PE=1 SV=3	HUMAN	3	0.6973	0.8057	0.9569	0.7696
2873	3.02	3.55	18.7	sp|Q92733|PRCC_HUMAN	Proline-rich protein PRCC OS=Homo sapiens GN=PRCC PE=1 SV=1	HUMAN	2	0.6976	1.0064	0.7643	0.7701
877	15.13	15.91	41	sp|O14617|AP3D1_HUMAN	AP-3 complex subunit delta-1 OS=Homo sapiens GN=AP3D1 PE=1 SV=1	HUMAN	8	0.6977	0.8433	0.7949	0.7704
2245	4.97	5.15	29.9	sp|Q8N3D4|EH1L1_HUMAN	EH domain-binding protein 1-like protein 1 OS=Homo sapiens GN=EHBP1L1 PE=1 SV=2	HUMAN	3	0.6978	0.7848	0.7587	0.7706
4733	0.08	0.09	33.6	sp|Q9NXN4|GDAP2_HUMAN	Ganglioside-induced differentiation-associated protein 2 OS=Homo sapiens GN=GDAP2 PE=2 SV=1	HUMAN	0	0.6979	1.346	0.627	0.7707
1550	8.34	8.86	37.1	sp|P35221|CTNA1_HUMAN	Catenin alpha-1 OS=Homo sapiens GN=CTNNA1 PE=1 SV=1	HUMAN	5	0.6983	0.6774	0.7922	0.7711
1900	6.28	6.5	51.9	sp|P31749|AKT1_HUMAN	RAC-alpha serine/threonine-protein kinase OS=Homo sapiens GN=AKT1 PE=1 SV=2	HUMAN	3	0.6987	0.8898	0.975	0.7714
1859	6.5	6.54	65.7	sp|Q9GZZ1|NAA50_HUMAN	N-alpha-acetyltransferase 50 OS=Homo sapiens GN=NAA50 PE=1 SV=1	HUMAN	3	0.6988	0.9434	0.7022	0.7729
1776	7	8.95	42.4	sp|Q2M389|WASH7_HUMAN	WASH complex subunit 7 OS=Homo sapiens GN=KIAA1033 PE=1 SV=2	HUMAN	6	0.699	0.8686	0.7393	0.7737
4369	0.23	0.24	52.7	sp|Q9NZE8|RM35_HUMAN	39S ribosomal protein L35, mitochondrial OS=Homo sapiens GN=MRPL35 PE=2 SV=3	HUMAN	0	0.6996	0.9253	0.8643	0.7738
1098	12.35	14.51	24.4	sp|Q8WTT2|NOC3L_HUMAN	Nucleolar complex protein 3 homolog OS=Homo sapiens GN=NOC3L PE=1 SV=1	HUMAN	9	0.6997	0.9373	0.7662	0.7739
1401	9.59	9.76	55.2	sp|Q9Y314|NOSIP_HUMAN	Nitric oxide synthase-interacting protein OS=Homo sapiens GN=NOSIP PE=1 SV=1	HUMAN	8	0.6998	0.8352	0.7632	0.774
2368	4.36	4.46	33.3	sp|P53350|PLK1_HUMAN	Serine/threonine-protein kinase PLK1 OS=Homo sapiens GN=PLK1 PE=1 SV=1	HUMAN	2	0.7	0.7402	1.0002	0.775
2681	3.85	6.07	56.6	sp|Q9NWU2|GID8_HUMAN	Glucose-induced degradation protein 8 homolog OS=Homo sapiens GN=GID8 PE=1 SV=1	HUMAN	3	0.7001	0.7622	0.6291	0.7751
4079	0.76	0.81	27.3	sp|Q8IUF8|MINA_HUMAN	MYC-induced nuclear antigen OS=Homo sapiens GN=MINA PE=1 SV=1	HUMAN	1	0.7008	1.237	0.686	0.7761
1912	6.23	7.33	33.2	sp|Q01433|AMPD2_HUMAN	AMP deaminase 2 OS=Homo sapiens GN=AMPD2 PE=1 SV=2	HUMAN	4	0.7009	1.2232	0.7689	0.7761
1886	6.36	6.43	34.9	sp|A6NDG6|PGP_HUMAN	Phosphoglycolate phosphatase OS=Homo sapiens GN=PGP PE=1 SV=1	HUMAN	5	0.7017	0.8526	0.8114	0.7761
4622	0.1	0.26	22	sp|Q9NVN8|GNL3L_HUMAN	Guanine nucleotide-binding protein-like 3-like protein OS=Homo sapiens GN=GNL3L PE=1 SV=1	HUMAN	0	0.7019	1.0529	0.7192	0.7766
2643	4	4.02	32	sp|Q5T440|CAF17_HUMAN	Putative transferase CAF17, mitochondrial OS=Homo sapiens GN=IBA57 PE=1 SV=1	HUMAN	3	0.7022	1.1776	0.79	0.7767
1794	6.92	15.45	55.7	sp|P63000|RAC1_HUMAN	Ras-related C3 botulinum toxin substrate 1 OS=Homo sapiens GN=RAC1 PE=1 SV=1	HUMAN	11	0.7045	0.9266	0.8084	0.7768
4007	0.97	1.19	18.8	sp|P49356|FNTB_HUMAN	Protein farnesyltransferase subunit beta OS=Homo sapiens GN=FNTB PE=1 SV=1	HUMAN	2	0.7046	0.634	0.9454	0.7771
4213	0.43	9.24	30	sp|Q9UPW6|SATB2_HUMAN	DNA-binding protein SATB2 OS=Homo sapiens GN=SATB2 PE=1 SV=2	HUMAN	5	0.705	0.5013	0.6682	0.7774
218	39.01	53.3	69.5	sp|P17844|DDX5_HUMAN	Probable ATP-dependent RNA helicase DDX5 OS=Homo sapiens GN=DDX5 PE=1 SV=1	HUMAN	47	0.705	0.8208	0.7466	0.7774
2361	4.36	5.66	66.5	sp|Q96K17|BT3L4_HUMAN	Transcription factor BTF3 homolog 4 OS=Homo sapiens GN=BTF3L4 PE=1 SV=1	HUMAN	6	0.7051	1.0131	0.8548	0.7779
3047	2.36	6.68	38.3	sp|P27361|MK03_HUMAN	Mitogen-activated protein kinase 3 OS=Homo sapiens GN=MAPK3 PE=1 SV=4	HUMAN	5	0.7052	0.6122	0.7475	0.7779
3037	2.39	2.4	27.6	sp|O00142|KITM_HUMAN	Thymidine kinase 2, mitochondrial OS=Homo sapiens GN=TK2 PE=1 SV=4	HUMAN	2	0.7053	1.6483	0.4147	0.7781
280	33.2	35.58	53.9	sp|P14317|HCLS1_HUMAN	Hematopoietic lineage cell-specific protein OS=Homo sapiens GN=HCLS1 PE=1 SV=3	HUMAN	29	0.7053	0.8642	0.8098	0.7781
4036	0.89	0.9	35.9	sp|Q9UK45|LSM7_HUMAN	U6 snRNA-associated Sm-like protein LSm7 OS=Homo sapiens GN=LSM7 PE=1 SV=1	HUMAN	2	0.7053	1.109	0.6919	0.7782
2214	5.14	5.23	41	sp|O95232|LC7L3_HUMAN	Luc7-like protein 3 OS=Homo sapiens GN=LUC7L3 PE=1 SV=2	HUMAN	4	0.7053	1.0569	0.8005	0.7782
2123	5.62	6.17	35.1	sp|Q8WWI1|LMO7_HUMAN	LIM domain only protein 7 OS=Homo sapiens GN=LMO7 PE=1 SV=3	HUMAN	3	0.7056	0.9279	0.8639	0.7785
2829	3.16	3.53	38.7	sp|Q8N884|M21D1_HUMAN	Protein MB21D1 OS=Homo sapiens GN=MB21D1 PE=1 SV=2	HUMAN	2	0.7063	0.809	0.7302	0.7789
1418	9.4	10.27	39.3	sp|O95793|STAU1_HUMAN	Double-stranded RNA-binding protein Staufen homolog 1 OS=Homo sapiens GN=STAU1 PE=1 SV=2	HUMAN	4	0.7064	0.7855	0.6329	0.7792
3744	2	2	24.5	sp|Q7Z4H3|HDDC2_HUMAN	HD domain-containing protein 2 OS=Homo sapiens GN=HDDC2 PE=1 SV=1	HUMAN	1	0.7065	0.6187	0.6947	0.7798
1570	8.23	56.12	90	sp|P10412|H14_HUMAN	Histone H1.4 OS=Homo sapiens GN=HIST1H1E PE=1 SV=2	HUMAN	39	0.7066	0.9246	0.7908	0.78
2993	2.5	2.97	42.1	sp|Q96AX1|VP33A_HUMAN	Vacuolar protein sorting-associated protein 33A OS=Homo sapiens GN=VPS33A PE=1 SV=1	HUMAN	2	0.7068	0.4905	0.7686	0.7801
2936	2.73	3.18	37.6	sp|Q16666|IF16_HUMAN	Gamma-interferon-inducible protein 16 OS=Homo sapiens GN=IFI16 PE=1 SV=3	HUMAN	2	0.7073	1.0252	0.9975	0.7802
4676	0.09	0.15	20.3	RRRRRsp|O60287|NPA1P_HUMAN	REVERSED Nucleolar pre-ribosomal-associated protein 1 OS=Homo sapiens GN=URB1 PE=1 SV=4	HUMAN	1	0.7075	0.7467	0.8746	0.7804
4860	0.06	0.13	16	RRRRRsp|Q9Y5H1|PCDG2_HUMAN	REVERSED Protocadherin gamma-A2 OS=Homo sapiens GN=PCDHGA2 PE=2 SV=1	HUMAN	0	0.7078	1.7462	1.1509	0.7808
1726	7.36	9.59	39.5	sp|Q9NW64|RBM22_HUMAN	Pre-mRNA-splicing factor RBM22 OS=Homo sapiens GN=RBM22 PE=1 SV=1	HUMAN	5	0.7079	0.6839	0.8092	0.7809
1340	10.03	11.02	29.7	sp|O60231|DHX16_HUMAN	Putative pre-mRNA-splicing factor ATP-dependent RNA helicase DHX16 OS=Homo sapiens GN=DHX16 PE=1 SV=2	HUMAN	6	0.7079	0.7584	0.8647	0.7809
3951	1.15	1.23	23	sp|Q15334|L2GL1_HUMAN	Lethal(2) giant larvae protein homolog 1 OS=Homo sapiens GN=LLGL1 PE=1 SV=3	HUMAN	1	0.7087	0.6394	0.9968	0.7816
3011	2.47	2.48	72.3	sp|Q8WVK2|SNR27_HUMAN	U4/U6.U5 small nuclear ribonucleoprotein 27 kDa protein OS=Homo sapiens GN=SNRNP27 PE=1 SV=1	HUMAN	3	0.7087	0.9068	0.777	0.7821
2867	3.04	3.04	68.3	sp|Q9UI09|NDUAC_HUMAN	NADH dehydrogenase [ubiquinone] 1 alpha subcomplex subunit 12 OS=Homo sapiens GN=NDUFA12 PE=1 SV=1	HUMAN	3	0.7087	0.9671	0.7565	0.7826
2560	4.01	4.08	18.2	sp|Q6ZW49|PAXI1_HUMAN	PAX-interacting protein 1 OS=Homo sapiens GN=PAXIP1 PE=1 SV=2	HUMAN	2	0.7092	0.4097	1.8213	0.7826
2706	3.73	47.27	63.7	sp|P54652|HSP72_HUMAN	Heat shock-related 70 kDa protein 2 OS=Homo sapiens GN=HSPA2 PE=1 SV=1	HUMAN	58	0.7092	0.885	1.0481	0.7826
3615	2	2.07	24.2	sp|Q13488|VPP3_HUMAN	V-type proton ATPase 116 kDa subunit a isoform 3 OS=Homo sapiens GN=TCIRG1 PE=1 SV=3	HUMAN	1	0.7097	0.3708	0.5342	0.7828
4319	0.28	0.54	38.7	sp|Q9NW08|RPC2_HUMAN	DNA-directed RNA polymerase III subunit RPC2 OS=Homo sapiens GN=POLR3B PE=1 SV=2	HUMAN	1	0.7099	0.5883	0.9626	0.783
2926	2.79	2.82	35.2	sp|Q15388|TOM20_HUMAN	Mitochondrial import receptor subunit TOM20 homolog OS=Homo sapiens GN=TOMM20 PE=1 SV=1	HUMAN	2	0.71	0.8863	0.7688	0.7831
444	24.35	24.42	69.9	sp|P62750|RL23A_HUMAN	60S ribosomal protein L23a OS=Homo sapiens GN=RPL23A PE=1 SV=1	HUMAN	20	0.711	0.9733	0.789	0.7832
2763	3.49	8.94	39	sp|P30466|1B18_HUMAN	HLA class I histocompatibility antigen, B-18 alpha chain OS=Homo sapiens GN=HLA-B PE=1 SV=1	HUMAN	8	0.7115	0.6879	0.8207	0.7833
43	82.58	152.62	80.3	sp|P07900|HS90A_HUMAN	Heat shock protein HSP 90-alpha OS=Homo sapiens GN=HSP90AA1 PE=1 SV=5	HUMAN	217	0.7115	0.9076	0.7545	0.7836
1701	7.58	8.53	34.9	sp|O43747|AP1G1_HUMAN	AP-1 complex subunit gamma-1 OS=Homo sapiens GN=AP1G1 PE=1 SV=5	HUMAN	4	0.7116	0.9562	0.7782	0.784
2172	5.36	6.39	28.7	sp|P22570|ADRO_HUMAN	NADPH:adrenodoxin oxidoreductase, mitochondrial OS=Homo sapiens GN=FDXR PE=1 SV=3	HUMAN	5	0.7121	1.1198	0.5022	0.7841
2890	2.94	3.69	44.4	sp|Q9C0E8|LNP_HUMAN	Protein lunapark OS=Homo sapiens GN=LNP PE=1 SV=2	HUMAN	2	0.7124	0.668	0.6875	0.7842
2801	3.32	3.36	32.4	sp|Q6P1K8|T2H2L_HUMAN	General transcription factor IIH subunit 2-like protein OS=Homo sapiens GN=GTF2H2C PE=2 SV=1	HUMAN	2	0.7126	0.9512	0.6846	0.7853
3781	1.85	2.26	38.8	sp|O75323|NIPS2_HUMAN	Protein NipSnap homolog 2 OS=Homo sapiens GN=GBAS PE=1 SV=1	HUMAN	1	0.7126	1.054	0.6624	0.7853
1066	12.75	13.09	46.3	sp|P51572|BAP31_HUMAN	B-cell receptor-associated protein 31 OS=Homo sapiens GN=BCAP31 PE=1 SV=3	HUMAN	9	0.7127	1.0033	0.7898	0.7855
2403	4.2	4.48	32.1	sp|Q9BVS4|RIOK2_HUMAN	Serine/threonine-protein kinase RIO2 OS=Homo sapiens GN=RIOK2 PE=1 SV=2	HUMAN	2	0.7135	0.7414	0.662	0.7859
1451	9.12	9.25	59.6	sp|P48729|KC1A_HUMAN	Casein kinase I isoform alpha OS=Homo sapiens GN=CSNK1A1 PE=1 SV=2	HUMAN	7	0.7135	0.9466	0.864	0.7861
4356	0.24	0.28	43.3	sp|Q9NVS9|PNPO_HUMAN	Pyridoxine-5'-phosphate oxidase OS=Homo sapiens GN=PNPO PE=1 SV=1	HUMAN	1	0.7136	1.0459	0.9209	0.7869
833	15.77	16.18	68.5	sp|P78417|GSTO1_HUMAN	Glutathione S-transferase omega-1 OS=Homo sapiens GN=GSTO1 PE=1 SV=2	HUMAN	8	0.7137	0.8746	0.8451	0.7873
2568	4.01	4.02	56.9	sp|Q9NVP2|ASF1B_HUMAN	Histone chaperone ASF1B OS=Homo sapiens GN=ASF1B PE=1 SV=1	HUMAN	4	0.7138	0.6648	1.0291	0.7875
2679	3.87	3.9	44.6	sp|Q9H936|GHC1_HUMAN	Mitochondrial glutamate carrier 1 OS=Homo sapiens GN=SLC25A22 PE=1 SV=1	HUMAN	3	0.7139	0.782	1.0445	0.7875
4019	0.93	1.02	36.8	sp|Q9BXI6|TB10A_HUMAN	TBC1 domain family member 10A OS=Homo sapiens GN=TBC1D10A PE=1 SV=1	HUMAN	1	0.7142	0.5387	0.8095	0.7877
3247	2.04	2.62	29.2	sp|Q9UHW5|GPN3_HUMAN	GPN-loop GTPase 3 OS=Homo sapiens GN=GPN3 PE=1 SV=2	HUMAN	2	0.7143	1.5331	1.1617	0.7879
2459	4.08	4.39	26.9	sp|O15126|SCAM1_HUMAN	Secretory carrier-associated membrane protein 1 OS=Homo sapiens GN=SCAMP1 PE=1 SV=2	HUMAN	3	0.7145	0.916	0.8083	0.7887
2234	5.02	5.54	27.7	sp|Q8N573|OXR1_HUMAN	Oxidation resistance protein 1 OS=Homo sapiens GN=OXR1 PE=1 SV=2	HUMAN	3	0.7146	0.986	0.7177	0.7887
3386	2.01	2.32	25.5	sp|Q96RL1|UIMC1_HUMAN	BRCA1-A complex subunit RAP80 OS=Homo sapiens GN=UIMC1 PE=1 SV=2	HUMAN	1	0.7147	0.9083	0.6872	0.7895
2587	4	4.32	19.3	sp|Q5JU69|TOR2A_HUMAN	Torsin-2A OS=Homo sapiens GN=TOR2A PE=2 SV=1	HUMAN	2	0.7147	0.8124	0.7937	0.7897
4201	0.46	0.81	23.5	sp|Q9BQ70|TCF25_HUMAN	Transcription factor 25 OS=Homo sapiens GN=TCF25 PE=1 SV=1	HUMAN	1	0.7147	0.8846	0.8677	0.7899
224	38.31	39.22	59.7	sp|Q9BTM1|H2AJ_HUMAN	Histone H2A.J OS=Homo sapiens GN=H2AFJ PE=1 SV=1	HUMAN	70	0.7147	0.9582	0.8271	0.7901
4581	0.11	0.6	52.2	sp|Q9H0F7|ARL6_HUMAN	ADP-ribosylation factor-like protein 6 OS=Homo sapiens GN=ARL6 PE=1 SV=1	HUMAN	0	0.7147	1.3463	0.9979	0.7902
4251	0.37	0.44	25.7	sp|Q9BRR8|GPTC1_HUMAN	G patch domain-containing protein 1 OS=Homo sapiens GN=GPATCH1 PE=1 SV=1	HUMAN	0	0.7151	1.0828	0.7183	0.7913
27	91.12	91.63	89.2	sp|P68104|EF1A1_HUMAN	Elongation factor 1-alpha 1 OS=Homo sapiens GN=EEF1A1 PE=1 SV=1	HUMAN	146	0.7155	0.9254	0.7652	0.7913
3239	2.05	2.1	61.3	sp|Q8IXM3|RM41_HUMAN	39S ribosomal protein L41, mitochondrial OS=Homo sapiens GN=MRPL41 PE=1 SV=1	HUMAN	2	0.7155	0.9763	0.8139	0.7915
4280	0.33	0.38	7.8	sp|Q9C0B0|UNK_HUMAN	RING finger protein unkempt homolog OS=Homo sapiens GN=UNK PE=1 SV=2	HUMAN	1	0.7156	0.5552	3.1917	0.7915
2856	3.08	3.24	34.5	sp|Q96P11|NSUN5_HUMAN	Putative methyltransferase NSUN5 OS=Homo sapiens GN=NSUN5 PE=1 SV=2	HUMAN	2	0.7157	0.7759	0.8091	0.7919
787	16.6	17.95	55.9	sp|P50579|AMPM2_HUMAN	Methionine aminopeptidase 2 OS=Homo sapiens GN=METAP2 PE=1 SV=1	HUMAN	11	0.7157	0.8504	0.792	0.792
3393	2.01	2.26	24.3	sp|P41218|MNDA_HUMAN	Myeloid cell nuclear differentiation antigen OS=Homo sapiens GN=MNDA PE=1 SV=1	HUMAN	1	0.716	0.7239	0.6297	0.7921
2257	4.9	5.27	35.4	sp|Q13137|CACO2_HUMAN	Calcium-binding and coiled-coil domain-containing protein 2 OS=Homo sapiens GN=CALCOCO2 PE=1 SV=1	HUMAN	4	0.7167	0.802	0.8991	0.7921
3921	1.3	3.22	20.6	sp|Q9P2K8|E2AK4_HUMAN	Eukaryotic translation initiation factor 2-alpha kinase 4 OS=Homo sapiens GN=EIF2AK4 PE=1 SV=3	HUMAN	2	0.7168	0.8139	0.6947	0.7925
3984	1.04	3.29	24.9	sp|Q14249|NUCG_HUMAN	Endonuclease G, mitochondrial OS=Homo sapiens GN=ENDOG PE=1 SV=4	HUMAN	2	0.7169	0.6399	0.4873	0.7925
2184	5.31	5.33	27.3	sp|Q9NVT9|ARMC1_HUMAN	Armadillo repeat-containing protein 1 OS=Homo sapiens GN=ARMC1 PE=1 SV=1	HUMAN	3	0.7169	0.9241	0.6948	0.7926
235	37.19	38.1	64.4	sp|P31943|HNRH1_HUMAN	Heterogeneous nuclear ribonucleoprotein H OS=Homo sapiens GN=HNRNPH1 PE=1 SV=4	HUMAN	71	0.7175	0.9331	0.7453	0.7927
2279	4.78	7.16	26.5	sp|Q9NZI7|UBIP1_HUMAN	Upstream-binding protein 1 OS=Homo sapiens GN=UBP1 PE=2 SV=1	HUMAN	7	0.7179	0.8961	0.5023	0.7928
384	26.48	27.67	50.7	sp|P41250|SYG_HUMAN	Glycine--tRNA ligase OS=Homo sapiens GN=GARS PE=1 SV=3	HUMAN	23	0.7179	0.9564	0.7527	0.793
1733	7.35	7.36	52.1	sp|P26885|FKBP2_HUMAN	Peptidyl-prolyl cis-trans isomerase FKBP2 OS=Homo sapiens GN=FKBP2 PE=1 SV=2	HUMAN	5	0.7181	0.8032	0.8184	0.7932
1059	12.82	13.19	24.7	sp|P46379|BAG6_HUMAN	Large proline-rich protein BAG6 OS=Homo sapiens GN=BAG6 PE=1 SV=2	HUMAN	8	0.7183	0.9313	0.7161	0.7933
2943	2.7	3.3	30.3	sp|Q9NZ08|ERAP1_HUMAN	Endoplasmic reticulum aminopeptidase 1 OS=Homo sapiens GN=ERAP1 PE=1 SV=3	HUMAN	2	0.7184	0.833	1.2972	0.7937
3979	1.05	1.38	12	sp|Q9H000|MKRN2_HUMAN	Probable E3 ubiquitin-protein ligase makorin-2 OS=Homo sapiens GN=MKRN2 PE=1 SV=2	HUMAN	1	0.7184	1.4836	0.9068	0.7938
3816	1.72	1.72	26.7	sp|Q9Y2Y9|KLF13_HUMAN	Krueppel-like factor 13 OS=Homo sapiens GN=KLF13 PE=1 SV=1	HUMAN	1	0.7186	2.0578	0.4071	0.7938
3055	2.35	2.38	41.6	sp|O14656|TOR1A_HUMAN	Torsin-1A OS=Homo sapiens GN=TOR1A PE=1 SV=1	HUMAN	1	0.7187	1.024	0.5917	0.7943
2408	4.19	4.36	26.6	sp|Q9H9P8|L2HDH_HUMAN	L-2-hydroxyglutarate dehydrogenase, mitochondrial OS=Homo sapiens GN=L2HGDH PE=1 SV=3	HUMAN	2	0.7191	1.0023	0.8209	0.7944
3613	2	2.08	12.2	sp|Q9BYB4|GNB1L_HUMAN	Guanine nucleotide-binding protein subunit beta-like protein 1 OS=Homo sapiens GN=GNB1L PE=1 SV=2	HUMAN	1	0.7192	1.1132	0.6524	0.7945
3139	2.17	2.22	35.2	sp|P82932|RT06_HUMAN	28S ribosomal protein S6, mitochondrial OS=Homo sapiens GN=MRPS6 PE=1 SV=3	HUMAN	1	0.7195	0.9454	0.6803	0.7947
842	15.59	15.79	53.5	sp|Q07666|KHDR1_HUMAN	KH domain-containing, RNA-binding, signal transduction-associated protein 1 OS=Homo sapiens GN=KHDRBS1 PE=1 SV=1	HUMAN	11	0.7195	0.9446	0.788	0.7949
3446	2.01	2.03	61.1	sp|Q96IZ7|RSRC1_HUMAN	Serine/Arginine-related protein 53 OS=Homo sapiens GN=RSRC1 PE=1 SV=1	HUMAN	1	0.7198	0.8301	0.762	0.795
764	17.07	17.08	52.4	sp|P25685|DNJB1_HUMAN	DnaJ homolog subfamily B member 1 OS=Homo sapiens GN=DNAJB1 PE=1 SV=4	HUMAN	13	0.7199	0.8819	0.7467	0.7959
2609	4	4.1	23.1	sp|O95104|SFR15_HUMAN	Splicing factor, arginine/serine-rich 15 OS=Homo sapiens GN=SCAF4 PE=1 SV=3	HUMAN	2	0.7202	0.8791	0.884	0.7966
1689	7.64	7.68	78.4	sp|O00422|SAP18_HUMAN	Histone deacetylase complex subunit SAP18 OS=Homo sapiens GN=SAP18 PE=1 SV=1	HUMAN	5	0.7203	0.9883	0.7849	0.797
707	17.95	19.7	82.1	sp|P30085|KCY_HUMAN	UMP-CMP kinase OS=Homo sapiens GN=CMPK1 PE=1 SV=3	HUMAN	16	0.7204	0.9178	0.8202	0.7974
3650	2	2.04	19.4	sp|Q96FZ7|CHMP6_HUMAN	Charged multivesicular body protein 6 OS=Homo sapiens GN=CHMP6 PE=1 SV=3	HUMAN	2	0.7204	1.0454	0.7462	0.7975
1635	8	8.04	43	sp|Q15628|TRADD_HUMAN	Tumor necrosis factor receptor type 1-associated DEATH domain protein OS=Homo sapiens GN=TRADD PE=1 SV=2	HUMAN	4	0.7205	0.9259	0.8534	0.7977
3811	1.73	1.76	27.3	sp|O14757|CHK1_HUMAN	Serine/threonine-protein kinase Chk1 OS=Homo sapiens GN=CHEK1 PE=1 SV=2	HUMAN	1	0.7208	0.9606	0.5037	0.7978
1468	8.97	9.49	45.5	sp|Q7Z460|CLAP1_HUMAN	CLIP-associating protein 1 OS=Homo sapiens GN=CLASP1 PE=1 SV=1	HUMAN	5	0.7208	0.8509	0.8186	0.7979
9	144.97	146.11	87.6	sp|P11142|HSP7C_HUMAN	Heat shock cognate 71 kDa protein OS=Homo sapiens GN=HSPA8 PE=1 SV=1	HUMAN	200	0.7209	0.8922	0.7531	0.7987
935	14.34	14.81	42.8	sp|Q96CW5|GCP3_HUMAN	Gamma-tubulin complex component 3 OS=Homo sapiens GN=TUBGCP3 PE=1 SV=2	HUMAN	9	0.721	0.9276	0.8325	0.7987
601	19.98	41.14	92.3	sp|P26583|HMGB2_HUMAN	High mobility group protein B2 OS=Homo sapiens GN=HMGB2 PE=1 SV=2	HUMAN	30	0.7213	0.9573	0.7869	0.7987
4620	0.1	0.28	44.7	RRRRRsp|P33176|KINH_HUMAN	REVERSED Kinesin-1 heavy chain OS=Homo sapiens GN=KIF5B PE=1 SV=1	HUMAN	0	0.7214	1.0958	1.0076	0.799
2349	4.43	5.01	25.1	sp|O95870|ABHGA_HUMAN	Abhydrolase domain-containing protein 16A OS=Homo sapiens GN=ABHD16A PE=1 SV=3	HUMAN	4	0.7217	0.8139	0.6841	0.7995
3672	2	2.03	15	sp|Q96EK4|THA11_HUMAN	THAP domain-containing protein 11 OS=Homo sapiens GN=THAP11 PE=1 SV=2	HUMAN	1	0.7221	0.8136	0.9186	0.7996
1679	7.72	7.89	40.3	sp|Q6IAN0|DRS7B_HUMAN	Dehydrogenase/reductase SDR family member 7B OS=Homo sapiens GN=DHRS7B PE=1 SV=2	HUMAN	5	0.7222	1.1575	0.7406	0.7997
922	14.5	15.74	67.5	sp|Q99614|TTC1_HUMAN	Tetratricopeptide repeat protein 1 OS=Homo sapiens GN=TTC1 PE=1 SV=1	HUMAN	8	0.7231	0.8832	0.822	0.7997
3034	2.4	2.79	32.1	sp|P57772|SELB_HUMAN	Selenocysteine-specific elongation factor OS=Homo sapiens GN=EEFSEC PE=1 SV=4	HUMAN	2	0.7232	0.9986	0.7095	0.8002
4074	0.77	0.9	23.2	sp|Q96EK5|KBP_HUMAN	KIF1-binding protein OS=Homo sapiens GN=KIAA1279 PE=1 SV=1	HUMAN	1	0.7234	1.1956	1.512	0.8003
2612	4	4.08	16	sp|Q8NCE2|MTMRE_HUMAN	Myotubularin-related protein 14 OS=Homo sapiens GN=MTMR14 PE=1 SV=2	HUMAN	2	0.7235	0.8043	0.7748	0.8008
3609	2	2.08	47.3	sp|P49069|CAMLG_HUMAN	Calcium signal-modulating cyclophilin ligand OS=Homo sapiens GN=CAMLG PE=1 SV=1	HUMAN	1	0.7236	0.7505	0.5996	0.801
4282	0.33	0.33	11.9	sp|Q96B02|UBE2W_HUMAN	Ubiquitin-conjugating enzyme E2 W OS=Homo sapiens GN=UBE2W PE=1 SV=1	HUMAN	1	0.7237	0.6222	0.9842	0.8011
1535	8.45	8.62	40.8	sp|O15160|RPAC1_HUMAN	DNA-directed RNA polymerases I and III subunit RPAC1 OS=Homo sapiens GN=POLR1C PE=1 SV=1	HUMAN	7	0.7238	0.9198	0.8012	0.8016
902	14.75	14.99	76	sp|O14745|NHRF1_HUMAN	Na(+)/H(+) exchange regulatory cofactor NHE-RF1 OS=Homo sapiens GN=SLC9A3R1 PE=1 SV=4	HUMAN	10	0.7239	0.8483	0.7959	0.8017
1260	10.64	12.01	34.8	sp|P13645|K1C10_HUMAN	Keratin, type I cytoskeletal 10 OS=Homo sapiens GN=KRT10 PE=1 SV=6	HUMAN	7	0.7239	1.0953	0.8637	0.8021
3543	2	2.22	26.8	sp|Q8IZ73|RUSD2_HUMAN	RNA pseudouridylate synthase domain-containing protein 2 OS=Homo sapiens GN=RPUSD2 PE=1 SV=2	HUMAN	1	0.724	1.3343	0.5747	0.8023
91	59.95	91.87	84.1	sp|P08107|HSP71_HUMAN	Heat shock 70 kDa protein 1A/1B OS=Homo sapiens GN=HSPA1A PE=1 SV=5	HUMAN	85	0.7242	0.8301	0.7864	0.8025
2863	3.05	3.49	23.7	sp|Q8TCG1|CIP2A_HUMAN	Protein CIP2A OS=Homo sapiens GN=KIAA1524 PE=1 SV=2	HUMAN	2	0.7246	0.7283	1.1769	0.8028
3923	1.3	1.52	33.4	sp|Q5T5Y3|CAMP1_HUMAN	Calmodulin-regulated spectrin-associated protein 1 OS=Homo sapiens GN=CAMSAP1 PE=1 SV=2	HUMAN	1	0.7247	0.7118	0.487	0.8028
3598	2	2.09	20.7	sp|P15309|PPAP_HUMAN	Prostatic acid phosphatase OS=Homo sapiens GN=ACPP PE=1 SV=3	HUMAN	1	0.7247	1.0985	0.6218	0.8034
1763	7.13	8.04	43.4	sp|Q9BWT6|MND1_HUMAN	Meiotic nuclear division protein 1 homolog OS=Homo sapiens GN=MND1 PE=1 SV=1	HUMAN	4	0.7249	0.8484	0.7833	0.8034
3693	2	2.02	46.8	sp|Q96A26|F162A_HUMAN	Protein FAM162A OS=Homo sapiens GN=FAM162A PE=1 SV=2	HUMAN	1	0.725	0.9654	0.8298	0.8037
603	19.93	21.01	67.6	sp|Q9Y5X3|SNX5_HUMAN	Sorting nexin-5 OS=Homo sapiens GN=SNX5 PE=1 SV=1	HUMAN	12	0.7252	0.8761	0.7803	0.8041
248	36.19	37.65	67.9	sp|Q14103|HNRPD_HUMAN	Heterogeneous nuclear ribonucleoprotein D0 OS=Homo sapiens GN=HNRNPD PE=1 SV=1	HUMAN	36	0.7254	0.9552	0.8047	0.8042
951	14.09	14.5	51.9	sp|P61221|ABCE1_HUMAN	ATP-binding cassette sub-family E member 1 OS=Homo sapiens GN=ABCE1 PE=1 SV=1	HUMAN	14	0.7255	0.9285	0.8028	0.8043
3959	1.13	1.3	20.5	sp|Q9BSR8|YIPF4_HUMAN	Protein YIPF4 OS=Homo sapiens GN=YIPF4 PE=1 SV=1	HUMAN	1	0.7255	1.176	0.7777	0.8046
710	17.91	18.16	60.4	sp|Q7L1Q6|BZW1_HUMAN	Basic leucine zipper and W2 domain-containing protein 1 OS=Homo sapiens GN=BZW1 PE=1 SV=1	HUMAN	9	0.7256	0.8671	0.8702	0.8055
3443	2.01	2.04	28.4	sp|Q9Y375|CIA30_HUMAN	Complex I intermediate-associated protein 30, mitochondrial OS=Homo sapiens GN=NDUFAF1 PE=1 SV=2	HUMAN	1	0.7258	0.8902	0.6585	0.8062
4958	0.05	0.18	32.6	sp|Q9HAS0|NJMU_HUMAN	Protein Njmu-R1 OS=Homo sapiens GN=C17orf75 PE=1 SV=2	HUMAN	0	0.7258	0.6091	1.12	0.8063
1599	8.06	8.19	33.5	sp|Q8NHJ6|LIRB4_HUMAN	Leukocyte immunoglobulin-like receptor subfamily B member 4 OS=Homo sapiens GN=LILRB4 PE=1 SV=3	HUMAN	4	0.726	0.8374	0.7855	0.8071
297	31.31	32.14	37.3	sp|P16615|AT2A2_HUMAN	Sarcoplasmic/endoplasmic reticulum calcium ATPase 2 OS=Homo sapiens GN=ATP2A2 PE=1 SV=1	HUMAN	19	0.7261	0.8947	0.7974	0.8077
3407	2.01	2.2	32.8	sp|P26572|MGAT1_HUMAN	Alpha-1,3-mannosyl-glycoprotein 2-beta-N-acetylglucosaminyltransferase OS=Homo sapiens GN=MGAT1 PE=2 SV=2	HUMAN	2	0.7262	1.0621	0.5726	0.8079
432	24.82	25.63	94.4	sp|O75947|ATP5H_HUMAN	ATP synthase subunit d, mitochondrial OS=Homo sapiens GN=ATP5H PE=1 SV=3	HUMAN	26	0.7266	0.9449	0.797	0.8083
4734	0.08	0.09	17.6	sp|Q8ND76|CCNY_HUMAN	Cyclin-Y OS=Homo sapiens GN=CCNY PE=1 SV=2	HUMAN	0	0.7266	0.5594	1.9434	0.8083
1	439.17	439.17	88	sp|Q09666|AHNK_HUMAN	Neuroblast differentiation-associated protein AHNAK OS=Homo sapiens GN=AHNAK PE=1 SV=2	HUMAN	324	0.7269	0.8682	0.8032	0.8094
4257	0.36	0.76	28.6	RRRRRsp|Q5BJE1|CC178_HUMAN	REVERSED Coiled-coil domain-containing protein 178 OS=Homo sapiens GN=CCDC178 PE=1 SV=3	HUMAN	1	0.727	1.1827	0.7332	0.8094
414	25.43	25.61	75.5	sp|Q8NC51|PAIRB_HUMAN	Plasminogen activator inhibitor 1 RNA-binding protein OS=Homo sapiens GN=SERBP1 PE=1 SV=2	HUMAN	23	0.7272	0.9304	0.8051	0.8096
4050	0.83	3	59.6	sp|Q9Y6B6|SAR1B_HUMAN	GTP-binding protein SAR1b OS=Homo sapiens GN=SAR1B PE=1 SV=1	HUMAN	3	0.7273	0.8167	0.7676	0.8099
2628	4	4.04	16.8	sp|Q99685|MGLL_HUMAN	Monoglyceride lipase OS=Homo sapiens GN=MGLL PE=1 SV=2	HUMAN	2	0.7274	0.8524	0.9946	0.81
996	13.59	30.57	68.5	sp|Q15366|PCBP2_HUMAN	Poly(rC)-binding protein 2 OS=Homo sapiens GN=PCBP2 PE=1 SV=1	HUMAN	32	0.7275	0.8896	0.7501	0.8101
2492	4.04	4.41	49.8	sp|Q96EY4|TMA16_HUMAN	Translation machinery-associated protein 16 OS=Homo sapiens GN=TMA16 PE=1 SV=2	HUMAN	2	0.7276	1.3295	0.7229	0.8106
1169	11.58	11.84	42.1	sp|P54727|RD23B_HUMAN	UV excision repair protein RAD23 homolog B OS=Homo sapiens GN=RAD23B PE=1 SV=1	HUMAN	8	0.7278	0.9979	0.8027	0.8108
3538	2	2.24	16.6	sp|Q96P47|AGAP3_HUMAN	Arf-GAP with GTPase, ANK repeat and PH domain-containing protein 3 OS=Homo sapiens GN=AGAP3 PE=1 SV=2	HUMAN	1	0.7279	0.7643	1.2159	0.8111
3731	2	2.01	27.5	sp|O15514|RPB4_HUMAN	DNA-directed RNA polymerase II subunit RPB4 OS=Homo sapiens GN=POLR2D PE=1 SV=1	HUMAN	1	0.7281	0.9021	0.6631	0.8112
1929	6.17	6.2	34.3	sp|Q15428|SF3A2_HUMAN	Splicing factor 3A subunit 2 OS=Homo sapiens GN=SF3A2 PE=1 SV=2	HUMAN	7	0.7281	0.8358	0.8467	0.8114
3420	2.01	2.12	40.3	sp|Q86TN4|TRPT1_HUMAN	tRNA 2'-phosphotransferase 1 OS=Homo sapiens GN=TRPT1 PE=1 SV=2	HUMAN	1	0.7282	0.8055	0.7362	0.8114
4683	0.09	0.11	20.2	sp|Q6P087|RUSD3_HUMAN	RNA pseudouridylate synthase domain-containing protein 3 OS=Homo sapiens GN=RPUSD3 PE=2 SV=3	HUMAN	0	0.7282	1.0421	0.7486	0.8123
2398	4.23	13.02	46.4	sp|Q13188|STK3_HUMAN	Serine/threonine-protein kinase 3 OS=Homo sapiens GN=STK3 PE=1 SV=2	HUMAN	7	0.7282	1.0225	0.7719	0.8125
2066	5.98	6.03	69.5	sp|Q9Y5L4|TIM13_HUMAN	Mitochondrial import inner membrane translocase subunit Tim13 OS=Homo sapiens GN=TIMM13 PE=1 SV=1	HUMAN	4	0.7283	0.7749	0.7898	0.8125
1410	9.45	9.49	51.2	sp|O95881|TXD12_HUMAN	Thioredoxin domain-containing protein 12 OS=Homo sapiens GN=TXNDC12 PE=1 SV=1	HUMAN	12	0.7284	0.8365	0.8037	0.8128
1342	10.03	10.41	43.7	sp|P08240|SRPR_HUMAN	Signal recognition particle receptor subunit alpha OS=Homo sapiens GN=SRPR PE=1 SV=2	HUMAN	7	0.7285	1.0043	0.6871	0.8129
1981	6.05	6.47	52.2	sp|Q12981|SEC20_HUMAN	Vesicle transport protein SEC20 OS=Homo sapiens GN=BNIP1 PE=1 SV=3	HUMAN	3	0.7288	0.8999	0.9415	0.8132
3686	2	2.02	12.5	sp|Q9NPR9|GP108_HUMAN	Protein GPR108 OS=Homo sapiens GN=GPR108 PE=2 SV=3	HUMAN	1	0.729	0.7976	0.8469	0.8135
2202	5.19	5.65	32.5	sp|Q9HAF1|EAF6_HUMAN	Chromatin modification-related protein MEAF6 OS=Homo sapiens GN=MEAF6 PE=1 SV=1	HUMAN	3	0.7293	0.8481	0.758	0.8135
899	14.8	15.02	63.2	sp|P62851|RS25_HUMAN	40S ribosomal protein S25 OS=Homo sapiens GN=RPS25 PE=1 SV=1	HUMAN	12	0.7295	0.9066	0.746	0.8139
2441	4.11	5.53	26.3	sp|O43299|AP5Z1_HUMAN	AP-5 complex subunit zeta-1 OS=Homo sapiens GN=AP5Z1 PE=1 SV=2	HUMAN	3	0.7295	0.8758	0.9285	0.814
278	33.36	33.66	93.3	sp|P09382|LEG1_HUMAN	Galectin-1 OS=Homo sapiens GN=LGALS1 PE=1 SV=2	HUMAN	51	0.7298	0.9308	0.7479	0.8143
2114	5.7	5.78	11.5	sp|P37198|NUP62_HUMAN	Nuclear pore glycoprotein p62 OS=Homo sapiens GN=NUP62 PE=1 SV=3	HUMAN	4	0.7298	1.0851	0.738	0.8144
1376	9.81	14.61	88.6	sp|P63313|TYB10_HUMAN	Thymosin beta-10 OS=Homo sapiens GN=TMSB10 PE=1 SV=2	HUMAN	13	0.7302	0.9598	0.7068	0.8145
365	27.21	27.58	91	sp|P39019|RS19_HUMAN	40S ribosomal protein S19 OS=Homo sapiens GN=RPS19 PE=1 SV=2	HUMAN	30	0.7306	0.9297	0.7713	0.8145
1806	6.88	7.68	38.2	sp|A2RUS2|DEND3_HUMAN	DENN domain-containing protein 3 OS=Homo sapiens GN=DENND3 PE=1 SV=2	HUMAN	5	0.7307	0.9485	0.7525	0.8145
3456	2.01	2.01	48.2	sp|Q9H939|PPIP2_HUMAN	Proline-serine-threonine phosphatase-interacting protein 2 OS=Homo sapiens GN=PSTPIP2 PE=1 SV=4	HUMAN	1	0.7314	1.0208	1.0109	0.8145
442	24.37	25.15	44.5	sp|P55209|NP1L1_HUMAN	Nucleosome assembly protein 1-like 1 OS=Homo sapiens GN=NAP1L1 PE=1 SV=1	HUMAN	25	0.7315	0.8005	0.7291	0.815
1494	8.75	9.25	58.9	sp|P61758|PFD3_HUMAN	Prefoldin subunit 3 OS=Homo sapiens GN=VBP1 PE=1 SV=3	HUMAN	6	0.7315	0.9601	0.7973	0.8153
4657	0.09	0.4	40.4	sp|Q9H267|VP33B_HUMAN	Vacuolar protein sorting-associated protein 33B OS=Homo sapiens GN=VPS33B PE=1 SV=2	HUMAN	0	0.7315	1.0858	0.8327	0.8154
1709	7.52	9.39	49.7	sp|P61225|RAP2B_HUMAN	Ras-related protein Rap-2b OS=Homo sapiens GN=RAP2B PE=1 SV=1	HUMAN	5	0.7315	1.2838	0.7207	0.8162
2189	5.28	5.56	29.7	sp|Q6ICG6|K0930_HUMAN	Uncharacterized protein KIAA0930 OS=Homo sapiens GN=KIAA0930 PE=1 SV=1	HUMAN	4	0.7318	0.8093	0.6787	0.8166
2108	5.75	6.29	34.7	sp|O14974|MYPT1_HUMAN	Protein phosphatase 1 regulatory subunit 12A OS=Homo sapiens GN=PPP1R12A PE=1 SV=1	HUMAN	4	0.7318	0.9365	0.8316	0.8167
2958	2.62	2.68	33.4	sp|Q92600|RCD1_HUMAN	Cell differentiation protein RCD1 homolog OS=Homo sapiens GN=RQCD1 PE=1 SV=1	HUMAN	3	0.7318	0.8681	1.3308	0.8175
733	17.43	18.24	85.2	sp|P0CW22|RS17L_HUMAN	40S ribosomal protein S17-like OS=Homo sapiens GN=RPS17L PE=3 SV=1	HUMAN	29	0.732	0.9079	0.757	0.8176
4293	0.31	0.45	31.8	sp|Q9H3Z4|DNJC5_HUMAN	DnaJ homolog subfamily C member 5 OS=Homo sapiens GN=DNAJC5 PE=1 SV=1	HUMAN	1	0.7321	1.0426	0.6918	0.8177
2998	2.49	2.56	32.6	sp|P48059|LIMS1_HUMAN	LIM and senescent cell antigen-like-containing domain protein 1 OS=Homo sapiens GN=LIMS1 PE=1 SV=4	HUMAN	2	0.7321	1.0176	0.7851	0.8177
3753	2	2	17.8	sp|Q53FT3|HIKES_HUMAN	Protein Hikeshi OS=Homo sapiens GN=C11orf73 PE=1 SV=2	HUMAN	1	0.7322	0.7764	0.8891	0.8178
4718	0.08	0.19	27.8	sp|Q92636|FAN_HUMAN	Protein FAN OS=Homo sapiens GN=NSMAF PE=1 SV=2	HUMAN	0	0.7323	0.8133	1.0175	0.818
1946	6.12	6.15	59.5	sp|O43665|RGS10_HUMAN	Regulator of G-protein signaling 10 OS=Homo sapiens GN=RGS10 PE=1 SV=2	HUMAN	3	0.7324	0.884	0.8411	0.8183
3467	2	10.07	54.6	sp|Q8WUD1|RAB2B_HUMAN	Ras-related protein Rab-2B OS=Homo sapiens GN=RAB2B PE=1 SV=1	HUMAN	6	0.7327	0.8876	0.8644	0.8184
1358	9.98	13.82	36.8	sp|Q9NRL2|BAZ1A_HUMAN	Bromodomain adjacent to zinc finger domain protein 1A OS=Homo sapiens GN=BAZ1A PE=1 SV=2	HUMAN	9	0.7332	0.7462	0.8346	0.8186
1336	10.04	85.32	86.1	sp|P68371|TBB4B_HUMAN	Tubulin beta-4B chain OS=Homo sapiens GN=TUBB4B PE=1 SV=1	HUMAN	177	0.7332	0.8874	0.7813	0.819
919	14.54	14.71	76.4	sp|P46776|RL27A_HUMAN	60S ribosomal protein L27a OS=Homo sapiens GN=RPL27A PE=1 SV=2	HUMAN	14	0.7334	0.9668	0.7537	0.819
1076	12.64	13.1	46.4	sp|O75475|PSIP1_HUMAN	PC4 and SFRS1-interacting protein OS=Homo sapiens GN=PSIP1 PE=1 SV=1	HUMAN	8	0.7334	1.0047	0.7599	0.8194
3836	1.65	2.39	37.3	sp|Q3SY69|AL1L2_HUMAN	Mitochondrial 10-formyltetrahydrofolate dehydrogenase OS=Homo sapiens GN=ALDH1L2 PE=1 SV=2	HUMAN	1	0.7335	1.0794	0.5509	0.8197
3789	1.83	1.87	13.6	sp|P04150|GCR_HUMAN	Glucocorticoid receptor OS=Homo sapiens GN=NR3C1 PE=1 SV=1	HUMAN	1	0.7335	0.9061	0.8197	0.8201
846	15.54	15.58	94.3	sp|P07108|ACBP_HUMAN	Acyl-CoA-binding protein OS=Homo sapiens GN=DBI PE=1 SV=2	HUMAN	18	0.7337	0.9527	0.8107	0.8206
639	19.21	19.55	43.3	sp|Q5JPE7|NOMO2_HUMAN	Nodal modulator 2 OS=Homo sapiens GN=NOMO2 PE=1 SV=1	HUMAN	12	0.7341	0.8588	0.8296	0.8206
1414	9.43	9.51	65.1	sp|Q8IXM2|BAP18_HUMAN	Chromatin complexes subunit BAP18 OS=Homo sapiens GN=BAP18 PE=1 SV=1	HUMAN	5	0.7341	0.8312	0.8688	0.8207
3313	2.02	2.25	41.5	sp|Q14116|IL18_HUMAN	Interleukin-18 OS=Homo sapiens GN=IL18 PE=1 SV=1	HUMAN	1	0.7342	0.9932	0.6345	0.8209
1945	6.12	6.45	44	sp|Q3KQU3|MA7D1_HUMAN	MAP7 domain-containing protein 1 OS=Homo sapiens GN=MAP7D1 PE=1 SV=1	HUMAN	3	0.7343	0.9282	0.6993	0.8211
2143	5.52	5.63	45.2	sp|Q8N5K1|CISD2_HUMAN	CDGSH iron-sulfur domain-containing protein 2 OS=Homo sapiens GN=CISD2 PE=1 SV=1	HUMAN	5	0.7343	0.7934	0.8699	0.8212
352	27.72	29.05	54.3	sp|P30048|PRDX3_HUMAN	Thioredoxin-dependent peroxide reductase, mitochondrial OS=Homo sapiens GN=PRDX3 PE=1 SV=3	HUMAN	41	0.7343	0.9126	0.7824	0.8213
2022	6.01	6.1	78.4	sp|Q9Y3B4|PM14_HUMAN	Pre-mRNA branch site protein p14 OS=Homo sapiens GN=SF3B14 PE=1 SV=1	HUMAN	7	0.7346	0.8563	0.8446	0.8215
2229	5.05	5.51	26.3	sp|O75044|SRGP2_HUMAN	SLIT-ROBO Rho GTPase-activating protein 2 OS=Homo sapiens GN=SRGAP2 PE=1 SV=2	HUMAN	4	0.7349	0.9099	0.8209	0.8217
4084	0.74	0.77	29.8	sp|Q9NWK9|BCD1_HUMAN	Box C/D snoRNA protein 1 OS=Homo sapiens GN=ZNHIT6 PE=1 SV=1	HUMAN	1	0.7351	0.5569	1.1803	0.8218
4067	0.79	1.06	29.7	sp|Q7LDG7|GRP2_HUMAN	RAS guanyl-releasing protein 2 OS=Homo sapiens GN=RASGRP2 PE=1 SV=1	HUMAN	1	0.7352	0.8242	0.8519	0.8223
1713	7.5	8.19	25.9	sp|Q5JTZ9|SYAM_HUMAN	Alanine--tRNA ligase, mitochondrial OS=Homo sapiens GN=AARS2 PE=1 SV=1	HUMAN	5	0.7355	0.6512	0.7453	0.8224
701	18.03	18.2	55.3	sp|P50552|VASP_HUMAN	Vasodilator-stimulated phosphoprotein OS=Homo sapiens GN=VASP PE=1 SV=3	HUMAN	18	0.7357	0.9184	0.7533	0.8227
1823	6.73	13.96	51.7	sp|Q02750|MP2K1_HUMAN	Dual specificity mitogen-activated protein kinase kinase 1 OS=Homo sapiens GN=MAP2K1 PE=1 SV=2	HUMAN	8	0.7358	0.8266	0.8072	0.8229
1303	10.26	10.67	33.9	sp|Q6Y7W6|PERQ2_HUMAN	PERQ amino acid-rich with GYF domain-containing protein 2 OS=Homo sapiens GN=GIGYF2 PE=1 SV=1	HUMAN	6	0.7361	0.6742	0.9362	0.8231
2594	4	4.23	27.1	sp|P49902|5NTC_HUMAN	Cytosolic purine 5'-nucleotidase OS=Homo sapiens GN=NT5C2 PE=1 SV=1	HUMAN	3	0.7361	0.966	0.819	0.8232
825	15.98	17.19	81	sp|Q9UKY7|CDV3_HUMAN	Protein CDV3 homolog OS=Homo sapiens GN=CDV3 PE=1 SV=1	HUMAN	21	0.7365	0.8944	0.8026	0.8232
3342	2.02	2.03	39.2	sp|Q9BY32|ITPA_HUMAN	Inosine triphosphate pyrophosphatase OS=Homo sapiens GN=ITPA PE=1 SV=2	HUMAN	1	0.7366	0.9044	0.8194	0.8233
2904	2.87	2.88	45.3	sp|P09669|COX6C_HUMAN	Cytochrome c oxidase subunit 6C OS=Homo sapiens GN=COX6C PE=1 SV=2	HUMAN	5	0.7367	0.8348	0.7338	0.8234
1325	10.11	10.13	32.9	sp|P57764|GSDMD_HUMAN	Gasdermin-D OS=Homo sapiens GN=GSDMD PE=1 SV=1	HUMAN	6	0.7372	0.8523	0.7882	0.8237
4152	0.56	0.96	24.6	sp|Q6A163|K1C39_HUMAN	Keratin, type I cytoskeletal 39 OS=Homo sapiens GN=KRT39 PE=1 SV=2	HUMAN	1	0.7373	1.0366	0.9632	0.8238
6	153.41	154.4	84.3	sp|P08238|HS90B_HUMAN	Heat shock protein HSP 90-beta OS=Homo sapiens GN=HSP90AB1 PE=1 SV=4	HUMAN	225	0.7375	0.9204	0.7492	0.8238
4536	0.13	0.19	35.1	RRRRRsp|Q9NZ43|USE1_HUMAN	REVERSED Vesicle transport protein USE1 OS=Homo sapiens GN=USE1 PE=1 SV=2	HUMAN	0	0.7377	0.7082	3.0152	0.8239
1955	6.1	6.3	46.3	sp|Q9UBQ5|EIF3K_HUMAN	Eukaryotic translation initiation factor 3 subunit K OS=Homo sapiens GN=EIF3K PE=1 SV=1	HUMAN	6	0.7382	0.8732	0.7307	0.8239
2807	3.29	3.56	32.9	sp|Q9BQP7|CT072_HUMAN	Uncharacterized protein C20orf72 OS=Homo sapiens GN=C20orf72 PE=1 SV=1	HUMAN	3	0.7382	0.9905	0.8086	0.8245
2070	5.96	6.07	41.7	sp|Q15007|FL2D_HUMAN	Pre-mRNA-splicing regulator WTAP OS=Homo sapiens GN=WTAP PE=1 SV=2	HUMAN	5	0.7386	0.8892	0.6448	0.825
3412	2.01	2.18	35.9	sp|P50336|PPOX_HUMAN	Protoporphyrinogen oxidase OS=Homo sapiens GN=PPOX PE=1 SV=1	HUMAN	1	0.7391	0.9166	0.7625	0.825
2470	4.06	4.99	61.4	sp|Q6NVY1|HIBCH_HUMAN	3-hydroxyisobutyryl-CoA hydrolase, mitochondrial OS=Homo sapiens GN=HIBCH PE=1 SV=2	HUMAN	2	0.7396	1.0912	0.5998	0.8255
1331	10.07	11.34	52.8	sp|P10746|HEM4_HUMAN	Uroporphyrinogen-III synthase OS=Homo sapiens GN=UROS PE=1 SV=1	HUMAN	8	0.7396	0.8983	0.7442	0.8257
3638	2	2.05	14.1	sp|Q9UGU5|HMGX4_HUMAN	HMG domain-containing protein 4 OS=Homo sapiens GN=HMGXB4 PE=2 SV=2	HUMAN	1	0.7397	0.9346	0.6398	0.8261
1187	11.41	12.82	38.6	sp|Q86U44|MTA70_HUMAN	N6-adenosine-methyltransferase 70 kDa subunit OS=Homo sapiens GN=METTL3 PE=1 SV=2	HUMAN	9	0.7397	0.9753	0.752	0.8263
2967	2.59	2.7	18.9	sp|O15379|HDAC3_HUMAN	Histone deacetylase 3 OS=Homo sapiens GN=HDAC3 PE=1 SV=2	HUMAN	3	0.7397	0.9243	0.8828	0.8263
1366	9.9	10.21	25.1	sp|P47712|PA24A_HUMAN	Cytosolic phospholipase A2 OS=Homo sapiens GN=PLA2G4A PE=1 SV=2	HUMAN	5	0.7402	0.9527	0.9036	0.8265
1440	9.23	9.87	25.4	sp|Q5UIP0|RIF1_HUMAN	Telomere-associated protein RIF1 OS=Homo sapiens GN=RIF1 PE=1 SV=2	HUMAN	6	0.7405	0.8985	0.6741	0.8267
2575	4	5.93	24.1	sp|Q32P44|EMAL3_HUMAN	Echinoderm microtubule-associated protein-like 3 OS=Homo sapiens GN=EML3 PE=1 SV=1	HUMAN	3	0.7406	1.0117	0.7273	0.8269
3603	2	2.09	15.7	sp|Q9NRG7|D39U1_HUMAN	Epimerase family protein SDR39U1 OS=Homo sapiens GN=SDR39U1 PE=1 SV=2	HUMAN	1	0.7406	1.3854	0.8062	0.827
223	38.42	41.95	83.3	sp|P23284|PPIB_HUMAN	Peptidyl-prolyl cis-trans isomerase B OS=Homo sapiens GN=PPIB PE=1 SV=2	HUMAN	29	0.7408	0.9363	0.8191	0.8271
2732	3.62	4.13	31	sp|O75503|CLN5_HUMAN	Ceroid-lipofuscinosis neuronal protein 5 OS=Homo sapiens GN=CLN5 PE=1 SV=2	HUMAN	2	0.7408	0.8986	0.923	0.8275
746	17.27	18.16	74.3	sp|P22392|NDKB_HUMAN	Nucleoside diphosphate kinase B OS=Homo sapiens GN=NME2 PE=1 SV=1	HUMAN	18	0.7411	0.9261	0.7221	0.8276
3459	2.01	2.01	29.4	sp|Q15382|RHEB_HUMAN	GTP-binding protein Rheb OS=Homo sapiens GN=RHEB PE=1 SV=1	HUMAN	1	0.7414	0.9675	0.7241	0.8277
1781	6.99	7.21	41.1	sp|Q69YN2|C19L1_HUMAN	CWF19-like protein 1 OS=Homo sapiens GN=CWF19L1 PE=1 SV=2	HUMAN	5	0.7414	0.9703	0.8944	0.8278
3002	2.48	2.68	49.3	sp|O60869|EDF1_HUMAN	Endothelial differentiation-related factor 1 OS=Homo sapiens GN=EDF1 PE=1 SV=1	HUMAN	3	0.7416	0.8133	0.7498	0.828
2115	5.7	5.71	43.7	sp|Q9Y6H1|CHCH2_HUMAN	Coiled-coil-helix-coiled-coil-helix domain-containing protein 2, mitochondrial OS=Homo sapiens GN=CHCHD2 PE=1 SV=1	HUMAN	3	0.7417	0.717	0.7164	0.828
3478	2	2.74	32.9	sp|Q9UKW4|VAV3_HUMAN	Guanine nucleotide exchange factor VAV3 OS=Homo sapiens GN=VAV3 PE=1 SV=1	HUMAN	3	0.7418	0.4083	1.3608	0.8283
3255	2.04	2.15	26.2	sp|O95243|MBD4_HUMAN	Methyl-CpG-binding domain protein 4 OS=Homo sapiens GN=MBD4 PE=1 SV=1	HUMAN	1	0.7419	0.5903	0.9402	0.8284
552	21.06	21.1	84.1	sp|P25398|RS12_HUMAN	40S ribosomal protein S12 OS=Homo sapiens GN=RPS12 PE=1 SV=3	HUMAN	19	0.7419	0.9259	0.769	0.8286
1954	6.1	6.44	31.8	sp|Q9P0I2|EMC3_HUMAN	ER membrane protein complex subunit 3 OS=Homo sapiens GN=EMC3 PE=1 SV=3	HUMAN	5	0.742	0.7976	0.8928	0.8287
3430	2.01	2.08	33.8	sp|O96005|CLPT1_HUMAN	Cleft lip and palate transmembrane protein 1 OS=Homo sapiens GN=CLPTM1 PE=1 SV=1	HUMAN	2	0.7422	0.916	0.7425	0.8288
257	35.47	54.49	90.1	sp|P16403|H12_HUMAN	Histone H1.2 OS=Homo sapiens GN=HIST1H1C PE=1 SV=2	HUMAN	35	0.7423	0.9643	0.785	0.829
1887	6.34	26.09	66.8	sp|P12236|ADT3_HUMAN	ADP/ATP translocase 3 OS=Homo sapiens GN=SLC25A6 PE=1 SV=4	HUMAN	18	0.7424	0.9185	0.7767	0.829
1994	6.04	6.04	65.6	sp|P80297|MT1X_HUMAN	Metallothionein-1X OS=Homo sapiens GN=MT1X PE=1 SV=1	HUMAN	3	0.7426	0.8578	0.8319	0.8291
880	15.06	16.69	41.3	sp|Q96TA2|YMEL1_HUMAN	ATP-dependent zinc metalloprotease YME1L1 OS=Homo sapiens GN=YME1L1 PE=1 SV=2	HUMAN	8	0.7434	0.8783	0.7189	0.8291
2404	4.2	4.37	30.8	sp|O94927|HAUS5_HUMAN	HAUS augmin-like complex subunit 5 OS=Homo sapiens GN=HAUS5 PE=1 SV=2	HUMAN	2	0.7434	1.2702	0.7063	0.8293
3097	2.24	2.55	19.4	sp|P54687|BCAT1_HUMAN	Branched-chain-amino-acid aminotransferase, cytosolic OS=Homo sapiens GN=BCAT1 PE=1 SV=3	HUMAN	2	0.7435	0.8602	0.7658	0.8295
283	32.6	34.51	78.5	sp|Q9HB71|CYBP_HUMAN	Calcyclin-binding protein OS=Homo sapiens GN=CACYBP PE=1 SV=2	HUMAN	30	0.7437	1.0089	0.82	0.8295
2756	3.53	3.54	27.4	sp|O43709|WBS22_HUMAN	Uncharacterized methyltransferase WBSCR22 OS=Homo sapiens GN=WBSCR22 PE=1 SV=2	HUMAN	3	0.7444	0.8141	0.8082	0.8297
650	18.87	20.5	45.7	sp|P08195|4F2_HUMAN	4F2 cell-surface antigen heavy chain OS=Homo sapiens GN=SLC3A2 PE=1 SV=3	HUMAN	11	0.7445	0.9493	0.7953	0.8301
1867	6.45	6.82	30.6	sp|Q5SW79|CE170_HUMAN	Centrosomal protein of 170 kDa OS=Homo sapiens GN=CEP170 PE=1 SV=1	HUMAN	4	0.7446	0.8728	0.7869	0.8302
1543	8.37	9.48	35.2	sp|O14920|IKKB_HUMAN	Inhibitor of nuclear factor kappa-B kinase subunit beta OS=Homo sapiens GN=IKBKB PE=1 SV=1	HUMAN	5	0.7447	1.0265	0.7718	0.8303
3426	2.01	2.1	33.1	sp|Q8N129|CNPY4_HUMAN	Protein canopy homolog 4 OS=Homo sapiens GN=CNPY4 PE=2 SV=1	HUMAN	1	0.7448	0.7883	0.8417	0.8304
816	16.12	16.39	64.1	sp|P18621|RL17_HUMAN	60S ribosomal protein L17 OS=Homo sapiens GN=RPL17 PE=1 SV=3	HUMAN	14	0.745	0.9513	0.746	0.8307
1020	13.32	13.7	67.7	sp|P49721|PSB2_HUMAN	Proteasome subunit beta type-2 OS=Homo sapiens GN=PSMB2 PE=1 SV=1	HUMAN	7	0.7453	1.0401	0.7142	0.8307
1096	12.38	13.03	52.8	sp|P51665|PSD7_HUMAN	26S proteasome non-ATPase regulatory subunit 7 OS=Homo sapiens GN=PSMD7 PE=1 SV=2	HUMAN	9	0.7453	0.9501	0.8414	0.8308
2939	2.72	2.83	34.1	sp|Q6P1N0|C2D1A_HUMAN	Coiled-coil and C2 domain-containing protein 1A OS=Homo sapiens GN=CC2D1A PE=1 SV=1	HUMAN	2	0.7454	0.8951	0.824	0.831
1690	7.63	16.09	62.7	sp|O75477|ERLN1_HUMAN	Erlin-1 OS=Homo sapiens GN=ERLIN1 PE=1 SV=1	HUMAN	9	0.7454	1.1203	0.7072	0.8312
431	24.83	24.89	84.5	sp|P33316|DUT_HUMAN	Deoxyuridine 5'-triphosphate nucleotidohydrolase, mitochondrial OS=Homo sapiens GN=DUT PE=1 SV=4	HUMAN	29	0.7455	0.9323	0.7748	0.8312
1191	11.38	12.07	39.7	sp|Q8WWY3|PRP31_HUMAN	U4/U6 small nuclear ribonucleoprotein Prp31 OS=Homo sapiens GN=PRPF31 PE=1 SV=2	HUMAN	8	0.7459	1.0134	0.8339	0.8312
25	93.05	93.3	89.9	sp|P63261|ACTG_HUMAN	Actin, cytoplasmic 2 OS=Homo sapiens GN=ACTG1 PE=1 SV=1	HUMAN	234	0.7461	0.8888	0.7957	0.8313
4252	0.37	0.44	27	sp|O95376|ARI2_HUMAN	E3 ubiquitin-protein ligase ARIH2 OS=Homo sapiens GN=ARIH2 PE=1 SV=1	HUMAN	0	0.7462	0.9234	1.0375	0.8314
2314	4.64	4.68	39.3	sp|P62841|RS15_HUMAN	40S ribosomal protein S15 OS=Homo sapiens GN=RPS15 PE=1 SV=2	HUMAN	17	0.7463	0.8315	0.7268	0.8316
22	98.99	99.25	90.8	sp|P04406|G3P_HUMAN	Glyceraldehyde-3-phosphate dehydrogenase OS=Homo sapiens GN=GAPDH PE=1 SV=3	HUMAN	207	0.7464	0.9278	0.7747	0.8321
3193	2.09	2.14	11.8	sp|Q9C037|TRIM4_HUMAN	Tripartite motif-containing protein 4 OS=Homo sapiens GN=TRIM4 PE=2 SV=2	HUMAN	1	0.7468	0.6898	1.0226	0.8322
1472	8.94	11.04	31.2	sp|P07477|TRY1_HUMAN	Trypsin-1 OS=Homo sapiens GN=PRSS1 PE=1 SV=1	HUMAN	14	0.7469	0.9603	0.7652	0.8323
4964	0.05	0.15	35.5	RRRRRsp|Q92616|GCN1L_HUMAN	REVERSED Translational activator GCN1 OS=Homo sapiens GN=GCN1L1 PE=1 SV=6	HUMAN	0	0.747	0.6136	5.6169	0.8326
4492	0.14	2.26	28.1	sp|Q9HC98|NEK6_HUMAN	Serine/threonine-protein kinase Nek6 OS=Homo sapiens GN=NEK6 PE=1 SV=2	HUMAN	1	0.7471	0.9791	0.7891	0.8329
473	23.18	23.74	54.9	sp|O60832|DKC1_HUMAN	H/ACA ribonucleoprotein complex subunit 4 OS=Homo sapiens GN=DKC1 PE=1 SV=3	HUMAN	16	0.7471	1.1014	0.7683	0.833
2212	5.14	5.72	36	sp|O15381|NVL_HUMAN	Nuclear valosin-containing protein-like OS=Homo sapiens GN=NVL PE=1 SV=1	HUMAN	4	0.7474	0.8353	0.9582	0.8332
2551	4.01	4.24	29.6	sp|Q15542|TAF5_HUMAN	Transcription initiation factor TFIID subunit 5 OS=Homo sapiens GN=TAF5 PE=1 SV=3	HUMAN	2	0.7475	0.7809	0.8442	0.8335
2363	4.36	5.4	35.4	sp|Q9UBB4|ATX10_HUMAN	Ataxin-10 OS=Homo sapiens GN=ATXN10 PE=1 SV=1	HUMAN	4	0.7476	0.9506	0.6725	0.8336
1239	10.8	11.65	21.9	sp|O15294|OGT1_HUMAN	UDP-N-acetylglucosamine--peptide N-acetylglucosaminyltransferase 110 kDa subunit OS=Homo sapiens GN=OGT PE=1 SV=3	HUMAN	6	0.7478	1.1162	0.6056	0.834
665	18.61	23.58	79.7	sp|P29692|EF1D_HUMAN	Elongation factor 1-delta OS=Homo sapiens GN=EEF1D PE=1 SV=5	HUMAN	20	0.7479	0.9164	0.7939	0.8341
2057	6	6.02	36.2	sp|Q9UNI6|DUS12_HUMAN	Dual specificity protein phosphatase 12 OS=Homo sapiens GN=DUSP12 PE=1 SV=1	HUMAN	3	0.748	1.0343	0.7012	0.8342
711	17.87	18.06	63.6	sp|P40429|RL13A_HUMAN	60S ribosomal protein L13a OS=Homo sapiens GN=RPL13A PE=1 SV=2	HUMAN	11	0.7483	0.9348	0.8252	0.8346
1352	10	10.22	38.2	sp|Q8WUX9|CHMP7_HUMAN	Charged multivesicular body protein 7 OS=Homo sapiens GN=CHMP7 PE=1 SV=1	HUMAN	5	0.7485	0.8867	0.6747	0.8347
1756	7.18	9.1	34.1	sp|Q9UKV8|AGO2_HUMAN	Protein argonaute-2 OS=Homo sapiens GN=EIF2C2 PE=1 SV=3	HUMAN	7	0.7485	0.7027	0.9931	0.8349
2258	4.9	5.19	28.6	sp|Q9BV44|THUM3_HUMAN	THUMP domain-containing protein 3 OS=Homo sapiens GN=THUMPD3 PE=1 SV=1	HUMAN	3	0.7486	0.9965	0.7218	0.8351
3564	2	2.18	26.4	sp|P13164|IFM1_HUMAN	Interferon-induced transmembrane protein 1 OS=Homo sapiens GN=IFITM1 PE=1 SV=3	HUMAN	2	0.7488	1.0069	1.0103	0.8353
4095	0.71	0.74	21	sp|Q8N567|ZCHC9_HUMAN	Zinc finger CCHC domain-containing protein 9 OS=Homo sapiens GN=ZCCHC9 PE=2 SV=2	HUMAN	1	0.7492	1.0112	0.9135	0.8355
287	32.07	36.97	71.6	sp|P62191|PRS4_HUMAN	26S protease regulatory subunit 4 OS=Homo sapiens GN=PSMC1 PE=1 SV=1	HUMAN	28	0.7493	0.8828	0.8133	0.8356
3820	1.7	1.83	23.7	sp|P13762|DRB4_HUMAN	HLA class II histocompatibility antigen, DR beta 4 chain OS=Homo sapiens GN=HLA-DRB4 PE=1 SV=2	HUMAN	1	0.7497	1.0728	0.6338	0.8357
3045	2.37	2.51	22.5	sp|Q9NRA8|4ET_HUMAN	Eukaryotic translation initiation factor 4E transporter OS=Homo sapiens GN=EIF4ENIF1 PE=1 SV=2	HUMAN	2	0.7497	1.0237	0.7009	0.836
2236	5.02	5.08	17	sp|Q9BVL2|NUPL1_HUMAN	Nucleoporin p58/p45 OS=Homo sapiens GN=NUPL1 PE=1 SV=1	HUMAN	3	0.7497	0.9829	0.9282	0.8362
772	16.86	17.76	63	sp|Q9P289|MST4_HUMAN	Serine/threonine-protein kinase MST4 OS=Homo sapiens GN=MST4 PE=1 SV=2	HUMAN	11	0.7499	1.0326	0.7585	0.8366
1695	7.6	11.97	48.6	sp|Q5VTR2|BRE1A_HUMAN	E3 ubiquitin-protein ligase BRE1A OS=Homo sapiens GN=RNF20 PE=1 SV=2	HUMAN	7	0.75	0.7545	0.8115	0.8372
88	61.31	61.52	96.4	sp|P23528|COF1_HUMAN	Cofilin-1 OS=Homo sapiens GN=CFL1 PE=1 SV=3	HUMAN	74	0.75	0.9668	0.8121	0.8373
2648	4	4.01	42.8	sp|P53801|PTTG_HUMAN	Pituitary tumor-transforming gene 1 protein-interacting protein OS=Homo sapiens GN=PTTG1IP PE=1 SV=1	HUMAN	2	0.7502	1.1481	0.8806	0.8374
4879	0.06	0.09	15.1	sp|Q8N4P3|MESH1_HUMAN	Guanosine-3',5'-bis(diphosphate) 3'-pyrophosphohydrolase MESH1 OS=Homo sapiens GN=HDDC3 PE=1 SV=3	HUMAN	0	0.7505	0.4151	1.2931	0.8375
1348	10.01	10.05	53.4	sp|Q13526|PIN1_HUMAN	Peptidyl-prolyl cis-trans isomerase NIMA-interacting 1 OS=Homo sapiens GN=PIN1 PE=1 SV=1	HUMAN	9	0.7506	0.8666	0.7633	0.8376
3161	2.13	2.2	20.1	sp|O95714|HERC2_HUMAN	E3 ubiquitin-protein ligase HERC2 OS=Homo sapiens GN=HERC2 PE=1 SV=2	HUMAN	3	0.7508	0.7305	0.8111	0.8376
3751	2	2	39	sp|Q86TS9|RM52_HUMAN	39S ribosomal protein L52, mitochondrial OS=Homo sapiens GN=MRPL52 PE=2 SV=2	HUMAN	1	0.751	1.1603	0.7532	0.8378
3530	2	2.26	18.9	sp|Q9Y5S1|TRPV2_HUMAN	Transient receptor potential cation channel subfamily V member 2 OS=Homo sapiens GN=TRPV2 PE=1 SV=1	HUMAN	1	0.751	1.4214	0.8175	0.8378
3634	2	2.05	35.8	sp|P0C5J1|F86B2_HUMAN	Protein FAM86B2 OS=Homo sapiens GN=FAM86B2 PE=2 SV=1	HUMAN	1	0.7511	0.3136	1.2231	0.8378
2535	4.01	4.74	18.5	sp|Q9BTW9|TBCD_HUMAN	Tubulin-specific chaperone D OS=Homo sapiens GN=TBCD PE=1 SV=2	HUMAN	3	0.7511	0.9334	1.0713	0.8384
4048	0.85	0.85	45.9	sp|P12074|CX6A1_HUMAN	Cytochrome c oxidase subunit 6A1, mitochondrial OS=Homo sapiens GN=COX6A1 PE=1 SV=4	HUMAN	1	0.7512	0.9875	0.9694	0.8384
3889	1.43	1.46	24.4	sp|Q9Y3S2|ZN330_HUMAN	Zinc finger protein 330 OS=Homo sapiens GN=ZNF330 PE=1 SV=1	HUMAN	1	0.7512	1.1663	1.0027	0.8391
2393	4.24	5.75	31.6	sp|Q9UPU7|TBD2B_HUMAN	TBC1 domain family member 2B OS=Homo sapiens GN=TBC1D2B PE=1 SV=2	HUMAN	2	0.7513	0.9364	0.814	0.8396
3593	2	2.1	22.5	sp|Q8NCG7|DGLB_HUMAN	Sn1-specific diacylglycerol lipase beta OS=Homo sapiens GN=DAGLB PE=1 SV=2	HUMAN	1	0.7513	1.03	0.901	0.84
677	18.39	20.11	57.8	sp|P43034|LIS1_HUMAN	Platelet-activating factor acetylhydrolase IB subunit alpha OS=Homo sapiens GN=PAFAH1B1 PE=1 SV=2	HUMAN	13	0.7515	0.8426	0.8942	0.8401
808	16.22	17.02	48	sp|Q9NTJ5|SAC1_HUMAN	Phosphatidylinositide phosphatase SAC1 OS=Homo sapiens GN=SACM1L PE=1 SV=2	HUMAN	9	0.7516	0.8593	0.8462	0.8405
4053	0.82	2.66	25.3	sp|O14727|APAF_HUMAN	Apoptotic protease-activating factor 1 OS=Homo sapiens GN=APAF1 PE=1 SV=2	HUMAN	3	0.7517	0.7636	0.5471	0.8405
1652	7.93	9.05	53.6	sp|Q9H444|CHM4B_HUMAN	Charged multivesicular body protein 4b OS=Homo sapiens GN=CHMP4B PE=1 SV=1	HUMAN	5	0.7517	0.9057	0.8336	0.8407
486	22.84	25.21	44.6	sp|P33121|ACSL1_HUMAN	Long-chain-fatty-acid--CoA ligase 1 OS=Homo sapiens GN=ACSL1 PE=1 SV=1	HUMAN	18	0.7518	0.957	0.7744	0.8408
40	83.68	86.75	80.7	sp|P31948|STIP1_HUMAN	Stress-induced-phosphoprotein 1 OS=Homo sapiens GN=STIP1 PE=1 SV=1	HUMAN	68	0.7519	0.9698	0.7798	0.841
298	31.26	31.8	84.1	sp|P52566|GDIR2_HUMAN	Rho GDP-dissociation inhibitor 2 OS=Homo sapiens GN=ARHGDIB PE=1 SV=3	HUMAN	29	0.7522	0.9828	0.8155	0.8416
4370	0.23	0.24	16.6	sp|Q9BQB6|VKOR1_HUMAN	Vitamin K epoxide reductase complex subunit 1 OS=Homo sapiens GN=VKORC1 PE=1 SV=1	HUMAN	0	0.7523	0.6788	0.7497	0.8416
4233	0.4	0.43	24.3	sp|P49674|KC1E_HUMAN	Casein kinase I isoform epsilon OS=Homo sapiens GN=CSNK1E PE=1 SV=1	HUMAN	1	0.7524	0.754	0.873	0.8419
2213	5.14	5.59	34.2	sp|Q8TEU7|RPGF6_HUMAN	Rap guanine nucleotide exchange factor 6 OS=Homo sapiens GN=RAPGEF6 PE=1 SV=2	HUMAN	3	0.7525	0.7599	0.9425	0.8423
1480	8.88	8.98	43.2	sp|Q9H3N1|TMX1_HUMAN	Thioredoxin-related transmembrane protein 1 OS=Homo sapiens GN=TMX1 PE=1 SV=1	HUMAN	8	0.7525	0.9492	0.7858	0.8423
2698	3.77	4.41	12.2	sp|Q9H1C4|UN93B_HUMAN	Protein unc-93 homolog B1 OS=Homo sapiens GN=UNC93B1 PE=1 SV=2	HUMAN	3	0.7525	0.9237	0.8475	0.8424
858	15.38	15.65	73.1	sp|P61019|RAB2A_HUMAN	Ras-related protein Rab-2A OS=Homo sapiens GN=RAB2A PE=1 SV=1	HUMAN	12	0.7527	0.8804	0.7527	0.8427
1527	8.49	8.94	41.5	sp|Q9H6Z4|RANB3_HUMAN	Ran-binding protein 3 OS=Homo sapiens GN=RANBP3 PE=1 SV=1	HUMAN	4	0.7527	0.9144	0.8217	0.8428
735	17.42	19.76	73.3	sp|P46783|RS10_HUMAN	40S ribosomal protein S10 OS=Homo sapiens GN=RPS10 PE=1 SV=1	HUMAN	16	0.7528	0.9473	0.8203	0.8436
2859	3.06	3.61	32.7	sp|Q9H5Z1|DHX35_HUMAN	Probable ATP-dependent RNA helicase DHX35 OS=Homo sapiens GN=DHX35 PE=1 SV=2	HUMAN	2	0.7531	0.9542	0.7021	0.8439
1622	8.01	8.01	41.5	sp|P19387|RPB3_HUMAN	DNA-directed RNA polymerase II subunit RPB3 OS=Homo sapiens GN=POLR2C PE=1 SV=2	HUMAN	5	0.7531	0.8857	0.8962	0.8439
2140	5.54	5.86	36.8	sp|Q96AT9|RPE_HUMAN	Ribulose-phosphate 3-epimerase OS=Homo sapiens GN=RPE PE=1 SV=1	HUMAN	6	0.7531	1.0365	0.8709	0.844
102	56.57	58.15	46.6	sp|P26358|DNMT1_HUMAN	DNA (cytosine-5)-methyltransferase 1 OS=Homo sapiens GN=DNMT1 PE=1 SV=2	HUMAN	32	0.7532	0.8914	0.7544	0.844
2248	4.96	5.08	37.7	sp|P52788|SPSY_HUMAN	Spermine synthase OS=Homo sapiens GN=SMS PE=1 SV=2	HUMAN	3	0.7532	1.0657	0.7694	0.844
360	27.34	27.49	84.6	sp|P62158|CALM_HUMAN	Calmodulin OS=Homo sapiens GN=CALM1 PE=1 SV=2	HUMAN	32	0.7533	0.9231	0.7808	0.8442
413	25.46	25.74	83.6	sp|P43487|RANG_HUMAN	Ran-specific GTPase-activating protein OS=Homo sapiens GN=RANBP1 PE=1 SV=1	HUMAN	29	0.7533	0.9282	0.8328	0.8442
870	15.2	18.78	55.4	sp|P78344|IF4G2_HUMAN	Eukaryotic translation initiation factor 4 gamma 2 OS=Homo sapiens GN=EIF4G2 PE=1 SV=1	HUMAN	9	0.7541	0.892	0.7137	0.8442
3475	2	2.81	27	sp|Q70CQ2|UBP34_HUMAN	Ubiquitin carboxyl-terminal hydrolase 34 OS=Homo sapiens GN=USP34 PE=1 SV=2	HUMAN	5	0.7541	0.7852	0.8209	0.8447
871	15.19	15.36	62.2	sp|P62910|RL32_HUMAN	60S ribosomal protein L32 OS=Homo sapiens GN=RPL32 PE=1 SV=2	HUMAN	14	0.7541	0.9246	0.7883	0.8447
2244	4.97	5.2	20	sp|Q5T6F2|UBAP2_HUMAN	Ubiquitin-associated protein 2 OS=Homo sapiens GN=UBAP2 PE=1 SV=1	HUMAN	5	0.7544	0.5869	0.8438	0.8449
3142	2.16	2.47	19.2	sp|Q27J81|INF2_HUMAN	Inverted formin-2 OS=Homo sapiens GN=INF2 PE=1 SV=2	HUMAN	2	0.7545	0.9188	0.7053	0.8452
2630	4	4.03	43.6	sp|P49642|PRI1_HUMAN	DNA primase small subunit OS=Homo sapiens GN=PRIM1 PE=1 SV=1	HUMAN	2	0.7545	1.0287	0.9482	0.8455
1123	12.09	12.54	36.1	sp|Q9H9J2|RM44_HUMAN	39S ribosomal protein L44, mitochondrial OS=Homo sapiens GN=MRPL44 PE=1 SV=1	HUMAN	7	0.7548	0.9652	0.7022	0.8458
1817	6.79	7.92	45.7	sp|Q13948|CASP_HUMAN	Protein CASP OS=Homo sapiens GN=CUX1 PE=1 SV=2	HUMAN	4	0.7549	0.9338	0.9409	0.8459
13	123.77	125.58	75.6	sp|P13639|EF2_HUMAN	Elongation factor 2 OS=Homo sapiens GN=EEF2 PE=1 SV=4	HUMAN	139	0.7554	0.911	0.7902	0.846
2250	4.95	5.07	39.6	sp|Q9BTE6|AASD1_HUMAN	Alanyl-tRNA editing protein Aarsd1 OS=Homo sapiens GN=AARSD1 PE=1 SV=2	HUMAN	3	0.756	0.8844	0.6747	0.846
1775	7.01	7.87	37.6	sp|P29372|3MG_HUMAN	DNA-3-methyladenine glycosylase OS=Homo sapiens GN=MPG PE=1 SV=3	HUMAN	4	0.7561	0.9253	0.8651	0.8461
3054	2.35	2.39	39.6	sp|P35754|GLRX1_HUMAN	Glutaredoxin-1 OS=Homo sapiens GN=GLRX PE=1 SV=2	HUMAN	3	0.7563	1.4787	0.8234	0.8461
3280	2.03	2.21	32.5	sp|Q9NX74|DUS2L_HUMAN	tRNA-dihydrouridine(20) synthase [NAD(P)+]-like OS=Homo sapiens GN=DUS2L PE=1 SV=1	HUMAN	1	0.7564	0.7557	0.9449	0.8462
2410	4.19	4.23	25.8	sp|O14773|TPP1_HUMAN	Tripeptidyl-peptidase 1 OS=Homo sapiens GN=TPP1 PE=1 SV=2	HUMAN	5	0.7565	0.8134	0.8253	0.8464
497	22.43	22.58	83.6	sp|P24534|EF1B_HUMAN	Elongation factor 1-beta OS=Homo sapiens GN=EEF1B2 PE=1 SV=3	HUMAN	20	0.7569	0.9901	0.8206	0.8465
3106	2.21	2.58	26.4	sp|O14523|C2C2L_HUMAN	C2 domain-containing protein 2-like OS=Homo sapiens GN=C2CD2L PE=1 SV=3	HUMAN	1	0.757	1.1064	0.6566	0.8468
4182	0.5	0.51	16	sp|Q04206|TF65_HUMAN	Transcription factor p65 OS=Homo sapiens GN=RELA PE=1 SV=2	HUMAN	1	0.757	1.0765	0.7882	0.8472
4289	0.31	1.37	31.7	sp|Q9Y4B6|VPRBP_HUMAN	Protein VPRBP OS=Homo sapiens GN=VPRBP PE=1 SV=3	HUMAN	2	0.7574	0.8967	0.891	0.8473
3550	2	2.21	20.4	sp|Q9BXJ8|T120A_HUMAN	Transmembrane protein 120A OS=Homo sapiens GN=TMEM120A PE=2 SV=1	HUMAN	1	0.7575	1.2952	0.2042	0.8473
76	65.35	66.76	74	sp|P36578|RL4_HUMAN	60S ribosomal protein L4 OS=Homo sapiens GN=RPL4 PE=1 SV=5	HUMAN	58	0.7577	0.9493	0.8221	0.8474
3132	2.17	7.9	47.3	sp|Q15286|RAB35_HUMAN	Ras-related protein Rab-35 OS=Homo sapiens GN=RAB35 PE=1 SV=1	HUMAN	5	0.7578	1.093	0.8228	0.8478
2755	3.53	3.56	33.3	sp|P15927|RFA2_HUMAN	Replication protein A 32 kDa subunit OS=Homo sapiens GN=RPA2 PE=1 SV=1	HUMAN	2	0.7579	1.0194	0.7691	0.8478
824	16	16.05	71.2	sp|P45973|CBX5_HUMAN	Chromobox protein homolog 5 OS=Homo sapiens GN=CBX5 PE=1 SV=1	HUMAN	15	0.7579	0.9953	0.8195	0.8479
3628	2	2.06	17.8	sp|Q8NAF0|ZN579_HUMAN	Zinc finger protein 579 OS=Homo sapiens GN=ZNF579 PE=1 SV=2	HUMAN	1	0.7581	0.8496	0.8993	0.8482
878	15.1	15.7	66.8	sp|O75937|DNJC8_HUMAN	DnaJ homolog subfamily C member 8 OS=Homo sapiens GN=DNAJC8 PE=1 SV=2	HUMAN	9	0.7581	0.9717	0.8171	0.8482
608	19.82	20.71	35.4	sp|Q8NBJ5|GT251_HUMAN	Procollagen galactosyltransferase 1 OS=Homo sapiens GN=GLT25D1 PE=1 SV=1	HUMAN	17	0.7581	0.9919	0.8205	0.8483
1363	9.92	16.28	25.3	sp|Q13107|UBP4_HUMAN	Ubiquitin carboxyl-terminal hydrolase 4 OS=Homo sapiens GN=USP4 PE=1 SV=3	HUMAN	9	0.7582	0.7383	0.7341	0.8483
2898	2.89	2.94	85.5	sp|P14406|CX7A2_HUMAN	Cytochrome c oxidase subunit 7A2, mitochondrial OS=Homo sapiens GN=COX7A2 PE=1 SV=1	HUMAN	5	0.7585	1.0369	0.7652	0.8485
67	67.44	68.37	69.7	sp|P11940|PABP1_HUMAN	Polyadenylate-binding protein 1 OS=Homo sapiens GN=PABPC1 PE=1 SV=2	HUMAN	63	0.7586	0.8792	0.7807	0.8486
1999	6.03	6.41	29.2	sp|Q8WUQ7|CATIN_HUMAN	Cactin OS=Homo sapiens GN=CACTIN PE=1 SV=3	HUMAN	3	0.7588	1.0574	0.7705	0.8488
184	42.29	42.77	62.1	sp|P07910|HNRPC_HUMAN	Heterogeneous nuclear ribonucleoproteins C1/C2 OS=Homo sapiens GN=HNRNPC PE=1 SV=4	HUMAN	41	0.7588	0.9879	0.8391	0.8489
3422	2.01	2.11	37.6	sp|P51649|SSDH_HUMAN	Succinate-semialdehyde dehydrogenase, mitochondrial OS=Homo sapiens GN=ALDH5A1 PE=1 SV=2	HUMAN	1	0.7589	1.255	0.6179	0.8493
1388	9.7	10.02	30.6	sp|Q9BTT0|AN32E_HUMAN	Acidic leucine-rich nuclear phosphoprotein 32 family member E OS=Homo sapiens GN=ANP32E PE=1 SV=1	HUMAN	5	0.7592	0.9238	0.7096	0.8494
2577	4	5.36	30	sp|Q8N142|PURA1_HUMAN	Adenylosuccinate synthetase isozyme 1 OS=Homo sapiens GN=ADSSL1 PE=1 SV=1	HUMAN	3	0.7592	0.9661	0.7381	0.8495
1234	10.86	11.14	37.9	sp|Q06124|PTN11_HUMAN	Tyrosine-protein phosphatase non-receptor type 11 OS=Homo sapiens GN=PTPN11 PE=1 SV=2	HUMAN	6	0.7593	0.9002	0.7001	0.8495
1991	6.04	6.19	28.2	sp|P07332|FES_HUMAN	Tyrosine-protein kinase Fes/Fps OS=Homo sapiens GN=FES PE=1 SV=3	HUMAN	3	0.7593	0.8003	0.8065	0.8497
1966	6.08	6.14	45	sp|O75940|SPF30_HUMAN	Survival of motor neuron-related-splicing factor 30 OS=Homo sapiens GN=SMNDC1 PE=1 SV=1	HUMAN	5	0.7593	0.8785	0.7742	0.8499
1856	6.5	7.29	44.1	sp|Q96GQ7|DDX27_HUMAN	Probable ATP-dependent RNA helicase DDX27 OS=Homo sapiens GN=DDX27 PE=1 SV=2	HUMAN	6	0.7595	0.9845	0.7795	0.8501
3084	2.28	2.31	28.3	sp|P53602|MVD1_HUMAN	Diphosphomevalonate decarboxylase OS=Homo sapiens GN=MVD PE=1 SV=1	HUMAN	3	0.7595	1.0395	0.8865	0.8503
2595	4	4.23	16.9	sp|Q99467|CD180_HUMAN	CD180 antigen OS=Homo sapiens GN=CD180 PE=1 SV=2	HUMAN	3	0.7597	0.8065	0.8178	0.8504
1122	12.09	14.22	90.4	sp|P05386|RLA1_HUMAN	60S acidic ribosomal protein P1 OS=Homo sapiens GN=RPLP1 PE=1 SV=1	HUMAN	20	0.7598	0.9578	0.7336	0.8507
2785	3.39	3.46	56.1	sp|Q9NRV9|HEBP1_HUMAN	Heme-binding protein 1 OS=Homo sapiens GN=HEBP1 PE=1 SV=1	HUMAN	4	0.7599	1.0092	0.7946	0.8511
956	14.05	14.17	43.2	sp|Q02338|BDH_HUMAN	D-beta-hydroxybutyrate dehydrogenase, mitochondrial OS=Homo sapiens GN=BDH1 PE=1 SV=3	HUMAN	7	0.76	0.9274	0.7502	0.8511
499	22.41	37.12	84.6	sp|P31946|1433B_HUMAN	14-3-3 protein beta/alpha OS=Homo sapiens GN=YWHAB PE=1 SV=3	HUMAN	44	0.7601	0.9458	0.8522	0.8512
1854	6.52	6.65	34.4	sp|Q8WUA2|PPIL4_HUMAN	Peptidyl-prolyl cis-trans isomerase-like 4 OS=Homo sapiens GN=PPIL4 PE=1 SV=1	HUMAN	6	0.7602	1.0558	0.7816	0.8515
4340	0.25	0.84	35.7	sp|Q9UM54|MYO6_HUMAN	Unconventional myosin-VI OS=Homo sapiens GN=MYO6 PE=1 SV=4	HUMAN	0	0.7604	1.1119	0.5901	0.8516
2126	5.61	5.75	56.5	sp|P62854|RS26_HUMAN	40S ribosomal protein S26 OS=Homo sapiens GN=RPS26 PE=1 SV=3	HUMAN	7	0.7605	1.0265	0.866	0.8518
4671	0.09	0.22	24.6	sp|Q99569|PKP4_HUMAN	Plakophilin-4 OS=Homo sapiens GN=PKP4 PE=1 SV=2	HUMAN	0	0.7605	0.9353	6.8855	0.8519
3759	2	2	19	sp|O75438|NDUB1_HUMAN	NADH dehydrogenase [ubiquinone] 1 beta subcomplex subunit 1 OS=Homo sapiens GN=NDUFB1 PE=1 SV=1	HUMAN	1	0.7607	1.0381	0.8387	0.8524
1250	10.7	11.41	63.4	sp|P78346|RPP30_HUMAN	Ribonuclease P protein subunit p30 OS=Homo sapiens GN=RPP30 PE=1 SV=1	HUMAN	7	0.7607	1.0561	0.8428	0.8525
138	47.93	49.49	96.4	sp|P62937|PPIA_HUMAN	Peptidyl-prolyl cis-trans isomerase A OS=Homo sapiens GN=PPIA PE=1 SV=2	HUMAN	102	0.761	0.9706	0.8109	0.8525
1901	6.28	6.42	49.2	sp|P04183|KITH_HUMAN	Thymidine kinase, cytosolic OS=Homo sapiens GN=TK1 PE=1 SV=2	HUMAN	5	0.7613	0.8562	0.8149	0.8528
1620	8.01	8.07	35.1	sp|Q8TDX7|NEK7_HUMAN	Serine/threonine-protein kinase Nek7 OS=Homo sapiens GN=NEK7 PE=1 SV=1	HUMAN	5	0.7614	0.7976	0.8058	0.8528
4039	0.88	1.04	26.1	sp|Q9NVM9|ASUN_HUMAN	Protein asunder homolog OS=Homo sapiens GN=Asun PE=1 SV=2	HUMAN	1	0.7614	0.9135	0.7003	0.8529
2895	2.9	3.2	42.2	sp|P19878|NCF2_HUMAN	Neutrophil cytosol factor 2 OS=Homo sapiens GN=NCF2 PE=1 SV=2	HUMAN	2	0.7616	0.9304	0.745	0.8531
1696	7.6	7.84	29.2	sp|Q96FV9|THOC1_HUMAN	THO complex subunit 1 OS=Homo sapiens GN=THOC1 PE=1 SV=1	HUMAN	4	0.7619	1.0229	0.7266	0.8532
829	15.88	17.51	55.2	sp|Q9UNH7|SNX6_HUMAN	Sorting nexin-6 OS=Homo sapiens GN=SNX6 PE=1 SV=1	HUMAN	11	0.762	0.8958	0.7583	0.8533
2766	3.49	3.5	40.2	sp|Q9Y3A6|TMED5_HUMAN	Transmembrane emp24 domain-containing protein 5 OS=Homo sapiens GN=TMED5 PE=1 SV=1	HUMAN	2	0.7622	0.898	0.7147	0.8533
1041	13.07	13.89	55.1	sp|P53041|PPP5_HUMAN	Serine/threonine-protein phosphatase 5 OS=Homo sapiens GN=PPP5C PE=1 SV=1	HUMAN	13	0.7622	0.94	0.8383	0.8534
1934	6.15	6.74	28.6	sp|P00403|COX2_HUMAN	Cytochrome c oxidase subunit 2 OS=Homo sapiens GN=MT-CO2 PE=1 SV=1	HUMAN	10	0.7624	0.9423	0.7964	0.8541
1391	9.68	9.92	36.2	sp|O94992|HEXI1_HUMAN	Protein HEXIM1 OS=Homo sapiens GN=HEXIM1 PE=1 SV=1	HUMAN	5	0.7625	0.9365	0.6389	0.8542
239	36.68	37.87	77.8	sp|P46777|RL5_HUMAN	60S ribosomal protein L5 OS=Homo sapiens GN=RPL5 PE=1 SV=3	HUMAN	38	0.7626	0.9781	0.8021	0.8542
2951	2.66	4.5	51.2	sp|O75330|HMMR_HUMAN	Hyaluronan mediated motility receptor OS=Homo sapiens GN=HMMR PE=1 SV=2	HUMAN	2	0.7627	0.912	0.6588	0.8542
2350	4.42	4.81	17.4	sp|P42695|CNDD3_HUMAN	Condensin-2 complex subunit D3 OS=Homo sapiens GN=NCAPD3 PE=1 SV=2	HUMAN	3	0.7628	0.6733	0.9276	0.8543
1807	6.88	7.04	78.5	sp|P13693|TCTP_HUMAN	Translationally-controlled tumor protein OS=Homo sapiens GN=TPT1 PE=1 SV=1	HUMAN	10	0.7631	0.9046	0.7625	0.8545
1016	13.38	13.79	44.6	sp|Q9P015|RM15_HUMAN	39S ribosomal protein L15, mitochondrial OS=Homo sapiens GN=MRPL15 PE=1 SV=1	HUMAN	7	0.7631	0.9498	0.8194	0.8548
3127	2.18	2.7	42.4	sp|Q7Z4H8|KDEL2_HUMAN	KDEL motif-containing protein 2 OS=Homo sapiens GN=KDELC2 PE=1 SV=2	HUMAN	1	0.7633	0.9917	1.071	0.8549
1710	7.52	8.54	34.1	sp|Q13619|CUL4A_HUMAN	Cullin-4A OS=Homo sapiens GN=CUL4A PE=1 SV=3	HUMAN	4	0.7634	1.0819	0.6492	0.8552
335	28.62	28.87	73.7	sp|Q9Y3F4|STRAP_HUMAN	Serine-threonine kinase receptor-associated protein OS=Homo sapiens GN=STRAP PE=1 SV=1	HUMAN	26	0.7634	0.8951	0.791	0.8554
2060	6	6	49.1	sp|Q8N5W9|F101B_HUMAN	Protein FAM101B OS=Homo sapiens GN=FAM101B PE=1 SV=1	HUMAN	3	0.7635	0.8528	0.8183	0.8555
325	29.16	33.3	52.7	sp|P35606|COPB2_HUMAN	Coatomer subunit beta' OS=Homo sapiens GN=COPB2 PE=1 SV=2	HUMAN	27	0.7638	0.9586	0.8288	0.8556
3304	2.02	2.34	28.5	sp|O75570|RF1M_HUMAN	Peptide chain release factor 1, mitochondrial OS=Homo sapiens GN=MTRF1 PE=1 SV=2	HUMAN	1	0.7639	1.2776	0.5136	0.856
4198	0.47	0.48	11.9	sp|Q5T0B9|ZN362_HUMAN	Zinc finger protein 362 OS=Homo sapiens GN=ZNF362 PE=2 SV=1	HUMAN	1	0.7639	1.1559	0.5678	0.8561
2445	4.11	4.34	27.1	sp|Q01831|XPC_HUMAN	DNA repair protein complementing XP-C cells OS=Homo sapiens GN=XPC PE=1 SV=4	HUMAN	2	0.7639	0.8128	1.1075	0.8562
1437	9.25	10.64	50.7	sp|P20674|COX5A_HUMAN	Cytochrome c oxidase subunit 5A, mitochondrial OS=Homo sapiens GN=COX5A PE=1 SV=2	HUMAN	14	0.764	0.9163	0.7929	0.8565
1442	9.22	9.33	60.3	sp|P54105|ICLN_HUMAN	Methylosome subunit pICln OS=Homo sapiens GN=CLNS1A PE=1 SV=1	HUMAN	8	0.7641	1.0128	0.8656	0.8565
1968	6.07	6.2	30.3	sp|P15586|GNS_HUMAN	N-acetylglucosamine-6-sulfatase OS=Homo sapiens GN=GNS PE=1 SV=3	HUMAN	5	0.7642	0.887	0.7816	0.8567
2130	5.59	37.13	59.6	sp|O15523|DDX3Y_HUMAN	ATP-dependent RNA helicase DDX3Y OS=Homo sapiens GN=DDX3Y PE=1 SV=2	HUMAN	25	0.7642	0.7052	1.0404	0.8568
2580	4	4.69	28.1	sp|P16278|BGAL_HUMAN	Beta-galactosidase OS=Homo sapiens GN=GLB1 PE=1 SV=2	HUMAN	2	0.7643	0.7292	0.8668	0.8569
3334	2.02	2.05	38.1	sp|P40855|PEX19_HUMAN	Peroxisomal biogenesis factor 19 OS=Homo sapiens GN=PEX19 PE=1 SV=1	HUMAN	1	0.7646	0.9346	0.6989	0.8571
803	16.4	17.09	30.1	sp|P49750|YLPM1_HUMAN	YLP motif-containing protein 1 OS=Homo sapiens GN=YLPM1 PE=1 SV=3	HUMAN	12	0.7646	1.0182	0.7226	0.8573
610	19.8	20.85	53.6	sp|Q13043|STK4_HUMAN	Serine/threonine-protein kinase 4 OS=Homo sapiens GN=STK4 PE=1 SV=2	HUMAN	13	0.7647	0.8789	0.8316	0.8574
485	22.87	25.03	82.1	sp|P61224|RAP1B_HUMAN	Ras-related protein Rap-1b OS=Homo sapiens GN=RAP1B PE=1 SV=1	HUMAN	25	0.7648	0.9613	0.7757	0.8576
1117	12.16	13.25	47.6	sp|Q9BWS9|CHID1_HUMAN	Chitinase domain-containing protein 1 OS=Homo sapiens GN=CHID1 PE=1 SV=1	HUMAN	6	0.765	0.9207	0.8322	0.8583
1819	6.78	6.87	40.2	sp|P60903|S10AA_HUMAN	Protein S100-A10 OS=Homo sapiens GN=S100A10 PE=1 SV=2	HUMAN	4	0.7651	0.906	0.849	0.8584
1566	8.26	9.22	30.9	sp|Q969V3|NCLN_HUMAN	Nicalin OS=Homo sapiens GN=NCLN PE=1 SV=2	HUMAN	6	0.7654	0.8028	0.8944	0.8585
1044	13.03	14.64	44.7	sp|Q8N0X7|SPG20_HUMAN	Spartin OS=Homo sapiens GN=SPG20 PE=1 SV=1	HUMAN	8	0.7655	0.8506	0.7737	0.8585
1290	10.38	29.66	49.7	sp|Q15424|SAFB1_HUMAN	Scaffold attachment factor B1 OS=Homo sapiens GN=SAFB PE=1 SV=4	HUMAN	15	0.7656	0.9946	0.8677	0.8586
268	34.03	34.11	71.3	sp|Q9Y266|NUDC_HUMAN	Nuclear migration protein nudC OS=Homo sapiens GN=NUDC PE=1 SV=1	HUMAN	20	0.7657	0.9646	0.8433	0.8587
1773	7.05	7.18	24.4	sp|Q14671|PUM1_HUMAN	Pumilio homolog 1 OS=Homo sapiens GN=PUM1 PE=1 SV=3	HUMAN	5	0.7658	0.7637	0.8976	0.8587
567	20.74	21.45	83.3	sp|O75347|TBCA_HUMAN	Tubulin-specific chaperone A OS=Homo sapiens GN=TBCA PE=1 SV=3	HUMAN	11	0.7658	0.9424	0.8147	0.8589
1582	8.16	8.28	38.3	sp|O60711|LPXN_HUMAN	Leupaxin OS=Homo sapiens GN=LPXN PE=1 SV=1	HUMAN	7	0.7658	0.9826	0.9999	0.859
4264	0.35	0.37	31.4	sp|Q9Y399|RT02_HUMAN	28S ribosomal protein S2, mitochondrial OS=Homo sapiens GN=MRPS2 PE=1 SV=1	HUMAN	1	0.7659	0.619	0.9746	0.8592
3281	2.03	2.2	31.9	sp|Q9Y639|NPTN_HUMAN	Neuroplastin OS=Homo sapiens GN=NPTN PE=1 SV=2	HUMAN	1	0.766	0.8922	0.6447	0.8593
804	16.4	16.74	53.1	sp|Q9NYL9|TMOD3_HUMAN	Tropomodulin-3 OS=Homo sapiens GN=TMOD3 PE=1 SV=1	HUMAN	8	0.7661	1.0181	0.8214	0.8597
242	36.52	38.84	55.7	sp|P46060|RAGP1_HUMAN	Ran GTPase-activating protein 1 OS=Homo sapiens GN=RANGAP1 PE=1 SV=1	HUMAN	21	0.7662	0.8574	0.7826	0.8597
1565	8.27	8.4	52.3	sp|Q9BY77|PDIP3_HUMAN	Polymerase delta-interacting protein 3 OS=Homo sapiens GN=POLDIP3 PE=1 SV=2	HUMAN	6	0.7663	0.9599	0.8524	0.8598
1670	7.78	8.44	73.8	sp|Q14011|CIRBP_HUMAN	Cold-inducible RNA-binding protein OS=Homo sapiens GN=CIRBP PE=1 SV=1	HUMAN	6	0.7665	0.9803	0.8551	0.8599
1842	6.61	7.37	27.5	sp|Q8NCF5|NF2IP_HUMAN	NFATC2-interacting protein OS=Homo sapiens GN=NFATC2IP PE=1 SV=1	HUMAN	5	0.7666	0.8666	0.7897	0.8601
4604	0.11	0.15	35.9	sp|O95166|GBRAP_HUMAN	Gamma-aminobutyric acid receptor-associated protein OS=Homo sapiens GN=GABARAP PE=1 SV=1	HUMAN	0	0.7667	0.8271	0.8414	0.8601
1154	11.83	11.95	67.2	sp|O14737|PDCD5_HUMAN	Programmed cell death protein 5 OS=Homo sapiens GN=PDCD5 PE=1 SV=3	HUMAN	9	0.7667	0.9231	0.7934	0.8606
641	19.12	19.99	67.6	sp|P62277|RS13_HUMAN	40S ribosomal protein S13 OS=Homo sapiens GN=RPS13 PE=1 SV=2	HUMAN	11	0.7667	0.9817	0.7951	0.8607
2073	5.94	5.95	35.6	sp|Q96EK9|KTI12_HUMAN	Protein KTI12 homolog OS=Homo sapiens GN=KTI12 PE=1 SV=1	HUMAN	5	0.7668	0.9065	0.8298	0.8608
4151	0.57	0.58	45.6	sp|P50151|GBG10_HUMAN	Guanine nucleotide-binding protein G(I)/G(S)/G(O) subunit gamma-10 OS=Homo sapiens GN=GNG10 PE=1 SV=1	HUMAN	1	0.7671	0.8901	0.6955	0.8613
123	51.2	51.83	71.8	sp|P12268|IMDH2_HUMAN	Inosine-5'-monophosphate dehydrogenase 2 OS=Homo sapiens GN=IMPDH2 PE=1 SV=2	HUMAN	37	0.7671	0.925	0.8171	0.8613
2379	4.3	4.35	34.3	sp|O75251|NDUS7_HUMAN	NADH dehydrogenase [ubiquinone] iron-sulfur protein 7, mitochondrial OS=Homo sapiens GN=NDUFS7 PE=1 SV=3	HUMAN	4	0.7676	1.2086	0.818	0.8615
954	14.06	32.7	33.3	sp|Q8TAQ2|SMRC2_HUMAN	SWI/SNF complex subunit SMARCC2 OS=Homo sapiens GN=SMARCC2 PE=1 SV=1	HUMAN	21	0.7677	0.939	0.8464	0.8616
1613	8.02	8.6	48.6	sp|Q9Y5P6|GMPPB_HUMAN	Mannose-1-phosphate guanyltransferase beta OS=Homo sapiens GN=GMPPB PE=1 SV=2	HUMAN	4	0.7677	0.8785	1.0143	0.8618
4269	0.34	1.38	31.7	sp|Q12882|DPYD_HUMAN	Dihydropyrimidine dehydrogenase [NADP(+)] OS=Homo sapiens GN=DPYD PE=1 SV=2	HUMAN	1	0.7678	0.5538	1.0205	0.8618
1916	6.22	6.69	54.4	sp|O75663|TIPRL_HUMAN	TIP41-like protein OS=Homo sapiens GN=TIPRL PE=1 SV=2	HUMAN	4	0.7678	0.9369	0.719	0.862
1253	10.68	11.54	53.2	sp|Q14978|NOLC1_HUMAN	Nucleolar and coiled-body phosphoprotein 1 OS=Homo sapiens GN=NOLC1 PE=1 SV=2	HUMAN	9	0.7679	0.9897	0.6585	0.8621
1225	10.95	11.58	44.5	sp|Q8WVV9|HNRLL_HUMAN	Heterogeneous nuclear ribonucleoprotein L-like OS=Homo sapiens GN=HNRPLL PE=1 SV=1	HUMAN	6	0.768	0.9757	0.7019	0.8621
1584	8.15	8.3	46.3	sp|Q96A49|SYAP1_HUMAN	Synapse-associated protein 1 OS=Homo sapiens GN=SYAP1 PE=1 SV=1	HUMAN	4	0.7683	0.8364	0.7767	0.8622
4179	0.51	0.53	19.3	sp|O15027|SC16A_HUMAN	Protein transport protein Sec16A OS=Homo sapiens GN=SEC16A PE=1 SV=3	HUMAN	2	0.7683	1.0782	0.6466	0.8622
2092	5.83	6.15	47.3	sp|Q13951|PEBB_HUMAN	Core-binding factor subunit beta OS=Homo sapiens GN=CBFB PE=1 SV=2	HUMAN	3	0.7683	1.0551	0.8729	0.8622
4345	0.25	0.25	22.8	sp|Q9P2X0|DPM3_HUMAN	Dolichol-phosphate mannosyltransferase subunit 3 OS=Homo sapiens GN=DPM3 PE=1 SV=2	HUMAN	0	0.7684	1.1556	0.5712	0.8624
1381	9.78	10.78	55.8	sp|Q9UNP9|PPIE_HUMAN	Peptidyl-prolyl cis-trans isomerase E OS=Homo sapiens GN=PPIE PE=1 SV=1	HUMAN	7	0.7685	1.0892	0.7473	0.8627
1313	10.18	10.3	68.3	sp|Q14019|COTL1_HUMAN	Coactosin-like protein OS=Homo sapiens GN=COTL1 PE=1 SV=3	HUMAN	6	0.7685	0.9271	0.8839	0.8627
867	15.24	15.48	48.1	sp|Q5TBB1|RNH2B_HUMAN	Ribonuclease H2 subunit B OS=Homo sapiens GN=RNASEH2B PE=1 SV=1	HUMAN	12	0.7686	0.9779	0.7745	0.8629
4058	0.82	0.82	32.4	sp|P62877|RBX1_HUMAN	E3 ubiquitin-protein ligase RBX1 OS=Homo sapiens GN=RBX1 PE=1 SV=1	HUMAN	1	0.7688	0.8853	0.7193	0.863
940	14.22	14.99	52.7	sp|Q9UN86|G3BP2_HUMAN	Ras GTPase-activating protein-binding protein 2 OS=Homo sapiens GN=G3BP2 PE=1 SV=2	HUMAN	9	0.7688	0.8615	0.8078	0.863
430	24.83	25.16	59.8	sp|Q06323|PSME1_HUMAN	Proteasome activator complex subunit 1 OS=Homo sapiens GN=PSME1 PE=1 SV=1	HUMAN	17	0.7689	0.9845	0.8036	0.8633
1212	11.13	11.22	44.5	sp|P23588|IF4B_HUMAN	Eukaryotic translation initiation factor 4B OS=Homo sapiens GN=EIF4B PE=1 SV=2	HUMAN	8	0.769	0.9461	0.7911	0.8635
4139	0.6	0.67	16.6	sp|Q9Y2H6|FND3A_HUMAN	Fibronectin type-III domain-containing protein 3A OS=Homo sapiens GN=FNDC3A PE=1 SV=4	HUMAN	1	0.7691	1.1004	1.6441	0.8637
1788	6.94	7.44	30.7	sp|O75794|CD123_HUMAN	Cell division cycle protein 123 homolog OS=Homo sapiens GN=CDC123 PE=1 SV=1	HUMAN	4	0.7693	0.8064	0.5058	0.8637
2968	2.59	2.67	23	sp|P34059|GALNS_HUMAN	N-acetylgalactosamine-6-sulfatase OS=Homo sapiens GN=GALNS PE=1 SV=1	HUMAN	2	0.7694	0.9104	0.7391	0.8637
2877	3.01	3.06	27.3	sp|Q9NX46|ARHL2_HUMAN	Poly(ADP-ribose) glycohydrolase ARH3 OS=Homo sapiens GN=ADPRHL2 PE=1 SV=1	HUMAN	2	0.7695	0.809	1.128	0.8637
202	40.03	40.35	51.9	sp|P46013|KI67_HUMAN	Antigen KI-67 OS=Homo sapiens GN=MKI67 PE=1 SV=2	HUMAN	29	0.7696	0.8575	0.7689	0.8637
2739	3.6	45.55	86.4	sp|P16402|H13_HUMAN	Histone H1.3 OS=Homo sapiens GN=HIST1H1D PE=1 SV=2	HUMAN	33	0.7696	1.0017	0.8734	0.8639
3892	1.42	1.54	38.5	sp|Q13496|MTM1_HUMAN	Myotubularin OS=Homo sapiens GN=MTM1 PE=1 SV=2	HUMAN	1	0.7697	0.7641	0.8715	0.8642
303	31.02	32.36	49.8	sp|Q9BXP5|SRRT_HUMAN	Serrate RNA effector molecule homolog OS=Homo sapiens GN=SRRT PE=1 SV=1	HUMAN	24	0.7698	0.9345	0.7994	0.8642
3010	2.47	2.56	48.6	sp|Q9Y3X0|CCDC9_HUMAN	Coiled-coil domain-containing protein 9 OS=Homo sapiens GN=CCDC9 PE=1 SV=1	HUMAN	1	0.7698	1.1839	0.7718	0.8642
767	16.93	19.53	40	sp|O95239|KIF4A_HUMAN	Chromosome-associated kinesin KIF4A OS=Homo sapiens GN=KIF4A PE=1 SV=3	HUMAN	10	0.7704	0.8886	0.8944	0.8645
2977	2.56	3.33	28.8	sp|Q9Y4J8|DTNA_HUMAN	Dystrobrevin alpha OS=Homo sapiens GN=DTNA PE=1 SV=2	HUMAN	2	0.7706	1.0672	0.7244	0.8646
1641	8	8	25.6	sp|P40306|PSB10_HUMAN	Proteasome subunit beta type-10 OS=Homo sapiens GN=PSMB10 PE=1 SV=1	HUMAN	4	0.7707	1.0702	0.8155	0.8648
2903	2.87	2.94	22	sp|Q8N4Q0|ZADH2_HUMAN	Zinc-binding alcohol dehydrogenase domain-containing protein 2 OS=Homo sapiens GN=ZADH2 PE=1 SV=1	HUMAN	3	0.7708	1.0854	0.7294	0.8648
2633	4	4.03	32.2	sp|Q9HC21|TPC_HUMAN	Mitochondrial thiamine pyrophosphate carrier OS=Homo sapiens GN=SLC25A19 PE=1 SV=1	HUMAN	2	0.7708	1.0166	0.8031	0.865
3514	2	2.34	27.5	sp|Q9P253|VPS18_HUMAN	Vacuolar protein sorting-associated protein 18 homolog OS=Homo sapiens GN=VPS18 PE=1 SV=2	HUMAN	2	0.771	0.8492	0.7297	0.865
4183	0.49	2.71	29.1	sp|Q8NCA5|FA98A_HUMAN	Protein FAM98A OS=Homo sapiens GN=FAM98A PE=1 SV=1	HUMAN	5	0.7711	0.9307	0.924	0.8651
487	22.83	22.96	67.5	sp|P08621|RU17_HUMAN	U1 small nuclear ribonucleoprotein 70 kDa OS=Homo sapiens GN=SNRNP70 PE=1 SV=2	HUMAN	14	0.7712	0.9602	0.9113	0.8651
3597	2	2.1	53.2	sp|P61024|CKS1_HUMAN	Cyclin-dependent kinases regulatory subunit 1 OS=Homo sapiens GN=CKS1B PE=1 SV=1	HUMAN	1	0.7713	1.0367	0.8896	0.8652
2180	5.32	5.44	30	sp|Q15796|SMAD2_HUMAN	Mothers against decapentaplegic homolog 2 OS=Homo sapiens GN=SMAD2 PE=1 SV=1	HUMAN	3	0.7713	0.811	1.1904	0.8652
2307	4.67	7.37	47.6	sp|Q8IWJ2|GCC2_HUMAN	GRIP and coiled-coil domain-containing protein 2 OS=Homo sapiens GN=GCC2 PE=1 SV=4	HUMAN	6	0.7715	0.8826	0.7965	0.8653
620	19.67	20.94	48.5	sp|Q32MZ4|LRRF1_HUMAN	Leucine-rich repeat flightless-interacting protein 1 OS=Homo sapiens GN=LRRFIP1 PE=1 SV=2	HUMAN	17	0.7715	0.8534	0.842	0.8655
1050	12.96	15.4	33.6	sp|Q9UKF6|CPSF3_HUMAN	Cleavage and polyadenylation specificity factor subunit 3 OS=Homo sapiens GN=CPSF3 PE=1 SV=1	HUMAN	8	0.7717	1.0183	0.9307	0.8657
583	20.4	20.87	71	sp|P62906|RL10A_HUMAN	60S ribosomal protein L10a OS=Homo sapiens GN=RPL10A PE=1 SV=2	HUMAN	15	0.7718	0.9247	0.8171	0.8657
146	46.73	46.75	96.1	sp|P62258|1433E_HUMAN	14-3-3 protein epsilon OS=Homo sapiens GN=YWHAE PE=1 SV=1	HUMAN	56	0.7721	0.9763	0.8228	0.8657
759	17.14	17.91	70.9	sp|P62280|RS11_HUMAN	40S ribosomal protein S11 OS=Homo sapiens GN=RPS11 PE=1 SV=3	HUMAN	10	0.7725	1.0079	0.8644	0.866
2044	6	6.1	33.7	sp|Q96B26|EXOS8_HUMAN	Exosome complex component RRP43 OS=Homo sapiens GN=EXOSC8 PE=1 SV=1	HUMAN	3	0.7727	1.0522	0.6519	0.866
3220	2.06	2.32	22.9	sp|Q15102|PA1B3_HUMAN	Platelet-activating factor acetylhydrolase IB subunit gamma OS=Homo sapiens GN=PAFAH1B3 PE=1 SV=1	HUMAN	1	0.7727	0.6275	1.3568	0.8662
140	47.41	49.54	51.5	sp|Q86UP2|KTN1_HUMAN	Kinectin OS=Homo sapiens GN=KTN1 PE=1 SV=1	HUMAN	26	0.7728	0.9549	0.794	0.8666
1882	6.38	6.46	57.9	sp|Q9Y3D6|FIS1_HUMAN	Mitochondrial fission 1 protein OS=Homo sapiens GN=FIS1 PE=1 SV=2	HUMAN	4	0.7729	1.0526	0.7807	0.8667
3720	2	2.01	17	sp|Q49AR2|CE022_HUMAN	UPF0489 protein C5orf22 OS=Homo sapiens GN=C5orf22 PE=1 SV=2	HUMAN	1	0.7729	0.348	3.6715	0.8668
1285	10.42	11.62	22.3	sp|P35658|NU214_HUMAN	Nuclear pore complex protein Nup214 OS=Homo sapiens GN=NUP214 PE=1 SV=2	HUMAN	9	0.7732	0.9805	0.83	0.8668
1278	10.49	11.23	42.8	sp|Q9GZR7|DDX24_HUMAN	ATP-dependent RNA helicase DDX24 OS=Homo sapiens GN=DDX24 PE=1 SV=1	HUMAN	6	0.7733	1.1628	0.6848	0.8671
2932	2.75	3.05	22.3	sp|Q13042|CDC16_HUMAN	Cell division cycle protein 16 homolog OS=Homo sapiens GN=CDC16 PE=1 SV=2	HUMAN	2	0.7734	1.5038	0.456	0.8676
274	33.57	33.88	83.4	sp|P37802|TAGL2_HUMAN	Transgelin-2 OS=Homo sapiens GN=TAGLN2 PE=1 SV=3	HUMAN	37	0.7735	0.8709	0.8336	0.868
3198	2.08	2.34	25.9	sp|Q13740|CD166_HUMAN	CD166 antigen OS=Homo sapiens GN=ALCAM PE=1 SV=2	HUMAN	1	0.7738	0.9279	0.8015	0.8681
586	20.33	21.38	44.5	sp|Q15003|CND2_HUMAN	Condensin complex subunit 2 OS=Homo sapiens GN=NCAPH PE=1 SV=3	HUMAN	13	0.7738	0.8268	0.9007	0.8681
498	22.42	23.36	60.5	sp|P61011|SRP54_HUMAN	Signal recognition particle 54 kDa protein OS=Homo sapiens GN=SRP54 PE=1 SV=1	HUMAN	15	0.774	0.9815	0.8231	0.8683
747	17.26	22.11	51.2	sp|P61289|PSME3_HUMAN	Proteasome activator complex subunit 3 OS=Homo sapiens GN=PSME3 PE=1 SV=1	HUMAN	12	0.7742	0.9244	0.7413	0.8683
528	21.61	25.56	76	sp|Q13242|SRSF9_HUMAN	Serine/arginine-rich splicing factor 9 OS=Homo sapiens GN=SRSF9 PE=1 SV=1	HUMAN	19	0.7742	0.9586	0.8395	0.8685
698	18.08	19.2	41.1	sp|P08631|HCK_HUMAN	Tyrosine-protein kinase HCK OS=Homo sapiens GN=HCK PE=1 SV=5	HUMAN	16	0.7743	0.9072	0.7854	0.8688
3146	2.16	2.17	38	sp|Q9NZ45|CISD1_HUMAN	CDGSH iron-sulfur domain-containing protein 1 OS=Homo sapiens GN=CISD1 PE=1 SV=1	HUMAN	3	0.7743	0.8832	0.8824	0.8688
2295	4.73	5.16	34.8	sp|Q9UHL4|DPP2_HUMAN	Dipeptidyl peptidase 2 OS=Homo sapiens GN=DPP7 PE=1 SV=3	HUMAN	4	0.7745	0.9732	1.0048	0.8688
666	18.58	18.89	62.5	sp|Q8IY67|RAVR1_HUMAN	Ribonucleoprotein PTB-binding 1 OS=Homo sapiens GN=RAVER1 PE=1 SV=1	HUMAN	23	0.7746	0.9287	0.7394	0.869
2246	4.97	5.04	64.5	sp|Q9NY12|GAR1_HUMAN	H/ACA ribonucleoprotein complex subunit 1 OS=Homo sapiens GN=GAR1 PE=1 SV=1	HUMAN	3	0.7747	1.0269	0.7969	0.8691
837	15.68	16.12	62.2	sp|Q96AG4|LRC59_HUMAN	Leucine-rich repeat-containing protein 59 OS=Homo sapiens GN=LRRC59 PE=1 SV=1	HUMAN	13	0.7747	0.9526	0.879	0.8693
438	24.52	25.46	70.7	sp|P15880|RS2_HUMAN	40S ribosomal protein S2 OS=Homo sapiens GN=RPS2 PE=1 SV=2	HUMAN	30	0.7748	0.9549	0.7679	0.8694
1433	9.28	9.29	51.9	sp|P25325|THTM_HUMAN	3-mercaptopyruvate sulfurtransferase OS=Homo sapiens GN=MPST PE=1 SV=3	HUMAN	9	0.775	0.9487	0.7728	0.8695
2406	4.2	4.22	50.5	sp|C9JLW8|F195B_HUMAN	Protein FAM195B OS=Homo sapiens GN=FAM195B PE=3 SV=1	HUMAN	3	0.7751	1.0308	0.6564	0.8697
4752	0.07	0.48	32.1	sp|Q9UGN5|PARP2_HUMAN	Poly [ADP-ribose] polymerase 2 OS=Homo sapiens GN=PARP2 PE=1 SV=2	HUMAN	0	0.7751	1.0659	0.7378	0.8698
4873	0.06	0.09	34.8	sp|Q56NI9|ESCO2_HUMAN	N-acetyltransferase ESCO2 OS=Homo sapiens GN=ESCO2 PE=1 SV=1	HUMAN	0	0.7752	0.9552	0.6963	0.8708
595	20.18	20.46	77.2	sp|P20290|BTF3_HUMAN	Transcription factor BTF3 OS=Homo sapiens GN=BTF3 PE=1 SV=1	HUMAN	26	0.7752	0.8476	0.8146	0.8708
671	18.52	19.47	64.3	sp|Q9HCU5|PREB_HUMAN	Prolactin regulatory element-binding protein OS=Homo sapiens GN=PREB PE=1 SV=2	HUMAN	14	0.7753	0.9986	0.891	0.871
1803	6.89	8.94	54.9	sp|Q8WW22|DNJA4_HUMAN	DnaJ homolog subfamily A member 4 OS=Homo sapiens GN=DNAJA4 PE=1 SV=1	HUMAN	5	0.7756	1.0427	0.8129	0.8714
2390	4.25	33.53	92.1	sp|P06899|H2B1J_HUMAN	Histone H2B type 1-J OS=Homo sapiens GN=HIST1H2BJ PE=1 SV=3	HUMAN	85	0.7759	1.0373	0.837	0.8718
797	16.51	16.57	69.5	sp|P60660|MYL6_HUMAN	Myosin light polypeptide 6 OS=Homo sapiens GN=MYL6 PE=1 SV=2	HUMAN	24	0.776	0.8985	0.8195	0.8722
3716	2	2.01	30.3	sp|Q9UNL2|SSRG_HUMAN	Translocon-associated protein subunit gamma OS=Homo sapiens GN=SSR3 PE=1 SV=1	HUMAN	1	0.776	0.8352	0.892	0.8726
2323	4.57	5.26	43.7	sp|P42126|ECI1_HUMAN	Enoyl-CoA delta isomerase 1, mitochondrial OS=Homo sapiens GN=ECI1 PE=1 SV=1	HUMAN	4	0.7764	0.902	0.9166	0.8727
3972	1.09	1.09	34.9	sp|Q9BWH2|FUND2_HUMAN	FUN14 domain-containing protein 2 OS=Homo sapiens GN=FUNDC2 PE=1 SV=2	HUMAN	1	0.7765	1.0682	0.7646	0.8727
2263	4.86	5.86	33.1	sp|Q5JVF3|PCID2_HUMAN	PCI domain-containing protein 2 OS=Homo sapiens GN=PCID2 PE=1 SV=2	HUMAN	3	0.7766	0.7281	0.865	0.8728
2653	4	4	43	sp|O95139|NDUB6_HUMAN	NADH dehydrogenase [ubiquinone] 1 beta subcomplex subunit 6 OS=Homo sapiens GN=NDUFB6 PE=1 SV=3	HUMAN	3	0.7767	1.0559	0.7683	0.8728
4098	0.7	0.85	27.8	sp|Q96IR7|HPDL_HUMAN	4-hydroxyphenylpyruvate dioxygenase-like protein OS=Homo sapiens GN=HPDL PE=1 SV=1	HUMAN	1	0.7767	1.179	0.7429	0.8736
714	17.81	18.37	67.5	sp|O75821|EIF3G_HUMAN	Eukaryotic translation initiation factor 3 subunit G OS=Homo sapiens GN=EIF3G PE=1 SV=2	HUMAN	11	0.7768	0.9464	0.8419	0.8737
1787	6.95	7.01	43	sp|Q9NR56|MBNL1_HUMAN	Muscleblind-like protein 1 OS=Homo sapiens GN=MBNL1 PE=1 SV=2	HUMAN	9	0.777	0.9672	0.8277	0.8738
1073	12.66	12.94	56.4	sp|P30520|PURA2_HUMAN	Adenylosuccinate synthetase isozyme 2 OS=Homo sapiens GN=ADSS PE=1 SV=3	HUMAN	10	0.7772	0.8593	0.8542	0.8739
3757	2	2	22.6	sp|Q9NRR3|C42S2_HUMAN	CDC42 small effector protein 2 OS=Homo sapiens GN=CDC42SE2 PE=1 SV=1	HUMAN	1	0.7772	0.9178	0.9985	0.8739
2718	3.68	3.78	32.8	sp|P01137|TGFB1_HUMAN	Transforming growth factor beta-1 OS=Homo sapiens GN=TGFB1 PE=1 SV=2	HUMAN	2	0.7772	1.0591	0.9752	0.8739
58	72.28	72.71	77	sp|P27797|CALR_HUMAN	Calreticulin OS=Homo sapiens GN=CALR PE=1 SV=1	HUMAN	101	0.7773	0.9598	0.8191	0.874
3141	2.17	2.17	30.8	sp|P63272|SPT4H_HUMAN	Transcription elongation factor SPT4 OS=Homo sapiens GN=SUPT4H1 PE=1 SV=1	HUMAN	2	0.7773	0.9271	0.9852	0.874
1054	12.91	13.45	41.7	sp|Q92896|GSLG1_HUMAN	Golgi apparatus protein 1 OS=Homo sapiens GN=GLG1 PE=1 SV=2	HUMAN	6	0.7775	0.8356	0.8206	0.8742
643	19.08	19.65	65.5	sp|P26368|U2AF2_HUMAN	Splicing factor U2AF 65 kDa subunit OS=Homo sapiens GN=U2AF2 PE=1 SV=4	HUMAN	18	0.7776	0.9508	0.7821	0.8743
233	37.5	45.47	94.3	sp|P63104|1433Z_HUMAN	14-3-3 protein zeta/delta OS=Homo sapiens GN=YWHAZ PE=1 SV=1	HUMAN	48	0.7776	0.9412	0.8204	0.8745
2467	4.07	4.32	32.7	sp|P10619|PPGB_HUMAN	Lysosomal protective protein OS=Homo sapiens GN=CTSA PE=1 SV=2	HUMAN	4	0.7777	1.0584	0.5836	0.8747
600	20	20.15	48	sp|P18754|RCC1_HUMAN	Regulator of chromosome condensation OS=Homo sapiens GN=RCC1 PE=1 SV=1	HUMAN	18	0.7779	1.0012	0.8198	0.8749
1395	9.64	10.04	63.7	sp|P21291|CSRP1_HUMAN	Cysteine and glycine-rich protein 1 OS=Homo sapiens GN=CSRP1 PE=1 SV=3	HUMAN	5	0.778	0.9633	0.8493	0.875
427	24.93	25.87	66.7	sp|P30040|ERP29_HUMAN	Endoplasmic reticulum resident protein 29 OS=Homo sapiens GN=ERP29 PE=1 SV=4	HUMAN	17	0.7783	0.9241	0.8064	0.8751
4025	0.91	1	14	sp|Q9Y2I8|WDR37_HUMAN	WD repeat-containing protein 37 OS=Homo sapiens GN=WDR37 PE=2 SV=2	HUMAN	1	0.7783	1.1064	0.8742	0.8752
990	13.62	14.93	44.1	sp|P25098|ARBK1_HUMAN	Beta-adrenergic receptor kinase 1 OS=Homo sapiens GN=ADRBK1 PE=1 SV=2	HUMAN	9	0.7784	1.0558	0.7354	0.8752
2119	5.66	5.81	42.6	sp|P08243|ASNS_HUMAN	Asparagine synthetase [glutamine-hydrolyzing] OS=Homo sapiens GN=ASNS PE=1 SV=4	HUMAN	5	0.7785	0.7305	0.8851	0.8755
2908	2.86	2.91	49.2	sp|P25774|CATS_HUMAN	Cathepsin S OS=Homo sapiens GN=CTSS PE=1 SV=3	HUMAN	3	0.7786	0.9342	0.7485	0.8757
2921	2.81	2.88	26.7	sp|Q9Y4P1|ATG4B_HUMAN	Cysteine protease ATG4B OS=Homo sapiens GN=ATG4B PE=1 SV=2	HUMAN	2	0.7787	0.829	1.0264	0.8757
488	22.82	23.97	50.9	sp|Q8NBS9|TXND5_HUMAN	Thioredoxin domain-containing protein 5 OS=Homo sapiens GN=TXNDC5 PE=1 SV=2	HUMAN	15	0.7789	0.9498	0.7887	0.8758
3999	1	1.09	30.2	sp|Q6UW68|TM205_HUMAN	Transmembrane protein 205 OS=Homo sapiens GN=TMEM205 PE=1 SV=1	HUMAN	1	0.779	0.903	0.7412	0.8759
79	63.67	65.17	64.7	sp|P13667|PDIA4_HUMAN	Protein disulfide-isomerase A4 OS=Homo sapiens GN=PDIA4 PE=1 SV=2	HUMAN	45	0.779	0.9535	0.838	0.8759
4178	0.51	0.54	37.6	sp|Q05D32|CTSL2_HUMAN	CTD small phosphatase-like protein 2 OS=Homo sapiens GN=CTDSPL2 PE=1 SV=2	HUMAN	1	0.7791	0.8078	0.5792	0.876
2751	3.54	8.61	29.1	sp|P23497|SP100_HUMAN	Nuclear autoantigen Sp-100 OS=Homo sapiens GN=SP100 PE=1 SV=3	HUMAN	8	0.7791	0.7435	1.1088	0.8765
2012	6.02	6.25	44.3	sp|Q92890|UFD1_HUMAN	Ubiquitin fusion degradation protein 1 homolog OS=Homo sapiens GN=UFD1L PE=1 SV=3	HUMAN	8	0.7792	0.8854	0.7696	0.8765
2458	4.08	10.48	53	sp|P49590|SYHM_HUMAN	Probable histidine--tRNA ligase, mitochondrial OS=Homo sapiens GN=HARS2 PE=1 SV=1	HUMAN	6	0.7794	1.6389	0.5206	0.8767
2332	4.52	4.55	25.9	sp|P34910|EVI2B_HUMAN	Protein EVI2B OS=Homo sapiens GN=EVI2B PE=1 SV=2	HUMAN	4	0.7796	0.6773	0.8182	0.8768
417	25.38	26.39	64.9	sp|Q12905|ILF2_HUMAN	Interleukin enhancer-binding factor 2 OS=Homo sapiens GN=ILF2 PE=1 SV=2	HUMAN	22	0.7797	0.9468	0.8011	0.8769
338	28.39	29.17	40.4	sp|P20701|ITAL_HUMAN	Integrin alpha-L OS=Homo sapiens GN=ITGAL PE=1 SV=3	HUMAN	26	0.7797	1.0178	0.8031	0.8769
269	33.93	34.24	70.2	sp|Q9H0U4|RAB1B_HUMAN	Ras-related protein Rab-1B OS=Homo sapiens GN=RAB1B PE=1 SV=1	HUMAN	29	0.7798	0.9626	0.8501	0.8769
1327	10.1	10.6	26.9	sp|Q96S59|RANB9_HUMAN	Ran-binding protein 9 OS=Homo sapiens GN=RANBP9 PE=1 SV=1	HUMAN	7	0.78	0.8912	0.7539	0.8772
2948	2.68	3.81	21.4	sp|Q9BZK7|TBL1R_HUMAN	F-box-like/WD repeat-containing protein TBL1XR1 OS=Homo sapiens GN=TBL1XR1 PE=1 SV=1	HUMAN	3	0.7801	1.0337	0.7127	0.8773
4023	0.92	0.93	48	sp|Q9NRX2|RM17_HUMAN	39S ribosomal protein L17, mitochondrial OS=Homo sapiens GN=MRPL17 PE=1 SV=1	HUMAN	2	0.7802	1.2536	0.6525	0.8774
31	88.58	89.75	74.6	sp|Q92598|HS105_HUMAN	Heat shock protein 105 kDa OS=Homo sapiens GN=HSPH1 PE=1 SV=1	HUMAN	68	0.7805	0.8878	0.7944	0.8775
2348	4.45	4.47	45.4	sp|Q9BRX5|PSF3_HUMAN	DNA replication complex GINS protein PSF3 OS=Homo sapiens GN=GINS3 PE=1 SV=1	HUMAN	3	0.7809	0.8588	0.8283	0.8778
359	27.4	47.19	59.4	sp|P11388|TOP2A_HUMAN	DNA topoisomerase 2-alpha OS=Homo sapiens GN=TOP2A PE=1 SV=3	HUMAN	31	0.781	0.8957	0.7812	0.8779
260	35.05	35.27	73.2	sp|P05388|RLA0_HUMAN	60S acidic ribosomal protein P0 OS=Homo sapiens GN=RPLP0 PE=1 SV=1	HUMAN	32	0.781	0.966	0.8046	0.8783
1319	10.14	10.68	33.3	sp|Q9H2P0|ADNP_HUMAN	Activity-dependent neuroprotector homeobox protein OS=Homo sapiens GN=ADNP PE=1 SV=1	HUMAN	6	0.781	1.1245	0.7037	0.8783
2655	4	4	23.1	sp|P23434|GCSH_HUMAN	Glycine cleavage system H protein, mitochondrial OS=Homo sapiens GN=GCSH PE=1 SV=2	HUMAN	2	0.7812	0.9734	0.7654	0.8786
3186	2.09	7.14	35.1	sp|Q6UB35|C1TM_HUMAN	Monofunctional C1-tetrahydrofolate synthase, mitochondrial OS=Homo sapiens GN=MTHFD1L PE=1 SV=1	HUMAN	4	0.7812	0.8646	1.1428	0.8786
128	50.27	54.56	53.5	sp|O60610|DIAP1_HUMAN	Protein diaphanous homolog 1 OS=Homo sapiens GN=DIAPH1 PE=1 SV=2	HUMAN	39	0.7814	0.9708	0.7771	0.8789
1086	12.5	12.54	50.2	sp|Q9GZS3|WDR61_HUMAN	WD repeat-containing protein 61 OS=Homo sapiens GN=WDR61 PE=1 SV=1	HUMAN	13	0.7814	0.9966	0.8042	0.8791
340	28.32	28.42	43.2	sp|P14314|GLU2B_HUMAN	Glucosidase 2 subunit beta OS=Homo sapiens GN=PRKCSH PE=1 SV=2	HUMAN	20	0.7816	0.9404	0.7954	0.8793
2051	6	6.06	61	sp|Q9Y244|POMP_HUMAN	Proteasome maturation protein OS=Homo sapiens GN=POMP PE=1 SV=1	HUMAN	4	0.7822	0.772	0.6128	0.8796
4359	0.24	0.26	44.5	sp|O95298|NDUC2_HUMAN	NADH dehydrogenase [ubiquinone] 1 subunit C2 OS=Homo sapiens GN=NDUFC2 PE=1 SV=1	HUMAN	0	0.7822	0.8574	0.9617	0.8799
3636	2	2.05	30.7	sp|O14893|GEMI2_HUMAN	Gem-associated protein 2 OS=Homo sapiens GN=GEMIN2 PE=1 SV=1	HUMAN	1	0.7823	0.9298	0.8088	0.88
314	29.91	30.31	72.9	sp|P07954|FUMH_HUMAN	Fumarate hydratase, mitochondrial OS=Homo sapiens GN=FH PE=1 SV=3	HUMAN	34	0.7823	0.9447	0.8147	0.8802
3819	1.7	1.87	15.9	sp|Q6P4R8|NFRKB_HUMAN	Nuclear factor related to kappa-B-binding protein OS=Homo sapiens GN=NFRKB PE=1 SV=2	HUMAN	2	0.7828	0.8467	0.7677	0.8802
828	15.9	18.2	52.3	sp|Q96T51|RUFY1_HUMAN	RUN and FYVE domain-containing protein 1 OS=Homo sapiens GN=RUFY1 PE=1 SV=2	HUMAN	9	0.7828	0.8667	0.8414	0.8805
1462	9.01	38.64	53.9	sp|P16104|H2AX_HUMAN	Histone H2A.x OS=Homo sapiens GN=H2AFX PE=1 SV=2	HUMAN	60	0.7829	0.955	0.8384	0.8805
744	17.31	18.87	54.6	sp|O43491|E41L2_HUMAN	Band 4.1-like protein 2 OS=Homo sapiens GN=EPB41L2 PE=1 SV=1	HUMAN	13	0.7833	0.8753	0.8159	0.8806
1559	8.31	8.43	67.2	sp|Q99426|TBCB_HUMAN	Tubulin-folding cofactor B OS=Homo sapiens GN=TBCB PE=1 SV=2	HUMAN	7	0.7833	0.8811	0.9812	0.8806
3022	2.43	2.69	34.9	sp|Q66K14|TBC9B_HUMAN	TBC1 domain family member 9B OS=Homo sapiens GN=TBC1D9B PE=1 SV=3	HUMAN	1	0.7834	0.8452	0.9151	0.8807
2064	5.99	6.09	57.1	sp|Q86U28|ISCA2_HUMAN	Iron-sulfur cluster assembly 2 homolog, mitochondrial OS=Homo sapiens GN=ISCA2 PE=1 SV=2	HUMAN	4	0.7836	0.9128	0.7465	0.8808
319	29.64	31.02	45.7	sp|P55786|PSA_HUMAN	Puromycin-sensitive aminopeptidase OS=Homo sapiens GN=NPEPPS PE=1 SV=2	HUMAN	20	0.7836	0.9299	0.8731	0.8811
2027	6.01	6.06	25.1	sp|Q9UBR2|CATZ_HUMAN	Cathepsin Z OS=Homo sapiens GN=CTSZ PE=1 SV=1	HUMAN	3	0.7837	1.1745	0.8023	0.8811
1571	8.23	8.32	53.9	sp|P13073|COX41_HUMAN	Cytochrome c oxidase subunit 4 isoform 1, mitochondrial OS=Homo sapiens GN=COX4I1 PE=1 SV=1	HUMAN	6	0.7839	1.0167	0.8103	0.8813
375	26.88	26.89	77.6	sp|P09211|GSTP1_HUMAN	Glutathione S-transferase P OS=Homo sapiens GN=GSTP1 PE=1 SV=2	HUMAN	54	0.784	0.9388	0.801	0.8814
61	69.61	72.9	92.8	sp|P48643|TCPE_HUMAN	T-complex protein 1 subunit epsilon OS=Homo sapiens GN=CCT5 PE=1 SV=1	HUMAN	68	0.7841	0.9798	0.8236	0.8815
14	121.71	123.3	72.4	sp|P19338|NUCL_HUMAN	Nucleolin OS=Homo sapiens GN=NCL PE=1 SV=3	HUMAN	102	0.7841	0.9823	0.8505	0.8815
1204	11.24	11.25	66.7	sp|P99999|CYC_HUMAN	Cytochrome c OS=Homo sapiens GN=CYCS PE=1 SV=2	HUMAN	7	0.7842	0.9925	0.8311	0.8815
1719	7.45	7.84	32.1	sp|Q13574|DGKZ_HUMAN	Diacylglycerol kinase zeta OS=Homo sapiens GN=DGKZ PE=1 SV=3	HUMAN	6	0.7843	0.9554	0.7147	0.8815
2516	4.02	4.35	20.6	sp|Q86W50|MET16_HUMAN	Methyltransferase-like protein 16 OS=Homo sapiens GN=METTL16 PE=1 SV=2	HUMAN	2	0.7845	1.0066	0.9413	0.8817
2206	5.18	6.63	29.3	sp|Q13315|ATM_HUMAN	Serine-protein kinase ATM OS=Homo sapiens GN=ATM PE=1 SV=3	HUMAN	6	0.7846	0.9237	0.8155	0.8819
1930	6.16	6.48	40.7	sp|Q49A26|GLYR1_HUMAN	Putative oxidoreductase GLYR1 OS=Homo sapiens GN=GLYR1 PE=1 SV=3	HUMAN	5	0.7846	1.0578	0.8363	0.8819
346	28.03	28.41	94.7	sp|Q99497|PARK7_HUMAN	Protein DJ-1 OS=Homo sapiens GN=PARK7 PE=1 SV=2	HUMAN	18	0.7847	0.9845	0.7992	0.8822
1105	12.3	13.41	43.3	sp|Q9UBV2|SE1L1_HUMAN	Protein sel-1 homolog 1 OS=Homo sapiens GN=SEL1L PE=1 SV=3	HUMAN	8	0.7847	0.9991	0.782	0.8822
2438	4.12	4.5	25	sp|Q96JI7|SPTCS_HUMAN	Spatacsin OS=Homo sapiens GN=SPG11 PE=1 SV=3	HUMAN	3	0.7847	0.7919	1.0547	0.8824
4204	0.45	2.66	26.4	sp|Q9ULC5|ACSL5_HUMAN	Long-chain-fatty-acid--CoA ligase 5 OS=Homo sapiens GN=ACSL5 PE=1 SV=1	HUMAN	2	0.7847	1.1621	0.7584	0.8825
4838	0.06	0.29	28.3	RRRRRsp|Q15051|IQCB1_HUMAN	REVERSED IQ calmodulin-binding motif-containing protein 1 OS=Homo sapiens GN=IQCB1 PE=1 SV=1	HUMAN	0	0.7851	0.8232	0.711	0.8825
1205	11.22	12.67	65.6	sp|Q13084|RM28_HUMAN	39S ribosomal protein L28, mitochondrial OS=Homo sapiens GN=MRPL28 PE=1 SV=4	HUMAN	10	0.7851	0.9759	0.9043	0.8826
649	18.87	31.66	70.6	sp|P27348|1433T_HUMAN	14-3-3 protein theta OS=Homo sapiens GN=YWHAQ PE=1 SV=1	HUMAN	32	0.7853	0.9292	0.8411	0.8827
1295	10.34	10.54	58.2	sp|P61923|COPZ1_HUMAN	Coatomer subunit zeta-1 OS=Homo sapiens GN=COPZ1 PE=1 SV=1	HUMAN	6	0.7854	0.9344	0.8152	0.8831
2207	5.18	5.47	22.3	sp|P18887|XRCC1_HUMAN	DNA repair protein XRCC1 OS=Homo sapiens GN=XRCC1 PE=1 SV=2	HUMAN	4	0.7854	0.6641	1.1583	0.8834
1865	6.46	6.87	26.8	sp|O60934|NBN_HUMAN	Nibrin OS=Homo sapiens GN=NBN PE=1 SV=1	HUMAN	4	0.7855	1.0691	0.7619	0.8835
4020	0.93	0.94	12	sp|Q99828|CIB1_HUMAN	Calcium and integrin-binding protein 1 OS=Homo sapiens GN=CIB1 PE=1 SV=4	HUMAN	1	0.7855	3.4566	0.4035	0.8836
845	15.54	16.38	41	sp|P52292|IMA2_HUMAN	Importin subunit alpha-2 OS=Homo sapiens GN=KPNA2 PE=1 SV=1	HUMAN	17	0.7856	0.9061	0.7832	0.8836
1276	10.51	11.26	93	sp|O60234|GMFG_HUMAN	Glia maturation factor gamma OS=Homo sapiens GN=GMFG PE=1 SV=1	HUMAN	14	0.7856	0.917	0.8462	0.8836
2238	5.01	5.06	24.7	sp|P08311|CATG_HUMAN	Cathepsin G OS=Homo sapiens GN=CTSG PE=1 SV=2	HUMAN	3	0.7856	1.1089	0.8325	0.884
2285	4.75	5.33	29.1	sp|Q8IYI6|EXOC8_HUMAN	Exocyst complex component 8 OS=Homo sapiens GN=EXOC8 PE=1 SV=2	HUMAN	2	0.7857	0.8678	0.6816	0.8842
245	36.4	39.02	50.9	sp|O00571|DDX3X_HUMAN	ATP-dependent RNA helicase DDX3X OS=Homo sapiens GN=DDX3X PE=1 SV=3	HUMAN	25	0.7858	0.8904	0.8589	0.8843
1389	9.7	9.83	30.9	sp|Q7L5N1|CSN6_HUMAN	COP9 signalosome complex subunit 6 OS=Homo sapiens GN=COPS6 PE=1 SV=1	HUMAN	9	0.7858	0.9345	0.8998	0.8847
802	16.45	16.58	53.7	sp|Q12907|LMAN2_HUMAN	Vesicular integral-membrane protein VIP36 OS=Homo sapiens GN=LMAN2 PE=1 SV=1	HUMAN	13	0.7859	0.8833	0.7728	0.8849
1724	7.38	9.87	30.6	sp|Q9Y4E8|UBP15_HUMAN	Ubiquitin carboxyl-terminal hydrolase 15 OS=Homo sapiens GN=USP15 PE=1 SV=3	HUMAN	7	0.786	0.9123	0.8909	0.885
2661	3.95	4.19	34	sp|P49137|MAPK2_HUMAN	MAP kinase-activated protein kinase 2 OS=Homo sapiens GN=MAPKAPK2 PE=1 SV=1	HUMAN	3	0.786	0.9375	0.8765	0.885
3517	2	2.32	30	sp|Q9Y2V7|COG6_HUMAN	Conserved oligomeric Golgi complex subunit 6 OS=Homo sapiens GN=COG6 PE=1 SV=2	HUMAN	1	0.786	0.9727	1.0087	0.8854
26	91.93	92.46	65.3	sp|Q00839|HNRPU_HUMAN	Heterogeneous nuclear ribonucleoprotein U OS=Homo sapiens GN=HNRNPU PE=1 SV=6	HUMAN	116	0.7863	0.9954	0.8563	0.8854
2544	4.01	4.34	21.6	sp|Q7Z7A4|PXK_HUMAN	PX domain-containing protein kinase-like protein OS=Homo sapiens GN=PXK PE=1 SV=1	HUMAN	5	0.7864	0.6964	1.0934	0.8857
1491	8.77	9.94	41.2	sp|Q13618|CUL3_HUMAN	Cullin-3 OS=Homo sapiens GN=CUL3 PE=1 SV=2	HUMAN	6	0.7865	0.9411	0.9058	0.8859
753	17.18	17.36	68.3	sp|P04792|HSPB1_HUMAN	Heat shock protein beta-1 OS=Homo sapiens GN=HSPB1 PE=1 SV=2	HUMAN	16	0.7869	0.9046	0.8286	0.8863
62	69.59	74.78	72.4	sp|P02545|LMNA_HUMAN	Prelamin-A/C OS=Homo sapiens GN=LMNA PE=1 SV=1	HUMAN	57	0.787	0.9262	0.858	0.8865
1182	11.45	13.1	24.7	sp|Q07864|DPOE1_HUMAN	DNA polymerase epsilon catalytic subunit A OS=Homo sapiens GN=POLE PE=1 SV=5	HUMAN	8	0.787	1.0387	0.7673	0.8865
3512	2	2.35	43.5	sp|Q8N2M8|CLASR_HUMAN	CLK4-associating serine/arginine rich protein OS=Homo sapiens GN=CLASRP PE=1 SV=4	HUMAN	1	0.7871	0.7902	0.8575	0.8866
3575	2	2.14	33.3	sp|Q13505|MTX1_HUMAN	Metaxin-1 OS=Homo sapiens GN=MTX1 PE=1 SV=2	HUMAN	1	0.7874	0.9208	0.7586	0.8868
2055	6	6.02	30.4	sp|Q15018|F175B_HUMAN	BRISC complex subunit Abro1 OS=Homo sapiens GN=FAM175B PE=1 SV=2	HUMAN	3	0.7875	0.8431	0.856	0.8868
2	277.53	278.01	85.5	sp|P35579|MYH9_HUMAN	Myosin-9 OS=Homo sapiens GN=MYH9 PE=1 SV=4	HUMAN	262	0.7875	0.951	0.8253	0.8871
1438	9.25	9.92	38.6	sp|O75955|FLOT1_HUMAN	Flotillin-1 OS=Homo sapiens GN=FLOT1 PE=1 SV=3	HUMAN	5	0.7879	0.8995	0.979	0.8872
53	74.87	75.57	76.2	sp|P13010|XRCC5_HUMAN	X-ray repair cross-complementing protein 5 OS=Homo sapiens GN=XRCC5 PE=1 SV=3	HUMAN	56	0.7879	1.0202	0.9029	0.8873
489	22.72	23.63	46.6	sp|P50502|F10A1_HUMAN	Hsc70-interacting protein OS=Homo sapiens GN=ST13 PE=1 SV=2	HUMAN	15	0.788	0.9591	0.8032	0.8873
1145	11.99	12.33	73.5	sp|P61313|RL15_HUMAN	60S ribosomal protein L15 OS=Homo sapiens GN=RPL15 PE=1 SV=2	HUMAN	15	0.7882	0.9442	0.796	0.8874
862	15.34	15.42	57.8	sp|P46782|RS5_HUMAN	40S ribosomal protein S5 OS=Homo sapiens GN=RPS5 PE=1 SV=4	HUMAN	23	0.7882	0.9016	0.8598	0.8874
3944	1.19	1.23	21.8	sp|P42858|HD_HUMAN	Huntingtin OS=Homo sapiens GN=HTT PE=1 SV=2	HUMAN	1	0.7884	0.7129	0.7599	0.8875
1680	7.7	8.74	37.9	sp|P53990|IST1_HUMAN	IST1 homolog OS=Homo sapiens GN=IST1 PE=1 SV=1	HUMAN	5	0.7884	0.7734	0.8944	0.8876
2072	5.95	5.99	29.3	sp|Q10469|MGAT2_HUMAN	Alpha-1,6-mannosyl-glycoprotein 2-beta-N-acetylglucosaminyltransferase OS=Homo sapiens GN=MGAT2 PE=1 SV=1	HUMAN	3	0.7884	0.9976	0.8286	0.8877
3825	1.68	1.69	28.8	sp|Q9Y240|CLC11_HUMAN	C-type lectin domain family 11 member A OS=Homo sapiens GN=CLEC11A PE=1 SV=1	HUMAN	1	0.7885	0.7025	0.5169	0.8879
252	35.9	36.41	79.5	sp|O60664|PLIN3_HUMAN	Perilipin-3 OS=Homo sapiens GN=PLIN3 PE=1 SV=3	HUMAN	28	0.7886	0.8249	0.8152	0.888
3058	2.34	2.51	31.6	sp|Q9HBR0|S38AA_HUMAN	Putative sodium-coupled neutral amino acid transporter 10 OS=Homo sapiens GN=SLC38A10 PE=1 SV=2	HUMAN	2	0.7886	0.7705	1.0253	0.888
3578	2	2.14	23.2	sp|Q9H7L9|SDS3_HUMAN	Sin3 histone deacetylase corepressor complex component SDS3 OS=Homo sapiens GN=SUDS3 PE=1 SV=2	HUMAN	1	0.7886	0.976	0.8173	0.8882
110	54.69	56.92	92.9	sp|P16401|H15_HUMAN	Histone H1.5 OS=Homo sapiens GN=HIST1H1B PE=1 SV=3	HUMAN	37	0.7886	1.0084	0.823	0.8883
179	42.64	74.45	67.3	sp|P12814|ACTN1_HUMAN	Alpha-actinin-1 OS=Homo sapiens GN=ACTN1 PE=1 SV=2	HUMAN	68	0.7889	0.9673	0.8295	0.8883
777	16.74	19.05	44.2	sp|O14929|HAT1_HUMAN	Histone acetyltransferase type B catalytic subunit OS=Homo sapiens GN=HAT1 PE=1 SV=1	HUMAN	19	0.789	0.9843	0.7997	0.8885
3694	2	2.02	12.5	sp|Q96EV8|DTBP1_HUMAN	Dysbindin OS=Homo sapiens GN=DTNBP1 PE=1 SV=1	HUMAN	1	0.7891	0.8822	0.6283	0.8885
1888	6.34	7.15	57	sp|P41208|CETN2_HUMAN	Centrin-2 OS=Homo sapiens GN=CETN2 PE=1 SV=1	HUMAN	5	0.7891	0.9091	0.8561	0.8885
712	17.86	17.91	58.2	sp|Q9Y315|DEOC_HUMAN	Putative deoxyribose-phosphate aldolase OS=Homo sapiens GN=DERA PE=1 SV=2	HUMAN	10	0.7891	1.0101	0.8537	0.8889
1454	9.07	9.08	66	sp|P09132|SRP19_HUMAN	Signal recognition particle 19 kDa protein OS=Homo sapiens GN=SRP19 PE=1 SV=3	HUMAN	8	0.7891	0.9491	0.9303	0.8895
1541	8.38	9.13	32	sp|Q92615|LAR4B_HUMAN	La-related protein 4B OS=Homo sapiens GN=LARP4B PE=1 SV=3	HUMAN	5	0.7891	1.2402	0.7301	0.8896
960	14.02	14.84	40.9	sp|Q7Z478|DHX29_HUMAN	ATP-dependent RNA helicase DHX29 OS=Homo sapiens GN=DHX29 PE=1 SV=2	HUMAN	7	0.7892	0.9753	0.7784	0.8896
193	41.53	41.58	83.9	sp|Q06830|PRDX1_HUMAN	Peroxiredoxin-1 OS=Homo sapiens GN=PRDX1 PE=1 SV=1	HUMAN	38	0.7892	0.9647	0.8492	0.8896
139	47.68	49.22	72.2	sp|P49915|GUAA_HUMAN	GMP synthase [glutamine-hydrolyzing] OS=Homo sapiens GN=GMPS PE=1 SV=1	HUMAN	35	0.7893	1.0023	0.7473	0.8897
932	14.37	14.93	72.4	sp|P51452|DUS3_HUMAN	Dual specificity protein phosphatase 3 OS=Homo sapiens GN=DUSP3 PE=1 SV=1	HUMAN	11	0.7893	0.9682	0.8315	0.8897
191	41.71	45.8	51.5	sp|P49321|NASP_HUMAN	Nuclear autoantigenic sperm protein OS=Homo sapiens GN=NASP PE=1 SV=2	HUMAN	51	0.7893	0.9591	0.8875	0.89
745	17.29	20.95	69.2	sp|P26196|DDX6_HUMAN	Probable ATP-dependent RNA helicase DDX6 OS=Homo sapiens GN=DDX6 PE=1 SV=2	HUMAN	17	0.7894	0.9155	0.8073	0.89
387	26.35	28.86	42.1	sp|Q09028|RBBP4_HUMAN	Histone-binding protein RBBP4 OS=Homo sapiens GN=RBBP4 PE=1 SV=3	HUMAN	25	0.7894	0.9135	0.8354	0.8902
1822	6.74	6.74	47.6	sp|O95218|ZRAB2_HUMAN	Zinc finger Ran-binding domain-containing protein 2 OS=Homo sapiens GN=ZRANB2 PE=1 SV=2	HUMAN	5	0.7894	0.9898	0.7819	0.8903
398	26.01	26.09	51.5	sp|P26641|EF1G_HUMAN	Elongation factor 1-gamma OS=Homo sapiens GN=EEF1G PE=1 SV=3	HUMAN	30	0.7895	0.9404	0.851	0.8905
143	47.04	47.33	56.8	sp|P27824|CALX_HUMAN	Calnexin OS=Homo sapiens GN=CANX PE=1 SV=2	HUMAN	43	0.7896	0.9828	0.8408	0.8906
942	14.19	14.28	78.9	sp|P52565|GDIR1_HUMAN	Rho GDP-dissociation inhibitor 1 OS=Homo sapiens GN=ARHGDIA PE=1 SV=3	HUMAN	11	0.7897	0.9769	0.8306	0.8908
597	20.05	20.61	62.2	sp|P38159|RBMX_HUMAN	RNA-binding motif protein, X chromosome OS=Homo sapiens GN=RBMX PE=1 SV=3	HUMAN	16	0.7899	1.0663	0.8017	0.8908
162	44.78	44.91	81.1	sp|P63244|GBLP_HUMAN	Guanine nucleotide-binding protein subunit beta-2-like 1 OS=Homo sapiens GN=GNB2L1 PE=1 SV=3	HUMAN	52	0.79	0.9059	0.8394	0.8909
2296	4.73	4.75	48.2	sp|Q9Y316|MEMO1_HUMAN	Protein MEMO1 OS=Homo sapiens GN=MEMO1 PE=1 SV=1	HUMAN	7	0.7902	0.816	0.7568	0.891
182	42.42	43.14	77.5	sp|Q13177|PAK2_HUMAN	Serine/threonine-protein kinase PAK 2 OS=Homo sapiens GN=PAK2 PE=1 SV=3	HUMAN	34	0.7904	0.9741	0.773	0.8912
3942	1.21	1.47	21.3	sp|Q96RT1|LAP2_HUMAN	Protein LAP2 OS=Homo sapiens GN=ERBB2IP PE=1 SV=2	HUMAN	1	0.7905	0.9837	0.814	0.8912
1593	8.11	8.21	34.7	sp|P49247|RPIA_HUMAN	Ribose-5-phosphate isomerase OS=Homo sapiens GN=RPIA PE=1 SV=3	HUMAN	5	0.7906	1.0138	0.7531	0.8913
3123	2.19	2.32	40.7	sp|P17174|AATC_HUMAN	Aspartate aminotransferase, cytoplasmic OS=Homo sapiens GN=GOT1 PE=1 SV=3	HUMAN	2	0.7906	0.968	0.8619	0.8914
3439	2.01	2.05	32.9	sp|Q8N4T8|CBR4_HUMAN	Carbonyl reductase family member 4 OS=Homo sapiens GN=CBR4 PE=1 SV=3	HUMAN	1	0.7907	1.1646	0.6623	0.8916
699	18.07	18.45	71.4	sp|Q9UHD1|CHRD1_HUMAN	Cysteine and histidine-rich domain-containing protein 1 OS=Homo sapiens GN=CHORDC1 PE=1 SV=2	HUMAN	13	0.7907	0.9357	0.8478	0.8916
2148	5.5	5.56	26.3	sp|Q15293|RCN1_HUMAN	Reticulocalbin-1 OS=Homo sapiens GN=RCN1 PE=1 SV=1	HUMAN	3	0.7907	1.0864	0.8109	0.8917
4080	0.76	0.78	28.6	sp|Q9BWN1|PRR14_HUMAN	Proline-rich protein 14 OS=Homo sapiens GN=PRR14 PE=1 SV=1	HUMAN	1	0.791	0.6696	0.8618	0.8918
2997	2.49	3.55	26.3	sp|Q92538|GBF1_HUMAN	Golgi-specific brefeldin A-resistance guanine nucleotide exchange factor 1 OS=Homo sapiens GN=GBF1 PE=1 SV=2	HUMAN	5	0.791	0.8414	0.8395	0.8918
89	60.31	63.19	78	sp|P40227|TCPZ_HUMAN	T-complex protein 1 subunit zeta OS=Homo sapiens GN=CCT6A PE=1 SV=3	HUMAN	64	0.791	0.9702	0.8369	0.892
2018	6.01	6.57	34.1	sp|Q6NZY4|ZCHC8_HUMAN	Zinc finger CCHC domain-containing protein 8 OS=Homo sapiens GN=ZCCHC8 PE=1 SV=2	HUMAN	4	0.7911	0.7804	0.8236	0.892
2749	3.55	5.77	40.9	sp|Q02809|PLOD1_HUMAN	Procollagen-lysine,2-oxoglutarate 5-dioxygenase 1 OS=Homo sapiens GN=PLOD1 PE=1 SV=2	HUMAN	3	0.7911	0.6811	1.0661	0.892
32	87.76	87.88	84.7	sp|P07437|TBB5_HUMAN	Tubulin beta chain OS=Homo sapiens GN=TUBB PE=1 SV=2	HUMAN	182	0.7913	0.9602	0.8103	0.8922
8	145.78	146.82	90.1	sp|P06733|ENOA_HUMAN	Alpha-enolase OS=Homo sapiens GN=ENO1 PE=1 SV=2	HUMAN	211	0.7914	0.9493	0.8399	0.8923
4185	0.49	0.86	35.2	sp|Q5T3J3|LRIF1_HUMAN	Ligand-dependent nuclear receptor-interacting factor 1 OS=Homo sapiens GN=LRIF1 PE=1 SV=1	HUMAN	1	0.7915	0.6606	0.531	0.8923
2876	3.01	3.06	24.1	sp|Q9Y6W5|WASF2_HUMAN	Wiskott-Aldrich syndrome protein family member 2 OS=Homo sapiens GN=WASF2 PE=1 SV=3	HUMAN	2	0.7918	0.9138	1.0458	0.8924
1645	7.97	10.43	79	sp|Q15843|NEDD8_HUMAN	NEDD8 OS=Homo sapiens GN=NEDD8 PE=1 SV=1	HUMAN	6	0.7919	0.9838	0.8015	0.8929
156	45.63	47.12	74.3	sp|P05455|LA_HUMAN	Lupus La protein OS=Homo sapiens GN=SSB PE=1 SV=2	HUMAN	27	0.7919	0.9715	0.8483	0.8935
198	40.31	41.66	84.7	sp|P18669|PGAM1_HUMAN	Phosphoglycerate mutase 1 OS=Homo sapiens GN=PGAM1 PE=1 SV=2	HUMAN	51	0.7922	0.9584	0.7922	0.8935
891	14.9	14.91	60.9	sp|Q13765|NACA_HUMAN	Nascent polypeptide-associated complex subunit alpha OS=Homo sapiens GN=NACA PE=1 SV=1	HUMAN	13	0.7922	0.8979	0.9149	0.8936
261	34.96	39.75	68.7	sp|P62753|RS6_HUMAN	40S ribosomal protein S6 OS=Homo sapiens GN=RPS6 PE=1 SV=1	HUMAN	29	0.7923	0.94	0.829	0.8936
4075	0.76	4.3	46.7	sp|P63092|GNAS2_HUMAN	Guanine nucleotide-binding protein G(s) subunit alpha isoforms short OS=Homo sapiens GN=GNAS PE=1 SV=1	HUMAN	3	0.7924	0.8223	0.8268	0.8936
2457	4.09	4.12	22.8	sp|O00764|PDXK_HUMAN	Pyridoxal kinase OS=Homo sapiens GN=PDXK PE=1 SV=1	HUMAN	4	0.7926	1.3723	0.6186	0.8937
1375	9.82	9.96	76.5	sp|P61353|RL27_HUMAN	60S ribosomal protein L27 OS=Homo sapiens GN=RPL27 PE=1 SV=2	HUMAN	9	0.7926	1.0379	0.8349	0.8938
4168	0.53	0.56	33.5	sp|Q9NP77|SSU72_HUMAN	RNA polymerase II subunit A C-terminal domain phosphatase SSU72 OS=Homo sapiens GN=SSU72 PE=1 SV=1	HUMAN	1	0.7926	1.0576	1.0014	0.8938
3101	2.22	2.65	25.9	sp|Q7L9L4|MOB1B_HUMAN	MOB kinase activator 1B OS=Homo sapiens GN=MOB1B PE=1 SV=3	HUMAN	3	0.7927	1.0169	0.8117	0.8939
3617	2	2.07	35.2	sp|P20248|CCNA2_HUMAN	Cyclin-A2 OS=Homo sapiens GN=CCNA2 PE=1 SV=2	HUMAN	1	0.7927	1.0898	0.8185	0.8942
2154	5.45	5.95	24.3	sp|Q9HD45|TM9S3_HUMAN	Transmembrane 9 superfamily member 3 OS=Homo sapiens GN=TM9SF3 PE=1 SV=2	HUMAN	4	0.7928	0.8349	0.9123	0.8946
1383	9.76	10.12	39.6	sp|Q7L2H7|EIF3M_HUMAN	Eukaryotic translation initiation factor 3 subunit M OS=Homo sapiens GN=EIF3M PE=1 SV=1	HUMAN	11	0.7928	0.9616	0.8427	0.895
2159	5.42	6.47	20.8	sp|Q96CU9|FXRD1_HUMAN	FAD-dependent oxidoreductase domain-containing protein 1 OS=Homo sapiens GN=FOXRED1 PE=1 SV=2	HUMAN	4	0.7928	0.9036	0.94	0.8953
4208	0.45	0.48	45.6	sp|P06703|S10A6_HUMAN	Protein S100-A6 OS=Homo sapiens GN=S100A6 PE=1 SV=1	HUMAN	0	0.793	0.6557	2.2591	0.8954
80	63.6	65.49	86.3	sp|P50991|TCPD_HUMAN	T-complex protein 1 subunit delta OS=Homo sapiens GN=CCT4 PE=1 SV=4	HUMAN	60	0.7931	0.9728	0.8254	0.8956
425	25.02	26.58	66	sp|P49189|AL9A1_HUMAN	4-trimethylaminobutyraldehyde dehydrogenase OS=Homo sapiens GN=ALDH9A1 PE=1 SV=3	HUMAN	18	0.7932	0.9284	0.8309	0.8959
1592	8.11	8.35	29	sp|O96028|NSD2_HUMAN	Histone-lysine N-methyltransferase NSD2 OS=Homo sapiens GN=WHSC1 PE=1 SV=1	HUMAN	5	0.7933	0.8989	0.6815	0.8962
1062	12.79	13.13	54.8	sp|Q6P1J9|CDC73_HUMAN	Parafibromin OS=Homo sapiens GN=CDC73 PE=1 SV=1	HUMAN	9	0.7933	0.8693	0.8785	0.8964
75	65.59	71.88	73.6	sp|P34932|HSP74_HUMAN	Heat shock 70 kDa protein 4 OS=Homo sapiens GN=HSPA4 PE=1 SV=4	HUMAN	57	0.7933	0.9904	0.8103	0.8968
2546	4.01	4.32	43.6	sp|O75934|SPF27_HUMAN	Pre-mRNA-splicing factor SPF27 OS=Homo sapiens GN=BCAS2 PE=1 SV=1	HUMAN	3	0.7933	0.9348	0.9041	0.8969
1367	9.89	9.92	52	sp|Q9BRA2|TXD17_HUMAN	Thioredoxin domain-containing protein 17 OS=Homo sapiens GN=TXNDC17 PE=1 SV=1	HUMAN	9	0.7934	0.9863	0.7866	0.897
2448	4.11	4.16	39	sp|Q13642|FHL1_HUMAN	Four and a half LIM domains protein 1 OS=Homo sapiens GN=FHL1 PE=1 SV=4	HUMAN	2	0.7934	1.1714	0.8566	0.897
1085	12.51	13.25	28.4	sp|Q86TI2|DPP9_HUMAN	Dipeptidyl peptidase 9 OS=Homo sapiens GN=DPP9 PE=1 SV=3	HUMAN	6	0.7936	1.1383	0.6963	0.8971
1598	8.07	9.02	25.6	sp|Q7Z4Q2|HEAT3_HUMAN	HEAT repeat-containing protein 3 OS=Homo sapiens GN=HEATR3 PE=1 SV=2	HUMAN	4	0.7936	1.1862	0.7311	0.8973
1195	11.34	12.07	37.2	sp|O43719|HTSF1_HUMAN	HIV Tat-specific factor 1 OS=Homo sapiens GN=HTATSF1 PE=1 SV=1	HUMAN	9	0.7936	1.0401	0.8895	0.8974
4147	0.57	2.42	34.1	sp|Q8WV93|LACE1_HUMAN	Lactation elevated protein 1 OS=Homo sapiens GN=LACE1 PE=2 SV=2	HUMAN	2	0.7936	1.0202	0.9808	0.8975
947	14.12	14.26	75.8	sp|P49755|TMEDA_HUMAN	Transmembrane emp24 domain-containing protein 10 OS=Homo sapiens GN=TMED10 PE=1 SV=2	HUMAN	13	0.7938	1.0021	0.8747	0.8977
214	39.32	40.95	71.5	sp|P28838|AMPL_HUMAN	Cytosol aminopeptidase OS=Homo sapiens GN=LAP3 PE=1 SV=3	HUMAN	33	0.794	0.9828	0.8383	0.8979
2472	4.06	4.71	27.8	sp|O15091|MRRP3_HUMAN	Mitochondrial ribonuclease P protein 3 OS=Homo sapiens GN=KIAA0391 PE=1 SV=2	HUMAN	3	0.7942	0.9147	0.5895	0.8981
754	17.17	17.71	55.3	sp|P62873|GBB1_HUMAN	Guanine nucleotide-binding protein G(I)/G(S)/G(T) subunit beta-1 OS=Homo sapiens GN=GNB1 PE=1 SV=3	HUMAN	16	0.7945	0.9728	0.7422	0.8983
3224	2.06	2.09	19.6	sp|Q9H900|ZWILC_HUMAN	Protein zwilch homolog OS=Homo sapiens GN=ZWILCH PE=1 SV=2	HUMAN	1	0.7945	0.9831	0.8678	0.8983
2222	5.08	5.83	40.7	sp|Q8N6H7|ARFG2_HUMAN	ADP-ribosylation factor GTPase-activating protein 2 OS=Homo sapiens GN=ARFGAP2 PE=1 SV=1	HUMAN	3	0.7946	0.8846	0.9252	0.8986
3680	2	2.02	32.4	sp|Q14814|MEF2D_HUMAN	Myocyte-specific enhancer factor 2D OS=Homo sapiens GN=MEF2D PE=1 SV=1	HUMAN	1	0.7949	0.9823	0.6405	0.8986
2601	4	4.14	28.9	sp|Q13510|ASAH1_HUMAN	Acid ceramidase OS=Homo sapiens GN=ASAH1 PE=1 SV=5	HUMAN	2	0.7951	1.1247	1.0254	0.8986
3251	2.04	2.29	37.6	sp|Q13884|SNTB1_HUMAN	Beta-1-syntrophin OS=Homo sapiens GN=SNTB1 PE=1 SV=3	HUMAN	2	0.7955	1.2101	0.5526	0.8987
2321	4.59	4.78	46.8	sp|Q9HBL8|NMRL1_HUMAN	NmrA-like family domain-containing protein 1 OS=Homo sapiens GN=NMRAL1 PE=1 SV=1	HUMAN	3	0.7955	0.6957	0.973	0.8988
527	21.63	22.81	33.1	sp|P98171|RHG04_HUMAN	Rho GTPase-activating protein 4 OS=Homo sapiens GN=ARHGAP4 PE=1 SV=2	HUMAN	12	0.7955	0.9811	0.8125	0.8989
18	106.43	117.14	86.9	sp|P11021|GRP78_HUMAN	78 kDa glucose-regulated protein OS=Homo sapiens GN=HSPA5 PE=1 SV=2	HUMAN	106	0.7955	0.97	0.8542	0.8989
15	120.62	121.4	88.5	sp|P14618|KPYM_HUMAN	Pyruvate kinase isozymes M1/M2 OS=Homo sapiens GN=PKM PE=1 SV=4	HUMAN	129	0.7956	0.9821	0.8549	0.8989
2031	6	10.5	71.1	sp|P0C0S5|H2AZ_HUMAN	Histone H2A.Z OS=Homo sapiens GN=H2AFZ PE=1 SV=2	HUMAN	10	0.7956	1.0416	0.8162	0.899
1502	8.7	10.04	50.4	sp|P17612|KAPCA_HUMAN	cAMP-dependent protein kinase catalytic subunit alpha OS=Homo sapiens GN=PRKACA PE=1 SV=2	HUMAN	6	0.7957	0.8816	0.7078	0.8991
4822	0.06	0.39	24	sp|O75037|KI21B_HUMAN	Kinesin-like protein KIF21B OS=Homo sapiens GN=KIF21B PE=1 SV=2	HUMAN	0	0.7959	1.289	0.7876	0.8993
3289	2.03	2.06	31.3	sp|Q9HCJ6|VAT1L_HUMAN	Synaptic vesicle membrane protein VAT-1 homolog-like OS=Homo sapiens GN=VAT1L PE=1 SV=2	HUMAN	1	0.796	1.2379	0.8994	0.8994
625	19.56	21.54	77.2	sp|P61586|RHOA_HUMAN	Transforming protein RhoA OS=Homo sapiens GN=RHOA PE=1 SV=1	HUMAN	23	0.7961	1.0022	0.8392	0.8995
1339	10.03	11.26	37.6	sp|O15042|SR140_HUMAN	U2 snRNP-associated SURP motif-containing protein OS=Homo sapiens GN=U2SURP PE=1 SV=2	HUMAN	8	0.7962	0.8869	0.8655	0.8995
547	21.17	22.02	40.2	sp|P22307|NLTP_HUMAN	Non-specific lipid-transfer protein OS=Homo sapiens GN=SCP2 PE=1 SV=2	HUMAN	16	0.7962	0.9584	0.861	0.8997
353	27.68	28.01	66.5	sp|P23381|SYWC_HUMAN	Tryptophan--tRNA ligase, cytoplasmic OS=Homo sapiens GN=WARS PE=1 SV=2	HUMAN	22	0.7963	0.9318	0.886	0.8997
1482	8.86	9.04	47.2	sp|Q14232|EI2BA_HUMAN	Translation initiation factor eIF-2B subunit alpha OS=Homo sapiens GN=EIF2B1 PE=1 SV=1	HUMAN	6	0.7964	1.0109	0.8992	0.8998
1486	8.81	10.53	61.5	sp|Q9UL46|PSME2_HUMAN	Proteasome activator complex subunit 2 OS=Homo sapiens GN=PSME2 PE=1 SV=4	HUMAN	7	0.7966	1.0713	0.7874	0.8998
2230	5.05	5.09	23	sp|P11279|LAMP1_HUMAN	Lysosome-associated membrane glycoprotein 1 OS=Homo sapiens GN=LAMP1 PE=1 SV=3	HUMAN	4	0.7966	0.8948	1.0978	0.8999
3155	2.14	2.16	24.9	sp|Q7KZN9|COX15_HUMAN	Cytochrome c oxidase assembly protein COX15 homolog OS=Homo sapiens GN=COX15 PE=1 SV=1	HUMAN	1	0.7968	0.8983	1.214	0.9001
1429	9.33	9.34	68.6	sp|Q14847|LASP1_HUMAN	LIM and SH3 domain protein 1 OS=Homo sapiens GN=LASP1 PE=1 SV=2	HUMAN	7	0.7971	0.8299	0.8022	0.9002
400	25.9	27.75	25.2	sp|Q14974|IMB1_HUMAN	Importin subunit beta-1 OS=Homo sapiens GN=KPNB1 PE=1 SV=2	HUMAN	23	0.7973	0.9927	0.8413	0.9002
1341	10.03	10.56	35.1	sp|Q8IY17|PLPL6_HUMAN	Neuropathy target esterase OS=Homo sapiens GN=PNPLA6 PE=1 SV=2	HUMAN	5	0.7974	1.0745	0.6123	0.9004
1263	10.64	10.94	49.1	sp|Q96FW1|OTUB1_HUMAN	Ubiquitin thioesterase OTUB1 OS=Homo sapiens GN=OTUB1 PE=1 SV=2	HUMAN	9	0.7974	0.9449	0.8039	0.9005
512	21.98	32.98	46.1	sp|P52789|HXK2_HUMAN	Hexokinase-2 OS=Homo sapiens GN=HK2 PE=1 SV=2	HUMAN	19	0.7975	0.9459	0.7721	0.9005
332	28.71	31.8	81.2	sp|Q9NQR4|NIT2_HUMAN	Omega-amidase NIT2 OS=Homo sapiens GN=NIT2 PE=1 SV=1	HUMAN	15	0.7975	1.0399	0.8078	0.9005
1371	9.86	10.26	42.8	sp|Q9UBW5|BIN2_HUMAN	Bridging integrator 2 OS=Homo sapiens GN=BIN2 PE=1 SV=3	HUMAN	6	0.7976	0.9311	0.816	0.9007
738	17.41	17.51	50	sp|Q00688|FKBP3_HUMAN	Peptidyl-prolyl cis-trans isomerase FKBP3 OS=Homo sapiens GN=FKBP3 PE=1 SV=1	HUMAN	13	0.7977	0.9502	0.8316	0.9008
1043	13.06	13.52	58.5	sp|O75822|EIF3J_HUMAN	Eukaryotic translation initiation factor 3 subunit J OS=Homo sapiens GN=EIF3J PE=1 SV=2	HUMAN	8	0.7977	0.9777	0.8291	0.9009
2239	5.01	5.03	19.4	sp|Q01196|RUNX1_HUMAN	Runt-related transcription factor 1 OS=Homo sapiens GN=RUNX1 PE=1 SV=3	HUMAN	4	0.7977	1.0156	0.8869	0.9009
2615	4	4.07	40.9	sp|Q8IXJ6|SIR2_HUMAN	NAD-dependent protein deacetylase sirtuin-2 OS=Homo sapiens GN=SIRT2 PE=1 SV=2	HUMAN	2	0.7978	0.7089	0.9075	0.9011
2647	4	4.01	63.2	sp|Q9Y3D7|TIM16_HUMAN	Mitochondrial import inner membrane translocase subunit TIM16 OS=Homo sapiens GN=PAM16 PE=1 SV=2	HUMAN	3	0.7979	0.8806	0.8085	0.9012
2158	5.42	9.1	54.2	sp|Q9Y6E2|BZW2_HUMAN	Basic leucine zipper and W2 domain-containing protein 2 OS=Homo sapiens GN=BZW2 PE=1 SV=1	HUMAN	6	0.7979	0.9547	0.8182	0.9014
351	27.78	27.9	85.5	sp|P62269|RS18_HUMAN	40S ribosomal protein S18 OS=Homo sapiens GN=RPS18 PE=1 SV=3	HUMAN	24	0.7979	0.9289	0.8567	0.9017
2738	3.61	3.76	44.2	sp|A6NP81|GG8L2_HUMAN	Golgin subfamily A member 8-like protein 2 OS=Homo sapiens PE=2 SV=2	HUMAN	3	0.798	0.8991	0.8793	0.9017
2353	4.41	4.68	39.3	sp|Q6P1L8|RM14_HUMAN	39S ribosomal protein L14, mitochondrial OS=Homo sapiens GN=MRPL14 PE=1 SV=1	HUMAN	2	0.7981	0.9852	1.1208	0.9018
3395	2.01	2.25	25.8	sp|P49641|MA2A2_HUMAN	Alpha-mannosidase 2x OS=Homo sapiens GN=MAN2A2 PE=2 SV=3	HUMAN	1	0.7982	0.7555	0.6975	0.9019
2690	3.82	3.87	48.3	sp|Q13356|PPIL2_HUMAN	Peptidyl-prolyl cis-trans isomerase-like 2 OS=Homo sapiens GN=PPIL2 PE=1 SV=1	HUMAN	2	0.7982	0.728	0.736	0.9019
1042	13.06	13.7	53.3	sp|Q9Y3U8|RL36_HUMAN	60S ribosomal protein L36 OS=Homo sapiens GN=RPL36 PE=1 SV=3	HUMAN	12	0.7982	0.9797	0.8212	0.902
1932	6.16	6.16	35.1	sp|Q96T60|PNKP_HUMAN	Bifunctional polynucleotide phosphatase/kinase OS=Homo sapiens GN=PNKP PE=1 SV=1	HUMAN	3	0.7984	0.9938	0.7068	0.9021
1357	9.99	10.04	50	sp|Q04760|LGUL_HUMAN	Lactoylglutathione lyase OS=Homo sapiens GN=GLO1 PE=1 SV=4	HUMAN	6	0.7985	1.008	0.8067	0.9021
2555	4.01	4.15	15.8	sp|Q9BXP2|S12A9_HUMAN	Solute carrier family 12 member 9 OS=Homo sapiens GN=SLC12A9 PE=1 SV=1	HUMAN	2	0.7986	1.087	0.4557	0.9022
4520	0.13	0.96	23.3	RRRRRsp|O95876|FRITZ_HUMAN	REVERSED WD repeat-containing and planar cell polarity effector protein fritz homolog OS=Homo sapiens GN=WDPCP PE=1 SV=2	HUMAN	1	0.7987	1.9205	0.6564	0.9022
773	16.81	39.29	77.5	sp|P06753|TPM3_HUMAN	Tropomyosin alpha-3 chain OS=Homo sapiens GN=TPM3 PE=1 SV=1	HUMAN	33	0.799	0.9828	0.7874	0.9022
2610	4	4.09	37.6	sp|Q9Y5J1|UTP18_HUMAN	U3 small nucleolar RNA-associated protein 18 homolog OS=Homo sapiens GN=UTP18 PE=1 SV=3	HUMAN	2	0.7991	0.9889	0.8943	0.9025
2850	3.09	4.95	82.1	sp|P56211|ARP19_HUMAN	cAMP-regulated phosphoprotein 19 OS=Homo sapiens GN=ARPP19 PE=1 SV=2	HUMAN	5	0.7992	0.9164	0.8416	0.9026
1069	12.72	12.83	44.8	sp|Q9UKL0|RCOR1_HUMAN	REST corepressor 1 OS=Homo sapiens GN=RCOR1 PE=1 SV=1	HUMAN	6	0.7992	1.0275	0.8592	0.9026
3769	1.88	2.42	22.1	sp|O43813|LANC1_HUMAN	LanC-like protein 1 OS=Homo sapiens GN=LANCL1 PE=1 SV=1	HUMAN	3	0.7992	0.8142	1.3446	0.9027
74	65.66	67.53	92.1	sp|P00558|PGK1_HUMAN	Phosphoglycerate kinase 1 OS=Homo sapiens GN=PGK1 PE=1 SV=3	HUMAN	83	0.7994	1.0083	0.8428	0.9028
294	31.58	32.8	68.2	sp|P20042|IF2B_HUMAN	Eukaryotic translation initiation factor 2 subunit 2 OS=Homo sapiens GN=EIF2S2 PE=1 SV=2	HUMAN	20	0.7995	0.9277	0.8884	0.9033
1427	9.33	9.88	54.7	sp|Q9Y5K8|VATD_HUMAN	V-type proton ATPase subunit D OS=Homo sapiens GN=ATP6V1D PE=1 SV=1	HUMAN	5	0.7996	1.0124	0.7824	0.9034
717	17.76	21.05	54.2	sp|Q9NVP1|DDX18_HUMAN	ATP-dependent RNA helicase DDX18 OS=Homo sapiens GN=DDX18 PE=1 SV=2	HUMAN	20	0.7997	0.9815	0.8293	0.9034
2334	4.5	5.28	40	sp|P49848|TAF6_HUMAN	Transcription initiation factor TFIID subunit 6 OS=Homo sapiens GN=TAF6 PE=1 SV=1	HUMAN	4	0.7998	0.7945	0.7095	0.9036
1469	8.96	10.64	68.3	sp|P42766|RL35_HUMAN	60S ribosomal protein L35 OS=Homo sapiens GN=RPL35 PE=1 SV=2	HUMAN	10	0.7998	0.9553	0.863	0.9038
1121	12.13	12.98	64.5	sp|P25787|PSA2_HUMAN	Proteasome subunit alpha type-2 OS=Homo sapiens GN=PSMA2 PE=1 SV=2	HUMAN	14	0.7998	0.968	0.8866	0.9038
918	14.54	14.76	48.8	sp|P51114|FXR1_HUMAN	Fragile X mental retardation syndrome-related protein 1 OS=Homo sapiens GN=FXR1 PE=1 SV=3	HUMAN	7	0.7998	0.9907	0.8702	0.9042
48	79.36	80.18	90.4	sp|P22626|ROA2_HUMAN	Heterogeneous nuclear ribonucleoproteins A2/B1 OS=Homo sapiens GN=HNRNPA2B1 PE=1 SV=2	HUMAN	136	0.7999	0.971	0.8448	0.9045
313	29.93	30.18	62.4	sp|P62424|RL7A_HUMAN	60S ribosomal protein L7a OS=Homo sapiens GN=RPL7A PE=1 SV=2	HUMAN	21	0.7999	0.9678	0.8785	0.9045
1031	13.19	13.21	49.4	sp|P18031|PTN1_HUMAN	Tyrosine-protein phosphatase non-receptor type 1 OS=Homo sapiens GN=PTPN1 PE=1 SV=1	HUMAN	8	0.8	0.9359	0.9181	0.9046
2220	5.1	5.56	28.1	sp|P13674|P4HA1_HUMAN	Prolyl 4-hydroxylase subunit alpha-1 OS=Homo sapiens GN=P4HA1 PE=1 SV=2	HUMAN	3	0.8002	0.9453	0.7527	0.9047
1037	13.13	14.09	45.2	sp|Q9P287|BCCIP_HUMAN	BRCA2 and CDKN1A-interacting protein OS=Homo sapiens GN=BCCIP PE=1 SV=1	HUMAN	10	0.8002	0.9809	0.7962	0.9048
1478	8.9	9.89	32.2	sp|Q6L8Q7|PDE12_HUMAN	2',5'-phosphodiesterase 12 OS=Homo sapiens GN=PDE12 PE=1 SV=2	HUMAN	5	0.8002	0.9654	0.8371	0.9048
1411	9.43	27.7	52.1	sp|O95757|HS74L_HUMAN	Heat shock 70 kDa protein 4L OS=Homo sapiens GN=HSPA4L PE=1 SV=3	HUMAN	21	0.8003	0.8146	0.9613	0.905
2135	5.57	5.6	23.9	sp|Q9H8Y8|GORS2_HUMAN	Golgi reassembly-stacking protein 2 OS=Homo sapiens GN=GORASP2 PE=1 SV=3	HUMAN	6	0.8005	0.9677	0.8847	0.9052
85	62.21	63.43	65.3	sp|Q13263|TIF1B_HUMAN	Transcription intermediary factor 1-beta OS=Homo sapiens GN=TRIM28 PE=1 SV=5	HUMAN	61	0.8007	0.9424	0.8248	0.9053
724	17.6	17.68	56.2	sp|P11766|ADHX_HUMAN	Alcohol dehydrogenase class-3 OS=Homo sapiens GN=ADH5 PE=1 SV=4	HUMAN	10	0.8007	0.9405	0.9137	0.9056
1686	7.66	8.08	57.9	sp|P25789|PSA4_HUMAN	Proteasome subunit alpha type-4 OS=Homo sapiens GN=PSMA4 PE=1 SV=1	HUMAN	4	0.8009	1.0076	0.7796	0.9057
69	66.92	69.44	83.2	sp|P78371|TCPB_HUMAN	T-complex protein 1 subunit beta OS=Homo sapiens GN=CCT2 PE=1 SV=4	HUMAN	70	0.8009	0.9629	0.8371	0.906
3574	2	2.14	24.9	sp|Q8NHH9|ATLA2_HUMAN	Atlastin-2 OS=Homo sapiens GN=ATL2 PE=1 SV=2	HUMAN	2	0.801	0.8996	0.8639	0.906
1386	9.74	9.78	48.1	sp|O75494|SRS10_HUMAN	Serine/arginine-rich splicing factor 10 OS=Homo sapiens GN=SRSF10 PE=1 SV=1	HUMAN	7	0.801	1.0314	0.7844	0.9063
1959	6.09	6.55	26.9	sp|Q6IN85|P4R3A_HUMAN	Serine/threonine-protein phosphatase 4 regulatory subunit 3A OS=Homo sapiens GN=SMEK1 PE=1 SV=1	HUMAN	3	0.8011	0.6733	0.8554	0.9066
3589	2	2.11	33.8	sp|O43402|EMC8_HUMAN	ER membrane protein complex subunit 8 OS=Homo sapiens GN=EMC8 PE=1 SV=1	HUMAN	1	0.8011	1.1565	0.6039	0.9066
3032	2.4	3	16.6	sp|Q8NEY8|PPHLN_HUMAN	Periphilin-1 OS=Homo sapiens GN=PPHLN1 PE=1 SV=2	HUMAN	2	0.8013	0.7707	0.8626	0.9066
1797	6.92	7	42.2	sp|P39687|AN32A_HUMAN	Acidic leucine-rich nuclear phosphoprotein 32 family member A OS=Homo sapiens GN=ANP32A PE=1 SV=1	HUMAN	4	0.8013	1.0231	0.6975	0.9067
205	39.9	40.24	53.8	sp|Q9Y678|COPG1_HUMAN	Coatomer subunit gamma-1 OS=Homo sapiens GN=COPG1 PE=1 SV=1	HUMAN	28	0.8013	0.9146	0.8709	0.9068
285	32.52	33.78	46	sp|O60841|IF2P_HUMAN	Eukaryotic translation initiation factor 5B OS=Homo sapiens GN=EIF5B PE=1 SV=4	HUMAN	20	0.8014	0.915	0.8682	0.907
95	58.3	58.67	89.2	sp|P60174|TPIS_HUMAN	Triosephosphate isomerase OS=Homo sapiens GN=TPI1 PE=1 SV=3	HUMAN	81	0.8014	0.9924	0.8372	0.907
2728	3.63	3.72	35	sp|Q9H6H4|REEP4_HUMAN	Receptor expression-enhancing protein 4 OS=Homo sapiens GN=REEP4 PE=1 SV=1	HUMAN	4	0.8015	0.8562	0.8054	0.9073
228	37.75	40.9	53.2	sp|Q9NTJ3|SMC4_HUMAN	Structural maintenance of chromosomes protein 4 OS=Homo sapiens GN=SMC4 PE=1 SV=2	HUMAN	21	0.8015	0.9828	0.83	0.9073
813	16.16	37.97	53.7	sp|Q13310|PABP4_HUMAN	Polyadenylate-binding protein 4 OS=Homo sapiens GN=PABPC4 PE=1 SV=1	HUMAN	30	0.8016	0.9165	0.8704	0.9073
1407	9.47	9.84	32.2	sp|Q15052|ARHG6_HUMAN	Rho guanine nucleotide exchange factor 6 OS=Homo sapiens GN=ARHGEF6 PE=1 SV=2	HUMAN	7	0.8019	1.0031	0.6917	0.9076
4968	0.05	0.14	19.5	sp|Q14687|GSE1_HUMAN	Genetic suppressor element 1 OS=Homo sapiens GN=GSE1 PE=1 SV=3	HUMAN	0	0.8019	1.3766	0.727	0.9077
2564	4.01	4.05	37.7	sp|Q9UBP6|TRMB_HUMAN	tRNA (guanine-N(7)-)-methyltransferase OS=Homo sapiens GN=METTL1 PE=1 SV=1	HUMAN	4	0.8019	1.1243	0.9734	0.9078
4595	0.11	0.24	16	RRRRRsp|Q92791|SC65_HUMAN	REVERSED Synaptonemal complex protein SC65 OS=Homo sapiens GN=LEPREL4 PE=1 SV=1	HUMAN	0	0.8019	0.7652	1.6598	0.9079
3901	1.38	1.59	28.1	sp|Q5R372|RBG1L_HUMAN	Rab GTPase-activating protein 1-like OS=Homo sapiens GN=RABGAP1L PE=1 SV=1	HUMAN	2	0.802	0.8317	0.9401	0.9084
2729	3.63	3.63	62.7	sp|Q5XKP0|QIL1_HUMAN	Protein QIL1 OS=Homo sapiens GN=QIL1 PE=1 SV=1	HUMAN	2	0.8021	1.0606	0.743	0.9086
933	14.35	14.71	52.8	sp|O15372|EIF3H_HUMAN	Eukaryotic translation initiation factor 3 subunit H OS=Homo sapiens GN=EIF3H PE=1 SV=1	HUMAN	13	0.8022	0.9538	0.8467	0.9086
786	16.62	17.2	60.7	sp|Q15833|STXB2_HUMAN	Syntaxin-binding protein 2 OS=Homo sapiens GN=STXBP2 PE=1 SV=2	HUMAN	9	0.8023	0.9179	0.8198	0.9086
4011	0.95	0.98	23.6	sp|O95563|MPC2_HUMAN	Mitochondrial pyruvate carrier 2 OS=Homo sapiens GN=MPC2 PE=1 SV=1	HUMAN	1	0.8024	0.8984	0.5878	0.9087
410	25.49	28.12	67.6	sp|P80303|NUCB2_HUMAN	Nucleobindin-2 OS=Homo sapiens GN=NUCB2 PE=1 SV=2	HUMAN	22	0.8024	0.8808	0.843	0.9087
532	21.43	22.04	51.4	sp|P54578|UBP14_HUMAN	Ubiquitin carboxyl-terminal hydrolase 14 OS=Homo sapiens GN=USP14 PE=1 SV=3	HUMAN	12	0.8024	0.7988	0.9539	0.909
662	18.65	18.78	65.9	sp|P27635|RL10_HUMAN	60S ribosomal protein L10 OS=Homo sapiens GN=RPL10 PE=1 SV=4	HUMAN	17	0.8024	0.9501	0.8112	0.9091
4250	0.37	0.54	45.6	sp|P33981|TTK_HUMAN	Dual specificity protein kinase TTK OS=Homo sapiens GN=TTK PE=1 SV=2	HUMAN	1	0.8027	0.8042	0.7788	0.9091
669	18.55	19.46	45.1	sp|P55036|PSMD4_HUMAN	26S proteasome non-ATPase regulatory subunit 4 OS=Homo sapiens GN=PSMD4 PE=1 SV=1	HUMAN	12	0.8028	0.9233	0.8461	0.9093
675	18.41	18.71	78.2	sp|O43396|TXNL1_HUMAN	Thioredoxin-like protein 1 OS=Homo sapiens GN=TXNL1 PE=1 SV=3	HUMAN	20	0.8028	0.9273	0.8586	0.9094
543	21.21	23.01	64.3	sp|Q9UMS4|PRP19_HUMAN	Pre-mRNA-processing factor 19 OS=Homo sapiens GN=PRPF19 PE=1 SV=1	HUMAN	25	0.8029	1.0135	0.8098	0.9094
2464	4.08	4.13	25.2	sp|Q9ULX6|AKP8L_HUMAN	A-kinase anchor protein 8-like OS=Homo sapiens GN=AKAP8L PE=1 SV=3	HUMAN	3	0.8031	0.898	0.8047	0.9094
872	15.18	16.07	49.5	sp|Q96Q11|TRNT1_HUMAN	CCA tRNA nucleotidyltransferase 1, mitochondrial OS=Homo sapiens GN=TRNT1 PE=1 SV=2	HUMAN	11	0.8031	0.9883	0.8558	0.9095
4448	0.17	0.22	28.3	sp|O95749|GGPPS_HUMAN	Geranylgeranyl pyrophosphate synthase OS=Homo sapiens GN=GGPS1 PE=1 SV=1	HUMAN	0	0.8032	1.0261	0.7154	0.9097
34	87.03	87.32	83.9	sp|P13796|PLSL_HUMAN	Plastin-2 OS=Homo sapiens GN=LCP1 PE=1 SV=6	HUMAN	103	0.8033	0.9873	0.8251	0.9099
693	18.13	18.7	52.3	sp|P15170|ERF3A_HUMAN	Eukaryotic peptide chain release factor GTP-binding subunit ERF3A OS=Homo sapiens GN=GSPT1 PE=1 SV=1	HUMAN	16	0.8035	0.9102	0.8525	0.91
1522	8.52	8.6	45.2	sp|Q14165|MLEC_HUMAN	Malectin OS=Homo sapiens GN=MLEC PE=1 SV=1	HUMAN	5	0.8035	0.9528	0.8556	0.91
3166	2.12	2.6	45.3	sp|P47914|RL29_HUMAN	60S ribosomal protein L29 OS=Homo sapiens GN=RPL29 PE=1 SV=2	HUMAN	3	0.8036	0.9817	0.7904	0.91
3594	2	2.1	42.9	sp|O14530|TXND9_HUMAN	Thioredoxin domain-containing protein 9 OS=Homo sapiens GN=TXNDC9 PE=1 SV=2	HUMAN	1	0.8039	1.0159	0.7437	0.91
3998	1.01	1.03	70	sp|P62312|LSM6_HUMAN	U6 snRNA-associated Sm-like protein LSm6 OS=Homo sapiens GN=LSM6 PE=1 SV=1	HUMAN	2	0.804	0.7458	0.7384	0.9103
1259	10.65	10.75	43.1	sp|P41223|BUD31_HUMAN	Protein BUD31 homolog OS=Homo sapiens GN=BUD31 PE=1 SV=2	HUMAN	7	0.804	0.9076	0.8093	0.9107
684	18.25	19.34	26.6	sp|O43847|NRDC_HUMAN	Nardilysin OS=Homo sapiens GN=NRD1 PE=1 SV=2	HUMAN	14	0.8041	0.8481	0.8777	0.9108
70	66.79	67.42	70.1	sp|P30101|PDIA3_HUMAN	Protein disulfide-isomerase A3 OS=Homo sapiens GN=PDIA3 PE=1 SV=4	HUMAN	68	0.8041	0.9251	0.8536	0.911
1316	10.16	11.33	57.4	sp|O60493|SNX3_HUMAN	Sorting nexin-3 OS=Homo sapiens GN=SNX3 PE=1 SV=3	HUMAN	7	0.8042	0.9088	0.8255	0.911
2367	4.36	4.47	63.6	sp|Q9P016|THYN1_HUMAN	Thymocyte nuclear protein 1 OS=Homo sapiens GN=THYN1 PE=1 SV=1	HUMAN	2	0.8043	0.9958	0.8743	0.9113
623	19.63	20.53	57.7	sp|Q96G03|PGM2_HUMAN	Phosphoglucomutase-2 OS=Homo sapiens GN=PGM2 PE=1 SV=4	HUMAN	12	0.8045	1.0217	0.8385	0.9114
3148	2.15	2.31	30.7	sp|Q9NY93|DDX56_HUMAN	Probable ATP-dependent RNA helicase DDX56 OS=Homo sapiens GN=DDX56 PE=1 SV=1	HUMAN	2	0.8045	0.8021	1.0778	0.9115
2949	2.67	8.44	26.2	sp|Q13555|KCC2G_HUMAN	Calcium/calmodulin-dependent protein kinase type II subunit gamma OS=Homo sapiens GN=CAMK2G PE=1 SV=3	HUMAN	6	0.8046	1.1379	0.7966	0.9116
1715	7.49	7.99	35.9	sp|P36871|PGM1_HUMAN	Phosphoglucomutase-1 OS=Homo sapiens GN=PGM1 PE=1 SV=3	HUMAN	4	0.8048	0.9411	0.7634	0.9117
3805	1.76	1.84	20.2	sp|Q9ULH1|ASAP1_HUMAN	Arf-GAP with SH3 domain, ANK repeat and PH domain-containing protein 1 OS=Homo sapiens GN=ASAP1 PE=1 SV=4	HUMAN	3	0.8049	1.1263	0.7896	0.9117
457	23.68	32.84	60	sp|P52597|HNRPF_HUMAN	Heterogeneous nuclear ribonucleoprotein F OS=Homo sapiens GN=HNRNPF PE=1 SV=3	HUMAN	38	0.805	0.9793	0.8564	0.9118
46	80.39	82.78	74.8	sp|P55072|TERA_HUMAN	Transitional endoplasmic reticulum ATPase OS=Homo sapiens GN=VCP PE=1 SV=4	HUMAN	78	0.8053	0.944	0.8123	0.9119
1178	11.48	11.7	28.2	sp|Q15154|PCM1_HUMAN	Pericentriolar material 1 protein OS=Homo sapiens GN=PCM1 PE=1 SV=4	HUMAN	7	0.8053	1.0487	0.747	0.9119
2365	4.36	4.6	26.9	sp|Q14139|UBE4A_HUMAN	Ubiquitin conjugation factor E4 A OS=Homo sapiens GN=UBE4A PE=1 SV=2	HUMAN	2	0.8053	1.0867	0.8267	0.9119
2456	4.09	4.48	34.1	sp|Q13427|PPIG_HUMAN	Peptidyl-prolyl cis-trans isomerase G OS=Homo sapiens GN=PPIG PE=1 SV=2	HUMAN	2	0.8053	0.9696	0.9583	0.912
3389	2.01	2.29	27.2	sp|Q5VSL9|FA40A_HUMAN	Protein FAM40A OS=Homo sapiens GN=FAM40A PE=1 SV=1	HUMAN	1	0.8054	0.8346	0.8269	0.9123
4318	0.28	0.54	36	sp|O14578|CTRO_HUMAN	Citron Rho-interacting kinase OS=Homo sapiens GN=CIT PE=1 SV=2	HUMAN	1	0.8054	0.7847	1.0015	0.9124
888	14.92	15.17	63.1	sp|Q8WXX5|DNJC9_HUMAN	DnaJ homolog subfamily C member 9 OS=Homo sapiens GN=DNAJC9 PE=1 SV=1	HUMAN	10	0.8054	1.0511	0.7983	0.9125
911	14.66	14.89	43.1	sp|Q9UBC2|EP15R_HUMAN	Epidermal growth factor receptor substrate 15-like 1 OS=Homo sapiens GN=EPS15L1 PE=1 SV=1	HUMAN	8	0.8056	0.9268	0.8609	0.9127
4230	0.4	0.58	19.9	sp|Q9NPB8|GPCP1_HUMAN	Glycerophosphocholine phosphodiesterase GPCPD1 OS=Homo sapiens GN=GPCPD1 PE=1 SV=2	HUMAN	1	0.8056	1.2402	1.3419	0.9127
2498	4.04	4.15	41.9	sp|P01730|CD4_HUMAN	T-cell surface glycoprotein CD4 OS=Homo sapiens GN=CD4 PE=1 SV=1	HUMAN	2	0.8058	0.7194	0.989	0.9129
3124	2.19	2.31	28.7	sp|Q9UBU8|MO4L1_HUMAN	Mortality factor 4-like protein 1 OS=Homo sapiens GN=MORF4L1 PE=1 SV=2	HUMAN	4	0.8059	0.7645	0.9285	0.9129
1949	6.11	6.35	36.6	sp|Q9GZZ9|UBA5_HUMAN	Ubiquitin-like modifier-activating enzyme 5 OS=Homo sapiens GN=UBA5 PE=1 SV=1	HUMAN	4	0.8059	0.9957	0.9733	0.9133
1450	9.12	11.24	25.8	sp|Q9NT62|ATG3_HUMAN	Ubiquitin-like-conjugating enzyme ATG3 OS=Homo sapiens GN=ATG3 PE=1 SV=1	HUMAN	9	0.8061	0.9609	0.7634	0.9134
1015	13.39	13.46	51.4	sp|Q99961|SH3G1_HUMAN	Endophilin-A2 OS=Homo sapiens GN=SH3GL1 PE=1 SV=1	HUMAN	8	0.8062	0.9046	0.8054	0.9134
841	15.6	17.86	54.2	sp|O43395|PRPF3_HUMAN	U4/U6 small nuclear ribonucleoprotein Prp3 OS=Homo sapiens GN=PRPF3 PE=1 SV=2	HUMAN	12	0.8062	0.9674	0.8837	0.9135
743	17.32	17.94	55.7	sp|O75306|NDUS2_HUMAN	NADH dehydrogenase [ubiquinone] iron-sulfur protein 2, mitochondrial OS=Homo sapiens GN=NDUFS2 PE=1 SV=2	HUMAN	10	0.8063	0.9331	0.8918	0.9136
276	33.44	33.65	69.1	sp|Q9UHX1|PUF60_HUMAN	Poly(U)-binding-splicing factor PUF60 OS=Homo sapiens GN=PUF60 PE=1 SV=1	HUMAN	31	0.8064	0.9249	0.8652	0.9136
133	49.15	51.28	69.9	sp|P48735|IDHP_HUMAN	Isocitrate dehydrogenase [NADP], mitochondrial OS=Homo sapiens GN=IDH2 PE=1 SV=2	HUMAN	46	0.8065	0.9397	0.8218	0.9136
2720	3.68	3.72	20.4	sp|Q9NWQ8|PHAG1_HUMAN	Phosphoprotein associated with glycosphingolipid-enriched microdomains 1 OS=Homo sapiens GN=PAG1 PE=1 SV=2	HUMAN	2	0.8066	0.8299	0.924	0.9138
546	21.2	21.33	67.9	sp|P30041|PRDX6_HUMAN	Peroxiredoxin-6 OS=Homo sapiens GN=PRDX6 PE=1 SV=3	HUMAN	23	0.8066	0.965	0.8515	0.914
254	35.82	39.36	77.8	sp|P32119|PRDX2_HUMAN	Peroxiredoxin-2 OS=Homo sapiens GN=PRDX2 PE=1 SV=5	HUMAN	28	0.8066	0.9899	0.8666	0.9141
3044	2.37	2.55	29.9	sp|Q14376|GALE_HUMAN	UDP-glucose 4-epimerase OS=Homo sapiens GN=GALE PE=1 SV=2	HUMAN	2	0.8067	0.9625	0.7442	0.9142
1003	13.53	14.8	38.6	sp|P07858|CATB_HUMAN	Cathepsin B OS=Homo sapiens GN=CTSB PE=1 SV=3	HUMAN	9	0.8067	0.914	0.8008	0.9143
1567	8.24	14.57	50.6	sp|Q92769|HDAC2_HUMAN	Histone deacetylase 2 OS=Homo sapiens GN=HDAC2 PE=1 SV=2	HUMAN	15	0.8067	0.8917	0.9471	0.9144
3024	2.43	2.56	48.8	sp|O96017|CHK2_HUMAN	Serine/threonine-protein kinase Chk2 OS=Homo sapiens GN=CHEK2 PE=1 SV=1	HUMAN	2	0.8068	0.8417	0.8267	0.9144
2075	5.93	6.61	28.7	sp|Q15057|ACAP2_HUMAN	Arf-GAP with coiled-coil, ANK repeat and PH domain-containing protein 2 OS=Homo sapiens GN=ACAP2 PE=1 SV=3	HUMAN	3	0.8069	1.0769	0.8558	0.9144
272	33.64	34.1	67.8	sp|P22695|QCR2_HUMAN	Cytochrome b-c1 complex subunit 2, mitochondrial OS=Homo sapiens GN=UQCRC2 PE=1 SV=3	HUMAN	35	0.807	0.9571	0.8585	0.9146
2745	3.56	3.92	15.5	sp|Q96RS0|TGS1_HUMAN	Trimethylguanosine synthase OS=Homo sapiens GN=TGS1 PE=1 SV=3	HUMAN	2	0.8072	1.4697	1.3935	0.9148
4309	0.29	0.39	26.3	sp|Q86UA1|PRP39_HUMAN	Pre-mRNA-processing factor 39 OS=Homo sapiens GN=PRPF39 PE=1 SV=3	HUMAN	0	0.8073	0.9271	0.9323	0.9148
1385	9.74	10.52	40.9	sp|Q13190|STX5_HUMAN	Syntaxin-5 OS=Homo sapiens GN=STX5 PE=1 SV=2	HUMAN	5	0.8075	1.0792	0.6758	0.9149
1038	13.11	13.72	58.1	sp|O00487|PSDE_HUMAN	26S proteasome non-ATPase regulatory subunit 14 OS=Homo sapiens GN=PSMD14 PE=1 SV=1	HUMAN	9	0.8075	1.1012	0.785	0.9151
1730	7.35	8.1	45.9	sp|Q13492|PICAL_HUMAN	Phosphatidylinositol-binding clathrin assembly protein OS=Homo sapiens GN=PICALM PE=1 SV=2	HUMAN	6	0.8077	1.0301	0.6894	0.9152
587	20.31	20.71	55.3	sp|Q99615|DNJC7_HUMAN	DnaJ homolog subfamily C member 7 OS=Homo sapiens GN=DNAJC7 PE=1 SV=2	HUMAN	14	0.8077	1.0171	0.8624	0.9152
4286	0.32	0.4	16.8	sp|Q9BUE0|MED18_HUMAN	Mediator of RNA polymerase II transcription subunit 18 OS=Homo sapiens GN=MED18 PE=1 SV=1	HUMAN	1	0.8077	1.352	1.0019	0.9152
160	45.12	45.67	62.7	sp|Q15046|SYK_HUMAN	Lysine--tRNA ligase OS=Homo sapiens GN=KARS PE=1 SV=3	HUMAN	35	0.8078	0.9682	0.839	0.9153
513	21.95	22.64	67.3	sp|Q9Y617|SERC_HUMAN	Phosphoserine aminotransferase OS=Homo sapiens GN=PSAT1 PE=1 SV=2	HUMAN	19	0.8079	0.953	0.8254	0.9153
741	17.34	18.25	74.8	sp|P53999|TCP4_HUMAN	Activated RNA polymerase II transcriptional coactivator p15 OS=Homo sapiens GN=SUB1 PE=1 SV=3	HUMAN	23	0.808	1.0412	0.8189	0.9153
391	26.25	32.33	73.6	sp|O14979|HNRDL_HUMAN	Heterogeneous nuclear ribonucleoprotein D-like OS=Homo sapiens GN=HNRPDL PE=1 SV=3	HUMAN	26	0.8082	1.0729	0.8168	0.9155
2228	5.06	5.12	28.4	sp|Q7L591|DOK3_HUMAN	Docking protein 3 OS=Homo sapiens GN=DOK3 PE=1 SV=2	HUMAN	3	0.8084	1.0425	0.6731	0.9155
1364	9.92	9.92	83.5	sp|Q9GZT3|SLIRP_HUMAN	SRA stem-loop-interacting RNA-binding protein, mitochondrial OS=Homo sapiens GN=SLIRP PE=1 SV=1	HUMAN	6	0.8084	1.0223	0.8086	0.9155
1270	10.55	11.16	69.4	sp|P18859|ATP5J_HUMAN	ATP synthase-coupling factor 6, mitochondrial OS=Homo sapiens GN=ATP5J PE=1 SV=1	HUMAN	7	0.8084	1.0532	0.7917	0.9158
1328	10.1	10.48	38.8	sp|P23634|AT2B4_HUMAN	Plasma membrane calcium-transporting ATPase 4 OS=Homo sapiens GN=ATP2B4 PE=1 SV=2	HUMAN	7	0.8084	1.0389	0.896	0.9158
1061	12.81	13.75	62.2	sp|P60866|RS20_HUMAN	40S ribosomal protein S20 OS=Homo sapiens GN=RPS20 PE=1 SV=1	HUMAN	7	0.8087	1.0306	0.8552	0.9158
3130	2.18	2.25	51.4	sp|P31949|S10AB_HUMAN	Protein S100-A11 OS=Homo sapiens GN=S100A11 PE=1 SV=2	HUMAN	2	0.8087	1.0472	0.8601	0.9159
1918	6.2	6.67	30.7	sp|Q12769|NU160_HUMAN	Nuclear pore complex protein Nup160 OS=Homo sapiens GN=NUP160 PE=1 SV=3	HUMAN	5	0.8087	1.0686	0.9145	0.9161
17	110.5	111.19	91.3	sp|P26038|MOES_HUMAN	Moesin OS=Homo sapiens GN=MSN PE=1 SV=3	HUMAN	130	0.8088	0.9644	0.8491	0.9162
2566	4.01	4.02	31.5	sp|O95825|QORL1_HUMAN	Quinone oxidoreductase-like protein 1 OS=Homo sapiens GN=CRYZL1 PE=1 SV=2	HUMAN	2	0.8088	1.2321	0.7617	0.9165
219	38.84	39.14	84.5	sp|P62081|RS7_HUMAN	40S ribosomal protein S7 OS=Homo sapiens GN=RPS7 PE=1 SV=1	HUMAN	28	0.8089	0.9191	0.9085	0.9165
1337	10.04	10.52	52.9	sp|P13995|MTDC_HUMAN	Bifunctional methylenetetrahydrofolate dehydrogenase/cyclohydrolase, mitochondrial OS=Homo sapiens GN=MTHFD2 PE=1 SV=2	HUMAN	8	0.8093	0.8691	0.922	0.9166
966	14	14.08	31.7	sp|O75131|CPNE3_HUMAN	Copine-3 OS=Homo sapiens GN=CPNE3 PE=1 SV=1	HUMAN	9	0.8093	0.9598	0.8507	0.9166
1393	9.67	10.18	57.8	sp|Q13405|RM49_HUMAN	39S ribosomal protein L49, mitochondrial OS=Homo sapiens GN=MRPL49 PE=1 SV=1	HUMAN	6	0.8094	0.9779	0.9951	0.9167
851	15.47	15.8	67	sp|P50914|RL14_HUMAN	60S ribosomal protein L14 OS=Homo sapiens GN=RPL14 PE=1 SV=4	HUMAN	16	0.8097	0.8949	0.8838	0.9168
4760	0.07	0.32	45.2	sp|Q9P2W1|HOP2_HUMAN	Homologous-pairing protein 2 homolog OS=Homo sapiens GN=PSMC3IP PE=1 SV=1	HUMAN	0	0.8097	0.9831	0.8826	0.9168
1904	6.27	6.36	29.2	sp|Q99816|TS101_HUMAN	Tumor susceptibility gene 101 protein OS=Homo sapiens GN=TSG101 PE=1 SV=2	HUMAN	4	0.8099	0.9023	0.7523	0.9169
3307	2.02	2.31	42.4	sp|Q9Y3A5|SBDS_HUMAN	Ribosome maturation protein SBDS OS=Homo sapiens GN=SBDS PE=1 SV=4	HUMAN	1	0.8099	0.9954	1.0177	0.917
2896	2.9	3.05	18.6	sp|Q8TDJ6|DMXL2_HUMAN	DmX-like protein 2 OS=Homo sapiens GN=DMXL2 PE=1 SV=2	HUMAN	2	0.81	0.9149	0.7769	0.9171
713	17.86	17.89	61.3	sp|Q15185|TEBP_HUMAN	Prostaglandin E synthase 3 OS=Homo sapiens GN=PTGES3 PE=1 SV=1	HUMAN	18	0.81	0.9487	0.8781	0.9171
4670	0.09	0.23	20	sp|P35354|PGH2_HUMAN	Prostaglandin G/H synthase 2 OS=Homo sapiens GN=PTGS2 PE=1 SV=2	HUMAN	0	0.81	0.8675	1.2424	0.9172
3991	1.02	1.06	16.2	sp|O75362|ZN217_HUMAN	Zinc finger protein 217 OS=Homo sapiens GN=ZNF217 PE=1 SV=1	HUMAN	1	0.8101	0.5297	1.025	0.9173
120	51.9	52.47	77.1	sp|Q02790|FKBP4_HUMAN	Peptidyl-prolyl cis-trans isomerase FKBP4 OS=Homo sapiens GN=FKBP4 PE=1 SV=3	HUMAN	34	0.8101	0.9923	0.8511	0.9173
750	17.22	19.42	46.9	sp|Q9H3U1|UN45A_HUMAN	Protein unc-45 homolog A OS=Homo sapiens GN=UNC45A PE=1 SV=1	HUMAN	10	0.8103	0.956	0.9	0.9174
241	36.64	46.13	77.3	sp|P07195|LDHB_HUMAN	L-lactate dehydrogenase B chain OS=Homo sapiens GN=LDHB PE=1 SV=2	HUMAN	41	0.8103	1.0101	0.8982	0.9175
273	33.59	33.83	70.5	sp|Q16851|UGPA_HUMAN	UTP--glucose-1-phosphate uridylyltransferase OS=Homo sapiens GN=UGP2 PE=1 SV=5	HUMAN	21	0.8104	1.0212	0.7909	0.9177
3888	1.44	1.84	19.1	sp|Q7Z3C6|ATG9A_HUMAN	Autophagy-related protein 9A OS=Homo sapiens GN=ATG9A PE=1 SV=3	HUMAN	1	0.8105	1.2773	0.507	0.9177
1778	7	7.17	34.1	sp|Q7Z5K2|WAPL_HUMAN	Wings apart-like protein homolog OS=Homo sapiens GN=WAPAL PE=1 SV=1	HUMAN	6	0.8106	1.0081	0.8307	0.9177
1922	6.2	6.23	69.8	sp|Q9NP97|DLRB1_HUMAN	Dynein light chain roadblock-type 1 OS=Homo sapiens GN=DYNLRB1 PE=1 SV=3	HUMAN	7	0.8107	0.8499	0.8474	0.9177
1607	8.04	8.36	31.9	sp|O14976|GAK_HUMAN	Cyclin-G-associated kinase OS=Homo sapiens GN=GAK PE=1 SV=2	HUMAN	7	0.8107	0.9758	0.9269	0.9179
1314	10.18	10.27	71.7	sp|P61513|RL37A_HUMAN	60S ribosomal protein L37a OS=Homo sapiens GN=RPL37A PE=1 SV=2	HUMAN	15	0.8107	1.0981	0.8438	0.9181
748	17.26	18.13	61.6	sp|O15143|ARC1B_HUMAN	Actin-related protein 2/3 complex subunit 1B OS=Homo sapiens GN=ARPC1B PE=1 SV=3	HUMAN	23	0.8108	0.9488	0.9151	0.9182
1906	6.26	6.43	46.3	sp|Q6UXN9|WDR82_HUMAN	WD repeat-containing protein 82 OS=Homo sapiens GN=WDR82 PE=1 SV=1	HUMAN	3	0.8108	0.9521	0.9322	0.9184
439	24.43	26.29	50	sp|Q14258|TRI25_HUMAN	E3 ubiquitin/ISG15 ligase TRIM25 OS=Homo sapiens GN=TRIM25 PE=1 SV=2	HUMAN	16	0.8109	0.9073	0.8861	0.9185
3590	2	2.11	20.1	sp|Q9NRP0|OSTC_HUMAN	Oligosaccharyltransferase complex subunit OSTC OS=Homo sapiens GN=OSTC PE=1 SV=1	HUMAN	1	0.811	1.2403	0.7091	0.9186
383	26.53	26.73	83.1	sp|P68431|H31_HUMAN	Histone H3.1 OS=Homo sapiens GN=HIST1H3A PE=1 SV=2	HUMAN	20	0.8111	0.9825	0.8645	0.9189
44	82.06	90.39	69.5	sp|P14625|ENPL_HUMAN	Endoplasmin OS=Homo sapiens GN=HSP90B1 PE=1 SV=1	HUMAN	96	0.8112	0.9961	0.8379	0.9189
3724	2	2.01	16.9	sp|Q9UDX5|MTFP1_HUMAN	Mitochondrial fission process protein 1 OS=Homo sapiens GN=MTFP1 PE=1 SV=1	HUMAN	1	0.8112	1.0686	0.8059	0.9191
602	19.96	20.13	66	sp|Q99439|CNN2_HUMAN	Calponin-2 OS=Homo sapiens GN=CNN2 PE=1 SV=4	HUMAN	14	0.8114	0.9148	0.8129	0.9193
290	31.75	33.47	72.6	sp|P61160|ARP2_HUMAN	Actin-related protein 2 OS=Homo sapiens GN=ACTR2 PE=1 SV=1	HUMAN	33	0.8114	0.9697	0.8279	0.9195
1813	6.8	7.71	44.3	sp|P08397|HEM3_HUMAN	Porphobilinogen deaminase OS=Homo sapiens GN=HMBS PE=1 SV=2	HUMAN	4	0.8114	1.0492	1.101	0.9195
451	24.08	24.74	75	sp|P62241|RS8_HUMAN	40S ribosomal protein S8 OS=Homo sapiens GN=RPS8 PE=1 SV=2	HUMAN	35	0.8115	0.9332	0.9049	0.9195
1654	7.91	7.95	44.1	sp|Q16762|THTR_HUMAN	Thiosulfate sulfurtransferase OS=Homo sapiens GN=TST PE=1 SV=4	HUMAN	6	0.8116	0.8109	0.8652	0.9195
2024	6.01	6.09	64.9	sp|Q9UK76|HN1_HUMAN	Hematological and neurological expressed 1 protein OS=Homo sapiens GN=HN1 PE=1 SV=3	HUMAN	9	0.8116	0.8673	0.8857	0.9197
704	18.01	18.9	59.9	sp|O75792|RNH2A_HUMAN	Ribonuclease H2 subunit A OS=Homo sapiens GN=RNASEH2A PE=1 SV=2	HUMAN	10	0.8116	0.9441	0.8821	0.9198
282	32.65	32.72	86.7	sp|P51858|HDGF_HUMAN	Hepatoma-derived growth factor OS=Homo sapiens GN=HDGF PE=1 SV=1	HUMAN	25	0.8117	1.0694	0.8904	0.92
1467	8.97	9.72	59.8	sp|P35270|SPRE_HUMAN	Sepiapterin reductase OS=Homo sapiens GN=SPR PE=1 SV=1	HUMAN	6	0.8118	0.8312	1.0025	0.9201
2347	4.45	4.47	55.1	sp|Q8N5N7|RM50_HUMAN	39S ribosomal protein L50, mitochondrial OS=Homo sapiens GN=MRPL50 PE=1 SV=2	HUMAN	3	0.8118	0.9408	0.9305	0.9201
3971	1.09	1.11	24.8	sp|O43818|U3IP2_HUMAN	U3 small nucleolar RNA-interacting protein 2 OS=Homo sapiens GN=RRP9 PE=1 SV=1	HUMAN	1	0.812	0.987	1.0153	0.9203
1106	12.3	13.18	38	sp|Q8WYP5|ELYS_HUMAN	Protein ELYS OS=Homo sapiens GN=AHCTF1 PE=1 SV=3	HUMAN	7	0.8121	1.0559	0.7644	0.9204
402	25.87	25.87	58.9	sp|P60900|PSA6_HUMAN	Proteasome subunit alpha type-6 OS=Homo sapiens GN=PSMA6 PE=1 SV=1	HUMAN	21	0.8121	0.9891	0.8625	0.9207
3287	2.03	2.11	26.2	sp|Q9HC07|TM165_HUMAN	Transmembrane protein 165 OS=Homo sapiens GN=TMEM165 PE=1 SV=1	HUMAN	1	0.8122	0.6511	0.9925	0.9207
247	36.29	37.56	69.9	sp|P11413|G6PD_HUMAN	Glucose-6-phosphate 1-dehydrogenase OS=Homo sapiens GN=G6PD PE=1 SV=4	HUMAN	31	0.8122	0.966	0.8701	0.9207
810	16.21	16.8	45.5	sp|Q9BV20|MTNA_HUMAN	Methylthioribose-1-phosphate isomerase OS=Homo sapiens GN=MRI1 PE=1 SV=1	HUMAN	10	0.8122	0.9856	0.8674	0.921
1852	6.53	6.96	33	sp|Q92766|RREB1_HUMAN	Ras-responsive element-binding protein 1 OS=Homo sapiens GN=RREB1 PE=1 SV=3	HUMAN	5	0.8122	1.0014	0.8998	0.9213
2652	4	4	54.9	sp|Q8N983|RM43_HUMAN	39S ribosomal protein L43, mitochondrial OS=Homo sapiens GN=MRPL43 PE=1 SV=1	HUMAN	2	0.8122	1.0484	0.8395	0.9214
1048	12.97	14.38	38.1	sp|P23921|RIR1_HUMAN	Ribonucleoside-diphosphate reductase large subunit OS=Homo sapiens GN=RRM1 PE=1 SV=1	HUMAN	9	0.8123	0.8571	0.8297	0.9214
995	13.6	14.32	30.3	sp|O95163|ELP1_HUMAN	Elongator complex protein 1 OS=Homo sapiens GN=IKBKAP PE=1 SV=3	HUMAN	12	0.8124	0.9172	0.8368	0.9214
556	21.01	22.64	83.3	sp|P32969|RL9_HUMAN	60S ribosomal protein L9 OS=Homo sapiens GN=RPL9 PE=1 SV=1	HUMAN	15	0.8124	1.0101	0.86	0.9214
1978	6.06	6.06	28.1	sp|Q15427|SF3B4_HUMAN	Splicing factor 3B subunit 4 OS=Homo sapiens GN=SF3B4 PE=1 SV=1	HUMAN	5	0.8125	1.0791	0.8067	0.9215
3745	2	2	41.5	sp|Q5J8M3|EMC4_HUMAN	ER membrane protein complex subunit 4 OS=Homo sapiens GN=EMC4 PE=1 SV=2	HUMAN	1	0.8127	0.6143	0.9814	0.9216
348	27.92	28.07	100	sp|P05387|RLA2_HUMAN	60S acidic ribosomal protein P2 OS=Homo sapiens GN=RPLP2 PE=1 SV=1	HUMAN	42	0.8127	0.9421	0.7957	0.9219
174	43.18	43.41	49.1	sp|P35637|FUS_HUMAN	RNA-binding protein FUS OS=Homo sapiens GN=FUS PE=1 SV=1	HUMAN	35	0.8127	0.967	0.8434	0.922
3858	1.54	4.16	19	sp|P07947|YES_HUMAN	Tyrosine-protein kinase Yes OS=Homo sapiens GN=YES1 PE=1 SV=3	HUMAN	3	0.8129	0.6295	0.76	0.9223
2328	4.53	4.73	25	sp|Q9NUQ2|PLCE_HUMAN	1-acyl-sn-glycerol-3-phosphate acyltransferase epsilon OS=Homo sapiens GN=AGPAT5 PE=1 SV=3	HUMAN	4	0.813	0.8874	0.9075	0.9223
3195	2.09	2.09	50.3	sp|Q9NX14|NDUBB_HUMAN	NADH dehydrogenase [ubiquinone] 1 beta subcomplex subunit 11, mitochondrial OS=Homo sapiens GN=NDUFB11 PE=1 SV=1	HUMAN	1	0.8131	0.6597	1.2256	0.9223
327	29.03	29.14	85.7	sp|P63241|IF5A1_HUMAN	Eukaryotic translation initiation factor 5A-1 OS=Homo sapiens GN=EIF5A PE=1 SV=2	HUMAN	30	0.8131	0.9813	0.866	0.9225
526	21.63	25.35	46.8	sp|O60763|USO1_HUMAN	General vesicular transport factor p115 OS=Homo sapiens GN=USO1 PE=1 SV=2	HUMAN	16	0.8131	0.9561	0.8928	0.9229
4732	0.08	0.1	26.9	RRRRRsp|A6NHJ4|ZN860_HUMAN	REVERSED Zinc finger protein 860 OS=Homo sapiens GN=ZNF860 PE=2 SV=3	HUMAN	0	0.8131	0.7964	1.1368	0.9229
1496	8.75	9.01	46.7	sp|Q15208|STK38_HUMAN	Serine/threonine-protein kinase 38 OS=Homo sapiens GN=STK38 PE=1 SV=1	HUMAN	6	0.8131	0.9746	1.0773	0.923
3330	2.02	2.06	24.2	sp|Q8WVC0|LEO1_HUMAN	RNA polymerase-associated protein LEO1 OS=Homo sapiens GN=LEO1 PE=1 SV=1	HUMAN	2	0.8134	1.1069	0.695	0.923
1013	13.41	13.76	37.4	sp|Q96JJ7|TMX3_HUMAN	Protein disulfide-isomerase TMX3 OS=Homo sapiens GN=TMX3 PE=1 SV=2	HUMAN	7	0.8135	0.8605	0.9443	0.9231
3455	2.01	2.02	24.7	sp|O00483|NDUA4_HUMAN	NADH dehydrogenase [ubiquinone] 1 alpha subcomplex subunit 4 OS=Homo sapiens GN=NDUFA4 PE=1 SV=1	HUMAN	3	0.8136	1.0001	0.8196	0.9235
2093	5.83	5.92	39.7	sp|Q7Z6E9|RBBP6_HUMAN	E3 ubiquitin-protein ligase RBBP6 OS=Homo sapiens GN=RBBP6 PE=1 SV=1	HUMAN	4	0.8136	0.9704	0.9142	0.9237
1218	11.08	11.62	82.5	sp|P68036|UB2L3_HUMAN	Ubiquitin-conjugating enzyme E2 L3 OS=Homo sapiens GN=UBE2L3 PE=1 SV=1	HUMAN	15	0.8137	0.9525	0.7879	0.9241
1661	7.87	8.46	36.3	sp|P10155|RO60_HUMAN	60 kDa SS-A/Ro ribonucleoprotein OS=Homo sapiens GN=TROVE2 PE=1 SV=2	HUMAN	4	0.814	0.9615	0.8234	0.9241
4051	0.83	2.18	34.3	sp|Q9Y6W3|CAN7_HUMAN	Calpain-7 OS=Homo sapiens GN=CAPN7 PE=1 SV=1	HUMAN	2	0.814	0.8663	1.1137	0.9242
604	19.92	22.02	59.3	sp|Q9NTK5|OLA1_HUMAN	Obg-like ATPase 1 OS=Homo sapiens GN=OLA1 PE=1 SV=2	HUMAN	13	0.8141	1.0292	0.8082	0.9244
1983	6.05	6.24	23.2	sp|Q9UHY1|NRBP_HUMAN	Nuclear receptor-binding protein OS=Homo sapiens GN=NRBP1 PE=1 SV=1	HUMAN	3	0.8142	0.8382	0.7707	0.9245
2205	5.19	5.29	21.4	sp|Q9NR09|BIRC6_HUMAN	Baculoviral IAP repeat-containing protein 6 OS=Homo sapiens GN=BIRC6 PE=1 SV=2	HUMAN	4	0.8142	0.8684	0.9805	0.9246
4008	0.97	1.02	30.2	sp|Q8N2K0|ABD12_HUMAN	Monoacylglycerol lipase ABHD12 OS=Homo sapiens GN=ABHD12 PE=2 SV=2	HUMAN	2	0.8143	1.107	0.6379	0.9247
3840	1.63	1.81	35.5	sp|P29597|TYK2_HUMAN	Non-receptor tyrosine-protein kinase TYK2 OS=Homo sapiens GN=TYK2 PE=1 SV=3	HUMAN	1	0.8143	0.8073	1.0017	0.9247
1171	11.56	11.73	38.8	sp|P49903|SPS1_HUMAN	Selenide, water dikinase 1 OS=Homo sapiens GN=SEPHS1 PE=1 SV=2	HUMAN	7	0.8143	1.0229	0.8784	0.9248
4142	0.58	1.17	46.3	sp|P06746|DPOLB_HUMAN	DNA polymerase beta OS=Homo sapiens GN=POLB PE=1 SV=3	HUMAN	1	0.8143	1.4288	0.7592	0.9248
78	63.79	63.86	84.3	sp|P50395|GDIB_HUMAN	Rab GDP dissociation inhibitor beta OS=Homo sapiens GN=GDI2 PE=1 SV=2	HUMAN	58	0.8144	0.9888	0.8544	0.9252
3908	1.36	1.37	33.3	sp|Q9UGY1|NOL12_HUMAN	Nucleolar protein 12 OS=Homo sapiens GN=NOL12 PE=1 SV=1	HUMAN	1	0.8145	1.3102	0.7438	0.9252
1459	9.04	13.28	36.9	sp|Q01844|EWS_HUMAN	RNA-binding protein EWS OS=Homo sapiens GN=EWSR1 PE=1 SV=1	HUMAN	15	0.8146	0.9194	0.878	0.9254
2707	3.73	4.68	47.4	sp|Q9Y5K6|CD2AP_HUMAN	CD2-associated protein OS=Homo sapiens GN=CD2AP PE=1 SV=1	HUMAN	4	0.8147	0.7809	0.9287	0.9255
4238	0.39	0.58	22.4	sp|Q9UEE9|CFDP1_HUMAN	Craniofacial development protein 1 OS=Homo sapiens GN=CFDP1 PE=1 SV=1	HUMAN	0	0.8147	0.9615	0.7425	0.9257
1175	11.5	11.65	20.5	sp|P11717|MPRI_HUMAN	Cation-independent mannose-6-phosphate receptor OS=Homo sapiens GN=IGF2R PE=1 SV=3	HUMAN	8	0.8147	0.9345	0.8438	0.9266
827	15.91	16.19	51.1	sp|Q9BT09|CNPY3_HUMAN	Protein canopy homolog 3 OS=Homo sapiens GN=CNPY3 PE=1 SV=1	HUMAN	10	0.8147	0.973	0.8288	0.9267
1019	13.35	15.7	41.2	sp|P50452|SPB8_HUMAN	Serpin B8 OS=Homo sapiens GN=SERPINB8 PE=1 SV=2	HUMAN	12	0.8147	0.9712	0.8419	0.9267
115	52.73	53.13	87.9	sp|P67936|TPM4_HUMAN	Tropomyosin alpha-4 chain OS=Homo sapiens GN=TPM4 PE=1 SV=3	HUMAN	37	0.8147	1.056	0.8399	0.9267
315	29.84	31.63	82.4	sp|P12004|PCNA_HUMAN	Proliferating cell nuclear antigen OS=Homo sapiens GN=PCNA PE=1 SV=1	HUMAN	38	0.8148	0.9577	0.8531	0.9269
539	21.26	21.31	64	sp|Q15181|IPYR_HUMAN	Inorganic pyrophosphatase OS=Homo sapiens GN=PPA1 PE=1 SV=2	HUMAN	22	0.8149	0.9553	0.8433	0.927
331	28.93	29.95	67.4	sp|P40925|MDHC_HUMAN	Malate dehydrogenase, cytoplasmic OS=Homo sapiens GN=MDH1 PE=1 SV=4	HUMAN	27	0.8149	1.056	0.8339	0.9271
2256	4.91	5.25	33.7	sp|P38432|COIL_HUMAN	Coilin OS=Homo sapiens GN=COIL PE=1 SV=1	HUMAN	4	0.815	0.8462	0.7983	0.9272
2325	4.54	4.7	29.7	sp|Q9BZE9|ASPC1_HUMAN	Tether containing UBX domain for GLUT4 OS=Homo sapiens GN=ASPSCR1 PE=1 SV=1	HUMAN	2	0.815	0.9212	0.7674	0.9275
855	15.41	16.3	42.9	sp|Q9UPN3|MACF1_HUMAN	Microtubule-actin cross-linking factor 1, isoforms 1/2/3/5 OS=Homo sapiens GN=MACF1 PE=1 SV=4	HUMAN	23	0.815	0.914	0.849	0.9275
3463	2	12.39	50.9	sp|P30154|2AAB_HUMAN	Serine/threonine-protein phosphatase 2A 65 kDa regulatory subunit A beta isoform OS=Homo sapiens GN=PPP2R1B PE=1 SV=3	HUMAN	11	0.815	0.9579	0.915	0.9278
1628	8	8.38	21.4	sp|Q13685|AAMP_HUMAN	Angio-associated migratory cell protein OS=Homo sapiens GN=AAMP PE=1 SV=2	HUMAN	4	0.8151	0.9118	0.7688	0.928
570	20.51	21.81	74.6	sp|Q15691|MARE1_HUMAN	Microtubule-associated protein RP/EB family member 1 OS=Homo sapiens GN=MAPRE1 PE=1 SV=3	HUMAN	17	0.8151	0.9607	0.7889	0.9281
521	21.73	22.07	24.8	sp|P18583|SON_HUMAN	Protein SON OS=Homo sapiens GN=SON PE=1 SV=4	HUMAN	17	0.8151	0.9771	0.802	0.9282
3775	1.86	2.84	37	sp|Q9H7D0|DOCK5_HUMAN	Dedicator of cytokinesis protein 5 OS=Homo sapiens GN=DOCK5 PE=1 SV=3	HUMAN	2	0.8152	0.9742	0.6555	0.9284
1539	8.4	8.97	28.4	sp|Q12888|TP53B_HUMAN	Tumor suppressor p53-binding protein 1 OS=Homo sapiens GN=TP53BP1 PE=1 SV=2	HUMAN	6	0.8152	0.9884	0.785	0.9284
962	14.02	14.16	36.4	sp|Q10713|MPPA_HUMAN	Mitochondrial-processing peptidase subunit alpha OS=Homo sapiens GN=PMPCA PE=1 SV=2	HUMAN	9	0.8152	0.9094	0.8755	0.9285
2052	6	6.05	61	sp|P62861|RS30_HUMAN	40S ribosomal protein S30 OS=Homo sapiens GN=FAU PE=1 SV=1	HUMAN	3	0.8153	0.9495	0.8785	0.9286
742	17.32	18.55	43.7	sp|Q13596|SNX1_HUMAN	Sorting nexin-1 OS=Homo sapiens GN=SNX1 PE=1 SV=3	HUMAN	12	0.8154	0.929	0.7998	0.9287
169	43.62	44.31	65.8	sp|Q9Y3Z3|SAMH1_HUMAN	SAM domain and HD domain-containing protein 1 OS=Homo sapiens GN=SAMHD1 PE=1 SV=2	HUMAN	32	0.8154	0.9706	0.879	0.9288
108	54.96	55.7	66.3	sp|P29401|TKT_HUMAN	Transketolase OS=Homo sapiens GN=TKT PE=1 SV=3	HUMAN	59	0.8155	0.988	0.8912	0.9288
440	24.42	25.23	90.2	sp|P61604|CH10_HUMAN	10 kDa heat shock protein, mitochondrial OS=Homo sapiens GN=HSPE1 PE=1 SV=2	HUMAN	21	0.8155	1.0098	0.8956	0.9288
2387	4.26	4.85	19.7	sp|O15498|YKT6_HUMAN	Synaptobrevin homolog YKT6 OS=Homo sapiens GN=YKT6 PE=1 SV=1	HUMAN	4	0.8156	0.8036	0.8267	0.9289
571	20.51	21.24	33.8	sp|Q70J99|UN13D_HUMAN	Protein unc-13 homolog D OS=Homo sapiens GN=UNC13D PE=1 SV=1	HUMAN	14	0.8156	0.9195	0.8056	0.929
1766	7.09	7.29	61.1	sp|Q9NRX1|PNO1_HUMAN	RNA-binding protein PNO1 OS=Homo sapiens GN=PNO1 PE=1 SV=1	HUMAN	6	0.8158	1.1705	0.8171	0.929
3172	2.11	2.72	29.2	sp|Q9NRY4|RHG35_HUMAN	Rho GTPase-activating protein 35 OS=Homo sapiens GN=ARHGAP35 PE=1 SV=3	HUMAN	4	0.8159	0.7069	0.9174	0.9291
1294	10.34	10.87	57.1	sp|O00560|SDCB1_HUMAN	Syntenin-1 OS=Homo sapiens GN=SDCBP PE=1 SV=1	HUMAN	8	0.8159	0.9902	0.7685	0.9292
204	39.95	43.68	56.9	sp|Q99798|ACON_HUMAN	Aconitate hydratase, mitochondrial OS=Homo sapiens GN=ACO2 PE=1 SV=2	HUMAN	39	0.8159	0.9525	0.8478	0.9292
3060	2.33	2.51	22.6	sp|O43149|ZZEF1_HUMAN	Zinc finger ZZ-type and EF-hand domain-containing protein 1 OS=Homo sapiens GN=ZZEF1 PE=1 SV=6	HUMAN	2	0.8159	1.0116	0.9398	0.9295
1156	11.81	16.16	41.9	sp|Q7L2E3|DHX30_HUMAN	Putative ATP-dependent RNA helicase DHX30 OS=Homo sapiens GN=DHX30 PE=1 SV=1	HUMAN	11	0.816	1.0361	0.8109	0.9296
3315	2.02	2.19	24.5	sp|Q9BRR9|RHG09_HUMAN	Rho GTPase-activating protein 9 OS=Homo sapiens GN=ARHGAP9 PE=1 SV=2	HUMAN	1	0.816	0.9722	1.0739	0.9297
2758	3.52	3.86	19.2	sp|Q6P3W7|SCYL2_HUMAN	SCY1-like protein 2 OS=Homo sapiens GN=SCYL2 PE=1 SV=1	HUMAN	2	0.8162	1.0695	0.8153	0.9299
3253	2.04	2.19	38.7	sp|Q8IVW6|ARI3B_HUMAN	AT-rich interactive domain-containing protein 3B OS=Homo sapiens GN=ARID3B PE=1 SV=2	HUMAN	1	0.8162	0.99	0.9831	0.9299
2812	3.25	3.29	18.2	sp|Q9H9Q2|CSN7B_HUMAN	COP9 signalosome complex subunit 7b OS=Homo sapiens GN=COPS7B PE=1 SV=1	HUMAN	2	0.8162	1.1409	0.928	0.9301
1409	9.45	10.37	29.9	sp|Q5H9R7|PP6R3_HUMAN	Serine/threonine-protein phosphatase 6 regulatory subunit 3 OS=Homo sapiens GN=PPP6R3 PE=1 SV=2	HUMAN	6	0.8163	0.9453	0.8894	0.9303
4161	0.54	0.55	42	sp|Q9NSA3|CNBP1_HUMAN	Beta-catenin-interacting protein 1 OS=Homo sapiens GN=CTNNBIP1 PE=1 SV=1	HUMAN	1	0.8165	0.5595	1.231	0.9304
1302	10.28	10.73	59.9	sp|Q86WV6|TM173_HUMAN	Transmembrane protein 173 OS=Homo sapiens GN=TMEM173 PE=1 SV=1	HUMAN	10	0.8165	0.9384	0.9777	0.9304
4716	0.08	0.22	23.5	sp|Q8IVW4|CDKL3_HUMAN	Cyclin-dependent kinase-like 3 OS=Homo sapiens GN=CDKL3 PE=2 SV=1	HUMAN	0	0.8166	1.0368	0.6432	0.9309
676	18.4	20.22	50.9	sp|Q96G46|DUS3L_HUMAN	tRNA-dihydrouridine(47) synthase [NAD(P)(+)]-like OS=Homo sapiens GN=DUS3L PE=1 SV=2	HUMAN	11	0.8166	0.9847	0.8155	0.931
2178	5.32	6.12	41.5	sp|O60762|DPM1_HUMAN	Dolichol-phosphate mannosyltransferase OS=Homo sapiens GN=DPM1 PE=1 SV=1	HUMAN	3	0.8167	0.9732	0.7264	0.9311
3	210.13	210.5	64.3	sp|P21333|FLNA_HUMAN	Filamin-A OS=Homo sapiens GN=FLNA PE=1 SV=4	HUMAN	204	0.8167	0.9754	0.8545	0.9313
1010	13.44	13.67	42.2	sp|P07339|CATD_HUMAN	Cathepsin D OS=Homo sapiens GN=CTSD PE=1 SV=1	HUMAN	17	0.8167	0.921	0.9178	0.9316
185	42.23	43.56	68.5	sp|P39023|RL3_HUMAN	60S ribosomal protein L3 OS=Homo sapiens GN=RPL3 PE=1 SV=2	HUMAN	46	0.8167	0.9896	0.8944	0.9316
2042	6	6.13	44.3	sp|Q6DKI1|RL7L_HUMAN	60S ribosomal protein L7-like 1 OS=Homo sapiens GN=RPL7L1 PE=1 SV=1	HUMAN	6	0.8168	0.8701	0.8581	0.9318
1761	7.16	7.23	39.7	sp|Q9BXW7|CECR5_HUMAN	Cat eye syndrome critical region protein 5 OS=Homo sapiens GN=CECR5 PE=1 SV=1	HUMAN	5	0.8171	1.2267	0.7216	0.9319
1266	10.6	10.6	45.6	sp|P11908|PRPS2_HUMAN	Ribose-phosphate pyrophosphokinase 2 OS=Homo sapiens GN=PRPS2 PE=1 SV=2	HUMAN	6	0.8173	0.8209	0.9087	0.932
2795	3.36	3.46	25.7	sp|Q6GMV3|PTRD1_HUMAN	Putative peptidyl-tRNA hydrolase PTRHD1 OS=Homo sapiens GN=PTRHD1 PE=1 SV=1	HUMAN	2	0.8173	1.0859	0.966	0.9321
901	14.76	14.87	82.1	sp|O15511|ARPC5_HUMAN	Actin-related protein 2/3 complex subunit 5 OS=Homo sapiens GN=ARPC5 PE=1 SV=3	HUMAN	18	0.8174	0.9826	0.7881	0.9321
1504	8.67	9.2	25.7	sp|Q8WWI5|CTL1_HUMAN	Choline transporter-like protein 1 OS=Homo sapiens GN=SLC44A1 PE=1 SV=1	HUMAN	7	0.8174	0.9283	0.9067	0.9322
122	51.4	54.3	72.5	sp|Q9NR30|DDX21_HUMAN	Nucleolar RNA helicase 2 OS=Homo sapiens GN=DDX21 PE=1 SV=5	HUMAN	35	0.8175	0.9547	0.838	0.9325
262	34.83	36.1	68.8	sp|Q16543|CDC37_HUMAN	Hsp90 co-chaperone Cdc37 OS=Homo sapiens GN=CDC37 PE=1 SV=1	HUMAN	27	0.8175	0.9456	0.8562	0.9325
1110	12.26	14.83	33.2	sp|Q8TEQ6|GEMI5_HUMAN	Gem-associated protein 5 OS=Homo sapiens GN=GEMIN5 PE=1 SV=3	HUMAN	8	0.8175	1.058	0.8464	0.9327
385	26.44	27.56	91.3	sp|P16949|STMN1_HUMAN	Stathmin OS=Homo sapiens GN=STMN1 PE=1 SV=3	HUMAN	19	0.8176	1.0245	0.8279	0.9328
401	25.89	33.45	59.5	sp|P45880|VDAC2_HUMAN	Voltage-dependent anion-selective channel protein 2 OS=Homo sapiens GN=VDAC2 PE=1 SV=2	HUMAN	37	0.8176	0.9817	0.8936	0.9331
531	21.49	24.25	64.6	sp|Q02878|RL6_HUMAN	60S ribosomal protein L6 OS=Homo sapiens GN=RPL6 PE=1 SV=3	HUMAN	16	0.8177	0.9555	0.882	0.9332
258	35.18	35.49	81	sp|P62701|RS4X_HUMAN	40S ribosomal protein S4, X isoform OS=Homo sapiens GN=RPS4X PE=1 SV=2	HUMAN	37	0.8177	0.9663	0.8845	0.9333
36	84.88	85.1	96.4	sp|P04075|ALDOA_HUMAN	Fructose-bisphosphate aldolase A OS=Homo sapiens GN=ALDOA PE=1 SV=2	HUMAN	128	0.818	0.9811	0.8459	0.9336
72	66.02	69.66	60.8	sp|Q14566|MCM6_HUMAN	DNA replication licensing factor MCM6 OS=Homo sapiens GN=MCM6 PE=1 SV=1	HUMAN	40	0.818	0.9995	0.8496	0.9336
51	76.94	78.13	76	sp|P49368|TCPG_HUMAN	T-complex protein 1 subunit gamma OS=Homo sapiens GN=CCT3 PE=1 SV=4	HUMAN	82	0.8181	0.9712	0.8135	0.9336
2931	2.75	3.08	26.4	sp|Q9BXB4|OSB11_HUMAN	Oxysterol-binding protein-related protein 11 OS=Homo sapiens GN=OSBPL11 PE=1 SV=2	HUMAN	2	0.8183	0.4872	0.7298	0.9338
3092	2.25	6.65	54.1	sp|P83916|CBX1_HUMAN	Chromobox protein homolog 1 OS=Homo sapiens GN=CBX1 PE=1 SV=1	HUMAN	8	0.8184	1.0767	0.8239	0.9338
2059	6	6	20.1	sp|P13747|HLAE_HUMAN	HLA class I histocompatibility antigen, alpha chain E OS=Homo sapiens GN=HLA-E PE=1 SV=3	HUMAN	4	0.8186	0.8811	0.8747	0.9343
1177	11.48	12.03	42.2	sp|O75717|WDHD1_HUMAN	WD repeat and HMG-box DNA-binding protein 1 OS=Homo sapiens GN=WDHD1 PE=1 SV=1	HUMAN	7	0.8187	0.8206	0.7737	0.9346
1277	10.49	11.43	59	sp|P31942|HNRH3_HUMAN	Heterogeneous nuclear ribonucleoprotein H3 OS=Homo sapiens GN=HNRNPH3 PE=1 SV=2	HUMAN	14	0.8189	0.9349	0.8621	0.9347
99	57.28	57.81	62.5	sp|P06744|G6PI_HUMAN	Glucose-6-phosphate isomerase OS=Homo sapiens GN=GPI PE=1 SV=4	HUMAN	91	0.8189	1.007	0.8303	0.9348
318	29.66	30.77	71.5	sp|P05141|ADT2_HUMAN	ADP/ATP translocase 2 OS=Homo sapiens GN=SLC25A5 PE=1 SV=7	HUMAN	33	0.8191	0.9251	0.8999	0.9348
2384	4.28	4.38	41.6	sp|P56556|NDUA6_HUMAN	NADH dehydrogenase [ubiquinone] 1 alpha subcomplex subunit 6 OS=Homo sapiens GN=NDUFA6 PE=1 SV=3	HUMAN	3	0.8193	0.8953	0.8111	0.9349
1251	10.7	10.71	56.2	sp|P06730|IF4E_HUMAN	Eukaryotic translation initiation factor 4E OS=Homo sapiens GN=EIF4E PE=1 SV=2	HUMAN	8	0.8193	1.0069	0.8626	0.935
104	55.3	59.66	66.2	sp|Q9UQE7|SMC3_HUMAN	Structural maintenance of chromosomes protein 3 OS=Homo sapiens GN=SMC3 PE=1 SV=2	HUMAN	37	0.8195	0.9203	0.8786	0.935
455	23.94	24.06	43.9	sp|P04844|RPN2_HUMAN	Dolichyl-diphosphooligosaccharide--protein glycosyltransferase subunit 2 OS=Homo sapiens GN=RPN2 PE=1 SV=3	HUMAN	20	0.8195	0.9747	0.8786	0.9352
2385	4.28	4.31	39.5	sp|P51970|NDUA8_HUMAN	NADH dehydrogenase [ubiquinone] 1 alpha subcomplex subunit 8 OS=Homo sapiens GN=NDUFA8 PE=1 SV=3	HUMAN	4	0.8196	0.9932	0.7736	0.9352
1021	13.32	13.43	49.1	sp|O43684|BUB3_HUMAN	Mitotic checkpoint protein BUB3 OS=Homo sapiens GN=BUB3 PE=1 SV=1	HUMAN	15	0.8197	1.0162	0.8083	0.9352
1227	10.92	11.06	53.6	sp|O14579|COPE_HUMAN	Coatomer subunit epsilon OS=Homo sapiens GN=COPE PE=1 SV=3	HUMAN	7	0.8198	0.9372	0.849	0.9353
3851	1.59	1.64	21.8	sp|Q4G148|GXLT1_HUMAN	Glucoside xylosyltransferase 1 OS=Homo sapiens GN=GXYLT1 PE=1 SV=2	HUMAN	1	0.82	0.9816	0.6408	0.9354
1215	11.12	12.29	29.6	sp|P27707|DCK_HUMAN	Deoxycytidine kinase OS=Homo sapiens GN=DCK PE=1 SV=1	HUMAN	7	0.8201	0.9745	0.8551	0.9355
830	15.84	18.2	31.8	sp|Q9P107|GMIP_HUMAN	GEM-interacting protein OS=Homo sapiens GN=GMIP PE=1 SV=2	HUMAN	11	0.8201	1.0055	0.857	0.9355
4069	0.79	0.84	15.6	sp|Q9H446|RWDD1_HUMAN	RWD domain-containing protein 1 OS=Homo sapiens GN=RWDD1 PE=1 SV=1	HUMAN	1	0.8202	0.7063	0.9573	0.9356
226	37.96	40.95	78.8	sp|P08133|ANXA6_HUMAN	Annexin A6 OS=Homo sapiens GN=ANXA6 PE=1 SV=3	HUMAN	29	0.8202	0.9964	0.8337	0.9357
305	30.76	32.18	59.7	sp|Q9UBT2|SAE2_HUMAN	SUMO-activating enzyme subunit 2 OS=Homo sapiens GN=UBA2 PE=1 SV=2	HUMAN	27	0.8204	0.9318	0.8253	0.9357
976	13.85	15	41.7	sp|P98175|RBM10_HUMAN	RNA-binding protein 10 OS=Homo sapiens GN=RBM10 PE=1 SV=3	HUMAN	9	0.8204	0.9489	0.8644	0.9357
292	31.71	34.62	60.1	sp|Q15418|KS6A1_HUMAN	Ribosomal protein S6 kinase alpha-1 OS=Homo sapiens GN=RPS6KA1 PE=1 SV=2	HUMAN	21	0.8205	0.9289	0.9097	0.936
479	23.03	23.9	68.3	sp|Q96C19|EFHD2_HUMAN	EF-hand domain-containing protein D2 OS=Homo sapiens GN=EFHD2 PE=1 SV=1	HUMAN	14	0.8206	0.9196	0.8356	0.9361
447	24.18	24.81	58.1	sp|P40121|CAPG_HUMAN	Macrophage-capping protein OS=Homo sapiens GN=CAPG PE=1 SV=2	HUMAN	30	0.8208	1.0217	0.8323	0.9363
356	27.58	27.9	53.4	sp|P55010|IF5_HUMAN	Eukaryotic translation initiation factor 5 OS=Homo sapiens GN=EIF5 PE=1 SV=2	HUMAN	17	0.8208	0.9997	0.8886	0.9365
588	20.3	20.3	69	sp|Q9HC38|GLOD4_HUMAN	Glyoxalase domain-containing protein 4 OS=Homo sapiens GN=GLOD4 PE=1 SV=1	HUMAN	13	0.8208	0.9815	0.9076	0.9368
723	17.61	17.83	48.8	sp|P60228|EIF3E_HUMAN	Eukaryotic translation initiation factor 3 subunit E OS=Homo sapiens GN=EIF3E PE=1 SV=1	HUMAN	26	0.8209	0.8566	0.8537	0.9368
1223	11.01	11.27	57.6	sp|P48739|PIPNB_HUMAN	Phosphatidylinositol transfer protein beta isoform OS=Homo sapiens GN=PITPNB PE=1 SV=2	HUMAN	6	0.821	0.8576	0.8337	0.9369
2490	4.04	4.54	29.6	sp|Q969Z0|TBRG4_HUMAN	Protein TBRG4 OS=Homo sapiens GN=TBRG4 PE=1 SV=1	HUMAN	2	0.821	0.8311	1.0038	0.937
1585	8.15	8.27	38.4	sp|Q96A35|RM24_HUMAN	39S ribosomal protein L24, mitochondrial OS=Homo sapiens GN=MRPL24 PE=1 SV=1	HUMAN	5	0.8212	0.8595	0.9624	0.937
1721	7.45	7.54	81	sp|P55008|AIF1_HUMAN	Allograft inflammatory factor 1 OS=Homo sapiens GN=AIF1 PE=1 SV=1	HUMAN	4	0.8213	0.87	0.9165	0.9371
270	33.71	38.46	72.7	sp|O75874|IDHC_HUMAN	Isocitrate dehydrogenase [NADP] cytoplasmic OS=Homo sapiens GN=IDH1 PE=1 SV=2	HUMAN	33	0.8213	0.944	0.8811	0.9372
3827	1.67	1.87	25.3	sp|Q969S9|RRF2M_HUMAN	Ribosome-releasing factor 2, mitochondrial OS=Homo sapiens GN=GFM2 PE=1 SV=1	HUMAN	2	0.8214	1.118	0.5883	0.9374
29	89.43	90.66	81.6	sp|P52272|HNRPM_HUMAN	Heterogeneous nuclear ribonucleoprotein M OS=Homo sapiens GN=HNRNPM PE=1 SV=3	HUMAN	89	0.8215	0.9724	0.839	0.9376
2820	3.23	3.4	23.1	sp|Q9NPG3|UBN1_HUMAN	Ubinuclein-1 OS=Homo sapiens GN=UBN1 PE=1 SV=2	HUMAN	3	0.8216	0.6566	0.7535	0.9376
1258	10.66	11.03	89.2	sp|P63220|RS21_HUMAN	40S ribosomal protein S21 OS=Homo sapiens GN=RPS21 PE=1 SV=1	HUMAN	10	0.8216	0.8845	1.0369	0.9377
171	43.51	44.1	78.8	sp|P61247|RS3A_HUMAN	40S ribosomal protein S3a OS=Homo sapiens GN=RPS3A PE=1 SV=2	HUMAN	38	0.8217	0.9864	0.8536	0.9379
683	18.29	18.84	41.2	sp|Q9UBU9|NXF1_HUMAN	Nuclear RNA export factor 1 OS=Homo sapiens GN=NXF1 PE=1 SV=1	HUMAN	10	0.8217	0.8615	0.9887	0.938
2151	5.47	9.84	43.9	sp|O60749|SNX2_HUMAN	Sorting nexin-2 OS=Homo sapiens GN=SNX2 PE=1 SV=2	HUMAN	5	0.8217	1.0505	0.968	0.9383
2369	4.36	4.46	22.6	sp|P48651|PTSS1_HUMAN	Phosphatidylserine synthase 1 OS=Homo sapiens GN=PTDSS1 PE=1 SV=1	HUMAN	3	0.8219	0.7992	1.1302	0.9384
3048	2.36	2.76	28.8	sp|Q92990|GLMN_HUMAN	Glomulin OS=Homo sapiens GN=GLMN PE=1 SV=2	HUMAN	2	0.8219	0.9488	1.0922	0.9384
157	45.6	48.39	78.4	sp|P61978|HNRPK_HUMAN	Heterogeneous nuclear ribonucleoprotein K OS=Homo sapiens GN=HNRNPK PE=1 SV=1	HUMAN	54	0.822	0.9472	0.8155	0.9384
505	22.28	22.52	73.4	sp|Q07021|C1QBP_HUMAN	Complement component 1 Q subcomponent-binding protein, mitochondrial OS=Homo sapiens GN=C1QBP PE=1 SV=1	HUMAN	27	0.822	1.0721	0.7883	0.9385
3466	2	10.1	63.3	sp|P18085|ARF4_HUMAN	ADP-ribosylation factor 4 OS=Homo sapiens GN=ARF4 PE=1 SV=3	HUMAN	8	0.8221	0.802	0.9636	0.9385
116	52.64	55	62	sp|Q00341|VIGLN_HUMAN	Vigilin OS=Homo sapiens GN=HDLBP PE=1 SV=2	HUMAN	36	0.8223	0.8278	0.8405	0.9386
2085	5.87	5.87	43.5	sp|P56385|ATP5I_HUMAN	ATP synthase subunit e, mitochondrial OS=Homo sapiens GN=ATP5I PE=1 SV=2	HUMAN	4	0.8223	1.2912	0.7099	0.9386
4781	0.07	0.13	19.6	sp|Q6P9F0|CCD62_HUMAN	Coiled-coil domain-containing protein 62 OS=Homo sapiens GN=CCDC62 PE=1 SV=2	HUMAN	0	0.8224	0.6265	0.9671	0.9388
778	16.74	17.15	31.8	sp|Q14966|ZN638_HUMAN	Zinc finger protein 638 OS=Homo sapiens GN=ZNF638 PE=1 SV=2	HUMAN	10	0.8226	0.9419	0.888	0.9389
1228	10.91	11	51.5	sp|P52815|RM12_HUMAN	39S ribosomal protein L12, mitochondrial OS=Homo sapiens GN=MRPL12 PE=1 SV=2	HUMAN	13	0.8226	1.0084	0.9104	0.9389
1808	6.86	6.91	22.8	sp|Q15070|OXA1L_HUMAN	Mitochondrial inner membrane protein OXA1L OS=Homo sapiens GN=OXA1L PE=1 SV=3	HUMAN	4	0.8227	0.8978	0.872	0.9389
2418	4.17	4.17	28.5	sp|O95989|NUDT3_HUMAN	Diphosphoinositol polyphosphate phosphohydrolase 1 OS=Homo sapiens GN=NUDT3 PE=1 SV=1	HUMAN	2	0.8227	0.9036	0.891	0.9389
3335	2.02	2.05	34.2	sp|Q9UBX3|DIC_HUMAN	Mitochondrial dicarboxylate carrier OS=Homo sapiens GN=SLC25A10 PE=1 SV=2	HUMAN	1	0.8228	0.7905	0.8478	0.9392
1862	6.48	6.87	43.1	sp|O43837|IDH3B_HUMAN	Isocitrate dehydrogenase [NAD] subunit beta, mitochondrial OS=Homo sapiens GN=IDH3B PE=1 SV=2	HUMAN	6	0.8229	0.9308	0.8717	0.9392
642	19.11	19.65	40.5	sp|Q9ULV4|COR1C_HUMAN	Coronin-1C OS=Homo sapiens GN=CORO1C PE=1 SV=1	HUMAN	12	0.823	0.969	0.878	0.9393
1361	9.94	10.2	42.4	sp|P21283|VATC1_HUMAN	V-type proton ATPase subunit C 1 OS=Homo sapiens GN=ATP6V1C1 PE=1 SV=4	HUMAN	6	0.8231	0.9313	0.8175	0.9394
1324	10.11	10.71	61.4	sp|P61254|RL26_HUMAN	60S ribosomal protein L26 OS=Homo sapiens GN=RPL26 PE=1 SV=1	HUMAN	8	0.8231	0.985	0.7738	0.9395
3963	1.12	1.31	19.1	sp|Q9NZ52|GGA3_HUMAN	ADP-ribosylation factor-binding protein GGA3 OS=Homo sapiens GN=GGA3 PE=1 SV=1	HUMAN	1	0.8231	1.1645	1.7638	0.9395
502	22.34	23.38	56.2	sp|P48444|COPD_HUMAN	Coatomer subunit delta OS=Homo sapiens GN=ARCN1 PE=1 SV=1	HUMAN	21	0.8233	0.955	0.8806	0.9395
2099	5.79	5.83	49.6	sp|Q9NPA0|EMC7_HUMAN	ER membrane protein complex subunit 7 OS=Homo sapiens GN=EMC7 PE=1 SV=1	HUMAN	3	0.8233	0.8991	0.9438	0.9395
493	22.59	22.96	58.8	sp|P08758|ANXA5_HUMAN	Annexin A5 OS=Homo sapiens GN=ANXA5 PE=1 SV=2	HUMAN	11	0.8233	0.976	0.8769	0.9396
10	143.47	146.56	89.9	sp|P10809|CH60_HUMAN	60 kDa heat shock protein, mitochondrial OS=Homo sapiens GN=HSPD1 PE=1 SV=2	HUMAN	194	0.8233	0.982	0.8703	0.9397
54	74.84	78.17	49.8	sp|O75643|U520_HUMAN	U5 small nuclear ribonucleoprotein 200 kDa helicase OS=Homo sapiens GN=SNRNP200 PE=1 SV=2	HUMAN	62	0.8234	0.9332	0.8596	0.9398
2138	5.55	5.72	22.8	sp|Q9HAR2|LPHN3_HUMAN	Latrophilin-3 OS=Homo sapiens GN=LPHN3 PE=1 SV=2	HUMAN	4	0.8235	1.0069	0.9279	0.9398
2351	4.42	4.61	35.2	sp|A8MXV4|NUD19_HUMAN	Nucleoside diphosphate-linked moiety X motif 19, mitochondrial OS=Homo sapiens GN=NUDT19 PE=1 SV=1	HUMAN	3	0.8236	0.8557	0.8551	0.94
329	28.96	29.75	53.5	sp|Q9Y3I0|RTCB_HUMAN	tRNA-splicing ligase RtcB homolog OS=Homo sapiens GN=C22orf28 PE=1 SV=1	HUMAN	24	0.8237	0.9683	0.8594	0.94
119	52.03	61.51	79.6	sp|P09651|ROA1_HUMAN	Heterogeneous nuclear ribonucleoprotein A1 OS=Homo sapiens GN=HNRNPA1 PE=1 SV=5	HUMAN	83	0.8238	1.0029	0.8069	0.9402
1744	7.28	7.31	29.3	sp|O95319|CELF2_HUMAN	CUGBP Elav-like family member 2 OS=Homo sapiens GN=CELF2 PE=1 SV=1	HUMAN	4	0.8238	1.0118	0.8268	0.9403
1627	8	8.45	50.6	sp|P24666|PPAC_HUMAN	Low molecular weight phosphotyrosine protein phosphatase OS=Homo sapiens GN=ACP1 PE=1 SV=3	HUMAN	6	0.8238	1.0811	0.7977	0.9403
2790	3.37	3.58	21.8	sp|Q9BZ95|NSD3_HUMAN	Histone-lysine N-methyltransferase NSD3 OS=Homo sapiens GN=WHSC1L1 PE=1 SV=1	HUMAN	4	0.8238	0.9207	0.9778	0.9403
389	26.29	27.5	44.5	sp|P42224|STAT1_HUMAN	Signal transducer and activator of transcription 1-alpha/beta OS=Homo sapiens GN=STAT1 PE=1 SV=2	HUMAN	15	0.8239	0.9024	0.8134	0.9405
142	47.29	48.86	78.3	sp|P26599|PTBP1_HUMAN	Polypyrimidine tract-binding protein 1 OS=Homo sapiens GN=PTBP1 PE=1 SV=1	HUMAN	55	0.8239	0.9036	0.8695	0.9407
3029	2.42	2.45	47.4	sp|O75608|LYPA1_HUMAN	Acyl-protein thioesterase 1 OS=Homo sapiens GN=LYPLA1 PE=1 SV=1	HUMAN	4	0.824	0.9139	0.9048	0.941
1422	9.36	14.52	58.6	sp|P16989|DBPA_HUMAN	DNA-binding protein A OS=Homo sapiens GN=CSDA PE=1 SV=4	HUMAN	11	0.8241	1.0064	0.7039	0.941
3437	2.01	2.05	13.4	sp|P08047|SP1_HUMAN	Transcription factor Sp1 OS=Homo sapiens GN=SP1 PE=1 SV=3	HUMAN	3	0.8242	1.0529	0.6681	0.9411
2930	2.76	2.95	36.7	sp|Q2M2I8|AAK1_HUMAN	AP2-associated protein kinase 1 OS=Homo sapiens GN=AAK1 PE=1 SV=3	HUMAN	3	0.8242	0.729	1.2076	0.9411
229	37.67	40.48	55.3	sp|P04264|K2C1_HUMAN	Keratin, type II cytoskeletal 1 OS=Homo sapiens GN=KRT1 PE=1 SV=6	HUMAN	28	0.8242	1.3123	0.8276	0.9412
790	16.56	20.93	40.3	sp|Q99733|NP1L4_HUMAN	Nucleosome assembly protein 1-like 4 OS=Homo sapiens GN=NAP1L4 PE=1 SV=1	HUMAN	15	0.8243	0.9705	0.8813	0.942
345	28.1	29.53	64.1	sp|O95831|AIFM1_HUMAN	Apoptosis-inducing factor 1, mitochondrial OS=Homo sapiens GN=AIFM1 PE=1 SV=1	HUMAN	21	0.8244	0.9651	0.8681	0.942
4000	1	1.05	20.2	sp|Q8NBM8|PCYXL_HUMAN	Prenylcysteine oxidase-like OS=Homo sapiens GN=PCYOX1L PE=1 SV=2	HUMAN	2	0.8246	1.6151	1.0871	0.9422
3299	2.02	3.08	33.9	sp|Q12912|LRMP_HUMAN	Lymphoid-restricted membrane protein OS=Homo sapiens GN=LRMP PE=1 SV=3	HUMAN	2	0.8248	0.8462	0.884	0.9424
761	17.12	18.62	83.2	sp|P62899|RL31_HUMAN	60S ribosomal protein L31 OS=Homo sapiens GN=RPL31 PE=1 SV=1	HUMAN	20	0.8249	0.9317	0.8439	0.9424
1136	12.02	12.09	64.6	sp|Q9Y3B7|RM11_HUMAN	39S ribosomal protein L11, mitochondrial OS=Homo sapiens GN=MRPL11 PE=1 SV=1	HUMAN	5	0.8249	1.0028	0.8068	0.9425
1562	8.28	8.93	58.2	sp|P49821|NDUV1_HUMAN	NADH dehydrogenase [ubiquinone] flavoprotein 1, mitochondrial OS=Homo sapiens GN=NDUFV1 PE=1 SV=4	HUMAN	8	0.825	1.0235	0.8983	0.9428
37	84.8	86.32	71.3	sp|P12956|XRCC6_HUMAN	X-ray repair cross-complementing protein 6 OS=Homo sapiens GN=XRCC6 PE=1 SV=2	HUMAN	67	0.8251	0.9818	0.849	0.9428
937	14.27	18.96	82.5	sp|O15347|HMGB3_HUMAN	High mobility group protein B3 OS=Homo sapiens GN=HMGB3 PE=1 SV=4	HUMAN	13	0.8252	0.9766	0.8256	0.9429
1747	7.25	27.42	74.2	sp|P62820|RAB1A_HUMAN	Ras-related protein Rab-1A OS=Homo sapiens GN=RAB1A PE=1 SV=3	HUMAN	21	0.8252	0.9433	0.8564	0.943
491	22.68	25.01	45.6	sp|P43246|MSH2_HUMAN	DNA mismatch repair protein Msh2 OS=Homo sapiens GN=MSH2 PE=1 SV=1	HUMAN	16	0.8255	0.9646	0.8173	0.9433
178	42.66	46.24	62.9	sp|P46459|NSF_HUMAN	Vesicle-fusing ATPase OS=Homo sapiens GN=NSF PE=1 SV=3	HUMAN	29	0.8256	1.0157	0.83	0.9433
1643	7.99	8.16	25.2	sp|P20073|ANXA7_HUMAN	Annexin A7 OS=Homo sapiens GN=ANXA7 PE=1 SV=3	HUMAN	5	0.8257	0.8966	0.8032	0.9435
3736	2	2	39.4	sp|Q9Y3D5|RT18C_HUMAN	28S ribosomal protein S18c, mitochondrial OS=Homo sapiens GN=MRPS18C PE=1 SV=1	HUMAN	1	0.8257	0.9908	0.8653	0.9436
2981	2.55	3.6	27.8	sp|Q9H4L7|SMRCD_HUMAN	SWI/SNF-related matrix-associated actin-dependent regulator of chromatin subfamily A containing DEAD/H box 1 OS=Homo sapiens GN=SMARCAD1 PE=1 SV=2	HUMAN	3	0.8257	1.2979	0.6679	0.9437
2029	6.01	6.02	34.4	sp|P55769|NH2L1_HUMAN	NHP2-like protein 1 OS=Homo sapiens GN=NHP2L1 PE=1 SV=3	HUMAN	8	0.8257	1.002	0.8911	0.9437
1176	11.49	11.66	55	sp|Q9UBS4|DJB11_HUMAN	DnaJ homolog subfamily B member 11 OS=Homo sapiens GN=DNAJB11 PE=1 SV=1	HUMAN	11	0.8258	0.8854	0.9249	0.9439
167	43.89	46.9	52	sp|P53621|COPA_HUMAN	Coatomer subunit alpha OS=Homo sapiens GN=COPA PE=1 SV=2	HUMAN	44	0.826	0.9409	0.8562	0.9439
696	18.1	18.3	46.9	sp|Q9P2R7|SUCB1_HUMAN	Succinyl-CoA ligase [ADP-forming] subunit beta, mitochondrial OS=Homo sapiens GN=SUCLA2 PE=1 SV=3	HUMAN	9	0.826	0.9624	0.9186	0.9439
2722	3.68	3.69	49	sp|Q9BV40|VAMP8_HUMAN	Vesicle-associated membrane protein 8 OS=Homo sapiens GN=VAMP8 PE=1 SV=1	HUMAN	2	0.8261	0.9441	0.925	0.9441
929	14.42	14.86	46.2	sp|P10644|KAP0_HUMAN	cAMP-dependent protein kinase type I-alpha regulatory subunit OS=Homo sapiens GN=PRKAR1A PE=1 SV=1	HUMAN	10	0.8262	0.8992	0.8388	0.9442
150	46.33	47.97	73.8	sp|Q16555|DPYL2_HUMAN	Dihydropyrimidinase-related protein 2 OS=Homo sapiens GN=DPYSL2 PE=1 SV=1	HUMAN	49	0.8262	1	0.8878	0.9442
4428	0.18	0.31	21.2	sp|Q9BZG8|DPH1_HUMAN	Diphthamide biosynthesis protein 1 OS=Homo sapiens GN=DPH1 PE=1 SV=2	HUMAN	0	0.8263	0.4637	1.4846	0.9442
4246	0.37	25.26	83.1	sp|P84243|H33_HUMAN	Histone H3.3 OS=Homo sapiens GN=H3F3A PE=1 SV=2	HUMAN	19	0.8265	0.8305	0.9705	0.9442
1190	11.39	11.49	59.9	sp|P23919|KTHY_HUMAN	Thymidylate kinase OS=Homo sapiens GN=DTYMK PE=1 SV=4	HUMAN	6	0.8266	1.0676	0.877	0.9443
1677	7.72	8.41	50.5	sp|P53007|TXTP_HUMAN	Tricarboxylate transport protein, mitochondrial OS=Homo sapiens GN=SLC25A1 PE=1 SV=2	HUMAN	8	0.8267	0.8627	0.887	0.9444
3440	2.01	2.05	73.9	sp|Q8TCC3|RM30_HUMAN	39S ribosomal protein L30, mitochondrial OS=Homo sapiens GN=MRPL30 PE=1 SV=1	HUMAN	1	0.8267	1.054	0.9145	0.9444
2241	5	5.11	32.7	sp|Q9Y394|DHRS7_HUMAN	Dehydrogenase/reductase SDR family member 7 OS=Homo sapiens GN=DHRS7 PE=1 SV=1	HUMAN	3	0.8269	1.1858	0.8803	0.9446
609	19.82	20.55	37.3	sp|Q9HD20|AT131_HUMAN	Probable cation-transporting ATPase 13A1 OS=Homo sapiens GN=ATP13A1 PE=1 SV=2	HUMAN	15	0.8271	0.9412	0.7548	0.9446
1374	9.84	10.3	36.4	sp|P01891|1A68_HUMAN	HLA class I histocompatibility antigen, A-68 alpha chain OS=Homo sapiens GN=HLA-A PE=1 SV=4	HUMAN	9	0.8271	0.9791	0.8094	0.9446
1678	7.72	8.19	26.1	sp|Q6WKZ4|RFIP1_HUMAN	Rab11 family-interacting protein 1 OS=Homo sapiens GN=RAB11FIP1 PE=1 SV=2	HUMAN	5	0.8273	0.9934	1.0198	0.9448
206	39.87	43.36	48	sp|P53618|COPB_HUMAN	Coatomer subunit beta OS=Homo sapiens GN=COPB1 PE=1 SV=3	HUMAN	25	0.8276	0.9547	0.8379	0.9449
159	45.34	47.17	74.6	sp|P61158|ARP3_HUMAN	Actin-related protein 3 OS=Homo sapiens GN=ACTR3 PE=1 SV=3	HUMAN	48	0.8277	0.9645	0.8057	0.945
355	27.6	28.06	87.2	sp|P62979|RS27A_HUMAN	Ubiquitin-40S ribosomal protein S27a OS=Homo sapiens GN=RPS27A PE=1 SV=2	HUMAN	27	0.8277	0.9516	0.9039	0.945
3390	2.01	2.29	52.9	sp|Q86VN1|VPS36_HUMAN	Vacuolar protein-sorting-associated protein 36 OS=Homo sapiens GN=VPS36 PE=1 SV=1	HUMAN	1	0.8278	1.0627	0.6738	0.945
2960	2.61	2.95	31.3	sp|Q9Y6D6|BIG1_HUMAN	Brefeldin A-inhibited guanine nucleotide-exchange protein 1 OS=Homo sapiens GN=ARFGEF1 PE=1 SV=2	HUMAN	2	0.828	0.7585	0.9062	0.9452
663	18.62	19.4	51.9	sp|O43242|PSMD3_HUMAN	26S proteasome non-ATPase regulatory subunit 3 OS=Homo sapiens GN=PSMD3 PE=1 SV=2	HUMAN	11	0.8283	0.9312	0.8836	0.9453
1047	12.98	14.37	56.6	sp|P84098|RL19_HUMAN	60S ribosomal protein L19 OS=Homo sapiens GN=RPL19 PE=1 SV=1	HUMAN	18	0.8283	1.0276	0.8248	0.9453
616	19.74	26.51	65.2	sp|P38919|IF4A3_HUMAN	Eukaryotic initiation factor 4A-III OS=Homo sapiens GN=EIF4A3 PE=1 SV=4	HUMAN	20	0.8283	1.0216	0.9705	0.9454
1119	12.15	12.49	73.5	sp|Q15080|NCF4_HUMAN	Neutrophil cytosol factor 4 OS=Homo sapiens GN=NCF4 PE=1 SV=2	HUMAN	7	0.8284	0.9632	0.7786	0.9454
1435	9.27	9.38	66.8	sp|Q96CT7|CC124_HUMAN	Coiled-coil domain-containing protein 124 OS=Homo sapiens GN=CCDC124 PE=1 SV=1	HUMAN	5	0.8285	0.9441	0.8227	0.9455
471	23.26	25	64.7	sp|P39748|FEN1_HUMAN	Flap endonuclease 1 OS=Homo sapiens GN=FEN1 PE=1 SV=1	HUMAN	26	0.8285	1.0064	0.8445	0.9457
2284	4.76	4.81	63.3	sp|Q13404|UB2V1_HUMAN	Ubiquitin-conjugating enzyme E2 variant 1 OS=Homo sapiens GN=UBE2V1 PE=1 SV=2	HUMAN	5	0.8286	0.9891	0.8493	0.9458
2117	5.69	5.77	44.2	sp|Q9Y2R9|RT07_HUMAN	28S ribosomal protein S7, mitochondrial OS=Homo sapiens GN=MRPS7 PE=1 SV=2	HUMAN	3	0.8287	1.0692	0.6564	0.9458
4630	0.1	0.18	34.9	sp|O43583|DENR_HUMAN	Density-regulated protein OS=Homo sapiens GN=DENR PE=1 SV=2	HUMAN	0	0.8289	0.7987	0.9882	0.9462
240	36.66	38.56	47.3	sp|Q9BSJ8|ESYT1_HUMAN	Extended synaptotagmin-1 OS=Homo sapiens GN=ESYT1 PE=1 SV=1	HUMAN	27	0.829	0.9628	0.8249	0.9464
1421	9.38	9.4	43.6	sp|Q9BS26|ERP44_HUMAN	Endoplasmic reticulum resident protein 44 OS=Homo sapiens GN=ERP44 PE=1 SV=1	HUMAN	8	0.8292	0.9913	0.8486	0.9465
844	15.58	15.84	73.7	sp|P47985|UCRI_HUMAN	Cytochrome b-c1 complex subunit Rieske, mitochondrial OS=Homo sapiens GN=UQCRFS1 PE=1 SV=2	HUMAN	15	0.8293	0.918	0.8856	0.9465
1493	8.76	8.76	40.1	sp|Q13303|KCAB2_HUMAN	Voltage-gated potassium channel subunit beta-2 OS=Homo sapiens GN=KCNAB2 PE=1 SV=2	HUMAN	6	0.8295	0.9811	0.8203	0.9465
3899	1.4	2.16	47.2	sp|Q13439|GOGA4_HUMAN	Golgin subfamily A member 4 OS=Homo sapiens GN=GOLGA4 PE=1 SV=1	HUMAN	3	0.8296	0.6883	0.9346	0.9465
1739	7.3	7.61	31.9	sp|Q9Y2D5|AKAP2_HUMAN	A-kinase anchor protein 2 OS=Homo sapiens GN=AKAP2 PE=1 SV=3	HUMAN	4	0.8296	0.8139	0.9034	0.9466
624	19.63	20.43	41.7	sp|Q86UX7|URP2_HUMAN	Fermitin family homolog 3 OS=Homo sapiens GN=FERMT3 PE=1 SV=1	HUMAN	14	0.8297	1.0214	0.8578	0.9466
281	32.85	33.44	61.1	sp|P11387|TOP1_HUMAN	DNA topoisomerase 1 OS=Homo sapiens GN=TOP1 PE=1 SV=2	HUMAN	21	0.8297	1.0207	0.8672	0.9466
2320	4.6	4.65	58.6	sp|Q9ULC4|MCTS1_HUMAN	Malignant T-cell-amplified sequence 1 OS=Homo sapiens GN=MCTS1 PE=1 SV=1	HUMAN	6	0.8297	1.0885	0.8139	0.9467
652	18.86	18.86	64.2	sp|P62263|RS14_HUMAN	40S ribosomal protein S14 OS=Homo sapiens GN=RPS14 PE=1 SV=3	HUMAN	22	0.8297	0.9768	0.9423	0.947
344	28.12	28.41	92.2	sp|P62993|GRB2_HUMAN	Growth factor receptor-bound protein 2 OS=Homo sapiens GN=GRB2 PE=1 SV=1	HUMAN	22	0.8298	0.9135	0.8148	0.9473
1151	11.93	12	55.6	sp|P47813|IF1AX_HUMAN	Eukaryotic translation initiation factor 1A, X-chromosomal OS=Homo sapiens GN=EIF1AX PE=1 SV=2	HUMAN	7	0.8298	0.9847	0.8691	0.9476
818	16.08	16.55	58.4	sp|Q7Z5L9|I2BP2_HUMAN	Interferon regulatory factor 2-binding protein 2 OS=Homo sapiens GN=IRF2BP2 PE=1 SV=2	HUMAN	15	0.8299	0.8726	0.9054	0.9477
1629	8	8.37	15.1	sp|Q96M27|PRRC1_HUMAN	Protein PRRC1 OS=Homo sapiens GN=PRRC1 PE=1 SV=1	HUMAN	4	0.8299	0.9127	0.867	0.9478
4627	0.1	0.23	29.7	RRRRRsp|Q96C10|DHX58_HUMAN	REVERSED Probable ATP-dependent RNA helicase DHX58 OS=Homo sapiens GN=DHX58 PE=1 SV=1	HUMAN	0	0.8299	0.9535	0.9129	0.9478
1714	7.5	7.64	70.8	sp|O15145|ARPC3_HUMAN	Actin-related protein 2/3 complex subunit 3 OS=Homo sapiens GN=ARPC3 PE=1 SV=3	HUMAN	7	0.83	0.9933	0.7844	0.9482
4149	0.57	0.85	21.6	sp|Q6AI08|HEAT6_HUMAN	HEAT repeat-containing protein 6 OS=Homo sapiens GN=HEATR6 PE=1 SV=1	HUMAN	1	0.8301	0.6819	0.6004	0.9485
1838	6.64	6.86	26	sp|Q10570|CPSF1_HUMAN	Cleavage and polyadenylation specificity factor subunit 1 OS=Homo sapiens GN=CPSF1 PE=1 SV=2	HUMAN	5	0.8303	0.7904	0.8831	0.9485
449	24.11	24.28	81.3	sp|P62917|RL8_HUMAN	60S ribosomal protein L8 OS=Homo sapiens GN=RPL8 PE=1 SV=2	HUMAN	18	0.8304	0.9893	0.924	0.9487
2637	4	4.03	39.9	sp|P62256|UBE2H_HUMAN	Ubiquitin-conjugating enzyme E2 H OS=Homo sapiens GN=UBE2H PE=1 SV=1	HUMAN	2	0.8305	0.6358	1.0625	0.9487
1338	10.04	10.13	49.8	sp|Q16740|CLPP_HUMAN	Putative ATP-dependent Clp protease proteolytic subunit, mitochondrial OS=Homo sapiens GN=CLPP PE=1 SV=1	HUMAN	9	0.8305	1.0107	0.8894	0.9488
2000	6.03	6.22	39	sp|P34949|MPI_HUMAN	Mannose-6-phosphate isomerase OS=Homo sapiens GN=MPI PE=1 SV=2	HUMAN	3	0.8306	1.0717	0.8264	0.9488
234	37.42	38.26	65.4	sp|P55884|EIF3B_HUMAN	Eukaryotic translation initiation factor 3 subunit B OS=Homo sapiens GN=EIF3B PE=1 SV=3	HUMAN	35	0.8307	0.9834	0.8416	0.9488
637	19.23	20.1	49.9	sp|O96019|ACL6A_HUMAN	Actin-like protein 6A OS=Homo sapiens GN=ACTL6A PE=1 SV=1	HUMAN	16	0.8307	1.0456	0.863	0.9491
1309	10.22	10.9	42.5	sp|Q9NUQ8|ABCF3_HUMAN	ATP-binding cassette sub-family F member 3 OS=Homo sapiens GN=ABCF3 PE=1 SV=2	HUMAN	5	0.8308	0.9232	0.9031	0.9493
1604	8.05	8.1	56.8	sp|Q14353|GAMT_HUMAN	Guanidinoacetate N-methyltransferase OS=Homo sapiens GN=GAMT PE=1 SV=1	HUMAN	7	0.8308	1.1721	0.8361	0.9493
1977	6.06	6.08	38.7	sp|Q969H8|CS010_HUMAN	UPF0556 protein C19orf10 OS=Homo sapiens GN=C19orf10 PE=1 SV=1	HUMAN	5	0.831	1.0171	0.9684	0.9494
1028	13.21	14.4	41.8	sp|P35573|GDE_HUMAN	Glycogen debranching enzyme OS=Homo sapiens GN=AGL PE=1 SV=3	HUMAN	7	0.8312	0.7623	0.9596	0.9495
2887	2.96	4.99	29.4	sp|Q96JB2|COG3_HUMAN	Conserved oligomeric Golgi complex subunit 3 OS=Homo sapiens GN=COG3 PE=1 SV=3	HUMAN	3	0.8313	0.8712	0.8716	0.9495
2435	4.13	4.26	16.3	sp|Q9H7D7|WDR26_HUMAN	WD repeat-containing protein 26 OS=Homo sapiens GN=WDR26 PE=1 SV=3	HUMAN	2	0.8315	0.6238	0.8006	0.9495
24	94.73	95.57	62.2	sp|P07814|SYEP_HUMAN	Bifunctional glutamate/proline--tRNA ligase OS=Homo sapiens GN=EPRS PE=1 SV=5	HUMAN	78	0.8315	0.9895	0.8539	0.9497
3213	2.07	2.14	14.9	sp|Q9H0U3|MAGT1_HUMAN	Magnesium transporter protein 1 OS=Homo sapiens GN=MAGT1 PE=1 SV=1	HUMAN	2	0.8315	1.3112	1.0457	0.9497
510	22.14	22.34	73.4	sp|P30044|PRDX5_HUMAN	Peroxiredoxin-5, mitochondrial OS=Homo sapiens GN=PRDX5 PE=1 SV=4	HUMAN	16	0.8317	0.969	0.8673	0.9498
1300	10.3	10.3	39.7	sp|Q15287|RNPS1_HUMAN	RNA-binding protein with serine-rich domain 1 OS=Homo sapiens GN=RNPS1 PE=1 SV=1	HUMAN	15	0.8318	1.0014	0.8502	0.9499
529	21.57	22.01	49.2	sp|O94826|TOM70_HUMAN	Mitochondrial import receptor subunit TOM70 OS=Homo sapiens GN=TOMM70A PE=1 SV=1	HUMAN	13	0.832	0.9184	0.8314	0.95
2991	2.52	2.61	35.1	sp|O75688|PPM1B_HUMAN	Protein phosphatase 1B OS=Homo sapiens GN=PPM1B PE=1 SV=1	HUMAN	2	0.832	0.9908	0.9099	0.95
4158	0.55	0.56	14.1	sp|Q6PII5|HAGHL_HUMAN	Hydroxyacylglutathione hydrolase-like protein OS=Homo sapiens GN=HAGHL PE=2 SV=1	HUMAN	1	0.8321	1.897	0.4277	0.9501
106	55.11	57.66	65.5	sp|P54136|SYRC_HUMAN	Arginine--tRNA ligase, cytoplasmic OS=Homo sapiens GN=RARS PE=1 SV=2	HUMAN	31	0.8323	0.9846	0.8085	0.9501
4519	0.13	0.98	33.7	sp|Q9UMY4|SNX12_HUMAN	Sorting nexin-12 OS=Homo sapiens GN=SNX12 PE=1 SV=3	HUMAN	1	0.8324	0.9088	0.7121	0.9502
492	22.67	24.24	67.3	sp|O14818|PSA7_HUMAN	Proteasome subunit alpha type-7 OS=Homo sapiens GN=PSMA7 PE=1 SV=1	HUMAN	21	0.8324	0.9219	0.8759	0.9503
151	46.31	47.24	69.1	sp|O75083|WDR1_HUMAN	WD repeat-containing protein 1 OS=Homo sapiens GN=WDR1 PE=1 SV=4	HUMAN	39	0.8324	0.9565	0.8555	0.9506
4024	0.91	1.05	14.6	sp|O15118|NPC1_HUMAN	Niemann-Pick C1 protein OS=Homo sapiens GN=NPC1 PE=1 SV=2	HUMAN	2	0.8325	0.6487	1.1446	0.9506
2824	3.22	3.32	49.8	sp|O43159|RRP8_HUMAN	Ribosomal RNA-processing protein 8 OS=Homo sapiens GN=RRP8 PE=1 SV=2	HUMAN	2	0.8326	0.832	0.663	0.9506
2477	4.05	4.56	24.3	sp|Q96DX4|RSPRY_HUMAN	RING finger and SPRY domain-containing protein 1 OS=Homo sapiens GN=RSPRY1 PE=2 SV=1	HUMAN	2	0.8326	0.9325	1.3889	0.9507
1542	8.38	9.01	45.8	sp|Q99747|SNAG_HUMAN	Gamma-soluble NSF attachment protein OS=Homo sapiens GN=NAPG PE=1 SV=1	HUMAN	5	0.8327	1.1301	0.7081	0.951
341	28.25	29.78	57.5	sp|O76094|SRP72_HUMAN	Signal recognition particle 72 kDa protein OS=Homo sapiens GN=SRP72 PE=1 SV=3	HUMAN	21	0.8328	0.9643	0.8793	0.951
3633	2	2.05	36.8	sp|Q9UKM7|MA1B1_HUMAN	Endoplasmic reticulum mannosyl-oligosaccharide 1,2-alpha-mannosidase OS=Homo sapiens GN=MAN1B1 PE=1 SV=2	HUMAN	1	0.8328	0.9643	1.0061	0.9513
784	16.63	17.82	54.5	sp|Q00059|TFAM_HUMAN	Transcription factor A, mitochondrial OS=Homo sapiens GN=TFAM PE=1 SV=1	HUMAN	12	0.8329	0.963	0.8507	0.9514
868	15.24	15.31	56.3	sp|P78406|RAE1L_HUMAN	mRNA export factor OS=Homo sapiens GN=RAE1 PE=1 SV=1	HUMAN	15	0.8329	1.0622	0.8815	0.9515
396	26.12	28.38	45.7	sp|Q99613|EIF3C_HUMAN	Eukaryotic translation initiation factor 3 subunit C OS=Homo sapiens GN=EIF3C PE=1 SV=1	HUMAN	21	0.8332	0.9324	0.816	0.9515
1737	7.31	7.38	29.1	sp|P04818|TYSY_HUMAN	Thymidylate synthase OS=Homo sapiens GN=TYMS PE=1 SV=3	HUMAN	8	0.8333	0.895	0.8391	0.9516
3340	2.02	2.03	32.4	sp|P36405|ARL3_HUMAN	ADP-ribosylation factor-like protein 3 OS=Homo sapiens GN=ARL3 PE=1 SV=2	HUMAN	1	0.8334	1.0352	0.9472	0.9518
103	56.3	57.25	85.5	sp|P40926|MDHM_HUMAN	Malate dehydrogenase, mitochondrial OS=Homo sapiens GN=MDH2 PE=1 SV=3	HUMAN	75	0.8335	0.9899	0.8767	0.9519
1785	6.97	7.03	30.6	sp|Q7Z739|YTHD3_HUMAN	YTH domain family protein 3 OS=Homo sapiens GN=YTHDF3 PE=1 SV=1	HUMAN	3	0.8336	1.0495	0.9465	0.952
3215	2.07	2.07	38.6	sp|Q9Y5J9|TIM8B_HUMAN	Mitochondrial import inner membrane translocase subunit Tim8 B OS=Homo sapiens GN=TIMM8B PE=1 SV=1	HUMAN	1	0.8338	0.9396	0.6466	0.9521
149	46.44	50.06	55.8	sp|P50570|DYN2_HUMAN	Dynamin-2 OS=Homo sapiens GN=DNM2 PE=1 SV=2	HUMAN	33	0.8339	0.8933	0.7885	0.9521
2805	3.29	4.49	37	sp|Q8IYB7|DI3L2_HUMAN	DIS3-like exonuclease 2 OS=Homo sapiens GN=DIS3L2 PE=1 SV=4	HUMAN	3	0.8339	1.2053	0.7647	0.9521
3285	2.03	2.12	23.2	sp|P53365|ARFP2_HUMAN	Arfaptin-2 OS=Homo sapiens GN=ARFIP2 PE=1 SV=1	HUMAN	1	0.8339	0.499	16.1077	0.9521
55	73.76	74.24	58.7	sp|P22314|UBA1_HUMAN	Ubiquitin-like modifier-activating enzyme 1 OS=Homo sapiens GN=UBA1 PE=1 SV=3	HUMAN	67	0.834	0.9933	0.8537	0.9523
732	17.47	17.47	75.8	sp|O00161|SNP23_HUMAN	Synaptosomal-associated protein 23 OS=Homo sapiens GN=SNAP23 PE=1 SV=1	HUMAN	10	0.8341	0.8977	0.8287	0.9523
47	79.42	83.27	73.4	sp|P06737|PYGL_HUMAN	Glycogen phosphorylase, liver form OS=Homo sapiens GN=PYGL PE=1 SV=4	HUMAN	64	0.8341	0.9935	0.8773	0.9523
2811	3.26	3.26	67.9	sp|P62273|RS29_HUMAN	40S ribosomal protein S29 OS=Homo sapiens GN=RPS29 PE=1 SV=2	HUMAN	3	0.8342	1.0891	0.7391	0.9524
2649	4	4.01	28	sp|P10153|RNAS2_HUMAN	Non-secretory ribonuclease OS=Homo sapiens GN=RNASE2 PE=1 SV=2	HUMAN	5	0.8342	0.9589	0.9104	0.9526
336	28.62	28.87	81.5	sp|P62249|RS16_HUMAN	40S ribosomal protein S16 OS=Homo sapiens GN=RPS16 PE=1 SV=2	HUMAN	20	0.8343	0.9845	0.8949	0.9526
1005	13.52	14.15	57.3	sp|Q9Y2X3|NOP58_HUMAN	Nucleolar protein 58 OS=Homo sapiens GN=NOP58 PE=1 SV=1	HUMAN	12	0.8343	0.9798	0.9006	0.9527
35	85.29	92.25	55.6	sp|O75369|FLNB_HUMAN	Filamin-B OS=Homo sapiens GN=FLNB PE=1 SV=2	HUMAN	68	0.8344	0.9764	0.8533	0.9528
129	50.07	52.7	46.6	sp|Q92900|RENT1_HUMAN	Regulator of nonsense transcripts 1 OS=Homo sapiens GN=UPF1 PE=1 SV=2	HUMAN	42	0.8345	0.9412	0.8927	0.9528
1728	7.36	7.5	66.4	sp|P36543|VATE1_HUMAN	V-type proton ATPase subunit E 1 OS=Homo sapiens GN=ATP6V1E1 PE=1 SV=1	HUMAN	7	0.8346	0.9255	0.9128	0.9529
589	20.28	20.46	68.9	sp|Q15008|PSMD6_HUMAN	26S proteasome non-ATPase regulatory subunit 6 OS=Homo sapiens GN=PSMD6 PE=1 SV=1	HUMAN	14	0.8346	1.0232	0.8596	0.9529
722	17.61	18.27	42	sp|Q92797|SYMPK_HUMAN	Symplekin OS=Homo sapiens GN=SYMPK PE=1 SV=2	HUMAN	10	0.8347	1.1836	0.8492	0.953
3406	2.01	2.21	19.5	sp|Q8N9N2|ASCC1_HUMAN	Activating signal cointegrator 1 complex subunit 1 OS=Homo sapiens GN=ASCC1 PE=1 SV=1	HUMAN	1	0.8348	0.9959	0.8422	0.953
3094	2.25	3.72	27.9	sp|Q7Z6I6|RHG30_HUMAN	Rho GTPase-activating protein 30 OS=Homo sapiens GN=ARHGAP30 PE=1 SV=3	HUMAN	3	0.8348	1.1648	0.8826	0.953
1516	8.55	9	59.8	sp|Q6UX04|CWC27_HUMAN	Peptidyl-prolyl cis-trans isomerase CWC27 homolog OS=Homo sapiens GN=CWC27 PE=1 SV=1	HUMAN	5	0.8349	0.9423	0.8427	0.9533
834	15.71	15.77	41.3	sp|P53597|SUCA_HUMAN	Succinyl-CoA ligase [ADP/GDP-forming] subunit alpha, mitochondrial OS=Homo sapiens GN=SUCLG1 PE=1 SV=4	HUMAN	10	0.835	0.9609	0.881	0.9534
168	43.68	45.25	46.7	sp|P05023|AT1A1_HUMAN	Sodium/potassium-transporting ATPase subunit alpha-1 OS=Homo sapiens GN=ATP1A1 PE=1 SV=1	HUMAN	32	0.8351	0.9433	0.8553	0.9534
765	17.05	17.23	34.4	sp|Q8WWM7|ATX2L_HUMAN	Ataxin-2-like protein OS=Homo sapiens GN=ATXN2L PE=1 SV=2	HUMAN	11	0.8352	0.9864	0.8744	0.9535
762	17.1	19.68	47.7	sp|Q8WU90|ZC3HF_HUMAN	Zinc finger CCCH domain-containing protein 15 OS=Homo sapiens GN=ZC3H15 PE=1 SV=1	HUMAN	13	0.8352	1.0892	0.7938	0.9535
2078	5.92	15.42	54.4	sp|P62879|GBB2_HUMAN	Guanine nucleotide-binding protein G(I)/G(S)/G(T) subunit beta-2 OS=Homo sapiens GN=GNB2 PE=1 SV=3	HUMAN	12	0.8352	1.0559	0.8761	0.9536
3194	2.09	2.12	31.8	sp|O95168|NDUB4_HUMAN	NADH dehydrogenase [ubiquinone] 1 beta subcomplex subunit 4 OS=Homo sapiens GN=NDUFB4 PE=1 SV=3	HUMAN	1	0.8352	1.2019	0.8495	0.9536
3154	2.14	2.27	35.4	sp|P17706|PTN2_HUMAN	Tyrosine-protein phosphatase non-receptor type 2 OS=Homo sapiens GN=PTPN2 PE=1 SV=2	HUMAN	2	0.8353	0.7083	0.8844	0.9537
706	17.96	18.02	75.3	sp|P22061|PIMT_HUMAN	Protein-L-isoaspartate(D-aspartate) O-methyltransferase OS=Homo sapiens GN=PCMT1 PE=1 SV=4	HUMAN	14	0.8353	1.0106	0.8601	0.9539
230	37.56	39.57	44.7	sp|Q14008|CKAP5_HUMAN	Cytoskeleton-associated protein 5 OS=Homo sapiens GN=CKAP5 PE=1 SV=3	HUMAN	22	0.8354	0.9378	0.8426	0.9543
267	34.23	34.72	61	sp|P42166|LAP2A_HUMAN	Lamina-associated polypeptide 2, isoform alpha OS=Homo sapiens GN=TMPO PE=1 SV=2	HUMAN	38	0.8354	0.9298	0.9275	0.9543
380	26.62	29.84	50	sp|Q14151|SAFB2_HUMAN	Scaffold attachment factor B2 OS=Homo sapiens GN=SAFB2 PE=1 SV=1	HUMAN	15	0.8355	0.9155	1.0279	0.9545
3738	2	2	47.2	sp|Q9Y2R0|COA3_HUMAN	Cytochrome C oxidase assembly factor 3 homolog, mitochondrial OS=Homo sapiens GN=COA3 PE=1 SV=1	HUMAN	1	0.8356	0.9954	0.7655	0.9545
1697	7.59	7.95	31.9	sp|A4D1P6|WDR91_HUMAN	WD repeat-containing protein 91 OS=Homo sapiens GN=WDR91 PE=1 SV=2	HUMAN	5	0.8356	0.9781	0.867	0.9546
1347	10.01	10.1	28.6	sp|P35613|BASI_HUMAN	Basigin OS=Homo sapiens GN=BSG PE=1 SV=2	HUMAN	8	0.8358	0.9512	0.8474	0.9549
2528	4.01	6.4	51.9	sp|P60891|PRPS1_HUMAN	Ribose-phosphate pyrophosphokinase 1 OS=Homo sapiens GN=PRPS1 PE=1 SV=2	HUMAN	5	0.8358	0.9471	0.8481	0.9549
585	20.33	25.22	58.9	sp|P62195|PRS8_HUMAN	26S protease regulatory subunit 8 OS=Homo sapiens GN=PSMC5 PE=1 SV=1	HUMAN	19	0.8358	0.939	0.8864	0.955
789	16.57	16.84	37.7	sp|O15355|PPM1G_HUMAN	Protein phosphatase 1G OS=Homo sapiens GN=PPM1G PE=1 SV=1	HUMAN	15	0.8358	1.0076	0.8469	0.9551
792	16.54	18.96	64.7	sp|Q99986|VRK1_HUMAN	Serine/threonine-protein kinase VRK1 OS=Homo sapiens GN=VRK1 PE=1 SV=1	HUMAN	12	0.8362	0.9247	0.9233	0.9552
2199	5.2	5.76	34.1	sp|Q96SB4|SRPK1_HUMAN	SRSF protein kinase 1 OS=Homo sapiens GN=SRPK1 PE=1 SV=2	HUMAN	6	0.8363	0.8494	0.8415	0.9554
3008	2.47	2.72	33.7	sp|Q96H20|SNF8_HUMAN	Vacuolar-sorting protein SNF8 OS=Homo sapiens GN=SNF8 PE=1 SV=1	HUMAN	2	0.8363	0.6844	1.0825	0.9554
394	26.15	27.79	36.7	sp|Q6PL18|ATAD2_HUMAN	ATPase family AAA domain-containing protein 2 OS=Homo sapiens GN=ATAD2 PE=1 SV=1	HUMAN	14	0.8363	0.9676	0.8586	0.9557
3137	2.17	2.26	30.4	sp|P13051|UNG_HUMAN	Uracil-DNA glycosylase OS=Homo sapiens GN=UNG PE=1 SV=2	HUMAN	2	0.8364	1.0981	0.6872	0.9558
854	15.46	15.65	66.3	sp|Q16698|DECR_HUMAN	2,4-dienoyl-CoA reductase, mitochondrial OS=Homo sapiens GN=DECR1 PE=1 SV=1	HUMAN	16	0.8364	1.0129	0.8759	0.9558
2290	4.75	4.87	50	sp|O43633|CHM2A_HUMAN	Charged multivesicular body protein 2a OS=Homo sapiens GN=CHMP2A PE=1 SV=1	HUMAN	4	0.8365	0.8989	0.8535	0.9559
2834	3.15	3.24	24.6	sp|Q9C0C2|TB182_HUMAN	182 kDa tankyrase-1-binding protein OS=Homo sapiens GN=TNKS1BP1 PE=1 SV=4	HUMAN	2	0.8368	0.7553	0.9217	0.9559
1051	12.96	13.06	39.4	sp|Q9BTE3|MCMBP_HUMAN	Mini-chromosome maintenance complex-binding protein OS=Homo sapiens GN=MCMBP PE=1 SV=2	HUMAN	7	0.8368	0.8887	0.8652	0.956
50	77.6	79.59	54.1	sp|P46940|IQGA1_HUMAN	Ras GTPase-activating-like protein IQGAP1 OS=Homo sapiens GN=IQGAP1 PE=1 SV=1	HUMAN	79	0.8368	0.9727	0.8432	0.956
3197	2.08	2.62	29.5	sp|Q13111|CAF1A_HUMAN	Chromatin assembly factor 1 subunit A OS=Homo sapiens GN=CHAF1A PE=1 SV=2	HUMAN	1	0.837	0.804	0.6873	0.956
1082	12.53	12.65	51.9	sp|Q9UKD2|MRT4_HUMAN	mRNA turnover protein 4 homolog OS=Homo sapiens GN=MRTO4 PE=1 SV=2	HUMAN	8	0.8372	1.1051	0.8309	0.956
991	13.61	17.51	56.8	sp|Q08752|PPID_HUMAN	Peptidyl-prolyl cis-trans isomerase D OS=Homo sapiens GN=PPID PE=1 SV=3	HUMAN	11	0.8374	0.9476	0.8164	0.9564
45	80.57	81.5	51.3	sp|Q6P2Q9|PRP8_HUMAN	Pre-mRNA-processing-splicing factor 8 OS=Homo sapiens GN=PRPF8 PE=1 SV=2	HUMAN	76	0.8374	0.9514	0.8618	0.9566
4993	0.05	0.08	17.4	RRRRRsp|P56159|GFRA1_HUMAN	REVERSED GDNF family receptor alpha-1 OS=Homo sapiens GN=GFRA1 PE=2 SV=2	HUMAN	0	0.8375	0.8722	0.9045	0.9567
2032	6	6.87	45.1	sp|Q02127|PYRD_HUMAN	Dihydroorotate dehydrogenase (quinone), mitochondrial OS=Homo sapiens GN=DHODH PE=1 SV=3	HUMAN	4	0.8376	0.9404	0.8422	0.9567
1439	9.23	10.97	51.7	sp|Q86TU7|SETD3_HUMAN	Histone-lysine N-methyltransferase setd3 OS=Homo sapiens GN=SETD3 PE=1 SV=1	HUMAN	5	0.8378	1.0067	0.7961	0.9568
2794	3.36	3.76	35.8	sp|P18074|ERCC2_HUMAN	TFIIH basal transcription factor complex helicase XPD subunit OS=Homo sapiens GN=ERCC2 PE=1 SV=1	HUMAN	2	0.838	0.829	0.7693	0.9569
1292	10.35	12.4	29.6	sp|Q99570|PI3R4_HUMAN	Phosphoinositide 3-kinase regulatory subunit 4 OS=Homo sapiens GN=PIK3R4 PE=1 SV=3	HUMAN	7	0.838	0.8262	0.849	0.9571
1403	9.57	9.64	62.3	sp|Q04323|UBXN1_HUMAN	UBX domain-containing protein 1 OS=Homo sapiens GN=UBXN1 PE=1 SV=2	HUMAN	5	0.838	0.9523	0.8021	0.9571
645	18.95	19.44	61.3	sp|P62495|ERF1_HUMAN	Eukaryotic peptide chain release factor subunit 1 OS=Homo sapiens GN=ETF1 PE=1 SV=3	HUMAN	12	0.838	0.9341	0.8852	0.9571
1378	9.79	11.62	48.8	sp|Q6ZMZ3|SYNE3_HUMAN	Nesprin-3 OS=Homo sapiens GN=SYNE3 PE=1 SV=2	HUMAN	6	0.8382	0.8896	0.962	0.9572
472	23.22	23.65	55.1	sp|P49591|SYSC_HUMAN	Serine--tRNA ligase, cytoplasmic OS=Homo sapiens GN=SARS PE=1 SV=3	HUMAN	18	0.8382	0.9435	0.9242	0.9572
959	14.02	15.91	25.6	sp|Q9Y613|FHOD1_HUMAN	FH1/FH2 domain-containing protein 1 OS=Homo sapiens GN=FHOD1 PE=1 SV=3	HUMAN	7	0.8383	0.9267	0.8668	0.9573
93	58.93	61	61.3	sp|Q15459|SF3A1_HUMAN	Splicing factor 3A subunit 1 OS=Homo sapiens GN=SF3A1 PE=1 SV=1	HUMAN	37	0.8383	0.9779	0.8523	0.9573
805	16.36	16.82	67.4	sp|P00492|HPRT_HUMAN	Hypoxanthine-guanine phosphoribosyltransferase OS=Homo sapiens GN=HPRT1 PE=1 SV=2	HUMAN	9	0.8384	0.9865	0.8898	0.9574
16	113.07	114.51	61.8	sp|P12270|TPR_HUMAN	Nucleoprotein TPR OS=Homo sapiens GN=TPR PE=1 SV=3	HUMAN	79	0.8385	0.9721	0.8702	0.9575
1851	6.54	6.58	43.4	sp|Q9NR31|SAR1A_HUMAN	GTP-binding protein SAR1a OS=Homo sapiens GN=SAR1A PE=1 SV=1	HUMAN	7	0.8386	0.978	0.8523	0.9576
562	20.87	21.28	78.7	sp|P47756|CAPZB_HUMAN	F-actin-capping protein subunit beta OS=Homo sapiens GN=CAPZB PE=1 SV=4	HUMAN	30	0.8386	0.9577	0.8767	0.9576
578	20.45	20.72	85.7	sp|P10599|THIO_HUMAN	Thioredoxin OS=Homo sapiens GN=TXN PE=1 SV=3	HUMAN	15	0.8386	0.9709	0.9104	0.9577
477	23.06	25.59	54.5	sp|Q8WXF1|PSPC1_HUMAN	Paraspeckle component 1 OS=Homo sapiens GN=PSPC1 PE=1 SV=1	HUMAN	21	0.8387	1.0272	0.8844	0.9577
1850	6.54	10.34	37.4	sp|Q13136|LIPA1_HUMAN	Liprin-alpha-1 OS=Homo sapiens GN=PPFIA1 PE=1 SV=1	HUMAN	5	0.8387	1.105	0.8943	0.9579
480	23.03	23.08	56.8	sp|Q01518|CAP1_HUMAN	Adenylyl cyclase-associated protein 1 OS=Homo sapiens GN=CAP1 PE=1 SV=5	HUMAN	24	0.8391	0.9343	0.8639	0.9579
141	47.38	51.45	64.5	sp|Q15029|U5S1_HUMAN	116 kDa U5 small nuclear ribonucleoprotein component OS=Homo sapiens GN=EFTUD2 PE=1 SV=1	HUMAN	28	0.8394	0.9475	0.8307	0.958
1229	10.89	11.42	34.6	sp|Q8IXT5|RB12B_HUMAN	RNA-binding protein 12B OS=Homo sapiens GN=RBM12B PE=1 SV=2	HUMAN	6	0.8394	0.9526	0.9858	0.9581
875	15.16	15.79	47.8	sp|P36551|HEM6_HUMAN	Coproporphyrinogen-III oxidase, mitochondrial OS=Homo sapiens GN=CPOX PE=1 SV=3	HUMAN	10	0.8395	0.889	0.8837	0.9582
4209	0.45	0.48	42.6	sp|Q5VUM1|CF057_HUMAN	UPF0369 protein C6orf57 OS=Homo sapiens GN=C6orf57 PE=2 SV=1	HUMAN	1	0.8396	0.949	0.8882	0.9583
1202	11.28	26.5	89	sp|P22090|RS4Y1_HUMAN	40S ribosomal protein S4, Y isoform 1 OS=Homo sapiens GN=RPS4Y1 PE=2 SV=2	HUMAN	22	0.8396	0.9524	0.8921	0.9585
2104	5.77	6.06	59.1	sp|Q9BYC9|RM20_HUMAN	39S ribosomal protein L20, mitochondrial OS=Homo sapiens GN=MRPL20 PE=1 SV=1	HUMAN	3	0.8396	0.9151	0.9512	0.9586
536	21.33	22.07	89.1	sp|P30050|RL12_HUMAN	60S ribosomal protein L12 OS=Homo sapiens GN=RPL12 PE=1 SV=1	HUMAN	22	0.8396	0.9804	0.8931	0.9587
2775	3.44	3.51	27.6	sp|P15104|GLNA_HUMAN	Glutamine synthetase OS=Homo sapiens GN=GLUL PE=1 SV=4	HUMAN	2	0.8397	0.9036	0.7197	0.9588
3071	2.3	5.2	34.3	sp|Q9H501|ESF1_HUMAN	ESF1 homolog OS=Homo sapiens GN=ESF1 PE=1 SV=1	HUMAN	2	0.8397	0.7437	0.8901	0.9588
194	41	42.48	67.7	sp|P35998|PRS7_HUMAN	26S protease regulatory subunit 7 OS=Homo sapiens GN=PSMC2 PE=1 SV=3	HUMAN	22	0.8397	0.9428	0.921	0.9589
354	27.62	29.29	44.2	sp|O00267|SPT5H_HUMAN	Transcription elongation factor SPT5 OS=Homo sapiens GN=SUPT5H PE=1 SV=1	HUMAN	18	0.8397	0.9654	0.9536	0.959
500	22.36	25.03	54.8	sp|Q9NZI8|IF2B1_HUMAN	Insulin-like growth factor 2 mRNA-binding protein 1 OS=Homo sapiens GN=IGF2BP1 PE=1 SV=2	HUMAN	16	0.8398	0.9844	0.8292	0.9593
83	62.61	62.74	63.7	sp|Q92841|DDX17_HUMAN	Probable ATP-dependent RNA helicase DDX17 OS=Homo sapiens GN=DDX17 PE=1 SV=2	HUMAN	46	0.8399	0.938	0.8577	0.9593
506	22.24	23.11	52.1	sp|Q12874|SF3A3_HUMAN	Splicing factor 3A subunit 3 OS=Homo sapiens GN=SF3A3 PE=1 SV=1	HUMAN	17	0.8399	1.0405	0.8152	0.9594
1359	9.96	10.37	47.8	sp|P82650|RT22_HUMAN	28S ribosomal protein S22, mitochondrial OS=Homo sapiens GN=MRPS22 PE=1 SV=1	HUMAN	5	0.84	0.9488	0.9181	0.9596
3503	2	2.4	27.1	sp|P06213|INSR_HUMAN	Insulin receptor OS=Homo sapiens GN=INSR PE=1 SV=4	HUMAN	1	0.8401	1.3047	0.6346	0.9597
316	29.8	30.22	69.1	sp|Q96KP4|CNDP2_HUMAN	Cytosolic non-specific dipeptidase OS=Homo sapiens GN=CNDP2 PE=1 SV=2	HUMAN	26	0.8401	1.0367	0.877	0.96
3110	2.21	2.23	47.5	sp|P17568|NDUB7_HUMAN	NADH dehydrogenase [ubiquinone] 1 beta subcomplex subunit 7 OS=Homo sapiens GN=NDUFB7 PE=1 SV=4	HUMAN	2	0.8402	0.7338	0.8722	0.96
1536	8.44	8.49	93.2	sp|Q15370|ELOB_HUMAN	Transcription elongation factor B polypeptide 2 OS=Homo sapiens GN=TCEB2 PE=1 SV=1	HUMAN	7	0.8402	1.0042	0.8679	0.9601
627	19.51	19.78	68.3	sp|O95433|AHSA1_HUMAN	Activator of 90 kDa heat shock protein ATPase homolog 1 OS=Homo sapiens GN=AHSA1 PE=1 SV=1	HUMAN	19	0.8403	0.9596	0.8608	0.9601
1782	6.98	8.05	37.6	sp|O75439|MPPB_HUMAN	Mitochondrial-processing peptidase subunit beta OS=Homo sapiens GN=PMPCB PE=1 SV=2	HUMAN	4	0.8408	0.8493	0.9056	0.9601
3085	2.27	2.57	41.1	sp|Q9Y3P9|RBGP1_HUMAN	Rab GTPase-activating protein 1 OS=Homo sapiens GN=RABGAP1 PE=1 SV=3	HUMAN	2	0.8409	0.8291	0.8944	0.9601
148	46.66	49.08	54.5	sp|Q9Y4L1|HYOU1_HUMAN	Hypoxia up-regulated protein 1 OS=Homo sapiens GN=HYOU1 PE=1 SV=1	HUMAN	37	0.8409	1.0744	0.7959	0.9601
73	65.72	66.14	83.6	sp|P06576|ATPB_HUMAN	ATP synthase subunit beta, mitochondrial OS=Homo sapiens GN=ATP5B PE=1 SV=3	HUMAN	98	0.841	0.9778	0.8604	0.9602
895	14.86	17.88	51.5	sp|P18858|DNLI1_HUMAN	DNA ligase 1 OS=Homo sapiens GN=LIG1 PE=1 SV=1	HUMAN	9	0.8411	1.0489	0.7888	0.9603
2254	4.92	5.21	35.5	sp|P52756|RBM5_HUMAN	RNA-binding protein 5 OS=Homo sapiens GN=RBM5 PE=1 SV=2	HUMAN	3	0.8411	1.0559	1.0277	0.9603
1636	8	8.02	64.7	sp|P63027|VAMP2_HUMAN	Vesicle-associated membrane protein 2 OS=Homo sapiens GN=VAMP2 PE=1 SV=3	HUMAN	5	0.8412	0.9478	0.8473	0.9604
607	19.82	22.58	41.6	sp|Q9UIG0|BAZ1B_HUMAN	Tyrosine-protein kinase BAZ1B OS=Homo sapiens GN=BAZ1B PE=1 SV=2	HUMAN	12	0.8413	0.9547	0.8602	0.9604
483	22.95	23.04	87.4	sp|P51149|RAB7A_HUMAN	Ras-related protein Rab-7a OS=Homo sapiens GN=RAB7A PE=1 SV=1	HUMAN	19	0.8413	0.9035	0.9066	0.9605
253	35.84	38.71	85.1	sp|Q15365|PCBP1_HUMAN	Poly(rC)-binding protein 1 OS=Homo sapiens GN=PCBP1 PE=1 SV=2	HUMAN	42	0.8414	0.9203	0.8387	0.9608
509	22.14	22.97	63.1	sp|P38117|ETFB_HUMAN	Electron transfer flavoprotein subunit beta OS=Homo sapiens GN=ETFB PE=1 SV=3	HUMAN	15	0.8414	1.0205	0.8508	0.9608
3469	2	9	58.6	sp|Q96BM9|ARL8A_HUMAN	ADP-ribosylation factor-like protein 8A OS=Homo sapiens GN=ARL8A PE=1 SV=1	HUMAN	5	0.8418	0.8194	0.936	0.9608
1836	6.65	6.67	67.4	sp|Q9P0J0|NDUAD_HUMAN	NADH dehydrogenase [ubiquinone] 1 alpha subcomplex subunit 13 OS=Homo sapiens GN=NDUFA13 PE=1 SV=3	HUMAN	5	0.8419	0.949	0.7985	0.9608
2331	4.52	4.58	74.2	sp|Q8WZA0|LZIC_HUMAN	Protein LZIC OS=Homo sapiens GN=LZIC PE=1 SV=1	HUMAN	2	0.8419	0.934	0.802	0.9608
459	23.56	24.03	66.8	sp|Q9UBE0|SAE1_HUMAN	SUMO-activating enzyme subunit 1 OS=Homo sapiens GN=SAE1 PE=1 SV=1	HUMAN	21	0.8419	1.0184	0.7998	0.9609
407	25.67	27.12	78	sp|O15144|ARPC2_HUMAN	Actin-related protein 2/3 complex subunit 2 OS=Homo sapiens GN=ARPC2 PE=1 SV=1	HUMAN	22	0.8419	0.9766	0.9228	0.9609
1883	6.37	6.78	29.1	sp|A3KN83|SBNO1_HUMAN	Protein strawberry notch homolog 1 OS=Homo sapiens GN=SBNO1 PE=1 SV=1	HUMAN	4	0.8419	1.0295	0.8793	0.961
1684	7.69	7.79	50.6	sp|P63279|UBC9_HUMAN	SUMO-conjugating enzyme UBC9 OS=Homo sapiens GN=UBE2I PE=1 SV=1	HUMAN	6	0.8421	0.9591	0.7847	0.9611
288	31.79	32.45	59.3	sp|P21281|VATB2_HUMAN	V-type proton ATPase subunit B, brain isoform OS=Homo sapiens GN=ATP6V1B2 PE=1 SV=3	HUMAN	34	0.8421	0.9604	0.8664	0.9611
594	20.2	20.38	85.1	sp|O00299|CLIC1_HUMAN	Chloride intracellular channel protein 1 OS=Homo sapiens GN=CLIC1 PE=1 SV=4	HUMAN	21	0.8422	1.04	0.7956	0.9611
190	42.05	42.45	81.6	sp|P62805|H4_HUMAN	Histone H4 OS=Homo sapiens GN=HIST1H4A PE=1 SV=2	HUMAN	83	0.8422	0.9899	0.8726	0.9611
286	32.3	32.55	49.8	sp|O75390|CISY_HUMAN	Citrate synthase, mitochondrial OS=Homo sapiens GN=CS PE=1 SV=2	HUMAN	22	0.8422	0.9805	0.9111	0.9612
3023	2.43	2.64	39.9	sp|Q9Y228|T3JAM_HUMAN	TRAF3-interacting JNK-activating modulator OS=Homo sapiens GN=TRAF3IP3 PE=1 SV=2	HUMAN	2	0.8423	1.1418	0.6599	0.9613
1923	6.19	7.06	18.1	sp|Q71RC2|LARP4_HUMAN	La-related protein 4 OS=Homo sapiens GN=LARP4 PE=1 SV=3	HUMAN	3	0.8424	0.7938	0.7702	0.9613
209	39.61	40.52	60.9	sp|P18206|VINC_HUMAN	Vinculin OS=Homo sapiens GN=VCL PE=1 SV=4	HUMAN	27	0.8424	0.9629	0.8566	0.9613
1102	12.33	12.36	50.8	sp|Q9NQP4|PFD4_HUMAN	Prefoldin subunit 4 OS=Homo sapiens GN=PFDN4 PE=1 SV=1	HUMAN	8	0.8425	1.0189	0.848	0.9613
1108	12.28	12.37	41.8	sp|P16930|FAAA_HUMAN	Fumarylacetoacetase OS=Homo sapiens GN=FAH PE=1 SV=2	HUMAN	10	0.8426	1.0094	0.8875	0.9613
2819	3.23	3.61	34.9	sp|P55211|CASP9_HUMAN	Caspase-9 OS=Homo sapiens GN=CASP9 PE=1 SV=3	HUMAN	2	0.8428	0.9004	0.871	0.9614
1786	6.95	7.33	39.7	sp|P82933|RT09_HUMAN	28S ribosomal protein S9, mitochondrial OS=Homo sapiens GN=MRPS9 PE=1 SV=2	HUMAN	6	0.8429	1.0558	0.7801	0.9615
636	19.25	20.87	47.2	sp|Q14289|FAK2_HUMAN	Protein-tyrosine kinase 2-beta OS=Homo sapiens GN=PTK2B PE=1 SV=2	HUMAN	10	0.843	1.0318	0.8444	0.9615
1984	6.05	6.07	81.1	sp|Q9Y333|LSM2_HUMAN	U6 snRNA-associated Sm-like protein LSm2 OS=Homo sapiens GN=LSM2 PE=1 SV=1	HUMAN	5	0.8432	0.8306	1.0324	0.9615
795	16.52	17.41	65.6	sp|P15153|RAC2_HUMAN	Ras-related C3 botulinum toxin substrate 2 OS=Homo sapiens GN=RAC2 PE=1 SV=1	HUMAN	10	0.8433	0.9379	0.8446	0.9615
20	101.92	102.63	75.5	sp|O43707|ACTN4_HUMAN	Alpha-actinin-4 OS=Homo sapiens GN=ACTN4 PE=1 SV=2	HUMAN	122	0.8433	0.9746	0.8775	0.9616
1222	11.02	11.17	63.1	sp|Q9BYG3|MK67I_HUMAN	MKI67 FHA domain-interacting nucleolar phosphoprotein OS=Homo sapiens GN=MKI67IP PE=1 SV=1	HUMAN	10	0.8434	1.0117	0.8777	0.9619
590	20.27	20.7	63.9	sp|P30740|ILEU_HUMAN	Leukocyte elastase inhibitor OS=Homo sapiens GN=SERPINB1 PE=1 SV=1	HUMAN	19	0.8435	0.983	0.8636	0.962
1762	7.14	7.32	51.9	sp|P49407|ARRB1_HUMAN	Beta-arrestin-1 OS=Homo sapiens GN=ARRB1 PE=1 SV=2	HUMAN	4	0.8436	0.9239	0.8684	0.962
1144	12	12.25	56.7	sp|P19105|ML12A_HUMAN	Myosin regulatory light chain 12A OS=Homo sapiens GN=MYL12A PE=1 SV=2	HUMAN	13	0.8437	0.9949	0.8237	0.962
121	51.59	52.97	70	sp|P04843|RPN1_HUMAN	Dolichyl-diphosphooligosaccharide--protein glycosyltransferase subunit 1 OS=Homo sapiens GN=RPN1 PE=1 SV=1	HUMAN	48	0.8437	0.9442	0.9354	0.962
1743	7.29	7.34	56.3	sp|P42574|CASP3_HUMAN	Caspase-3 OS=Homo sapiens GN=CASP3 PE=1 SV=2	HUMAN	6	0.8439	1.1364	0.776	0.9622
2491	4.04	4.45	24.1	sp|Q9UPN9|TRI33_HUMAN	E3 ubiquitin-protein ligase TRIM33 OS=Homo sapiens GN=TRIM33 PE=1 SV=3	HUMAN	3	0.844	1.1052	0.7169	0.9622
1149	11.95	14.48	61.2	sp|Q13185|CBX3_HUMAN	Chromobox protein homolog 3 OS=Homo sapiens GN=CBX3 PE=1 SV=4	HUMAN	12	0.844	1.0977	0.8954	0.9622
2460	4.08	4.25	20.9	sp|Q9UBB6|NCDN_HUMAN	Neurochondrin OS=Homo sapiens GN=NCDN PE=1 SV=1	HUMAN	2	0.844	1.0511	1.1035	0.9623
2668	3.92	3.93	38.8	sp|Q9Y530|CF130_HUMAN	O-acetyl-ADP-ribose deacetylase C6orf130 OS=Homo sapiens GN=C6orf130 PE=1 SV=2	HUMAN	3	0.8442	1.2869	0.8453	0.9623
63	69.22	70.5	64.6	sp|P49588|SYAC_HUMAN	Alanine--tRNA ligase, cytoplasmic OS=Homo sapiens GN=AARS PE=1 SV=2	HUMAN	56	0.8445	0.9842	0.8573	0.9623
201	40.03	41.29	87.9	sp|P18124|RL7_HUMAN	60S ribosomal protein L7 OS=Homo sapiens GN=RPL7 PE=1 SV=1	HUMAN	37	0.8447	1.0001	0.9144	0.9623
1168	11.61	11.94	58.1	sp|P36957|ODO2_HUMAN	Dihydrolipoyllysine-residue succinyltransferase component of 2-oxoglutarate dehydrogenase complex, mitochondrial OS=Homo sapiens GN=DLST PE=1 SV=4	HUMAN	10	0.8448	0.9652	0.884	0.9624
992	13.61	14.33	37.3	sp|Q96T23|RSF1_HUMAN	Remodeling and spacing factor 1 OS=Homo sapiens GN=RSF1 PE=1 SV=2	HUMAN	8	0.8448	1.2518	0.7451	0.9624
2019	6.01	6.39	54.8	sp|Q9Y450|HBS1L_HUMAN	HBS1-like protein OS=Homo sapiens GN=HBS1L PE=1 SV=1	HUMAN	5	0.8449	1.0007	0.7402	0.9626
721	17.61	18.34	48.9	sp|O75351|VPS4B_HUMAN	Vacuolar protein sorting-associated protein 4B OS=Homo sapiens GN=VPS4B PE=1 SV=2	HUMAN	11	0.8451	0.9513	0.8216	0.9627
2779	3.41	3.41	16.8	sp|P52655|TF2AA_HUMAN	Transcription initiation factor IIA subunit 1 OS=Homo sapiens GN=GTF2A1 PE=1 SV=1	HUMAN	2	0.8452	0.9983	0.9367	0.9628
2466	4.07	4.48	19.1	sp|Q9H0W9|CK054_HUMAN	Ester hydrolase C11orf54 OS=Homo sapiens GN=C11orf54 PE=1 SV=1	HUMAN	2	0.8453	0.8471	0.7149	0.9628
1735	7.33	7.43	82.2	sp|P26447|S10A4_HUMAN	Protein S100-A4 OS=Homo sapiens GN=S100A4 PE=1 SV=1	HUMAN	5	0.8453	1.0148	0.7813	0.9628
860	15.36	16.38	62.2	sp|P28066|PSA5_HUMAN	Proteasome subunit alpha type-5 OS=Homo sapiens GN=PSMA5 PE=1 SV=3	HUMAN	12	0.8454	0.9828	0.847	0.9628
2045	6	6.09	48.7	sp|O43924|PDE6D_HUMAN	Retinal rod rhodopsin-sensitive cGMP 3',5'-cyclic phosphodiesterase subunit delta OS=Homo sapiens GN=PDE6D PE=1 SV=1	HUMAN	3	0.8457	0.8744	0.9133	0.9632
363	27.28	28.51	45	sp|P05107|ITB2_HUMAN	Integrin beta-2 OS=Homo sapiens GN=ITGB2 PE=1 SV=2	HUMAN	16	0.8459	0.9853	0.8819	0.9632
3206	2.08	2.09	19.7	sp|Q9BPZ3|PAIP2_HUMAN	Polyadenylate-binding protein-interacting protein 2 OS=Homo sapiens GN=PAIP2 PE=1 SV=1	HUMAN	1	0.846	0.7857	0.9083	0.9633
2660	3.96	3.97	46.2	sp|O75394|RM33_HUMAN	39S ribosomal protein L33, mitochondrial OS=Homo sapiens GN=MRPL33 PE=1 SV=1	HUMAN	2	0.8461	1.0069	0.8165	0.9635
30	89.39	91.61	69.7	sp|P11586|C1TC_HUMAN	C-1-tetrahydrofolate synthase, cytoplasmic OS=Homo sapiens GN=MTHFD1 PE=1 SV=3	HUMAN	69	0.8461	1.0081	0.8514	0.9637
4099	0.7	0.78	30.4	sp|P98170|XIAP_HUMAN	E3 ubiquitin-protein ligase XIAP OS=Homo sapiens GN=XIAP PE=1 SV=2	HUMAN	1	0.8462	0.7732	1.0071	0.9637
1660	7.88	7.94	49.2	sp|P08574|CY1_HUMAN	Cytochrome c1, heme protein, mitochondrial OS=Homo sapiens GN=CYC1 PE=1 SV=3	HUMAN	13	0.8464	0.9854	0.8813	0.9638
71	66.43	68.72	62.2	sp|P09874|PARP1_HUMAN	Poly [ADP-ribose] polymerase 1 OS=Homo sapiens GN=PARP1 PE=1 SV=4	HUMAN	52	0.8464	1.0305	0.8939	0.9638
4112	0.66	3.1	24.5	sp|Q9H1B7|I2BPL_HUMAN	Interferon regulatory factor 2-binding protein-like OS=Homo sapiens GN=IRF2BPL PE=1 SV=1	HUMAN	4	0.8465	0.3505	0.8451	0.9638
225	37.97	39.96	38.6	sp|Q16531|DDB1_HUMAN	DNA damage-binding protein 1 OS=Homo sapiens GN=DDB1 PE=1 SV=1	HUMAN	29	0.8466	1.0118	0.8615	0.9638
2251	4.95	4.99	54.1	sp|P82930|RT34_HUMAN	28S ribosomal protein S34, mitochondrial OS=Homo sapiens GN=MRPS34 PE=1 SV=2	HUMAN	5	0.8466	1.0453	0.8535	0.9638
640	19.19	23.18	63.9	sp|P43686|PRS6B_HUMAN	26S protease regulatory subunit 6B OS=Homo sapiens GN=PSMC4 PE=1 SV=2	HUMAN	19	0.8467	1.0155	0.8377	0.9639
2371	4.35	4.56	22.2	sp|O60315|ZEB2_HUMAN	Zinc finger E-box-binding homeobox 2 OS=Homo sapiens GN=ZEB2 PE=1 SV=1	HUMAN	3	0.8467	1.0361	0.8596	0.9639
3228	2.05	5.24	40.1	sp|Q9ULI0|ATD2B_HUMAN	ATPase family AAA domain-containing protein 2B OS=Homo sapiens GN=ATAD2B PE=1 SV=3	HUMAN	3	0.8468	0.7763	0.8057	0.964
2836	3.15	3.16	44.2	sp|Q96BR5|SELR1_HUMAN	Sel1 repeat-containing protein 1 OS=Homo sapiens GN=SELRC1 PE=1 SV=2	HUMAN	4	0.8468	0.7227	1.1854	0.964
1746	7.26	8.35	52.7	sp|P55327|TPD52_HUMAN	Tumor protein D52 OS=Homo sapiens GN=TPD52 PE=1 SV=2	HUMAN	4	0.8471	1.0193	0.9828	0.964
4216	0.43	0.67	28.3	sp|P83881|RL36A_HUMAN	60S ribosomal protein L36a OS=Homo sapiens GN=RPL36A PE=1 SV=2	HUMAN	0	0.8471	0.9846	1.006	0.964
429	24.89	26.01	35.8	sp|Q709C8|VP13C_HUMAN	Vacuolar protein sorting-associated protein 13C OS=Homo sapiens GN=VPS13C PE=1 SV=1	HUMAN	15	0.8472	0.9455	0.8843	0.9641
1257	10.66	11.52	51.6	sp|Q96C86|DCPS_HUMAN	m7GpppX diphosphatase OS=Homo sapiens GN=DCPS PE=1 SV=2	HUMAN	7	0.8472	0.9718	0.8645	0.9641
406	25.74	26.38	60.8	sp|O94905|ERLN2_HUMAN	Erlin-2 OS=Homo sapiens GN=ERLIN2 PE=1 SV=1	HUMAN	17	0.8472	0.9586	0.9037	0.9641
3170	2.11	4.18	26.6	sp|Q9BVV7|TIM21_HUMAN	Mitochondrial import inner membrane translocase subunit Tim21 OS=Homo sapiens GN=TIMM21 PE=1 SV=1	HUMAN	2	0.8472	1.0907	0.8982	0.9641
1941	6.13	7.34	33.3	sp|Q9UJV9|DDX41_HUMAN	Probable ATP-dependent RNA helicase DDX41 OS=Homo sapiens GN=DDX41 PE=1 SV=2	HUMAN	5	0.8472	1.2498	0.8074	0.9641
685	18.24	18.69	68.9	sp|Q15785|TOM34_HUMAN	Mitochondrial import receptor subunit TOM34 OS=Homo sapiens GN=TOMM34 PE=1 SV=2	HUMAN	10	0.8477	0.9411	0.812	0.9643
631	19.34	20.09	52.3	sp|Q9Y2W1|TR150_HUMAN	Thyroid hormone receptor-associated protein 3 OS=Homo sapiens GN=THRAP3 PE=1 SV=2	HUMAN	14	0.8478	1.024	0.821	0.9644
364	27.27	28.56	43.7	sp|P08575|PTPRC_HUMAN	Receptor-type tyrosine-protein phosphatase C OS=Homo sapiens GN=PTPRC PE=1 SV=2	HUMAN	18	0.8479	0.9297	0.887	0.9644
453	24.04	25.31	68.8	sp|P13804|ETFA_HUMAN	Electron transfer flavoprotein subunit alpha, mitochondrial OS=Homo sapiens GN=ETFA PE=1 SV=1	HUMAN	19	0.8479	1.0338	0.8095	0.9644
393	26.15	28.83	69.5	sp|Q9Y295|DRG1_HUMAN	Developmentally-regulated GTP-binding protein 1 OS=Homo sapiens GN=DRG1 PE=1 SV=1	HUMAN	14	0.8479	0.9973	0.9015	0.9645
534	21.36	22.97	27.2	sp|P55060|XPO2_HUMAN	Exportin-2 OS=Homo sapiens GN=CSE1L PE=1 SV=3	HUMAN	12	0.848	0.9751	0.8083	0.9645
113	53.06	54.79	56.1	sp|Q14697|GANAB_HUMAN	Neutral alpha-glucosidase AB OS=Homo sapiens GN=GANAB PE=1 SV=3	HUMAN	56	0.848	0.9459	0.8924	0.9648
950	14.09	16.22	43.9	sp|O75489|NDUS3_HUMAN	NADH dehydrogenase [ubiquinone] iron-sulfur protein 3, mitochondrial OS=Homo sapiens GN=NDUFS3 PE=1 SV=1	HUMAN	12	0.848	0.9561	0.8862	0.9648
362	27.28	29.59	58.7	sp|O00429|DNM1L_HUMAN	Dynamin-1-like protein OS=Homo sapiens GN=DNM1L PE=1 SV=2	HUMAN	19	0.848	1.0149	0.8843	0.9651
111	53.87	57.17	59.9	sp|P25205|MCM3_HUMAN	DNA replication licensing factor MCM3 OS=Homo sapiens GN=MCM3 PE=1 SV=3	HUMAN	38	0.848	1.0311	0.8771	0.9652
1018	13.35	16.71	51.7	sp|P09525|ANXA4_HUMAN	Annexin A4 OS=Homo sapiens GN=ANXA4 PE=1 SV=4	HUMAN	9	0.848	1.1116	0.8845	0.9654
388	26.32	26.6	53.2	sp|P31040|DHSA_HUMAN	Succinate dehydrogenase [ubiquinone] flavoprotein subunit, mitochondrial OS=Homo sapiens GN=SDHA PE=1 SV=2	HUMAN	19	0.8481	0.9934	0.852	0.9657
2522	4.02	4.09	45.6	sp|Q9NP72|RAB18_HUMAN	Ras-related protein Rab-18 OS=Homo sapiens GN=RAB18 PE=1 SV=1	HUMAN	4	0.8481	1.1174	0.764	0.9658
1299	10.3	10.36	36.3	sp|P09496|CLCA_HUMAN	Clathrin light chain A OS=Homo sapiens GN=CLTA PE=1 SV=1	HUMAN	8	0.8481	1.0112	0.8855	0.9659
2354	4.41	4.48	30.7	sp|Q13057|COASY_HUMAN	Bifunctional coenzyme A synthase OS=Homo sapiens GN=COASY PE=1 SV=4	HUMAN	4	0.8482	0.8479	0.7586	0.966
3783	1.85	2.09	25.1	sp|Q8IY95|TM192_HUMAN	Transmembrane protein 192 OS=Homo sapiens GN=TMEM192 PE=1 SV=1	HUMAN	1	0.8482	0.9116	0.8299	0.966
1399	9.61	9.62	32.2	sp|O00193|SMAP_HUMAN	Small acidic protein OS=Homo sapiens GN=SMAP PE=1 SV=1	HUMAN	8	0.8482	1.0035	0.9791	0.966
2489	4.04	4.73	30.7	sp|Q13363|CTBP1_HUMAN	C-terminal-binding protein 1 OS=Homo sapiens GN=CTBP1 PE=1 SV=2	HUMAN	3	0.8484	0.9611	1.0819	0.9662
117	52.49	53.33	52.8	sp|Q8N163|K1967_HUMAN	DBIRD complex subunit KIAA1967 OS=Homo sapiens GN=KIAA1967 PE=1 SV=2	HUMAN	43	0.8485	0.953	0.9721	0.9662
2806	3.29	4.14	39.4	sp|O75223|GGCT_HUMAN	Gamma-glutamylcyclotransferase OS=Homo sapiens GN=GGCT PE=1 SV=1	HUMAN	4	0.8485	1.3456	0.8817	0.9662
56	73.66	76.56	77.2	sp|O60506|HNRPQ_HUMAN	Heterogeneous nuclear ribonucleoprotein Q OS=Homo sapiens GN=SYNCRIP PE=1 SV=2	HUMAN	80	0.8486	1.0137	0.8654	0.9663
1694	7.61	7.97	49.8	sp|Q8WXA9|SREK1_HUMAN	Splicing regulatory glutamine/lysine-rich protein 1 OS=Homo sapiens GN=SREK1 PE=1 SV=1	HUMAN	6	0.8488	0.9825	0.8347	0.9663
1183	11.45	11.5	68.2	sp|Q9BVG4|CX026_HUMAN	UPF0368 protein Cxorf26 OS=Homo sapiens GN=CXorf26 PE=1 SV=1	HUMAN	6	0.8488	0.927	0.9081	0.9664
694	18.12	20.31	65.1	sp|P08559|ODPA_HUMAN	Pyruvate dehydrogenase E1 component subunit alpha, somatic form, mitochondrial OS=Homo sapiens GN=PDHA1 PE=1 SV=3	HUMAN	15	0.8489	0.9451	0.9132	0.9664
2857	3.07	3.28	47.5	sp|Q96ER9|CCD51_HUMAN	Coiled-coil domain-containing protein 51 OS=Homo sapiens GN=CCDC51 PE=1 SV=2	HUMAN	3	0.849	0.7701	0.8411	0.9664
2708	3.73	4.57	35.6	sp|O95819|M4K4_HUMAN	Mitogen-activated protein kinase kinase kinase kinase 4 OS=Homo sapiens GN=MAP4K4 PE=1 SV=2	HUMAN	3	0.849	0.9492	0.7772	0.9665
2265	4.86	5.35	44.9	sp|Q9H2G2|SLK_HUMAN	STE20-like serine/threonine-protein kinase OS=Homo sapiens GN=SLK PE=1 SV=1	HUMAN	4	0.849	0.9616	0.7892	0.9665
644	19.03	19.89	31.7	sp|Q9UPT8|ZC3H4_HUMAN	Zinc finger CCCH domain-containing protein 4 OS=Homo sapiens GN=ZC3H4 PE=1 SV=3	HUMAN	14	0.849	1.0233	0.8459	0.9665
3497	2	2.43	30.6	sp|O14972|DSCR3_HUMAN	Down syndrome critical region protein 3 OS=Homo sapiens GN=DSCR3 PE=1 SV=1	HUMAN	2	0.8491	0.6177	1.1465	0.9666
3671	2	2.03	32.2	sp|Q8IY57|YAF2_HUMAN	YY1-associated factor 2 OS=Homo sapiens GN=YAF2 PE=1 SV=3	HUMAN	1	0.8491	0.9466	1.007	0.9667
843	15.58	16.17	51.8	sp|P17480|UBF1_HUMAN	Nucleolar transcription factor 1 OS=Homo sapiens GN=UBTF PE=1 SV=1	HUMAN	11	0.8491	1.0619	0.9079	0.9669
1194	11.34	12.36	54	sp|Q9BVK6|TMED9_HUMAN	Transmembrane emp24 domain-containing protein 9 OS=Homo sapiens GN=TMED9 PE=1 SV=2	HUMAN	12	0.8492	1.0113	0.8268	0.967
2346	4.45	4.48	32.2	sp|Q96BS2|CHP3_HUMAN	Calcineurin B homologous protein 3 OS=Homo sapiens GN=TESC PE=1 SV=3	HUMAN	3	0.8495	0.9782	0.8394	0.9677
84	62.47	63.18	77.8	sp|P29350|PTN6_HUMAN	Tyrosine-protein phosphatase non-receptor type 6 OS=Homo sapiens GN=PTPN6 PE=1 SV=1	HUMAN	57	0.8495	0.9901	0.8363	0.9677
879	15.07	15.69	75.9	sp|P46779|RL28_HUMAN	60S ribosomal protein L28 OS=Homo sapiens GN=RPL28 PE=1 SV=3	HUMAN	10	0.8495	0.9451	0.8991	0.9682
212	39.38	41.32	51.4	sp|P31146|COR1A_HUMAN	Coronin-1A OS=Homo sapiens GN=CORO1A PE=1 SV=4	HUMAN	35	0.8495	1.0096	0.903	0.9682
2651	4	4.01	27.5	sp|Q16540|RM23_HUMAN	39S ribosomal protein L23, mitochondrial OS=Homo sapiens GN=MRPL23 PE=1 SV=1	HUMAN	2	0.8495	1.0347	0.892	0.9683
3576	2	2.14	33.7	sp|Q96D96|HVCN1_HUMAN	Voltage-gated hydrogen channel 1 OS=Homo sapiens GN=HVCN1 PE=1 SV=1	HUMAN	1	0.8495	0.9451	1.1117	0.9683
3095	2.25	2.78	29.3	sp|Q9HBL7|PLRKT_HUMAN	Plasminogen receptor (KT) OS=Homo sapiens GN=PLGRKT PE=1 SV=1	HUMAN	1	0.8496	1.0233	0.8811	0.9687
1321	10.13	10.82	29.2	sp|P19838|NFKB1_HUMAN	Nuclear factor NF-kappa-B p105 subunit OS=Homo sapiens GN=NFKB1 PE=1 SV=2	HUMAN	6	0.8497	1.0165	0.7665	0.9689
66	67.64	68.64	82.1	sp|P31939|PUR9_HUMAN	Bifunctional purine biosynthesis protein PURH OS=Homo sapiens GN=ATIC PE=1 SV=3	HUMAN	56	0.8497	1.0306	0.8623	0.9692
1791	6.93	7.15	47.5	sp|Q9Y673|ALG5_HUMAN	Dolichyl-phosphate beta-glucosyltransferase OS=Homo sapiens GN=ALG5 PE=1 SV=1	HUMAN	5	0.85	0.9179	0.9433	0.9692
775	16.77	18.57	47.3	sp|Q9Y606|TRUA_HUMAN	tRNA pseudouridine synthase A, mitochondrial OS=Homo sapiens GN=PUS1 PE=1 SV=3	HUMAN	10	0.8501	1.0041	0.8787	0.9693
1275	10.51	12.05	32.5	sp|Q9Y263|PLAP_HUMAN	Phospholipase A-2-activating protein OS=Homo sapiens GN=PLAA PE=1 SV=2	HUMAN	9	0.8504	0.7427	0.976	0.9693
1230	10.89	11.14	48.7	sp|Q8TAT6|NPL4_HUMAN	Nuclear protein localization protein 4 homolog OS=Homo sapiens GN=NPLOC4 PE=1 SV=3	HUMAN	7	0.8505	0.8098	1.0988	0.9694
1317	10.16	10.28	53.4	sp|Q9GZL7|WDR12_HUMAN	Ribosome biogenesis protein WDR12 OS=Homo sapiens GN=WDR12 PE=1 SV=2	HUMAN	9	0.8505	1.0567	0.9091	0.9694
299	31.21	33.27	31.9	sp|Q8TEM1|PO210_HUMAN	Nuclear pore membrane glycoprotein 210 OS=Homo sapiens GN=NUP210 PE=1 SV=3	HUMAN	28	0.8506	1.0004	0.8846	0.9694
1373	9.85	10.73	74	sp|P61970|NTF2_HUMAN	Nuclear transport factor 2 OS=Homo sapiens GN=NUTF2 PE=1 SV=1	HUMAN	15	0.8506	1.0036	0.8987	0.9695
424	25.13	25.62	61.4	sp|Q13283|G3BP1_HUMAN	Ras GTPase-activating protein-binding protein 1 OS=Homo sapiens GN=G3BP1 PE=1 SV=1	HUMAN	22	0.8507	0.9395	0.8309	0.9696
581	20.44	20.59	70	sp|P62136|PP1A_HUMAN	Serine/threonine-protein phosphatase PP1-alpha catalytic subunit OS=Homo sapiens GN=PPP1CA PE=1 SV=1	HUMAN	12	0.8508	0.8568	0.8318	0.9697
2821	3.23	3.23	53.6	sp|P61927|RL37_HUMAN	60S ribosomal protein L37 OS=Homo sapiens GN=RPL37 PE=1 SV=2	HUMAN	3	0.8508	0.9707	0.7688	0.9697
2272	4.83	4.87	57.6	sp|Q9Y2S7|PDIP2_HUMAN	Polymerase delta-interacting protein 2 OS=Homo sapiens GN=POLDIP2 PE=1 SV=1	HUMAN	3	0.8508	0.9656	1.0554	0.9697
33	87.47	89.88	77.9	sp|P38646|GRP75_HUMAN	Stress-70 protein, mitochondrial OS=Homo sapiens GN=HSPA9 PE=1 SV=2	HUMAN	81	0.8509	0.994	0.8675	0.9698
1273	10.53	11.36	44.9	sp|Q9BXS5|AP1M1_HUMAN	AP-1 complex subunit mu-1 OS=Homo sapiens GN=AP1M1 PE=1 SV=3	HUMAN	9	0.851	0.8749	0.9878	0.97
196	40.53	41.27	72.4	sp|P17980|PRS6A_HUMAN	26S protease regulatory subunit 6A OS=Homo sapiens GN=PSMC3 PE=1 SV=3	HUMAN	37	0.8511	1.0185	0.8358	0.9703
2150	5.49	5.52	35	sp|Q9UNE7|CHIP_HUMAN	E3 ubiquitin-protein ligase CHIP OS=Homo sapiens GN=STUB1 PE=1 SV=2	HUMAN	4	0.8511	1.1168	0.8732	0.9704
2854	3.08	5.5	23.9	sp|Q15031|SYLM_HUMAN	Probable leucine--tRNA ligase, mitochondrial OS=Homo sapiens GN=LARS2 PE=1 SV=2	HUMAN	3	0.8511	1.1961	0.8848	0.9705
4973	0.05	0.12	14.8	RRRRRsp|O00341|EAA5_HUMAN	REVERSED Excitatory amino acid transporter 5 OS=Homo sapiens GN=SLC1A7 PE=2 SV=2	HUMAN	1	0.8512	0.8551	0.8641	0.9705
100	57.11	57.4	41.2	sp|P49792|RBP2_HUMAN	E3 SUMO-protein ligase RanBP2 OS=Homo sapiens GN=RANBP2 PE=1 SV=2	HUMAN	40	0.8512	0.9594	0.9099	0.9705
1877	6.4	6.93	33.8	sp|P55039|DRG2_HUMAN	Developmentally-regulated GTP-binding protein 2 OS=Homo sapiens GN=DRG2 PE=1 SV=1	HUMAN	5	0.8513	0.9335	0.9588	0.9705
1872	6.42	6.65	33	sp|P49643|PRI2_HUMAN	DNA primase large subunit OS=Homo sapiens GN=PRIM2 PE=1 SV=2	HUMAN	3	0.8515	1.0959	0.6789	0.9706
49	78.6	79.92	80.1	sp|P50990|TCPQ_HUMAN	T-complex protein 1 subunit theta OS=Homo sapiens GN=CCT8 PE=1 SV=4	HUMAN	65	0.8515	1.0023	0.8381	0.9707
606	19.91	20.72	37.2	sp|Q92973|TNPO1_HUMAN	Transportin-1 OS=Homo sapiens GN=TNPO1 PE=1 SV=2	HUMAN	10	0.8515	1.0457	0.8708	0.9707
1072	12.66	12.94	32.9	sp|Q96KR1|ZFR_HUMAN	Zinc finger RNA-binding protein OS=Homo sapiens GN=ZFR PE=1 SV=2	HUMAN	9	0.8516	0.8731	0.9735	0.9708
2980	2.55	3.76	25.6	sp|Q4KMP7|TB10B_HUMAN	TBC1 domain family member 10B OS=Homo sapiens GN=TBC1D10B PE=1 SV=3	HUMAN	3	0.8516	0.9103	0.9858	0.9709
92	59.48	59.82	84	sp|P00338|LDHA_HUMAN	L-lactate dehydrogenase A chain OS=Homo sapiens GN=LDHA PE=1 SV=2	HUMAN	48	0.8516	0.9876	0.9213	0.971
1413	9.43	9.79	23.6	sp|Q8IWZ3|ANKH1_HUMAN	Ankyrin repeat and KH domain-containing protein 1 OS=Homo sapiens GN=ANKHD1 PE=1 SV=1	HUMAN	7	0.8516	1.158	1.087	0.971
2358	4.39	4.41	48.6	sp|Q9Y3E5|PTH2_HUMAN	Peptidyl-tRNA hydrolase 2, mitochondrial OS=Homo sapiens GN=PTRH2 PE=1 SV=1	HUMAN	2	0.8519	0.981	0.908	0.9712
3570	2	2.16	21.6	sp|Q8N0U8|VKORL_HUMAN	Vitamin K epoxide reductase complex subunit 1-like protein 1 OS=Homo sapiens GN=VKORC1L1 PE=1 SV=2	HUMAN	1	0.8521	0.8392	1.5193	0.9712
2773	3.44	3.79	25.7	sp|Q14643|ITPR1_HUMAN	Inositol 1,4,5-trisphosphate receptor type 1 OS=Homo sapiens GN=ITPR1 PE=1 SV=2	HUMAN	5	0.8522	0.7485	1.0189	0.9713
2499	4.04	4.15	52.7	sp|Q00535|CDK5_HUMAN	Cyclin-dependent kinase 5 OS=Homo sapiens GN=CDK5 PE=1 SV=3	HUMAN	3	0.8523	1.028	0.7045	0.9714
2096	5.8	6.27	18.2	sp|P43307|SSRA_HUMAN	Translocon-associated protein subunit alpha OS=Homo sapiens GN=SSR1 PE=1 SV=3	HUMAN	3	0.8523	0.9288	0.792	0.9715
551	21.07	21.33	57.5	sp|P10515|ODP2_HUMAN	Dihydrolipoyllysine-residue acetyltransferase component of pyruvate dehydrogenase complex, mitochondrial OS=Homo sapiens GN=DLAT PE=1 SV=3	HUMAN	14	0.8524	0.9419	0.8538	0.9717
3561	2	2.18	36.1	sp|Q9NWZ5|UCKL1_HUMAN	Uridine-cytidine kinase-like 1 OS=Homo sapiens GN=UCKL1 PE=1 SV=2	HUMAN	1	0.8524	0.9183	0.9266	0.972
1574	8.2	8.6	43.7	sp|O60826|CCD22_HUMAN	Coiled-coil domain-containing protein 22 OS=Homo sapiens GN=CCDC22 PE=1 SV=1	HUMAN	5	0.8524	0.923	0.9268	0.9722
613	19.78	20.24	52	sp|P38606|VATA_HUMAN	V-type proton ATPase catalytic subunit A OS=Homo sapiens GN=ATP6V1A PE=1 SV=2	HUMAN	19	0.8524	1.0099	0.9012	0.9723
4772	0.07	0.2	26	sp|Q96Q15|SMG1_HUMAN	Serine/threonine-protein kinase SMG1 OS=Homo sapiens GN=SMG1 PE=1 SV=3	HUMAN	4	0.8525	1.4667	0.4696	0.9725
64	68.54	69.43	66.9	sp|P49736|MCM2_HUMAN	DNA replication licensing factor MCM2 OS=Homo sapiens GN=MCM2 PE=1 SV=4	HUMAN	57	0.8525	1.006	0.8651	0.9726
1976	6.06	6.15	32.2	sp|Q96CN7|ISOC1_HUMAN	Isochorismatase domain-containing protein 1 OS=Homo sapiens GN=ISOC1 PE=1 SV=3	HUMAN	4	0.8525	0.9586	0.9705	0.9728
2665	3.94	3.95	29.7	sp|O75695|XRP2_HUMAN	Protein XRP2 OS=Homo sapiens GN=RP2 PE=1 SV=4	HUMAN	2	0.8526	1.0034	0.8158	0.9728
4947	0.05	0.22	22.2	sp|Q8TE73|DYH5_HUMAN	Dynein heavy chain 5, axonemal OS=Homo sapiens GN=DNAH5 PE=1 SV=3	HUMAN	3	0.8526	1.7439	0.517	0.9729
1499	8.73	31.56	74	sp|P42167|LAP2B_HUMAN	Lamina-associated polypeptide 2, isoforms beta/gamma OS=Homo sapiens GN=TMPO PE=1 SV=2	HUMAN	36	0.8527	0.8582	0.9796	0.9729
3454	2.01	2.02	23.9	sp|P20138|CD33_HUMAN	Myeloid cell surface antigen CD33 OS=Homo sapiens GN=CD33 PE=1 SV=2	HUMAN	1	0.853	0.8634	0.9704	0.9729
2338	4.47	5.67	40.6	sp|Q9BUI4|RPC3_HUMAN	DNA-directed RNA polymerase III subunit RPC3 OS=Homo sapiens GN=POLR3C PE=1 SV=1	HUMAN	4	0.8531	0.7514	0.6655	0.9729
1961	6.09	6.11	44	sp|O95983|MBD3_HUMAN	Methyl-CpG-binding domain protein 3 OS=Homo sapiens GN=MBD3 PE=1 SV=1	HUMAN	4	0.8532	1.0047	0.9267	0.9729
3856	1.55	1.58	23.6	sp|Q9BSE5|SPEB_HUMAN	Agmatinase, mitochondrial OS=Homo sapiens GN=AGMAT PE=1 SV=2	HUMAN	1	0.8532	0.9342	1.1062	0.9729
3990	1.02	1.19	31.9	sp|O43427|FIBP_HUMAN	Acidic fibroblast growth factor intracellular-binding protein OS=Homo sapiens GN=FIBP PE=1 SV=3	HUMAN	2	0.8532	1.39	0.7813	0.973
1673	7.76	7.92	65	sp|P61081|UBC12_HUMAN	NEDD8-conjugating enzyme Ubc12 OS=Homo sapiens GN=UBE2M PE=1 SV=1	HUMAN	6	0.8533	0.9652	0.9317	0.973
573	20.48	20.59	68.3	sp|Q9NX63|CHCH3_HUMAN	Coiled-coil-helix-coiled-coil-helix domain-containing protein 3, mitochondrial OS=Homo sapiens GN=CHCHD3 PE=1 SV=1	HUMAN	11	0.8533	0.9964	0.9367	0.9732
1207	11.22	11.69	48.4	sp|P30566|PUR8_HUMAN	Adenylosuccinate lyase OS=Homo sapiens GN=ADSL PE=1 SV=2	HUMAN	8	0.8535	0.8929	0.8923	0.9732
760	17.13	17.29	70.9	sp|O00170|AIP_HUMAN	AH receptor-interacting protein OS=Homo sapiens GN=AIP PE=1 SV=2	HUMAN	13	0.8535	0.9798	0.9408	0.9732
726	17.57	20.24	79.5	sp|Q12904|AIMP1_HUMAN	Aminoacyl tRNA synthase complex-interacting multifunctional protein 1 OS=Homo sapiens GN=AIMP1 PE=1 SV=2	HUMAN	18	0.8536	0.9884	0.9061	0.9732
1400	9.6	9.7	26.9	sp|Q12800|TFCP2_HUMAN	Alpha-globin transcription factor CP2 OS=Homo sapiens GN=TFCP2 PE=1 SV=2	HUMAN	7	0.8537	0.9634	0.8692	0.9733
416	25.39	31.39	71.7	sp|Q9Y277|VDAC3_HUMAN	Voltage-dependent anion-selective channel protein 3 OS=Homo sapiens GN=VDAC3 PE=1 SV=1	HUMAN	33	0.8537	1.0264	0.9344	0.9734
1638	8	8	43.4	sp|Q5RKV6|EXOS6_HUMAN	Exosome complex component MTR3 OS=Homo sapiens GN=EXOSC6 PE=1 SV=1	HUMAN	4	0.8537	0.988	1.0252	0.9734
3115	2.2	2.23	13.3	sp|P35475|IDUA_HUMAN	Alpha-L-iduronidase OS=Homo sapiens GN=IDUA PE=1 SV=2	HUMAN	1	0.8538	1.1795	0.7501	0.9734
2638	4	4.03	35.1	sp|A6NIH7|U119B_HUMAN	Protein unc-119 homolog B OS=Homo sapiens GN=UNC119B PE=1 SV=1	HUMAN	2	0.8539	0.6921	1.1069	0.9735
1526	8.49	9.06	36.3	sp|P30419|NMT1_HUMAN	Glycylpeptide N-tetradecanoyltransferase 1 OS=Homo sapiens GN=NMT1 PE=1 SV=2	HUMAN	4	0.8539	1.0936	0.881	0.9735
216	39.17	41.24	54.3	sp|P33176|KINH_HUMAN	Kinesin-1 heavy chain OS=Homo sapiens GN=KIF5B PE=1 SV=1	HUMAN	23	0.854	0.9229	0.9149	0.9737
68	67.4	71.95	72.2	sp|Q99832|TCPH_HUMAN	T-complex protein 1 subunit eta OS=Homo sapiens GN=CCT7 PE=1 SV=2	HUMAN	55	0.854	0.9775	0.8813	0.9738
90	60.11	60.7	54.6	sp|P23246|SFPQ_HUMAN	Splicing factor, proline- and glutamine-rich OS=Homo sapiens GN=SFPQ PE=1 SV=2	HUMAN	51	0.8541	0.9911	0.872	0.9738
533	21.4	21.77	50.8	sp|Q9UQ35|SRRM2_HUMAN	Serine/arginine repetitive matrix protein 2 OS=Homo sapiens GN=SRRM2 PE=1 SV=2	HUMAN	17	0.8542	0.9764	0.8009	0.9738
1672	7.77	8.03	36.7	sp|Q96BY6|DOC10_HUMAN	Dedicator of cytokinesis protein 10 OS=Homo sapiens GN=DOCK10 PE=1 SV=3	HUMAN	4	0.8542	1.0417	0.7907	0.9738
1064	12.76	12.88	25.8	sp|Q8IZ83|A16A1_HUMAN	Aldehyde dehydrogenase family 16 member A1 OS=Homo sapiens GN=ALDH16A1 PE=1 SV=2	HUMAN	7	0.8542	1.0474	0.8681	0.9739
4844	0.06	0.25	19.9	sp|P49427|UB2R1_HUMAN	Ubiquitin-conjugating enzyme E2 R1 OS=Homo sapiens GN=CDC34 PE=1 SV=2	HUMAN	0	0.8543	0.8667	0.8967	0.974
3915	1.33	1.33	39.3	sp|Q9NQX7|ITM2C_HUMAN	Integral membrane protein 2C OS=Homo sapiens GN=ITM2C PE=1 SV=1	HUMAN	2	0.8543	0.9436	0.8821	0.974
788	16.57	17.3	82	sp|Q9HAV7|GRPE1_HUMAN	GrpE protein homolog 1, mitochondrial OS=Homo sapiens GN=GRPEL1 PE=1 SV=2	HUMAN	13	0.8544	1.061	0.8545	0.9741
2626	4	4.04	39.2	sp|P17275|JUNB_HUMAN	Transcription factor jun-B OS=Homo sapiens GN=JUNB PE=1 SV=1	HUMAN	2	0.8545	0.7296	0.7962	0.9741
4012	0.94	22.63	85.2	sp|P62987|RL40_HUMAN	Ubiquitin-60S ribosomal protein L40 OS=Homo sapiens GN=UBA52 PE=1 SV=2	HUMAN	18	0.8545	0.9924	1.026	0.9741
186	42.23	43.51	53.2	sp|P19367|HXK1_HUMAN	Hexokinase-1 OS=Homo sapiens GN=HK1 PE=1 SV=3	HUMAN	24	0.8546	1.0483	0.8072	0.9741
599	20.02	20.31	54.8	sp|Q01105|SET_HUMAN	Protein SET OS=Homo sapiens GN=SET PE=1 SV=3	HUMAN	16	0.8548	0.9792	0.864	0.9743
4060	0.81	0.85	30.2	sp|P83111|LACTB_HUMAN	Serine beta-lactamase-like protein LACTB, mitochondrial OS=Homo sapiens GN=LACTB PE=1 SV=2	HUMAN	1	0.8549	1.1631	0.4395	0.9743
259	35.17	35.45	73	sp|Q15084|PDIA6_HUMAN	Protein disulfide-isomerase A6 OS=Homo sapiens GN=PDIA6 PE=1 SV=1	HUMAN	34	0.855	1.0157	0.8471	0.9743
227	37.9	38.61	49.4	sp|P06396|GELS_HUMAN	Gelsolin OS=Homo sapiens GN=GSN PE=1 SV=1	HUMAN	30	0.8552	1.0202	0.934	0.9744
152	46.19	47.73	46.6	sp|O75533|SF3B1_HUMAN	Splicing factor 3B subunit 1 OS=Homo sapiens GN=SF3B1 PE=1 SV=3	HUMAN	40	0.8554	0.9381	0.8841	0.9744
861	15.34	18.54	55.8	sp|Q13217|DNJC3_HUMAN	DnaJ homolog subfamily C member 3 OS=Homo sapiens GN=DNAJC3 PE=1 SV=1	HUMAN	10	0.8554	0.9662	0.8869	0.9745
2382	4.29	4.29	45.4	sp|P14854|CX6B1_HUMAN	Cytochrome c oxidase subunit 6B1 OS=Homo sapiens GN=COX6B1 PE=1 SV=2	HUMAN	9	0.8555	0.8779	0.8111	0.9745
681	18.32	19.07	65	sp|P83731|RL24_HUMAN	60S ribosomal protein L24 OS=Homo sapiens GN=RPL24 PE=1 SV=1	HUMAN	19	0.8556	0.9597	0.897	0.9747
632	19.32	19.52	37.1	sp|Q14677|EPN4_HUMAN	Clathrin interactor 1 OS=Homo sapiens GN=CLINT1 PE=1 SV=1	HUMAN	11	0.8556	1.0492	0.8309	0.9749
3125	2.19	2.28	30.9	sp|Q92575|UBXN4_HUMAN	UBX domain-containing protein 4 OS=Homo sapiens GN=UBXN4 PE=1 SV=2	HUMAN	3	0.8556	1.1121	0.8734	0.9749
4092	0.72	0.77	14	sp|Q13485|SMAD4_HUMAN	Mothers against decapentaplegic homolog 4 OS=Homo sapiens GN=SMAD4 PE=1 SV=1	HUMAN	1	0.8557	1.2302	0.6471	0.9751
3272	2.03	2.41	34.9	sp|Q3MHD2|LSM12_HUMAN	Protein LSM12 homolog OS=Homo sapiens GN=LSM12 PE=1 SV=2	HUMAN	3	0.8558	0.8684	0.9595	0.9751
105	55.27	72.71	73.5	sp|Q03252|LMNB2_HUMAN	Lamin-B2 OS=Homo sapiens GN=LMNB2 PE=1 SV=3	HUMAN	48	0.8558	1.029	0.8862	0.9752
1649	7.96	8.88	39.6	sp|Q86TB9|PATL1_HUMAN	Protein PAT1 homolog 1 OS=Homo sapiens GN=PATL1 PE=1 SV=2	HUMAN	5	0.8559	1.0114	0.7846	0.9753
1586	8.13	16.15	60.2	sp|Q13162|PRDX4_HUMAN	Peroxiredoxin-4 OS=Homo sapiens GN=PRDX4 PE=1 SV=1	HUMAN	13	0.8559	0.9902	0.8271	0.9754
118	52.16	52.52	82.7	sp|P24752|THIL_HUMAN	Acetyl-CoA acetyltransferase, mitochondrial OS=Homo sapiens GN=ACAT1 PE=1 SV=1	HUMAN	45	0.856	0.9934	0.9108	0.9755
2563	4.01	4.06	35.6	sp|Q9NZZ3|CHMP5_HUMAN	Charged multivesicular body protein 5 OS=Homo sapiens GN=CHMP5 PE=1 SV=1	HUMAN	2	0.8561	0.8675	0.9257	0.9755
187	42.22	43.85	55.1	sp|P26639|SYTC_HUMAN	Threonine--tRNA ligase, cytoplasmic OS=Homo sapiens GN=TARS PE=1 SV=3	HUMAN	31	0.8561	0.9501	0.9336	0.9756
2050	6	6.07	33.3	sp|O60613|SEP15_HUMAN	15 kDa selenoprotein OS=Homo sapiens GN=SEP15 PE=1 SV=3	HUMAN	3	0.8561	1.1211	1.0187	0.9756
367	27.19	27.28	96.9	sp|O95336|6PGL_HUMAN	6-phosphogluconolactonase OS=Homo sapiens GN=PGLS PE=1 SV=2	HUMAN	25	0.8562	1.0001	0.8878	0.9757
1452	9.09	10.83	32.8	sp|Q13617|CUL2_HUMAN	Cullin-2 OS=Homo sapiens GN=CUL2 PE=1 SV=2	HUMAN	7	0.8564	0.8986	1.0375	0.9757
2685	3.85	3.94	52.9	sp|Q16595|FRDA_HUMAN	Frataxin, mitochondrial OS=Homo sapiens GN=FXN PE=1 SV=2	HUMAN	2	0.8565	1.0245	0.8577	0.9759
2901	2.87	3.08	31	sp|Q8IWS0|PHF6_HUMAN	PHD finger protein 6 OS=Homo sapiens GN=PHF6 PE=1 SV=1	HUMAN	3	0.8566	1.1181	0.7023	0.976
2076	5.93	6.55	52.5	sp|Q9NQ48|LZTL1_HUMAN	Leucine zipper transcription factor-like protein 1 OS=Homo sapiens GN=LZTFL1 PE=1 SV=1	HUMAN	4	0.8566	1.0692	0.8943	0.976
192	41.54	42.86	55	sp|P43243|MATR3_HUMAN	Matrin-3 OS=Homo sapiens GN=MATR3 PE=1 SV=2	HUMAN	34	0.8567	0.9821	0.8776	0.9761
1209	11.14	11.52	48.5	sp|O43809|CPSF5_HUMAN	Cleavage and polyadenylation specificity factor subunit 5 OS=Homo sapiens GN=NUDT21 PE=1 SV=1	HUMAN	12	0.8567	0.9965	0.8808	0.9761
840	15.6	19.51	52.5	sp|Q9H2K8|TAOK3_HUMAN	Serine/threonine-protein kinase TAO3 OS=Homo sapiens GN=TAOK3 PE=1 SV=2	HUMAN	10	0.8567	0.9761	0.9181	0.9761
690	18.17	18.25	36.6	sp|Q15637|SF01_HUMAN	Splicing factor 1 OS=Homo sapiens GN=SF1 PE=1 SV=4	HUMAN	21	0.8568	0.9722	0.9145	0.9763
1844	6.61	6.8	22.3	sp|P28799|GRN_HUMAN	Granulins OS=Homo sapiens GN=GRN PE=1 SV=2	HUMAN	4	0.8569	1.1211	0.8291	0.9763
183	42.3	56.5	54.8	sp|P51991|ROA3_HUMAN	Heterogeneous nuclear ribonucleoprotein A3 OS=Homo sapiens GN=HNRNPA3 PE=1 SV=2	HUMAN	64	0.857	0.9885	0.8644	0.9764
3527	2	2.27	16.2	sp|Q15904|VAS1_HUMAN	V-type proton ATPase subunit S1 OS=Homo sapiens GN=ATP6AP1 PE=1 SV=2	HUMAN	1	0.857	0.4532	1.901	0.9765
1236	10.83	10.98	58.6	sp|Q7L0Y3|MRRP1_HUMAN	Mitochondrial ribonuclease P protein 1 OS=Homo sapiens GN=TRMT10C PE=1 SV=2	HUMAN	7	0.857	0.9675	0.9168	0.9766
564	20.81	22.91	54	sp|P08567|PLEK_HUMAN	Pleckstrin OS=Homo sapiens GN=PLEK PE=1 SV=3	HUMAN	26	0.857	0.9807	0.9082	0.9766
2227	5.06	5.17	26	sp|Q13610|PWP1_HUMAN	Periodic tryptophan protein 1 homolog OS=Homo sapiens GN=PWP1 PE=1 SV=1	HUMAN	3	0.8573	0.9264	0.8249	0.9766
1025	13.27	13.36	54.4	sp|P55145|MANF_HUMAN	Mesencephalic astrocyte-derived neurotrophic factor OS=Homo sapiens GN=MANF PE=1 SV=3	HUMAN	8	0.8573	0.953	0.8931	0.9766
347	27.97	28.29	56.1	sp|P52209|6PGD_HUMAN	6-phosphogluconate dehydrogenase, decarboxylating OS=Homo sapiens GN=PGD PE=1 SV=3	HUMAN	28	0.8573	0.9468	0.9151	0.9767
2556	4.01	4.14	21.5	sp|Q8WXG6|MADD_HUMAN	MAP kinase-activating death domain protein OS=Homo sapiens GN=MADD PE=1 SV=2	HUMAN	3	0.8575	1.0481	0.7818	0.9769
1572	8.23	8.25	14.4	sp|P16070|CD44_HUMAN	CD44 antigen OS=Homo sapiens GN=CD44 PE=1 SV=3	HUMAN	8	0.8578	0.9758	0.821	0.9771
1760	7.16	22.73	58.6	sp|Q5T9A4|ATD3B_HUMAN	ATPase family AAA domain-containing protein 3B OS=Homo sapiens GN=ATAD3B PE=1 SV=1	HUMAN	13	0.8578	0.9331	0.9625	0.9771
4890	0.06	0.07	10.9	sp|Q9UHJ6|SHPK_HUMAN	Sedoheptulokinase OS=Homo sapiens GN=SHPK PE=1 SV=3	HUMAN	0	0.8579	0.8447	1.0946	0.9773
515	21.92	22.65	45.3	sp|Q641Q2|FA21A_HUMAN	WASH complex subunit FAM21A OS=Homo sapiens GN=FAM21A PE=1 SV=3	HUMAN	11	0.8581	0.9566	0.9046	0.9773
207	39.77	41.44	66	sp|P30153|2AAA_HUMAN	Serine/threonine-protein phosphatase 2A 65 kDa regulatory subunit A alpha isoform OS=Homo sapiens GN=PPP2R1A PE=1 SV=4	HUMAN	33	0.8582	0.9441	0.8773	0.9774
469	23.3	23.44	77.3	sp|P16152|CBR1_HUMAN	Carbonyl reductase [NADPH] 1 OS=Homo sapiens GN=CBR1 PE=1 SV=3	HUMAN	15	0.8585	0.9905	0.885	0.9776
2614	4	4.08	43.4	sp|P53384|NUBP1_HUMAN	Cytosolic Fe-S cluster assembly factor NUBP1 OS=Homo sapiens GN=NUBP1 PE=1 SV=2	HUMAN	2	0.8586	0.9879	0.8503	0.9777
324	29.2	30.31	49.5	sp|P23526|SAHH_HUMAN	Adenosylhomocysteinase OS=Homo sapiens GN=AHCY PE=1 SV=4	HUMAN	30	0.8587	1.0249	0.8571	0.9777
127	50.42	51.44	56	sp|Q8WUM4|PDC6I_HUMAN	Programmed cell death 6-interacting protein OS=Homo sapiens GN=PDCD6IP PE=1 SV=1	HUMAN	29	0.8587	0.9768	0.9112	0.9778
1067	12.74	15.81	53.4	sp|P60953|CDC42_HUMAN	Cell division control protein 42 homolog OS=Homo sapiens GN=CDC42 PE=1 SV=2	HUMAN	16	0.8588	1.0298	0.8727	0.9779
2054	6	6.03	39.3	sp|Q9NPJ3|ACO13_HUMAN	Acyl-coenzyme A thioesterase 13 OS=Homo sapiens GN=ACOT13 PE=1 SV=1	HUMAN	6	0.8588	1.1105	0.9681	0.9779
3074	2.3	2.36	23	sp|Q9H3M7|TXNIP_HUMAN	Thioredoxin-interacting protein OS=Homo sapiens GN=TXNIP PE=1 SV=1	HUMAN	1	0.8588	1.096	1.026	0.978
81	63.57	64	67	sp|P33993|MCM7_HUMAN	DNA replication licensing factor MCM7 OS=Homo sapiens GN=MCM7 PE=1 SV=4	HUMAN	54	0.8589	0.9885	0.9009	0.978
4018	0.93	1.37	36.3	sp|Q0VDG4|SCRN3_HUMAN	Secernin-3 OS=Homo sapiens GN=SCRN3 PE=1 SV=1	HUMAN	1	0.8589	1.5648	0.7849	0.9781
1039	13.08	13.46	49.4	sp|P55809|SCOT1_HUMAN	Succinyl-CoA:3-ketoacid coenzyme A transferase 1, mitochondrial OS=Homo sapiens GN=OXCT1 PE=1 SV=1	HUMAN	13	0.859	1.105	0.9759	0.9782
2166	5.4	5.4	61.2	sp|P82909|RT36_HUMAN	28S ribosomal protein S36, mitochondrial OS=Homo sapiens GN=MRPS36 PE=1 SV=2	HUMAN	4	0.8591	0.9477	0.8046	0.9783
1233	10.87	10.99	31	sp|Q14137|BOP1_HUMAN	Ribosome biogenesis protein BOP1 OS=Homo sapiens GN=BOP1 PE=1 SV=2	HUMAN	6	0.8591	0.931	0.7939	0.9783
2558	4.01	4.13	32.4	sp|Q99496|RING2_HUMAN	E3 ubiquitin-protein ligase RING2 OS=Homo sapiens GN=RNF2 PE=1 SV=1	HUMAN	2	0.8591	0.9611	0.8599	0.9784
2762	3.5	3.55	26.9	sp|Q9NPF4|OSGEP_HUMAN	Probable tRNA threonylcarbamoyladenosine biosynthesis protein OSGEP OS=Homo sapiens GN=OSGEP PE=1 SV=1	HUMAN	3	0.8591	0.863	0.9687	0.9784
1908	6.25	6.92	47.9	sp|Q6YN16|HSDL2_HUMAN	Hydroxysteroid dehydrogenase-like protein 2 OS=Homo sapiens GN=HSDL2 PE=1 SV=1	HUMAN	3	0.8591	1.0316	0.8756	0.9785
330	28.94	38.74	57.8	sp|Q96AE4|FUBP1_HUMAN	Far upstream element-binding protein 1 OS=Homo sapiens GN=FUBP1 PE=1 SV=3	HUMAN	33	0.8592	1.0028	0.8575	0.9786
575	20.46	24.49	67.1	sp|P36542|ATPG_HUMAN	ATP synthase subunit gamma, mitochondrial OS=Homo sapiens GN=ATP5C1 PE=1 SV=1	HUMAN	18	0.8592	0.9888	0.9008	0.9788
221	38.56	40.57	82.3	sp|P06748|NPM_HUMAN	Nucleophosmin OS=Homo sapiens GN=NPM1 PE=1 SV=2	HUMAN	76	0.8593	1.0112	0.8845	0.9788
3076	2.29	2.79	43.3	sp|O95372|LYPA2_HUMAN	Acyl-protein thioesterase 2 OS=Homo sapiens GN=LYPLA2 PE=1 SV=1	HUMAN	2	0.8595	0.9756	0.7263	0.9789
1224	10.95	11.68	54.9	sp|O95299|NDUAA_HUMAN	NADH dehydrogenase [ubiquinone] 1 alpha subcomplex subunit 10, mitochondrial OS=Homo sapiens GN=NDUFA10 PE=1 SV=1	HUMAN	5	0.8596	0.9052	1.065	0.9791
98	57.35	61.45	77.9	sp|P17987|TCPA_HUMAN	T-complex protein 1 subunit alpha OS=Homo sapiens GN=TCP1 PE=1 SV=1	HUMAN	59	0.8599	0.9681	0.9656	0.9791
873	15.17	15.2	54.8	sp|Q13347|EIF3I_HUMAN	Eukaryotic translation initiation factor 3 subunit I OS=Homo sapiens GN=EIF3I PE=1 SV=1	HUMAN	12	0.86	1.0677	0.8962	0.9794
323	29.29	29.99	54.2	sp|O15371|EIF3D_HUMAN	Eukaryotic translation initiation factor 3 subunit D OS=Homo sapiens GN=EIF3D PE=1 SV=1	HUMAN	26	0.8601	0.9833	0.8486	0.9794
4507	0.14	0.21	11.5	RRRRRsp|Q9HB14|KCNKD_HUMAN	REVERSED Potassium channel subfamily K member 13 OS=Homo sapiens GN=KCNK13 PE=2 SV=2	HUMAN	0	0.8601	1.34	1.1019	0.9795
3795	1.82	1.84	29.5	sp|Q9NXK8|FXL12_HUMAN	F-box/LRR-repeat protein 12 OS=Homo sapiens GN=FBXL12 PE=1 SV=1	HUMAN	1	0.8605	0.7714	0.7986	0.9795
3560	2	2.18	24.9	sp|O95373|IPO7_HUMAN	Importin-7 OS=Homo sapiens GN=IPO7 PE=1 SV=1	HUMAN	2	0.8605	0.9509	0.8708	0.9796
1036	13.14	14.7	39.9	sp|Q6P996|PDXD1_HUMAN	Pyridoxal-dependent decarboxylase domain-containing protein 1 OS=Homo sapiens GN=PDXDC1 PE=1 SV=2	HUMAN	7	0.8606	0.7939	0.8648	0.9797
2985	2.54	2.82	51.5	sp|P22830|HEMH_HUMAN	Ferrochelatase, mitochondrial OS=Homo sapiens GN=FECH PE=1 SV=2	HUMAN	2	0.8608	1.1226	0.9892	0.9798
1095	12.39	12.6	56	sp|P29218|IMPA1_HUMAN	Inositol monophosphatase 1 OS=Homo sapiens GN=IMPA1 PE=1 SV=1	HUMAN	6	0.8609	0.9723	0.866	0.9799
1988	6.04	7.05	38.3	sp|Q9NZ09|UBAP1_HUMAN	Ubiquitin-associated protein 1 OS=Homo sapiens GN=UBAP1 PE=1 SV=1	HUMAN	4	0.8609	0.9168	0.9304	0.98
1308	10.23	10.37	85.8	sp|Q01081|U2AF1_HUMAN	Splicing factor U2AF 35 kDa subunit OS=Homo sapiens GN=U2AF1 PE=1 SV=3	HUMAN	18	0.8609	0.9179	0.933	0.9802
967	14	14.05	55	sp|Q8TAE8|G45IP_HUMAN	Growth arrest and DNA damage-inducible proteins-interacting protein 1 OS=Homo sapiens GN=GADD45GIP1 PE=1 SV=1	HUMAN	8	0.861	0.9532	0.9009	0.9802
4294	0.31	0.42	31.6	sp|Q15051|IQCB1_HUMAN	IQ calmodulin-binding motif-containing protein 1 OS=Homo sapiens GN=IQCB1 PE=1 SV=1	HUMAN	1	0.861	0.9324	0.9982	0.9805
1523	8.52	8.6	64.3	sp|P63173|RL38_HUMAN	60S ribosomal protein L38 OS=Homo sapiens GN=RPL38 PE=1 SV=2	HUMAN	6	0.8611	1.0135	1.0605	0.9805
2942	2.71	2.98	29.1	sp|Q86Y07|VRK2_HUMAN	Serine/threonine-protein kinase VRK2 OS=Homo sapiens GN=VRK2 PE=1 SV=3	HUMAN	2	0.8612	0.904	0.823	0.9806
3000	2.49	2.5	51.6	sp|Q9H2H8|PPIL3_HUMAN	Peptidyl-prolyl cis-trans isomerase-like 3 OS=Homo sapiens GN=PPIL3 PE=1 SV=1	HUMAN	3	0.8612	0.9534	0.883	0.9806
621	19.67	19.9	57.1	sp|Q9NR45|SIAS_HUMAN	Sialic acid synthase OS=Homo sapiens GN=NANS PE=1 SV=2	HUMAN	12	0.8612	0.9868	0.8743	0.9807
924	14.47	15.43	45.3	sp|Q9UGP8|SEC63_HUMAN	Translocation protein SEC63 homolog OS=Homo sapiens GN=SEC63 PE=1 SV=2	HUMAN	11	0.8613	0.9292	0.7974	0.9808
907	14.7	16.6	39.9	sp|O43765|SGTA_HUMAN	Small glutamine-rich tetratricopeptide repeat-containing protein alpha OS=Homo sapiens GN=SGTA PE=1 SV=1	HUMAN	13	0.8613	0.9507	0.8809	0.9809
3104	2.21	4.55	42.4	sp|Q9H9S4|CB39L_HUMAN	Calcium-binding protein 39-like OS=Homo sapiens GN=CAB39L PE=1 SV=3	HUMAN	2	0.8614	0.8501	0.6706	0.9809
101	56.7	58.11	61.6	sp|Q13435|SF3B2_HUMAN	Splicing factor 3B subunit 2 OS=Homo sapiens GN=SF3B2 PE=1 SV=2	HUMAN	42	0.8614	1.0219	0.8554	0.981
1917	6.22	6.51	28.2	sp|O75915|PRAF3_HUMAN	PRA1 family protein 3 OS=Homo sapiens GN=ARL6IP5 PE=1 SV=1	HUMAN	7	0.8615	0.98	0.9429	0.981
4227	0.41	0.47	17.6	sp|Q14667|K0100_HUMAN	UPF0378 protein KIAA0100 OS=Homo sapiens GN=KIAA0100 PE=1 SV=3	HUMAN	1	0.8615	0.9328	0.9943	0.981
2894	2.91	2.96	18.2	sp|P49711|CTCF_HUMAN	Transcriptional repressor CTCF OS=Homo sapiens GN=CTCF PE=1 SV=1	HUMAN	4	0.8618	0.816	0.8568	0.9812
705	18	18.44	41.3	sp|Q9H307|PININ_HUMAN	Pinin OS=Homo sapiens GN=PNN PE=1 SV=4	HUMAN	14	0.8618	1.0033	0.9358	0.9813
577	20.45	20.93	60.7	sp|Q9BXJ9|NAA15_HUMAN	N-alpha-acetyltransferase 15, NatA auxiliary subunit OS=Homo sapiens GN=NAA15 PE=1 SV=1	HUMAN	12	0.8619	0.9302	0.8892	0.9814
1289	10.39	10.86	35.2	sp|Q96JM3|CHAP1_HUMAN	Chromosome alignment-maintaining phosphoprotein 1 OS=Homo sapiens GN=CHAMP1 PE=1 SV=2	HUMAN	6	0.8621	1.0414	0.8331	0.9814
794	16.52	19.05	38.8	sp|Q14789|GOGB1_HUMAN	Golgin subfamily B member 1 OS=Homo sapiens GN=GOLGB1 PE=1 SV=2	HUMAN	15	0.8622	0.9057	0.805	0.9815
2525	4.02	4.02	64.8	sp|O43504|LTOR5_HUMAN	Ragulator complex protein LAMTOR5 OS=Homo sapiens GN=LAMTOR5 PE=1 SV=1	HUMAN	2	0.8622	0.9588	0.7946	0.9818
793	16.54	17.13	48.9	sp|Q9BWM7|SFXN3_HUMAN	Sideroflexin-3 OS=Homo sapiens GN=SFXN3 PE=2 SV=2	HUMAN	15	0.8622	0.8152	1.0102	0.9818
1903	6.27	6.57	37.4	sp|O43660|PLRG1_HUMAN	Pleiotropic regulator 1 OS=Homo sapiens GN=PLRG1 PE=1 SV=1	HUMAN	4	0.8623	0.8504	0.8337	0.9819
2527	4.01	7.85	26.3	sp|Q86XI2|CNDG2_HUMAN	Condensin-2 complex subunit G2 OS=Homo sapiens GN=NCAPG2 PE=1 SV=1	HUMAN	5	0.8623	1.1671	0.9503	0.9819
1269	10.55	11.86	40.1	sp|O75153|CLU_HUMAN	Clustered mitochondria protein homolog OS=Homo sapiens GN=KIAA0664 PE=1 SV=2	HUMAN	9	0.8624	1.0058	0.6651	0.9819
4648	0.09	7.04	46	sp|P01116|RASK_HUMAN	GTPase KRas OS=Homo sapiens GN=KRAS PE=1 SV=1	HUMAN	4	0.8624	1.1909	0.8238	0.9821
251	36	36.96	50.1	sp|Q9UKV3|ACINU_HUMAN	Apoptotic chromatin condensation inducer in the nucleus OS=Homo sapiens GN=ACIN1 PE=1 SV=2	HUMAN	27	0.8626	0.9278	0.9517	0.9821
94	58.5	60.07	55.6	sp|Q14152|EIF3A_HUMAN	Eukaryotic translation initiation factor 3 subunit A OS=Homo sapiens GN=EIF3A PE=1 SV=1	HUMAN	40	0.8627	0.9217	0.8442	0.9822
339	28.32	30.26	73.3	sp|P62333|PRS10_HUMAN	26S protease regulatory subunit 10B OS=Homo sapiens GN=PSMC6 PE=1 SV=1	HUMAN	25	0.8627	0.9822	0.8843	0.9823
1940	6.13	7.41	34.6	sp|Q13330|MTA1_HUMAN	Metastasis-associated protein MTA1 OS=Homo sapiens GN=MTA1 PE=1 SV=2	HUMAN	4	0.8627	1.0759	0.8522	0.9824
925	14.46	15.59	43.3	sp|O95466|FMNL_HUMAN	Formin-like protein 1 OS=Homo sapiens GN=FMNL1 PE=1 SV=3	HUMAN	8	0.8627	1.0487	0.9928	0.9824
3850	1.59	1.72	13.6	sp|Q7Z3K3|POGZ_HUMAN	Pogo transposable element with ZNF domain OS=Homo sapiens GN=POGZ PE=1 SV=2	HUMAN	2	0.8628	0.9013	0.7994	0.9825
4313	0.29	0.35	21.2	sp|O00462|MANBA_HUMAN	Beta-mannosidase OS=Homo sapiens GN=MANBA PE=1 SV=3	HUMAN	1	0.8628	0.2393	3.563	0.9825
831	15.79	18.58	31.6	sp|P05556|ITB1_HUMAN	Integrin beta-1 OS=Homo sapiens GN=ITGB1 PE=1 SV=2	HUMAN	9	0.8629	0.8977	0.8809	0.9828
496	22.5	23.05	43.4	sp|Q9UNM6|PSD13_HUMAN	26S proteasome non-ATPase regulatory subunit 13 OS=Homo sapiens GN=PSMD13 PE=1 SV=2	HUMAN	15	0.863	0.9986	0.883	0.9828
1065	12.76	12.84	80.2	sp|P49458|SRP09_HUMAN	Signal recognition particle 9 kDa protein OS=Homo sapiens GN=SRP9 PE=1 SV=2	HUMAN	7	0.863	1.0447	0.9215	0.9828
708	17.93	19.32	34.8	sp|Q9Y6Y8|S23IP_HUMAN	SEC23-interacting protein OS=Homo sapiens GN=SEC23IP PE=1 SV=1	HUMAN	10	0.8634	0.9689	0.8117	0.9829
189	42.12	45.18	48.7	sp|O14980|XPO1_HUMAN	Exportin-1 OS=Homo sapiens GN=XPO1 PE=1 SV=1	HUMAN	46	0.8634	0.9885	0.8827	0.983
2892	2.94	3.16	32.1	sp|Q15404|RSU1_HUMAN	Ras suppressor protein 1 OS=Homo sapiens GN=RSU1 PE=1 SV=3	HUMAN	3	0.8635	1.0102	1.0069	0.983
3156	2.14	2.14	34.2	sp|P62308|RUXG_HUMAN	Small nuclear ribonucleoprotein G OS=Homo sapiens GN=SNRPG PE=1 SV=1	HUMAN	4	0.8636	0.9954	1.0918	0.9831
3705	2	2.01	22.5	sp|Q96N66|MBOA7_HUMAN	Lysophospholipid acyltransferase 7 OS=Homo sapiens GN=MBOAT7 PE=1 SV=2	HUMAN	1	0.8638	0.8202	3.1686	0.9831
3062	2.32	3.05	29	sp|Q6UW02|CP20A_HUMAN	Cytochrome P450 20A1 OS=Homo sapiens GN=CYP20A1 PE=1 SV=1	HUMAN	2	0.8639	1.493	0.7261	0.9832
1521	8.52	9.04	51.9	sp|Q9BUL8|PDC10_HUMAN	Programmed cell death protein 10 OS=Homo sapiens GN=PDCD10 PE=1 SV=1	HUMAN	7	0.864	1.2219	0.9043	0.9832
4355	0.24	0.31	43.9	sp|Q6ICG7|YV028_HUMAN	Putative uncharacterized protein LOC100131404 OS=Homo sapiens PE=2 SV=1	HUMAN	0	0.864	1.942	0.6953	0.9833
4938	0.05	0.25	25.4	sp|Q13201|MMRN1_HUMAN	Multimerin-1 OS=Homo sapiens GN=MMRN1 PE=1 SV=3	HUMAN	0	0.864	1.942	0.6953	0.9833
1928	6.17	6.22	57.3	sp|Q15126|PMVK_HUMAN	Phosphomevalonate kinase OS=Homo sapiens GN=PMVK PE=1 SV=3	HUMAN	4	0.8641	0.9624	0.8795	0.9834
475	23.15	24.76	53	sp|Q8WVM8|SCFD1_HUMAN	Sec1 family domain-containing protein 1 OS=Homo sapiens GN=SCFD1 PE=1 SV=4	HUMAN	14	0.8642	1.0433	0.8698	0.9835
4211	0.44	0.48	15	sp|Q9Y6I4|UBP3_HUMAN	Ubiquitin carboxyl-terminal hydrolase 3 OS=Homo sapiens GN=USP3 PE=1 SV=2	HUMAN	0	0.8643	0.9779	0.8891	0.9836
3684	2	2.02	8	sp|Q6UUV9|CRTC1_HUMAN	CREB-regulated transcription coactivator 1 OS=Homo sapiens GN=CRTC1 PE=1 SV=2	HUMAN	1	0.8643	1.0495	1.0597	0.9837
4	156.76	157.14	63.5	sp|Q9Y490|TLN1_HUMAN	Talin-1 OS=Homo sapiens GN=TLN1 PE=1 SV=3	HUMAN	140	0.8645	0.9677	0.8666	0.9839
2080	5.89	5.97	29.8	sp|Q9NYR9|KBRS2_HUMAN	NF-kappa-B inhibitor-interacting Ras-like protein 2 OS=Homo sapiens GN=NKIRAS2 PE=1 SV=1	HUMAN	3	0.8645	1.0609	0.8139	0.9839
1164	11.66	12.8	44.5	sp|Q9BZE4|NOG1_HUMAN	Nucleolar GTP-binding protein 1 OS=Homo sapiens GN=GTPBP4 PE=1 SV=3	HUMAN	7	0.8645	1.1108	0.8608	0.9839
1226	10.94	11.2	26.6	sp|Q7Z417|NUFP2_HUMAN	Nuclear fragile X mental retardation-interacting protein 2 OS=Homo sapiens GN=NUFIP2 PE=1 SV=1	HUMAN	6	0.8647	0.9624	0.778	0.9839
1805	6.88	8.54	30.8	sp|Q5TAQ9|DCAF8_HUMAN	DDB1- and CUL4-associated factor 8 OS=Homo sapiens GN=DCAF8 PE=1 SV=1	HUMAN	6	0.8647	1.1056	0.8124	0.984
28	90.14	92.49	78.3	sp|P20700|LMNB1_HUMAN	Lamin-B1 OS=Homo sapiens GN=LMNB1 PE=1 SV=2	HUMAN	82	0.8647	1.0247	0.9115	0.9842
368	27.14	28.19	65.4	sp|P27695|APEX1_HUMAN	DNA-(apurinic or apyrimidinic site) lyase OS=Homo sapiens GN=APEX1 PE=1 SV=2	HUMAN	20	0.8647	1.1063	0.8517	0.9843
545	21.2	23.54	39.5	sp|P16885|PLCG2_HUMAN	1-phosphatidylinositol 4,5-bisphosphate phosphodiesterase gamma-2 OS=Homo sapiens GN=PLCG2 PE=1 SV=4	HUMAN	16	0.8647	0.9993	0.9485	0.9843
3761	1.92	2.2	31.5	sp|P50148|GNAQ_HUMAN	Guanine nucleotide-binding protein G(q) subunit alpha OS=Homo sapiens GN=GNAQ PE=1 SV=4	HUMAN	1	0.8647	0.8042	1.3428	0.9844
2294	4.73	5.88	20.7	sp|Q99700|ATX2_HUMAN	Ataxin-2 OS=Homo sapiens GN=ATXN2 PE=1 SV=2	HUMAN	4	0.8648	0.9374	0.8943	0.9846
433	24.81	25.82	69.1	sp|P55263|ADK_HUMAN	Adenosine kinase OS=Homo sapiens GN=ADK PE=1 SV=2	HUMAN	19	0.8649	0.9368	0.86	0.9847
688	18.19	19.28	43.5	sp|P09543|CN37_HUMAN	2',3'-cyclic-nucleotide 3'-phosphodiesterase OS=Homo sapiens GN=CNP PE=1 SV=2	HUMAN	11	0.8649	0.9722	0.8922	0.9847
2504	4.03	4.6	26.2	sp|Q4G0F5|VP26B_HUMAN	Vacuolar protein sorting-associated protein 26B OS=Homo sapiens GN=VPS26B PE=1 SV=2	HUMAN	3	0.865	0.9015	0.8398	0.9848
659	18.69	19.79	32.8	sp|O75165|DJC13_HUMAN	DnaJ homolog subfamily C member 13 OS=Homo sapiens GN=DNAJC13 PE=1 SV=5	HUMAN	14	0.8651	0.8765	0.9202	0.985
3675	2	2.02	62	sp|Q96EY8|MMAB_HUMAN	Cob(I)yrinic acid a,c-diamide adenosyltransferase, mitochondrial OS=Homo sapiens GN=MMAB PE=1 SV=1	HUMAN	2	0.8651	1.0583	0.8987	0.985
420	25.24	27.26	73.1	sp|Q13451|FKBP5_HUMAN	Peptidyl-prolyl cis-trans isomerase FKBP5 OS=Homo sapiens GN=FKBP5 PE=1 SV=2	HUMAN	17	0.8651	1.0925	0.9695	0.9851
1837	6.64	7.53	35.5	sp|Q16719|KYNU_HUMAN	Kynureninase OS=Homo sapiens GN=KYNU PE=1 SV=1	HUMAN	4	0.8652	1.0903	0.797	0.9851
5	156.28	156.54	50.5	sp|P78527|PRKDC_HUMAN	DNA-dependent protein kinase catalytic subunit OS=Homo sapiens GN=PRKDC PE=1 SV=3	HUMAN	143	0.8652	1.0017	0.908	0.9852
1237	10.82	11.45	36.4	sp|Q9Y2U8|MAN1_HUMAN	Inner nuclear membrane protein Man1 OS=Homo sapiens GN=LEMD3 PE=1 SV=2	HUMAN	7	0.8653	0.8283	1.1231	0.9852
[truncated: 3,005 more rows]

## Sheet: 24-hr quercetin treatment
Specific Qercetin targets identified using ICABPP approach after 24-hr quercetin treatment. All the proteins listed below were identified and quantified by at least two peptides. These proteins were all enriched two times by the quercetin probe compared to DMSO‐treated control.
N	Unused	Total	% Cov	Accession #	Name	Species	Peptides(95%)	119:117	121:117	119:118	121:118
4495	0.14	0.43	20	sp|Q03426|KIME_HUMAN	Mevalonate kinase OS=Homo sapiens GN=MVK PE=1 SV=1	HUMAN	0	0.01	0.01	0.8784	0.01
4773	0.07	0.2	26.6	RRRRRsp|P11277|SPTB1_HUMAN	REVERSED Spectrin beta chain, erythrocytic OS=Homo sapiens GN=SPTB PE=1 SV=5	HUMAN	0	0.01	0.01	1.9155	0.01
4305	0.29	1.76	31.4	sp|Q8IWB9|TEX2_HUMAN	Testis-expressed sequence 2 protein OS=Homo sapiens GN=TEX2 PE=1 SV=2	HUMAN	2	0.1331	0.01	0.7388	0.01
3350	2.01	7.57	42.9	sp|Q06787|FMR1_HUMAN	Fragile X mental retardation protein 1 OS=Homo sapiens GN=FMR1 PE=1 SV=1	HUMAN	4	0.1687	0.023	0.7121	0.0166
3508	2	2.38	49.9	sp|Q96L58|B3GT6_HUMAN	Beta-1,3-galactosyltransferase 6 OS=Homo sapiens GN=B3GALT6 PE=2 SV=2	HUMAN	1	0.2222	0.6242	0.6055	0.1383
4098	0.7	0.85	27.8	sp|Q96IR7|HPDL_HUMAN	4-hydroxyphenylpyruvate dioxygenase-like protein OS=Homo sapiens GN=HPDL PE=1 SV=1	HUMAN	1	0.2248	0.2524	0.7994	0.1444
4341	0.25	0.57	37.3	sp|Q96BJ3|AIDA_HUMAN	Axin interactor, dorsalization-associated protein OS=Homo sapiens GN=AIDA PE=1 SV=1	HUMAN	0	0.2597	0.1652	0.6037	0.16
3587	2	2.11	33.1	sp|Q9H0R6|GATA_HUMAN	Glutamyl-tRNA(Gln) amidotransferase subunit A, mitochondrial OS=Homo sapiens GN=QRSL1 PE=1 SV=2	HUMAN	2	0.2862	0.3799	0.8676	0.1639
3556	2	2.19	22.9	sp|Q9HBG6|IF122_HUMAN	Intraflagellar transport protein 122 homolog OS=Homo sapiens GN=IFT122 PE=1 SV=2	HUMAN	1	0.2869	0.2586	0.9226	0.1877
4994	0.05	0.06	36.1	RRRRRsp|Q96LW2|SG494_HUMAN	REVERSED Uncharacterized serine/threonine-protein kinase SgK494 OS=Homo sapiens GN=SGK494 PE=2 SV=1	HUMAN	0	0.2882	0.3305	0.7136	0.188
3725	2	2.01	9.9	sp|Q9UBV8|PEF1_HUMAN	Peflin OS=Homo sapiens GN=PEF1 PE=1 SV=1	HUMAN	1	0.2943	0.1855	1.6899	0.2261
3584	2	2.12	28.8	sp|Q9HC36|RMTL1_HUMAN	RNA methyltransferase-like protein 1 OS=Homo sapiens GN=RNMTL1 PE=1 SV=2	HUMAN	1	0.3093	0.4019	0.4542	0.2382
3493	2	2.43	32.6	sp|P42331|RHG25_HUMAN	Rho GTPase-activating protein 25 OS=Homo sapiens GN=ARHGAP25 PE=1 SV=2	HUMAN	1	0.3328	2.5334	1.0453	0.2639
3569	2	2.16	46.8	sp|O95249|GOSR1_HUMAN	Golgi SNAP receptor complex member 1 OS=Homo sapiens GN=GOSR1 PE=1 SV=1	HUMAN	1	0.3385	0.5299	0.5795	0.2791
2992	2.5	4.83	28.5	sp|Q8IWA4|MFN1_HUMAN	Mitofusin-1 OS=Homo sapiens GN=MFN1 PE=1 SV=2	HUMAN	3	0.3495	1.5112	1.0388	0.2947
3366	2.01	2.61	24.7	sp|Q8N1G0|ZN687_HUMAN	Zinc finger protein 687 OS=Homo sapiens GN=ZNF687 PE=1 SV=1	HUMAN	1	0.3542	0.2617	0.8872	0.302
3273	2.03	2.37	23.6	sp|Q9UI26|IPO11_HUMAN	Importin-11 OS=Homo sapiens GN=IPO11 PE=1 SV=1	HUMAN	1	0.3545	1.0999	0.2973	0.3056
3720	2	2.01	17	sp|Q49AR2|CE022_HUMAN	UPF0489 protein C5orf22 OS=Homo sapiens GN=C5orf22 PE=1 SV=2	HUMAN	1	0.382	1.2616	0.8246	0.3146
4513	0.14	0.16	34.2	RRRRRsp|Q92484|ASM3A_HUMAN	REVERSED Acid sphingomyelinase-like phosphodiesterase 3a OS=Homo sapiens GN=SMPDL3A PE=1 SV=2	HUMAN	0	0.3854	1.1845	0.3211	0.3179
4706	0.08	0.29	34.6	RRRRRsp|O60763|USO1_HUMAN	REVERSED General vesicular transport factor p115 OS=Homo sapiens GN=USO1 PE=1 SV=2	HUMAN	0	0.3895	0.4236	0.5062	0.3266
3392	2.01	2.27	47.6	sp|Q15554|TERF2_HUMAN	Telomeric repeat-binding factor 2 OS=Homo sapiens GN=TERF2 PE=1 SV=2	HUMAN	1	0.3949	0.5017	1.3237	0.3298
3941	1.22	1.34	30.9	sp|Q9Y2I7|FYV1_HUMAN	1-phosphatidylinositol 3-phosphate 5-kinase OS=Homo sapiens GN=PIKFYVE PE=1 SV=3	HUMAN	1	0.4073	0.312	1.9524	0.3331
3833	1.66	1.78	25.7	sp|Q5T0D9|TPRGL_HUMAN	Tumor protein p63-regulated gene 1-like protein OS=Homo sapiens GN=TPRG1L PE=1 SV=1	HUMAN	1	0.4078	0.973	0.6801	0.3423
3293	2.03	2.03	17.5	sp|Q99622|C10_HUMAN	Protein C10 OS=Homo sapiens GN=C12orf57 PE=1 SV=1	HUMAN	1	0.4299	0.5107	0.354	0.3489
1007	13.51	14.23	46.4	sp|Q9H0L4|CSTFT_HUMAN	Cleavage stimulation factor subunit 2 tau variant OS=Homo sapiens GN=CSTF2T PE=1 SV=1	HUMAN	12	0.4367	0.5796	0.4434	0.3563
3012	2.46	2.76	39.7	sp|P68402|PA1B2_HUMAN	Platelet-activating factor acetylhydrolase IB subunit beta OS=Homo sapiens GN=PAFAH1B2 PE=1 SV=1	HUMAN	4	0.4389	0.297	1.0129	0.3595
4317	0.28	0.57	23.9	sp|Q9H857|NT5D2_HUMAN	5'-nucleotidase domain-containing protein 2 OS=Homo sapiens GN=NT5DC2 PE=1 SV=1	HUMAN	0	0.4391	0.4837	0.657	0.3651
3852	1.59	1.64	36.8	sp|P60520|GBRL2_HUMAN	Gamma-aminobutyric acid receptor-associated protein-like 2 OS=Homo sapiens GN=GABARAPL2 PE=1 SV=1	HUMAN	1	0.4467	0.3945	0.6232	0.3672
4991	0.05	0.08	55.4	RRRRRsp|Q9H0P0|5NT3_HUMAN	REVERSED Cytosolic 5'-nucleotidase 3 OS=Homo sapiens GN=NT5C3 PE=1 SV=3	HUMAN	0	0.4508	0.9706	2.985	0.368
3183	2.1	2.18	21	sp|P14384|CBPM_HUMAN	Carboxypeptidase M OS=Homo sapiens GN=CPM PE=1 SV=2	HUMAN	1	0.4613	0.4302	1.0705	0.3788
4003	0.99	1.02	14.5	sp|Q5T011|SZT2_HUMAN	Protein SZT2 OS=Homo sapiens GN=SZT2 PE=2 SV=3	HUMAN	2	0.4829	0.4969	0.615	0.3823
3542	2	2.22	24.2	sp|O94782|UBP1_HUMAN	Ubiquitin carboxyl-terminal hydrolase 1 OS=Homo sapiens GN=USP1 PE=1 SV=1	HUMAN	2	0.4885	0.4014	0.2774	0.3882
4125	0.64	0.96	17.2	RRRRRsp|Q9C0B9|ZCHC2_HUMAN	REVERSED Zinc finger CCHC domain-containing protein 2 OS=Homo sapiens GN=ZCCHC2 PE=1 SV=6	HUMAN	1	0.4897	5.7812	0.01	0.3902
2478	4.05	4.53	32.2	sp|P61009|SPCS3_HUMAN	Signal peptidase complex subunit 3 OS=Homo sapiens GN=SPCS3 PE=1 SV=1	HUMAN	3	0.4918	0.3106	1.6937	0.3954
4335	0.26	0.36	20.6	sp|O95857|TSN13_HUMAN	Tetraspanin-13 OS=Homo sapiens GN=TSPAN13 PE=2 SV=1	HUMAN	0	0.4948	0.5033	0.5061	0.3961
3868	1.51	1.79	19.2	sp|Q9HCE0|EPG5_HUMAN	Ectopic P granules protein 5 homolog OS=Homo sapiens GN=EPG5 PE=2 SV=2	HUMAN	2	0.5002	2.6926	0.2044	0.3981
4079	0.76	0.81	27.3	sp|Q8IUF8|MINA_HUMAN	MYC-induced nuclear antigen OS=Homo sapiens GN=MINA PE=1 SV=1	HUMAN	1	0.5053	0.6781	0.7379	0.4019
2778	3.41	3.42	61.2	sp|Q86WQ0|NR2CA_HUMAN	Nuclear receptor 2C2-associated protein OS=Homo sapiens GN=NR2C2AP PE=1 SV=1	HUMAN	2	0.5083	0.4493	1.1418	0.4021
3994	1.02	1.02	6.7	sp|Q9NS18|GLRX2_HUMAN	Glutaredoxin-2, mitochondrial OS=Homo sapiens GN=GLRX2 PE=1 SV=1	HUMAN	1	0.511	1.5509	0.5573	0.4083
3441	2.01	2.04	28.2	sp|Q9H981|ARP8_HUMAN	Actin-related protein 8 OS=Homo sapiens GN=ACTR8 PE=1 SV=2	HUMAN	1	0.5122	0.6544	0.5637	0.4116
3766	1.92	2.02	41	sp|Q8WUZ0|BCL7C_HUMAN	B-cell CLL/lymphoma 7 protein family member C OS=Homo sapiens GN=BCL7C PE=1 SV=3	HUMAN	1	0.5147	0.7368	0.165	0.413
4682	0.09	0.11	29.9	sp|Q13360|ZN177_HUMAN	Zinc finger protein 177 OS=Homo sapiens GN=ZNF177 PE=2 SV=4	HUMAN	0	0.5181	0.5883	0.6944	0.4136
3991	1.02	1.06	16.2	sp|O75362|ZN217_HUMAN	Zinc finger protein 217 OS=Homo sapiens GN=ZNF217 PE=1 SV=1	HUMAN	1	0.5367	0.247	1.0966	0.414
4811	0.06	0.93	40.9	RRRRRsp|Q9NS87|KIF15_HUMAN	REVERSED Kinesin-like protein KIF15 OS=Homo sapiens GN=KIF15 PE=1 SV=1	HUMAN	1	0.5383	0.9137	0.5005	0.4194
3108	2.21	2.34	23.5	sp|Q8TE77|SSH3_HUMAN	Protein phosphatase Slingshot homolog 3 OS=Homo sapiens GN=SSH3 PE=1 SV=2	HUMAN	1	0.5415	0.3859	3.2653	0.4225
3511	2	2.36	25.5	sp|Q15650|TRIP4_HUMAN	Activating signal cointegrator 1 OS=Homo sapiens GN=TRIP4 PE=1 SV=4	HUMAN	2	0.5421	0.7828	0.7272	0.4232
4398	0.2	0.37	22.5	sp|Q96N67|DOCK7_HUMAN	Dedicator of cytokinesis protein 7 OS=Homo sapiens GN=DOCK7 PE=1 SV=4	HUMAN	1	0.5471	0.5453	0.615	0.4239
3332	2.02	2.06	16	sp|Q99674|CGRE1_HUMAN	Cell growth regulator with EF hand domain protein 1 OS=Homo sapiens GN=CGREF1 PE=2 SV=2	HUMAN	1	0.5562	0.8443	0.3488	0.4331
4875	0.06	0.09	12.4	sp|O43861|ATP9B_HUMAN	Probable phospholipid-transporting ATPase IIB OS=Homo sapiens GN=ATP9B PE=2 SV=4	HUMAN	0	0.5614	0.5344	0.8919	0.4395
3093	2.25	4.22	22	sp|P52824|DGKQ_HUMAN	Diacylglycerol kinase theta OS=Homo sapiens GN=DGKQ PE=1 SV=2	HUMAN	3	0.5645	0.6636	1.3236	0.4433
3413	2.01	2.17	21.4	sp|Q8NE01|CNNM3_HUMAN	Metal transporter CNNM3 OS=Homo sapiens GN=CNNM3 PE=1 SV=1	HUMAN	1	0.5664	0.6419	0.8696	0.4437
3637	2	2.05	34.5	sp|Q9UEU0|VTI1B_HUMAN	Vesicle transport through interaction with t-SNAREs homolog 1B OS=Homo sapiens GN=VTI1B PE=1 SV=3	HUMAN	1	0.5671	0.2784	2.3687	0.4445
3376	2.01	2.37	19.2	sp|Q8IUR0|TPPC5_HUMAN	Trafficking protein particle complex subunit 5 OS=Homo sapiens GN=TRAPPC5 PE=1 SV=1	HUMAN	2	0.5671	0.426	0.5171	0.4452
4405	0.19	1.23	33.9	sp|Q69YQ0|CYTSA_HUMAN	Cytospin-A OS=Homo sapiens GN=SPECC1L PE=1 SV=2	HUMAN	1	0.5678	0.5242	0.6842	0.4465
3401	2.01	2.24	32	sp|Q8IX18|DHX40_HUMAN	Probable ATP-dependent RNA helicase DHX40 OS=Homo sapiens GN=DHX40 PE=1 SV=2	HUMAN	1	0.5707	0.8595	1.1381	0.4476
4303	0.3	0.49	46.1	sp|Q9Y5V0|ZN706_HUMAN	Zinc finger protein 706 OS=Homo sapiens GN=ZNF706 PE=1 SV=1	HUMAN	0	0.5709	1.3612	1.0521	0.4485
3891	1.42	1.66	20	sp|Q15361|TTF1_HUMAN	Transcription termination factor 1 OS=Homo sapiens GN=TTF1 PE=1 SV=3	HUMAN	1	0.5716	3.0005	0.806	0.4545
2613	4	4.08	29.6	sp|Q01581|HMCS1_HUMAN	Hydroxymethylglutaryl-CoA synthase, cytoplasmic OS=Homo sapiens GN=HMGCS1 PE=1 SV=2	HUMAN	2	0.5748	0.4898	0.3993	0.4549
3583	2	2.12	27.6	sp|Q6PJI9|WDR59_HUMAN	WD repeat-containing protein 59 OS=Homo sapiens GN=WDR59 PE=1 SV=2	HUMAN	1	0.5808	0.5481	0.7431	0.4549
3847	1.62	1.63	55.9	sp|Q15004|PAF15_HUMAN	PCNA-associated factor OS=Homo sapiens GN=KIAA0101 PE=1 SV=1	HUMAN	1	0.5832	0.5914	0.2273	0.4665
3547	2	2.21	24.1	sp|Q9Y251|HPSE_HUMAN	Heparanase OS=Homo sapiens GN=HPSE PE=1 SV=2	HUMAN	1	0.5849	1.1228	0.4268	0.467
2825	3.21	3.45	27.1	sp|Q9UP83|COG5_HUMAN	Conserved oligomeric Golgi complex subunit 5 OS=Homo sapiens GN=COG5 PE=1 SV=3	HUMAN	2	0.5921	0.9139	0.6323	0.4689
3593	2	2.1	22.5	sp|Q8NCG7|DGLB_HUMAN	Sn1-specific diacylglycerol lipase beta OS=Homo sapiens GN=DAGLB PE=1 SV=2	HUMAN	1	0.593	0.8543	1.4124	0.4714
2629	4	4.04	20	sp|Q9BUT9|F195A_HUMAN	Protein FAM195A OS=Homo sapiens GN=FAM195A PE=1 SV=2	HUMAN	2	0.5932	0.7731	0.6239	0.4737
3550	2	2.21	20.4	sp|Q9BXJ8|T120A_HUMAN	Transmembrane protein 120A OS=Homo sapiens GN=TMEM120A PE=2 SV=1	HUMAN	1	0.5933	1.2604	0.8917	0.48
4889	0.06	0.07	16.9	sp|Q9Y3B2|EXOS1_HUMAN	Exosome complex component CSL4 OS=Homo sapiens GN=EXOSC1 PE=1 SV=1	HUMAN	0	0.595	0.7411	1.1789	0.4854
3189	2.09	2.36	21.3	sp|Q15048|LRC14_HUMAN	Leucine-rich repeat-containing protein 14 OS=Homo sapiens GN=LRRC14 PE=2 SV=1	HUMAN	1	0.5964	0.6763	0.7275	0.4973
3652	2	2.04	22.3	sp|Q6EEV4|GL1AD_HUMAN	DNA-directed RNA polymerase II subunit GRINL1A, isoforms 4/5 OS=Homo sapiens GN=POLR2M PE=2 SV=1	HUMAN	1	0.5992	0.4813	1.0839	0.5027
3053	2.35	2.41	9.7	sp|Q9H8P0|PORED_HUMAN	Polyprenol reductase OS=Homo sapiens GN=SRD5A3 PE=1 SV=1	HUMAN	1	0.6005	0.4729	0.8081	0.5083
4185	0.49	0.86	35.2	sp|Q5T3J3|LRIF1_HUMAN	Ligand-dependent nuclear receptor-interacting factor 1 OS=Homo sapiens GN=LRIF1 PE=1 SV=1	HUMAN	1	0.6048	0.5318	0.394	0.5138
3218	2.06	3.4	43.5	sp|O14777|NDC80_HUMAN	Kinetochore protein NDC80 homolog OS=Homo sapiens GN=NDC80 PE=1 SV=1	HUMAN	3	0.6082	1.1572	0.3666	0.5169
2993	2.5	2.97	42.1	sp|Q96AX1|VP33A_HUMAN	Vacuolar protein sorting-associated protein 33A OS=Homo sapiens GN=VPS33A PE=1 SV=1	HUMAN	2	0.6096	0.8691	0.4999	0.5173
3338	2.02	2.03	35.6	sp|Q32NB8|PGPS1_HUMAN	CDP-diacylglycerol--glycerol-3-phosphate 3-phosphatidyltransferase, mitochondrial OS=Homo sapiens GN=PGS1 PE=2 SV=1	HUMAN	1	0.6113	0.9291	0.6107	0.5261
2442	4.11	5.32	36.8	sp|O94964|SOGA1_HUMAN	Protein SOGA1 OS=Homo sapiens GN=SOGA1 PE=1 SV=2	HUMAN	3	0.6116	0.8229	0.5536	0.5279
3821	1.69	2.91	19.6	sp|Q5ST30|SYVM_HUMAN	Valine--tRNA ligase, mitochondrial OS=Homo sapiens GN=VARS2 PE=1 SV=2	HUMAN	2	0.6133	0.6592	1.1467	0.5309
3327	2.02	2.08	26.3	sp|Q03188|CENPC_HUMAN	Centromere protein C 1 OS=Homo sapiens GN=CENPC1 PE=1 SV=2	HUMAN	1	0.6147	1.0664	0.8917	0.5361
2656	4	4	24.8	sp|Q9NR33|DPOE4_HUMAN	DNA polymerase epsilon subunit 4 OS=Homo sapiens GN=POLE4 PE=1 SV=2	HUMAN	2	0.6148	0.602	0.7809	0.5371
4070	0.78	5.17	26.1	sp|Q9Y2H1|ST38L_HUMAN	Serine/threonine-protein kinase 38-like OS=Homo sapiens GN=STK38L PE=1 SV=3	HUMAN	3	0.6158	0.5665	0.9423	0.5371
3791	1.83	1.86	47	sp|P13984|T2FB_HUMAN	General transcription factor IIF subunit 2 OS=Homo sapiens GN=GTF2F2 PE=1 SV=2	HUMAN	2	0.6183	1.1753	0.3253	0.5375
2373	4.33	4.37	30.9	sp|P31350|RIR2_HUMAN	Ribonucleoside-diphosphate reductase subunit M2 OS=Homo sapiens GN=RRM2 PE=1 SV=1	HUMAN	2	0.6191	0.5949	0.7334	0.5376
3524	2	2.29	29.2	sp|Q8NBP0|TTC13_HUMAN	Tetratricopeptide repeat protein 13 OS=Homo sapiens GN=TTC13 PE=2 SV=3	HUMAN	1	0.6225	0.6362	0.3266	0.5392
4047	0.86	0.89	17.6	sp|Q9UK39|NOCT_HUMAN	Nocturnin OS=Homo sapiens GN=CCRN4L PE=2 SV=2	HUMAN	1	0.6233	0.699	1.0228	0.5397
3765	1.92	2.03	17.9	sp|Q03405|UPAR_HUMAN	Urokinase plasminogen activator surface receptor OS=Homo sapiens GN=PLAUR PE=1 SV=1	HUMAN	1	0.6263	0.4159	0.8396	0.5441
3712	2	2.01	32.8	sp|Q9P013|CWC15_HUMAN	Spliceosome-associated protein CWC15 homolog OS=Homo sapiens GN=CWC15 PE=1 SV=2	HUMAN	2	0.6293	0.4893	1.0414	0.5448
4031	0.9	0.93	29.8	sp|Q8N4V1|MMGT1_HUMAN	Membrane magnesium transporter 1 OS=Homo sapiens GN=MMGT1 PE=1 SV=1	HUMAN	2	0.6295	2.2072	0.4128	0.5501
3420	2.01	2.12	40.3	sp|Q86TN4|TRPT1_HUMAN	tRNA 2'-phosphotransferase 1 OS=Homo sapiens GN=TRPT1 PE=1 SV=2	HUMAN	1	0.6304	0.989	0.8294	0.5546
3276	2.03	2.31	25.2	sp|O15360|FANCA_HUMAN	Fanconi anemia group A protein OS=Homo sapiens GN=FANCA PE=1 SV=2	HUMAN	1	0.6339	0.6397	1.3062	0.5548
3370	2.01	2.45	30.2	sp|Q9Y483|MTF2_HUMAN	Metal-response element-binding transcription factor 2 OS=Homo sapiens GN=MTF2 PE=1 SV=2	HUMAN	2	0.6355	0.9725	0.7062	0.5566
4320	0.28	0.52	19.6	sp|Q9BZQ6|EDEM3_HUMAN	ER degradation-enhancing alpha-mannosidase-like 3 OS=Homo sapiens GN=EDEM3 PE=1 SV=2	HUMAN	1	0.6385	1.4341	0.3375	0.5578
4635	0.1	0.14	15.3	sp|Q8NBL1|PGLT1_HUMAN	Protein O-glucosyltransferase 1 OS=Homo sapiens GN=POGLUT1 PE=1 SV=1	HUMAN	0	0.6394	0.3154	1.2606	0.5581
4267	0.34	45.63	67.7	sp|Q9NY65|TBA8_HUMAN	Tubulin alpha-8 chain OS=Homo sapiens GN=TUBA8 PE=1 SV=1	HUMAN	96	0.6418	0.6282	1.0708	0.5581
4121	0.65	0.72	30.1	sp|Q6P179|ERAP2_HUMAN	Endoplasmic reticulum aminopeptidase 2 OS=Homo sapiens GN=ERAP2 PE=1 SV=2	HUMAN	1	0.6422	0.9946	0.6842	0.564
4857	0.06	0.18	23.1	sp|Q63ZE4|S22AA_HUMAN	Solute carrier family 22 member 10 OS=Homo sapiens GN=SLC22A10 PE=2 SV=2	HUMAN	0	0.6425	0.6877	1.2059	0.5646
3797	1.8	2.12	19.5	sp|O60287|NPA1P_HUMAN	Nucleolar pre-ribosomal-associated protein 1 OS=Homo sapiens GN=URB1 PE=1 SV=4	HUMAN	1	0.6431	0.7899	0.6137	0.5666
4637	0.1	0.13	11.1	sp|P35236|PTN7_HUMAN	Tyrosine-protein phosphatase non-receptor type 7 OS=Homo sapiens GN=PTPN7 PE=1 SV=3	HUMAN	0	0.6457	0.9318	0.4597	0.5676
3888	1.44	1.84	19.1	sp|Q7Z3C6|ATG9A_HUMAN	Autophagy-related protein 9A OS=Homo sapiens GN=ATG9A PE=1 SV=3	HUMAN	1	0.6501	0.5434	1.0177	0.5694
2060	6	6	49.1	sp|Q8N5W9|F101B_HUMAN	Protein FAM101B OS=Homo sapiens GN=FAM101B PE=1 SV=1	HUMAN	3	0.6524	0.6907	0.8562	0.571
3686	2	2.02	12.5	sp|Q9NPR9|GP108_HUMAN	Protein GPR108 OS=Homo sapiens GN=GPR108 PE=2 SV=3	HUMAN	1	0.6528	0.5524	0.9997	0.5713
3917	1.32	1.5	25.6	sp|Q96L50|LLR1_HUMAN	Leucine-rich repeat protein 1 OS=Homo sapiens GN=LRR1 PE=1 SV=2	HUMAN	2	0.6541	0.6111	0.7317	0.5724
3005	2.47	11.59	25.3	sp|Q9UHD9|UBQL2_HUMAN	Ubiquilin-2 OS=Homo sapiens GN=UBQLN2 PE=1 SV=2	HUMAN	8	0.656	0.9327	0.7334	0.5733
3824	1.68	1.72	24.5	sp|Q96C90|PP14B_HUMAN	Protein phosphatase 1 regulatory subunit 14B OS=Homo sapiens GN=PPP1R14B PE=1 SV=3	HUMAN	1	0.6564	0.8028	0.926	0.5735
2299	4.72	4.78	44.5	sp|Q13907|IDI1_HUMAN	Isopentenyl-diphosphate Delta-isomerase 1 OS=Homo sapiens GN=IDI1 PE=1 SV=2	HUMAN	3	0.6584	0.5773	0.7559	0.5737
4861	0.06	0.13	20	RRRRRsp|Q8N6M5|ALLC_HUMAN	REVERSED Probable allantoicase OS=Homo sapiens GN=ALLC PE=2 SV=3	HUMAN	0	0.663	0.6737	0.9046	0.5737
3517	2	2.32	30	sp|Q9Y2V7|COG6_HUMAN	Conserved oligomeric Golgi complex subunit 6 OS=Homo sapiens GN=COG6 PE=1 SV=2	HUMAN	1	0.663	0.6058	0.7609	0.5754
2507	4.03	4.4	23.7	sp|Q5T0F9|C2D1B_HUMAN	Coiled-coil and C2 domain-containing protein 1B OS=Homo sapiens GN=CC2D1B PE=1 SV=1	HUMAN	2	0.663	0.7238	1.4619	0.5773
4693	0.08	0.71	22.6	sp|Q8NEM7|FA48A_HUMAN	Protein FAM48A OS=Homo sapiens GN=FAM48A PE=1 SV=2	HUMAN	0	0.6645	0.4885	0.9135	0.5793
3813	1.72	1.76	24.6	sp|Q5XUX1|FBXW9_HUMAN	F-box/WD repeat-containing protein 9 OS=Homo sapiens GN=FBXW9 PE=1 SV=2	HUMAN	1	0.6658	0.7592	1.2616	0.5794
3905	1.37	1.45	47.1	sp|Q8N4H5|TOM5_HUMAN	Mitochondrial import receptor subunit TOM5 homolog OS=Homo sapiens GN=TOMM5 PE=1 SV=1	HUMAN	1	0.6669	2.2011	0.5567	0.5806
4089	0.73	0.8	14.1	sp|Q8NFI3|ENASE_HUMAN	Cytosolic endo-beta-N-acetylglucosaminidase OS=Homo sapiens GN=ENGASE PE=1 SV=1	HUMAN	1	0.6696	0.5961	1.3154	0.582
2743	3.57	3.64	22.1	sp|O95864|FADS2_HUMAN	Fatty acid desaturase 2 OS=Homo sapiens GN=FADS2 PE=1 SV=1	HUMAN	2	0.6704	0.5418	0.4806	0.5829
2303	4.7	4.96	14.6	sp|Q6NYC1|JMJD6_HUMAN	Bifunctional arginine demethylase and lysyl-hydroxylase JMJD6 OS=Homo sapiens GN=JMJD6 PE=1 SV=1	HUMAN	3	0.6706	0.6245	0.8251	0.5873
4377	0.22	0.39	29.6	sp|Q9Y6V7|DDX49_HUMAN	Probable ATP-dependent RNA helicase DDX49 OS=Homo sapiens GN=DDX49 PE=1 SV=1	HUMAN	0	0.6719	7.2193	0.8829	0.5885
4583	0.11	0.41	23.6	sp|Q7Z3U7|MON2_HUMAN	Protein MON2 homolog OS=Homo sapiens GN=MON2 PE=1 SV=2	HUMAN	1	0.6724	0.8965	0.6845	0.5901
3585	2	2.12	27.1	sp|Q8TBB5|KLDC4_HUMAN	Kelch domain-containing protein 4 OS=Homo sapiens GN=KLHDC4 PE=1 SV=1	HUMAN	1	0.6745	1.0395	1.1175	0.5901
3839	1.63	2.1	25.2	sp|Q9ULH0|KDIS_HUMAN	Kinase D-interacting substrate of 220 kDa OS=Homo sapiens GN=KIDINS220 PE=1 SV=3	HUMAN	1	0.675	0.4095	0.8553	0.5904
4150	0.57	0.8	21.1	sp|Q6PCB7|S27A1_HUMAN	Long-chain fatty acid transport protein 1 OS=Homo sapiens GN=SLC27A1 PE=2 SV=1	HUMAN	1	0.6752	0.6276	1.058	0.591
3270	2.03	2.43	28.5	sp|O60563|CCNT1_HUMAN	Cyclin-T1 OS=Homo sapiens GN=CCNT1 PE=1 SV=1	HUMAN	1	0.6762	0.5644	0.9404	0.5914
4867	0.06	0.1	17.5	RRRRRsp|P23467|PTPRB_HUMAN	REVERSED Receptor-type tyrosine-protein phosphatase beta OS=Homo sapiens GN=PTPRB PE=1 SV=3	HUMAN	0	0.6781	0.8565	0.7393	0.594
3240	2.05	2.09	28.8	sp|Q9Y3E7|CHMP3_HUMAN	Charged multivesicular body protein 3 OS=Homo sapiens GN=CHMP3 PE=1 SV=3	HUMAN	1	0.6783	0.7726	1.0089	0.594
3640	2	2.05	15.3	sp|Q9NRW3|ABC3C_HUMAN	Probable DNA dC->dU-editing enzyme APOBEC-3C OS=Homo sapiens GN=APOBEC3C PE=1 SV=2	HUMAN	2	0.6793	0.8959	0.9812	0.5945
3836	1.65	2.39	37.3	sp|Q3SY69|AL1L2_HUMAN	Mitochondrial 10-formyltetrahydrofolate dehydrogenase OS=Homo sapiens GN=ALDH1L2 PE=1 SV=2	HUMAN	1	0.6795	0.9892	0.5197	0.5973
4378	0.22	0.3	20.7	sp|Q6ZRI6|CO039_HUMAN	Uncharacterized protein C15orf39 OS=Homo sapiens GN=C15orf39 PE=1 SV=3	HUMAN	0	0.6796	0.7213	1.1916	0.5982
3892	1.42	1.54	38.5	sp|Q13496|MTM1_HUMAN	Myotubularin OS=Homo sapiens GN=MTM1 PE=1 SV=2	HUMAN	1	0.6799	0.6836	1.0698	0.5986
2918	2.81	3.22	24	sp|Q9NVU0|RPC5_HUMAN	DNA-directed RNA polymerase III subunit RPC5 OS=Homo sapiens GN=POLR3E PE=1 SV=1	HUMAN	2	0.6814	0.5715	1.0177	0.5992
3729	2	2.01	22.7	sp|P20160|CAP7_HUMAN	Azurocidin OS=Homo sapiens GN=AZU1 PE=1 SV=3	HUMAN	1	0.683	1.5508	1.0538	0.5993
2521	4.02	4.18	33.9	sp|Q9NRW7|VPS45_HUMAN	Vacuolar protein sorting-associated protein 45 OS=Homo sapiens GN=VPS45 PE=1 SV=1	HUMAN	2	0.6853	0.7413	1.2907	0.5999
3325	2.02	2.09	31.3	sp|Q96Q05|TPPC9_HUMAN	Trafficking protein particle complex subunit 9 OS=Homo sapiens GN=TRAPPC9 PE=1 SV=2	HUMAN	1	0.6855	0.7221	0.9533	0.6031
3959	1.13	1.3	20.5	sp|Q9BSR8|YIPF4_HUMAN	Protein YIPF4 OS=Homo sapiens GN=YIPF4 PE=1 SV=1	HUMAN	1	0.6874	0.6633	0.8219	0.6036
4145	0.58	0.59	12.8	sp|Q9Y4X5|ARI1_HUMAN	E3 ubiquitin-protein ligase ARIH1 OS=Homo sapiens GN=ARIH1 PE=1 SV=2	HUMAN	1	0.6887	0.5202	1.1528	0.6037
4869	0.06	0.1	38.2	sp|Q9UQB8|BAIP2_HUMAN	Brain-specific angiogenesis inhibitor 1-associated protein 2 OS=Homo sapiens GN=BAIAP2 PE=1 SV=1	HUMAN	0	0.6899	0.7097	0.743	0.6042
2510	4.03	4.07	34.7	sp|P49366|DHYS_HUMAN	Deoxyhypusine synthase OS=Homo sapiens GN=DHPS PE=1 SV=1	HUMAN	3	0.6921	0.682	0.777	0.6043
3411	2.01	2.18	33.6	sp|O95260|ATE1_HUMAN	Arginyl-tRNA--protein transferase 1 OS=Homo sapiens GN=ATE1 PE=1 SV=2	HUMAN	1	0.6948	0.704	0.7807	0.6045
3643	2	2.04	36.2	sp|Q52LR7|EPC2_HUMAN	Enhancer of polycomb homolog 2 OS=Homo sapiens GN=EPC2 PE=1 SV=2	HUMAN	1	0.6949	0.461	1.4849	0.6047
4538	0.13	0.17	13.9	sp|Q9BQ90|KLDC3_HUMAN	Kelch domain-containing protein 3 OS=Homo sapiens GN=KLHDC3 PE=2 SV=1	HUMAN	0	0.6961	0.6098	0.772	0.607
4883	0.06	0.08	23.1	RRRRRsp|Q9NWY4|CD027_HUMAN	REVERSED UPF0609 protein C4orf27 OS=Homo sapiens GN=C4orf27 PE=1 SV=2	HUMAN	0	0.6966	1.1521	0.8955	0.611
3275	2.03	2.33	28.6	sp|Q8IWF6|DEN6A_HUMAN	Protein DENND6A OS=Homo sapiens GN=DENND6A PE=2 SV=1	HUMAN	1	0.6967	1.1177	0.6102	0.6126
5003	0.05	0.05	18.2	sp|Q96DE5|APC16_HUMAN	Anaphase-promoting complex subunit 16 OS=Homo sapiens GN=ANAPC16 PE=1 SV=1	HUMAN	0	0.6967	0.9285	0.7653	0.6131
2659	3.96	3.97	43.4	sp|Q14919|NC2A_HUMAN	Dr1-associated corepressor OS=Homo sapiens GN=DRAP1 PE=1 SV=3	HUMAN	2	0.7003	1.2807	0.6293	0.6165
3215	2.07	2.07	38.6	sp|Q9Y5J9|TIM8B_HUMAN	Mitochondrial import inner membrane translocase subunit Tim8 B OS=Homo sapiens GN=TIMM8B PE=1 SV=1	HUMAN	1	0.7005	0.7763	0.5112	0.6179
4130	0.62	1.14	26.1	sp|Q96QE5|TEFM_HUMAN	Transcription elongation factor, mitochondrial OS=Homo sapiens GN=TEFM PE=1 SV=1	HUMAN	2	0.7011	0.809	0.9896	0.6203
3874	1.5	1.5	37.7	sp|Q9UHR6|ZNHI2_HUMAN	Zinc finger HIT domain-containing protein 2 OS=Homo sapiens GN=ZNHIT2 PE=1 SV=1	HUMAN	1	0.7036	0.5539	1.0063	0.6214
2082	5.88	6.41	20.7	sp|O15127|SCAM2_HUMAN	Secretory carrier-associated membrane protein 2 OS=Homo sapiens GN=SCAMP2 PE=1 SV=2	HUMAN	3	0.704	0.6522	0.9025	0.6235
4148	0.57	0.95	27.9	sp|A1A4S6|RHG10_HUMAN	Rho GTPase-activating protein 10 OS=Homo sapiens GN=ARHGAP10 PE=1 SV=1	HUMAN	1	0.7043	0.7251	0.6384	0.6238
3059	2.34	2.48	25.3	sp|Q53H47|SETMR_HUMAN	Histone-lysine N-methyltransferase SETMAR OS=Homo sapiens GN=SETMAR PE=1 SV=1	HUMAN	2	0.7044	1.0982	1.1167	0.6238
3691	2	2.02	17.9	sp|Q96HR9|REEP6_HUMAN	Receptor expression-enhancing protein 6 OS=Homo sapiens GN=REEP6 PE=1 SV=1	HUMAN	1	0.7052	1.301	0.7123	0.6248
4084	0.74	0.77	29.8	sp|Q9NWK9|BCD1_HUMAN	Box C/D snoRNA protein 1 OS=Homo sapiens GN=ZNHIT6 PE=1 SV=1	HUMAN	1	0.7079	0.852	0.7021	0.6252
4253	0.37	0.42	20.1	sp|Q6PK04|CC137_HUMAN	Coiled-coil domain-containing protein 137 OS=Homo sapiens GN=CCDC137 PE=1 SV=1	HUMAN	1	0.7082	0.6061	1.2973	0.6254
3232	2.05	2.22	25.5	sp|Q8N201|INT1_HUMAN	Integrator complex subunit 1 OS=Homo sapiens GN=INTS1 PE=1 SV=2	HUMAN	1	0.7123	0.9919	1.3443	0.6254
4092	0.72	0.77	14	sp|Q13485|SMAD4_HUMAN	Mothers against decapentaplegic homolog 4 OS=Homo sapiens GN=SMAD4 PE=1 SV=1	HUMAN	1	0.7126	0.6925	0.9987	0.6259
2245	4.97	5.15	29.9	sp|Q8N3D4|EH1L1_HUMAN	EH domain-binding protein 1-like protein 1 OS=Homo sapiens GN=EHBP1L1 PE=1 SV=2	HUMAN	3	0.7131	0.802	0.9897	0.6281
1641	8	8	25.6	sp|P40306|PSB10_HUMAN	Proteasome subunit beta type-10 OS=Homo sapiens GN=PSMB10 PE=1 SV=1	HUMAN	4	0.7131	0.6248	1.0389	0.6295
3608	2	2.08	34.7	sp|Q9HBI0|PARVG_HUMAN	Gamma-parvin OS=Homo sapiens GN=PARVG PE=2 SV=1	HUMAN	1	0.7136	0.6855	0.8946	0.6312
3730	2	2.01	34.2	sp|Q9Y5U9|IR3IP_HUMAN	Immediate early response 3-interacting protein 1 OS=Homo sapiens GN=IER3IP1 PE=1 SV=1	HUMAN	1	0.7164	0.6537	1.0589	0.6319
3357	2.01	3.65	32	sp|P30260|CDC27_HUMAN	Cell division cycle protein 27 homolog OS=Homo sapiens GN=CDC27 PE=1 SV=2	HUMAN	2	0.7189	1.2899	1.1386	0.6336
4871	0.06	0.1	16.4	sp|Q9NUK0|MBNL3_HUMAN	Muscleblind-like protein 3 OS=Homo sapiens GN=MBNL3 PE=2 SV=2	HUMAN	2	0.7212	1.0931	0.9398	0.6338
3254	2.04	2.15	24.7	sp|Q9NZM5|GSCR2_HUMAN	Glioma tumor suppressor candidate region gene 2 protein OS=Homo sapiens GN=GLTSCR2 PE=1 SV=2	HUMAN	1	0.7215	0.8096	0.8583	0.6372
155	45.72	46.89	63.8	sp|P60842|IF4A1_HUMAN	Eukaryotic initiation factor 4A-I OS=Homo sapiens GN=EIF4A1 PE=1 SV=1	HUMAN	46	0.7221	0.6794	0.6781	0.6379
2560	4.01	4.08	18.2	sp|Q6ZW49|PAXI1_HUMAN	PAX-interacting protein 1 OS=Homo sapiens GN=PAXIP1 PE=1 SV=2	HUMAN	2	0.7221	0.5409	0.7213	0.6391
3391	2.01	2.28	48.3	sp|Q7Z2W9|RM21_HUMAN	39S ribosomal protein L21, mitochondrial OS=Homo sapiens GN=MRPL21 PE=1 SV=2	HUMAN	1	0.7223	0.683	0.8394	0.6401
4684	0.09	0.1	14.4	sp|Q8TC05|MDM1_HUMAN	Nuclear protein MDM1 OS=Homo sapiens GN=MDM1 PE=1 SV=2	HUMAN	0	0.7232	1.4772	0.9032	0.641
2964	2.6	2.94	21.5	sp|Q15047|SETB1_HUMAN	Histone-lysine N-methyltransferase SETDB1 OS=Homo sapiens GN=SETDB1 PE=1 SV=1	HUMAN	4	0.7235	1.1608	0.7628	0.6414
2221	5.1	5.24	35.2	sp|O94766|B3GA3_HUMAN	Galactosylgalactosylxylosylprotein 3-beta-glucuronosyltransferase 3 OS=Homo sapiens GN=B3GAT3 PE=1 SV=2	HUMAN	3	0.7242	0.6714	0.4723	0.6432
4694	0.08	0.69	17.9	sp|O43567|RNF13_HUMAN	E3 ubiquitin-protein ligase RNF13 OS=Homo sapiens GN=RNF13 PE=1 SV=1	HUMAN	1	0.7246	0.3241	1.2072	0.6434
4752	0.07	0.48	32.1	sp|Q9UGN5|PARP2_HUMAN	Poly [ADP-ribose] polymerase 2 OS=Homo sapiens GN=PARP2 PE=1 SV=2	HUMAN	0	0.7248	1.1263	0.8901	0.6443
4306	0.29	0.64	14.2	RRRRRsp|Q86YH2|Z280B_HUMAN	REVERSED Zinc finger protein 280B OS=Homo sapiens GN=ZNF280B PE=1 SV=2	HUMAN	2	0.7254	1.3166	0.4239	0.6446
3245	2.04	2.99	25.5	sp|P21953|ODBB_HUMAN	2-oxoisovalerate dehydrogenase subunit beta, mitochondrial OS=Homo sapiens GN=BCKDHB PE=1 SV=2	HUMAN	2	0.7269	1.2705	1.0407	0.6449
3575	2	2.14	33.3	sp|Q13505|MTX1_HUMAN	Metaxin-1 OS=Homo sapiens GN=MTX1 PE=1 SV=2	HUMAN	1	0.729	0.8668	0.8973	0.6457
3757	2	2	22.6	sp|Q9NRR3|C42S2_HUMAN	CDC42 small effector protein 2 OS=Homo sapiens GN=CDC42SE2 PE=1 SV=1	HUMAN	1	0.7299	0.7832	0.8919	0.6458
3365	2.01	2.64	24.8	sp|Q6YHU6|THADA_HUMAN	Thyroid adenoma-associated protein OS=Homo sapiens GN=THADA PE=1 SV=1	HUMAN	3	0.7313	0.9666	0.7294	0.6462
2291	4.75	4.78	18.3	sp|P22670|RFX1_HUMAN	MHC class II regulatory factor RFX1 OS=Homo sapiens GN=RFX1 PE=1 SV=2	HUMAN	3	0.7331	0.8867	0.8462	0.6463
3213	2.07	2.14	14.9	sp|Q9H0U3|MAGT1_HUMAN	Magnesium transporter protein 1 OS=Homo sapiens GN=MAGT1 PE=1 SV=1	HUMAN	2	0.7336	0.6553	0.8984	0.6476
4072	0.78	0.85	19.7	sp|Q5BKT4|AG10A_HUMAN	Dol-P-Glc:Glc(2)Man(9)GlcNAc(2)-PP-Dol alpha-1,2-glucosyltransferase OS=Homo sapiens GN=ALG10 PE=1 SV=1	HUMAN	1	0.7337	0.493	1.3177	0.6476
1628	8	8.38	21.4	sp|Q13685|AAMP_HUMAN	Angio-associated migratory cell protein OS=Homo sapiens GN=AAMP PE=1 SV=2	HUMAN	4	0.7337	0.7336	0.7921	0.648
3758	2	2	7.5	sp|P01034|CYTC_HUMAN	Cystatin-C OS=Homo sapiens GN=CST3 PE=1 SV=1	HUMAN	1	0.735	0.6483	0.8093	0.6509
4142	0.58	1.17	46.3	sp|P06746|DPOLB_HUMAN	DNA polymerase beta OS=Homo sapiens GN=POLB PE=1 SV=3	HUMAN	1	0.735	1.2898	0.6109	0.6536
4117	0.65	0.98	24	sp|Q16254|E2F4_HUMAN	Transcription factor E2F4 OS=Homo sapiens GN=E2F4 PE=1 SV=2	HUMAN	2	0.7351	1.2363	0.853	0.6536
3795	1.82	1.84	29.5	sp|Q9NXK8|FXL12_HUMAN	F-box/LRR-repeat protein 12 OS=Homo sapiens GN=FBXL12 PE=1 SV=1	HUMAN	1	0.7359	0.9001	1.0129	0.6547
4158	0.55	0.56	14.1	sp|Q6PII5|HAGHL_HUMAN	Hydroxyacylglutathione hydrolase-like protein OS=Homo sapiens GN=HAGHL PE=2 SV=1	HUMAN	1	0.7371	0.3296	1.8575	0.6553
2024	6.01	6.09	64.9	sp|Q9UK76|HN1_HUMAN	Hematological and neurological expressed 1 protein OS=Homo sapiens GN=HN1 PE=1 SV=3	HUMAN	9	0.7372	0.7122	0.8354	0.6565
4740	0.08	0.08	34.9	sp|Q7Z7K0|COXM1_HUMAN	COX assembly mitochondrial protein homolog OS=Homo sapiens GN=CMC1 PE=1 SV=1	HUMAN	0	0.7374	0.9251	1.0598	0.6575
2285	4.75	5.33	29.1	sp|Q8IYI6|EXOC8_HUMAN	Exocyst complex component 8 OS=Homo sapiens GN=EXOC8 PE=1 SV=2	HUMAN	2	0.7378	0.7931	0.8428	0.6595
3496	2	2.43	19.2	sp|O43292|GPAA1_HUMAN	Glycosylphosphatidylinositol anchor attachment 1 protein OS=Homo sapiens GN=GPAA1 PE=1 SV=3	HUMAN	1	0.7389	0.3914	2.2179	0.6606
3112	2.2	2.38	23.1	sp|Q7Z591|AKNA_HUMAN	AT-hook-containing transcription factor OS=Homo sapiens GN=AKNA PE=1 SV=2	HUMAN	1	0.7397	0.8265	1.6683	0.663
3946	1.18	1.29	28.9	sp|O95470|SGPL1_HUMAN	Sphingosine-1-phosphate lyase 1 OS=Homo sapiens GN=SGPL1 PE=1 SV=3	HUMAN	1	0.7423	0.5099	0.5137	0.6633
3038	2.38	3	21.8	sp|Q8ND04|SMG8_HUMAN	Protein SMG8 OS=Homo sapiens GN=SMG8 PE=1 SV=1	HUMAN	2	0.744	1.2535	0.7697	0.6655
3825	1.68	1.69	28.8	sp|Q9Y240|CLC11_HUMAN	C-type lectin domain family 11 member A OS=Homo sapiens GN=CLEC11A PE=1 SV=1	HUMAN	1	0.7453	0.9252	0.636	0.666
3267	2.03	2.45	34.8	sp|Q9UHD2|TBK1_HUMAN	Serine/threonine-protein kinase TBK1 OS=Homo sapiens GN=TBK1 PE=1 SV=1	HUMAN	1	0.7453	0.6648	1.074	0.666
3473	2	3	16.6	sp|P22681|CBL_HUMAN	E3 ubiquitin-protein ligase CBL OS=Homo sapiens GN=CBL PE=1 SV=2	HUMAN	2	0.7454	0.7263	1.2598	0.6667
4529	0.13	0.32	34	RRRRRsp|Q9H930|LY10L_HUMAN	REVERSED Nuclear body protein SP140-like protein OS=Homo sapiens GN=SP140L PE=2 SV=3	HUMAN	1	0.7456	1.0606	0.688	0.6669
3143	2.16	2.42	26.2	sp|P42226|STAT6_HUMAN	Signal transducer and activator of transcription 6 OS=Homo sapiens GN=STAT6 PE=1 SV=1	HUMAN	1	0.7456	0.9585	0.6626	0.6674
3170	2.11	4.18	26.6	sp|Q9BVV7|TIM21_HUMAN	Mitochondrial import inner membrane translocase subunit Tim21 OS=Homo sapiens GN=TIMM21 PE=1 SV=1	HUMAN	2	0.7457	1.4848	0.9679	0.668
4593	0.11	0.25	21	sp|P54278|PMS2_HUMAN	Mismatch repair endonuclease PMS2 OS=Homo sapiens GN=PMS2 PE=1 SV=2	HUMAN	0	0.7458	0.6104	0.8616	0.6692
2661	3.95	4.19	34	sp|P49137|MAPK2_HUMAN	MAP kinase-activated protein kinase 2 OS=Homo sapiens GN=MAPKAPK2 PE=1 SV=1	HUMAN	3	0.7476	0.6894	0.9411	0.6692
2554	4.01	4.16	26.8	sp|Q5JTD0|TJAP1_HUMAN	Tight junction-associated protein 1 OS=Homo sapiens GN=TJAP1 PE=1 SV=1	HUMAN	2	0.7477	0.702	0.8801	0.6707
4322	0.28	0.29	37	sp|P0DJ07|PT100_HUMAN	Protein PET100 homolog, mitochondrial OS=Homo sapiens GN=PET100 PE=1 SV=1	HUMAN	1	0.748	0.7177	1.0229	0.6709
3816	1.72	1.72	26.7	sp|Q9Y2Y9|KLF13_HUMAN	Krueppel-like factor 13 OS=Homo sapiens GN=KLF13 PE=1 SV=1	HUMAN	1	0.7484	1.4004	0.3225	0.6722
3210	2.07	2.58	22.8	sp|Q9H0H0|INT2_HUMAN	Integrator complex subunit 2 OS=Homo sapiens GN=INTS2 PE=1 SV=2	HUMAN	1	0.7487	0.5761	1.4101	0.6728
3634	2	2.05	35.8	sp|P0C5J1|F86B2_HUMAN	Protein FAM86B2 OS=Homo sapiens GN=FAM86B2 PE=2 SV=1	HUMAN	1	0.7487	0.6043	0.7634	0.6732
4208	0.45	0.48	45.6	sp|P06703|S10A6_HUMAN	Protein S100-A6 OS=Homo sapiens GN=S100A6 PE=1 SV=1	HUMAN	0	0.7491	0.5773	0.8029	0.6738
1741	7.29	7.52	26.1	sp|Q14699|RFTN1_HUMAN	Raftlin OS=Homo sapiens GN=RFTN1 PE=1 SV=4	HUMAN	5	0.7497	0.8483	0.8342	0.6738
1666	7.82	8.08	37.2	sp|P37268|FDFT_HUMAN	Squalene synthase OS=Homo sapiens GN=FDFT1 PE=1 SV=1	HUMAN	4	0.7498	0.8575	0.5392	0.6739
4916	0.05	0.51	29.6	RRRRRsp|P13667|PDIA4_HUMAN	REVERSED Protein disulfide-isomerase A4 OS=Homo sapiens GN=PDIA4 PE=1 SV=2	HUMAN	0	0.7504	0.6051	1.1204	0.6739
4324	0.27	0.37	19.4	RRRRRsp|O75175|CNOT3_HUMAN	REVERSED CCR4-NOT transcription complex subunit 3 OS=Homo sapiens GN=CNOT3 PE=1 SV=1	HUMAN	1	0.7513	0.8496	0.8082	0.6739
2634	4	4.03	37.2	sp|O14618|CCS_HUMAN	Copper chaperone for superoxide dismutase OS=Homo sapiens GN=CCS PE=1 SV=1	HUMAN	2	0.7522	1.2549	0.6257	0.6753
4232	0.4	0.49	23.4	sp|P28749|RBL1_HUMAN	Retinoblastoma-like protein 1 OS=Homo sapiens GN=RBL1 PE=1 SV=3	HUMAN	0	0.7523	0.8257	0.7681	0.6777
4093	0.71	0.99	17.3	sp|Q9BVJ7|DUS23_HUMAN	Dual specificity protein phosphatase 23 OS=Homo sapiens GN=DUSP23 PE=1 SV=1	HUMAN	1	0.7525	0.73	1.2064	0.6789
1957	6.09	8.15	40.1	sp|P35908|K22E_HUMAN	Keratin, type II cytoskeletal 2 epidermal OS=Homo sapiens GN=KRT2 PE=1 SV=2	HUMAN	4	0.7528	1.0273	0.6801	0.6791
3289	2.03	2.06	31.3	sp|Q9HCJ6|VAT1L_HUMAN	Synaptic vesicle membrane protein VAT-1 homolog-like OS=Homo sapiens GN=VAT1L PE=1 SV=2	HUMAN	1	0.7531	0.7726	1.1146	0.6798
2657	3.97	4.76	24.5	sp|Q9ULT0|TTC7A_HUMAN	Tetratricopeptide repeat protein 7A OS=Homo sapiens GN=TTC7A PE=1 SV=3	HUMAN	2	0.7538	0.6832	0.6742	0.68
3470	2	5.13	30.1	sp|Q9Y3L5|RAP2C_HUMAN	Ras-related protein Rap-2c OS=Homo sapiens GN=RAP2C PE=1 SV=1	HUMAN	3	0.7539	0.6807	0.827	0.6806
2248	4.96	5.08	37.7	sp|P52788|SPSY_HUMAN	Spermine synthase OS=Homo sapiens GN=SMS PE=1 SV=2	HUMAN	3	0.7546	0.7731	0.9426	0.6812
3464	2	12.39	58.5	sp|Q92930|RAB8B_HUMAN	Ras-related protein Rab-8B OS=Homo sapiens GN=RAB8B PE=1 SV=2	HUMAN	7	0.7548	1.3559	0.8279	0.6815
4013	0.94	1.4	20.2	sp|Q9H9B1|EHMT1_HUMAN	Histone-lysine N-methyltransferase EHMT1 OS=Homo sapiens GN=EHMT1 PE=1 SV=4	HUMAN	1	0.7556	4.2351	1.0465	0.6829
2594	4	4.23	27.1	sp|P49902|5NTC_HUMAN	Cytosolic purine 5'-nucleotidase OS=Homo sapiens GN=NT5C2 PE=1 SV=1	HUMAN	3	0.7558	0.7691	0.7457	0.6831
3859	1.54	2.05	30.3	sp|Q96RT8|GCP5_HUMAN	Gamma-tubulin complex component 5 OS=Homo sapiens GN=TUBGCP5 PE=1 SV=1	HUMAN	1	0.7564	0.7687	1.0697	0.6837
3355	2.01	3.8	12.6	sp|Q5VZE5|NAA35_HUMAN	N-alpha-acetyltransferase 35, NatC auxiliary subunit OS=Homo sapiens GN=NAA35 PE=1 SV=1	HUMAN	2	0.7601	1.0015	0.9722	0.6845
4194	0.48	0.5	28.2	sp|Q9Y478|AAKB1_HUMAN	5'-AMP-activated protein kinase subunit beta-1 OS=Homo sapiens GN=PRKAB1 PE=1 SV=4	HUMAN	1	0.7615	0.3232	0.7172	0.6847
4228	0.41	0.45	21.5	sp|Q13569|TDG_HUMAN	G/T mismatch-specific thymine DNA glycosylase OS=Homo sapiens GN=TDG PE=1 SV=2	HUMAN	1	0.7623	0.4886	1.4875	0.6849
2703	3.75	3.77	30.8	sp|Q96EE3|SEH1_HUMAN	Nucleoporin SEH1 OS=Homo sapiens GN=SEH1L PE=1 SV=3	HUMAN	3	0.7626	0.6994	0.9278	0.6851
3654	2	2.03	16.3	sp|Q9H6U6|BCAS3_HUMAN	Breast carcinoma-amplified sequence 3 OS=Homo sapiens GN=BCAS3 PE=1 SV=3	HUMAN	1	0.7629	1.2954	0.6613	0.687
4235	0.39	0.83	26.2	sp|P54274|TERF1_HUMAN	Telomeric repeat-binding factor 1 OS=Homo sapiens GN=TERF1 PE=1 SV=3	HUMAN	1	0.7634	0.6164	0.01	0.6872
3247	2.04	2.62	29.2	sp|Q9UHW5|GPN3_HUMAN	GPN-loop GTPase 3 OS=Homo sapiens GN=GPN3 PE=1 SV=2	HUMAN	2	0.7649	1.1728	0.9709	0.6879
1119	12.15	12.49	73.5	sp|Q15080|NCF4_HUMAN	Neutrophil cytosol factor 4 OS=Homo sapiens GN=NCF4 PE=1 SV=2	HUMAN	7	0.7653	0.7923	0.8855	0.689
3253	2.04	2.19	38.7	sp|Q8IVW6|ARI3B_HUMAN	AT-rich interactive domain-containing protein 3B OS=Homo sapiens GN=ARID3B PE=1 SV=2	HUMAN	1	0.7655	1.0643	0.7904	0.6934
2438	4.12	4.5	25	sp|Q96JI7|SPTCS_HUMAN	Spatacsin OS=Homo sapiens GN=SPG11 PE=1 SV=3	HUMAN	3	0.7661	0.8815	0.9703	0.6936
2907	2.86	3.02	37.8	sp|Q93034|CUL5_HUMAN	Cullin-5 OS=Homo sapiens GN=CUL5 PE=1 SV=4	HUMAN	2	0.7661	0.9732	0.7515	0.6938
4330	0.27	0.29	16.7	sp|Q9BUR5|APOO_HUMAN	Apolipoprotein O OS=Homo sapiens GN=APOO PE=1 SV=1	HUMAN	0	0.7662	0.9008	0.9696	0.6938
3301	2.02	2.6	24.9	sp|P56282|DPOE2_HUMAN	DNA polymerase epsilon subunit 2 OS=Homo sapiens GN=POLE2 PE=1 SV=2	HUMAN	1	0.7664	0.9405	0.8791	0.6941
4237	0.39	0.58	22.5	sp|P48449|ERG7_HUMAN	Lanosterol synthase OS=Homo sapiens GN=LSS PE=1 SV=1	HUMAN	1	0.7665	0.5715	1.5711	0.6946
3638	2	2.05	14.1	sp|Q9UGU5|HMGX4_HUMAN	HMG domain-containing protein 4 OS=Homo sapiens GN=HMGXB4 PE=2 SV=2	HUMAN	1	0.7666	0.4995	1.0101	0.6976
2851	3.09	3.22	39.9	sp|Q06546|GABPA_HUMAN	GA-binding protein alpha chain OS=Homo sapiens GN=GABPA PE=1 SV=1	HUMAN	2	0.767	0.7118	0.7668	0.6977
4490	0.15	0.16	6.4	sp|Q8N680|ZBTB2_HUMAN	Zinc finger and BTB domain-containing protein 2 OS=Homo sapiens GN=ZBTB2 PE=1 SV=1	HUMAN	0	0.7671	0.5779	1.778	0.6977
2730	3.62	4.89	35.5	sp|Q9NQX3|GEPH_HUMAN	Gephyrin OS=Homo sapiens GN=GPHN PE=1 SV=1	HUMAN	3	0.7687	1.2004	0.5364	0.6985
4590	0.11	0.27	39.3	RRRRRsp|B0I1T2|MYO1G_HUMAN	REVERSED Unconventional myosin-Ig OS=Homo sapiens GN=MYO1G PE=1 SV=2	HUMAN	0	0.7692	0.9019	0.5985	0.7006
2672	3.9	4.55	27.3	sp|Q460N5|PAR14_HUMAN	Poly [ADP-ribose] polymerase 14 OS=Homo sapiens GN=PARP14 PE=1 SV=3	HUMAN	2	0.7699	0.6292	1.0556	0.7007
2481	4.05	4.37	22.6	sp|Q2TAZ0|ATG2A_HUMAN	Autophagy-related protein 2 homolog A OS=Homo sapiens GN=ATG2A PE=1 SV=3	HUMAN	2	0.7702	0.7861	0.9551	0.701
3463	2	12.39	50.9	sp|P30154|2AAB_HUMAN	Serine/threonine-protein phosphatase 2A 65 kDa regulatory subunit A beta isoform OS=Homo sapiens GN=PPP2R1B PE=1 SV=3	HUMAN	11	0.7703	0.616	0.7283	0.7015
3506	2	2.38	21.4	sp|Q9BWH6|RPAP1_HUMAN	RNA polymerase II-associated protein 1 OS=Homo sapiens GN=RPAP1 PE=1 SV=3	HUMAN	1	0.7704	0.7901	1.517	0.7026
3591	2	2.11	19.5	sp|Q9BVT8|TMUB1_HUMAN	Transmembrane and ubiquitin-like domain-containing protein 1 OS=Homo sapiens GN=TMUB1 PE=1 SV=1	HUMAN	1	0.7708	0.9868	0.9998	0.7032
4449	0.17	0.21	18.1	RRRRRsp|Q7Z340|ZN551_HUMAN	REVERSED Zinc finger protein 551 OS=Homo sapiens GN=ZNF551 PE=1 SV=3	HUMAN	0	0.7709	0.9047	0.7668	0.7037
4242	0.39	0.49	35	sp|Q9UQR0|SCML2_HUMAN	Sex comb on midleg-like protein 2 OS=Homo sapiens GN=SCML2 PE=1 SV=1	HUMAN	1	0.7718	0.786	1.4197	0.7037
3776	1.86	2.03	22.8	sp|O14607|UTY_HUMAN	Histone demethylase UTY OS=Homo sapiens GN=UTY PE=1 SV=2	HUMAN	1	0.7719	0.7635	1.1612	0.7043
870	15.2	18.78	55.4	sp|P78344|IF4G2_HUMAN	Eukaryotic translation initiation factor 4 gamma 2 OS=Homo sapiens GN=EIF4G2 PE=1 SV=1	HUMAN	9	0.7724	0.8134	0.8961	0.7047
2437	4.12	4.6	35.8	sp|Q9H6F5|CCD86_HUMAN	Coiled-coil domain-containing protein 86 OS=Homo sapiens GN=CCDC86 PE=1 SV=1	HUMAN	2	0.7725	1.3455	1.1386	0.707
3645	2	2.04	20.7	sp|P29558|RBMS1_HUMAN	RNA-binding motif, single-stranded-interacting protein 1 OS=Homo sapiens GN=RBMS1 PE=1 SV=3	HUMAN	1	0.7726	0.6494	1.6144	0.7075
2200	5.2	5.4	37.7	sp|P40763|STAT3_HUMAN	Signal transducer and activator of transcription 3 OS=Homo sapiens GN=STAT3 PE=1 SV=2	HUMAN	3	0.7728	1.0083	0.7135	0.7079
2006	6.02	6.81	29.2	sp|Q8NDX1|PSD4_HUMAN	PH and SEC7 domain-containing protein 4 OS=Homo sapiens GN=PSD4 PE=1 SV=2	HUMAN	3	0.7734	0.6456	0.909	0.7085
702	18.02	19.01	40.8	sp|Q06210|GFPT1_HUMAN	Glutamine--fructose-6-phosphate aminotransferase [isomerizing] 1 OS=Homo sapiens GN=GFPT1 PE=1 SV=3	HUMAN	11	0.7741	0.9132	0.9897	0.7096
4581	0.11	0.6	52.2	sp|Q9H0F7|ARL6_HUMAN	ADP-ribosylation factor-like protein 6 OS=Homo sapiens GN=ARL6 PE=1 SV=1	HUMAN	0	0.7747	3.1325	0.2848	0.7121
3011	2.47	2.48	72.3	sp|Q8WVK2|SNR27_HUMAN	U4/U6.U5 small nuclear ribonucleoprotein 27 kDa protein OS=Homo sapiens GN=SNRNP27 PE=1 SV=1	HUMAN	3	0.7747	0.8823	0.91	0.7126
3942	1.21	1.47	21.3	sp|Q96RT1|LAP2_HUMAN	Protein LAP2 OS=Homo sapiens GN=ERBB2IP PE=1 SV=2	HUMAN	1	0.7755	0.7817	0.9024	0.7133
4342	0.25	0.41	34.8	sp|Q9HBE1|PATZ1_HUMAN	POZ-, AT hook-, and zinc finger-containing protein 1 OS=Homo sapiens GN=PATZ1 PE=1 SV=1	HUMAN	0	0.776	0.8636	0.4694	0.714
608	19.82	20.71	35.4	sp|Q8NBJ5|GT251_HUMAN	Procollagen galactosyltransferase 1 OS=Homo sapiens GN=GLT25D1 PE=1 SV=1	HUMAN	17	0.7767	0.7891	0.7873	0.7168
1360	9.95	9.95	62.1	sp|P49006|MRP_HUMAN	MARCKS-related protein OS=Homo sapiens GN=MARCKSL1 PE=1 SV=2	HUMAN	7	0.7771	1.3603	0.6921	0.7169
3697	2	2.02	12.7	sp|Q9UBK9|UXT_HUMAN	Protein UXT OS=Homo sapiens GN=UXT PE=1 SV=1	HUMAN	1	0.7798	0.9306	0.7473	0.7188
2330	4.52	5.11	49.4	sp|Q9NVE7|PANK4_HUMAN	Pantothenate kinase 4 OS=Homo sapiens GN=PANK4 PE=1 SV=1	HUMAN	4	0.7799	0.7135	1.0739	0.7191
3082	2.28	2.5	30.5	sp|Q8TC12|RDH11_HUMAN	Retinol dehydrogenase 11 OS=Homo sapiens GN=RDH11 PE=1 SV=2	HUMAN	1	0.7809	1.1454	0.8355	0.7206
3352	2.01	4.4	28.2	sp|P31483|TIA1_HUMAN	Nucleolysin TIA-1 isoform p40 OS=Homo sapiens GN=TIA1 PE=1 SV=3	HUMAN	2	0.7809	0.9468	0.9188	0.721
1788	6.94	7.44	30.7	sp|O75794|CD123_HUMAN	Cell division cycle protein 123 homolog OS=Homo sapiens GN=CDC123 PE=1 SV=1	HUMAN	4	0.7823	0.7965	1.0704	0.7222
2702	3.75	3.79	38.1	sp|Q9BRG1|VPS25_HUMAN	Vacuolar protein-sorting-associated protein 25 OS=Homo sapiens GN=VPS25 PE=1 SV=1	HUMAN	3	0.7834	0.9774	0.9889	0.7231
307	30.73	33.51	46.4	sp|O75534|CSDE1_HUMAN	Cold shock domain-containing protein E1 OS=Homo sapiens GN=CSDE1 PE=1 SV=2	HUMAN	20	0.7838	0.7474	0.7271	0.7242
2511	4.03	4.04	16.3	sp|O60573|IF4E2_HUMAN	Eukaryotic translation initiation factor 4E type 2 OS=Homo sapiens GN=EIF4E2 PE=1 SV=1	HUMAN	2	0.784	0.8634	0.775	0.7263
2465	4.08	4.08	36.2	sp|Q92643|GPI8_HUMAN	GPI-anchor transamidase OS=Homo sapiens GN=PIGK PE=1 SV=2	HUMAN	2	0.784	0.7594	1.0383	0.7265
1730	7.35	8.1	45.9	sp|Q13492|PICAL_HUMAN	Phosphatidylinositol-binding clathrin assembly protein OS=Homo sapiens GN=PICALM PE=1 SV=2	HUMAN	6	0.7843	0.9126	0.7995	0.7266
1676	7.74	7.86	45.9	sp|Q92979|NEP1_HUMAN	Ribosomal RNA small subunit methyltransferase NEP1 OS=Homo sapiens GN=EMG1 PE=1 SV=4	HUMAN	4	0.7857	0.981	0.8197	0.7268
3024	2.43	2.56	48.8	sp|O96017|CHK2_HUMAN	Serine/threonine-protein kinase Chk2 OS=Homo sapiens GN=CHEK2 PE=1 SV=1	HUMAN	2	0.7858	0.8407	0.8576	0.7275
2797	3.35	3.65	22.6	sp|Q9UBB9|TFP11_HUMAN	Tuftelin-interacting protein 11 OS=Homo sapiens GN=TFIP11 PE=1 SV=1	HUMAN	2	0.7862	0.8243	1.2479	0.7281
2961	2.61	2.72	51.1	sp|Q9H147|TDIF1_HUMAN	Deoxynucleotidyltransferase terminal-interacting protein 1 OS=Homo sapiens GN=DNTTIP1 PE=1 SV=2	HUMAN	2	0.7864	0.4776	1.6951	0.7299
3613	2	2.08	12.2	sp|Q9BYB4|GNB1L_HUMAN	Guanine nucleotide-binding protein subunit beta-like protein 1 OS=Homo sapiens GN=GNB1L PE=1 SV=2	HUMAN	1	0.7883	1.1032	1.0151	0.7308
466	23.42	25.84	47.4	sp|P02786|TFR1_HUMAN	Transferrin receptor protein 1 OS=Homo sapiens GN=TFRC PE=1 SV=2	HUMAN	15	0.7894	0.8248	0.7744	0.7315
4203	0.46	0.52	12.7	sp|Q9Y624|JAM1_HUMAN	Junctional adhesion molecule A OS=Homo sapiens GN=F11R PE=1 SV=1	HUMAN	1	0.7909	1.397	0.9571	0.7318
2310	4.67	4.67	42.7	sp|P32321|DCTD_HUMAN	Deoxycytidylate deaminase OS=Homo sapiens GN=DCTD PE=1 SV=2	HUMAN	3	0.791	0.8401	0.8287	0.7322
4619	0.1	0.3	26.6	sp|Q6AHZ1|Z518A_HUMAN	Zinc finger protein 518A OS=Homo sapiens GN=ZNF518A PE=1 SV=2	HUMAN	0	0.7912	1.0101	1.0646	0.7323
3857	1.55	1.58	39.8	sp|Q9NXF7|DCA16_HUMAN	DDB1- and CUL4-associated factor 16 OS=Homo sapiens GN=DCAF16 PE=1 SV=1	HUMAN	1	0.7915	1.2442	0.809	0.7327
4009	0.96	1.26	28.5	sp|A0JNW5|UH1BL_HUMAN	UHRF1-binding protein 1-like OS=Homo sapiens GN=UHRF1BP1L PE=1 SV=2	HUMAN	2	0.7919	0.8004	0.6191	0.7339
4423	0.18	0.55	24.3	sp|Q96A65|EXOC4_HUMAN	Exocyst complex component 4 OS=Homo sapiens GN=EXOC4 PE=1 SV=1	HUMAN	1	0.7925	1.0905	0.9695	0.734
4817	0.06	0.54	17.9	sp|Q9H8E8|CSR2B_HUMAN	Cysteine-rich protein 2-binding protein OS=Homo sapiens GN=CSRP2BP PE=1 SV=3	HUMAN	0	0.7946	0.723	0.8702	0.7341
1354	10	10.17	33.2	sp|Q9NZL4|HPBP1_HUMAN	Hsp70-binding protein 1 OS=Homo sapiens GN=HSPBP1 PE=1 SV=1	HUMAN	5	0.795	0.8554	0.8231	0.7343
3252	2.04	2.24	24.9	sp|Q9UBW7|ZMYM2_HUMAN	Zinc finger MYM-type protein 2 OS=Homo sapiens GN=ZMYM2 PE=1 SV=1	HUMAN	1	0.7966	1.6121	0.524	0.735
2517	4.02	4.32	40.6	sp|Q8N6T7|SIR6_HUMAN	NAD-dependent protein deacetylase sirtuin-6 OS=Homo sapiens GN=SIRT6 PE=1 SV=2	HUMAN	4	0.7986	0.9482	0.8763	0.7361
2963	2.6	2.98	40.5	sp|O75410|TACC1_HUMAN	Transforming acidic coiled-coil-containing protein 1 OS=Homo sapiens GN=TACC1 PE=1 SV=2	HUMAN	2	0.7987	0.8799	0.6437	0.7364
2147	5.5	5.76	27.9	sp|Q15386|UBE3C_HUMAN	Ubiquitin-protein ligase E3C OS=Homo sapiens GN=UBE3C PE=1 SV=3	HUMAN	4	0.7988	1.2164	0.6013	0.7365
4400	0.2	0.27	24.9	sp|Q9Y3I1|FBX7_HUMAN	F-box only protein 7 OS=Homo sapiens GN=FBXO7 PE=1 SV=1	HUMAN	0	0.7991	0.9044	0.7176	0.7367
222	38.51	40.01	44.6	sp|Q04637|IF4G1_HUMAN	Eukaryotic translation initiation factor 4 gamma 1 OS=Homo sapiens GN=EIF4G1 PE=1 SV=4	HUMAN	33	0.7994	0.7462	0.7688	0.7404
4966	0.05	0.14	13.4	sp|Q6ZRS2|SRCAP_HUMAN	Helicase SRCAP OS=Homo sapiens GN=SRCAP PE=1 SV=3	HUMAN	1	0.7998	0.9794	0.843	0.741
2749	3.55	5.77	40.9	sp|Q02809|PLOD1_HUMAN	Procollagen-lysine,2-oxoglutarate 5-dioxygenase 1 OS=Homo sapiens GN=PLOD1 PE=1 SV=2	HUMAN	3	0.8	0.9359	0.7089	0.7417
4711	0.08	0.27	13.2	sp|Q9UNW9|NOVA2_HUMAN	RNA-binding protein Nova-2 OS=Homo sapiens GN=NOVA2 PE=1 SV=1	HUMAN	0	0.8008	0.6991	1.1606	0.7417
2518	4.02	4.31	53.6	sp|Q9BZX2|UCK2_HUMAN	Uridine-cytidine kinase 2 OS=Homo sapiens GN=UCK2 PE=1 SV=1	HUMAN	2	0.801	0.7652	0.7503	0.7423
2505	4.03	4.58	37.1	sp|Q86YV0|RASL3_HUMAN	RAS protein activator like-3 OS=Homo sapiens GN=RASAL3 PE=1 SV=2	HUMAN	2	0.8011	0.8302	1.2193	0.7431
4649	0.09	2.66	22.9	sp|P32322|P5CR1_HUMAN	Pyrroline-5-carboxylate reductase 1, mitochondrial OS=Homo sapiens GN=PYCR1 PE=1 SV=2	HUMAN	1	0.8011	0.7728	0.8672	0.7432
3269	2.03	2.43	35.4	sp|Q9UL03|INT6_HUMAN	Integrator complex subunit 6 OS=Homo sapiens GN=INTS6 PE=1 SV=1	HUMAN	1	0.8012	1.0389	0.7254	0.7443
4247	0.37	0.63	31	sp|O75298|RTN2_HUMAN	Reticulon-2 OS=Homo sapiens GN=RTN2 PE=1 SV=1	HUMAN	1	0.8015	0.5168	1.8553	0.7443
3131	2.18	2.24	30.6	RRRRRsp|Q8NI60|ADCK3_HUMAN	REVERSED Chaperone activity of bc1 complex-like, mitochondrial OS=Homo sapiens GN=ADCK3 PE=1 SV=1	HUMAN	1	0.8029	1.231	0.2113	0.7445
3223	2.06	2.09	31.5	sp|Q96J02|ITCH_HUMAN	E3 ubiquitin-protein ligase Itchy homolog OS=Homo sapiens GN=ITCH PE=1 SV=2	HUMAN	1	0.8033	1.1028	0.928	0.7457
2987	2.53	2.7	31.7	sp|Q8TCF1|ZFAN1_HUMAN	AN1-type zinc finger protein 1 OS=Homo sapiens GN=ZFAND1 PE=1 SV=1	HUMAN	3	0.8047	0.7385	0.9086	0.7465
4412	0.19	0.28	26.2	RRRRRsp|Q92835|SHIP1_HUMAN	REVERSED Phosphatidylinositol 3,4,5-trisphosphate 5-phosphatase 1 OS=Homo sapiens GN=INPP5D PE=1 SV=2	HUMAN	0	0.8061	0.4842	1.3588	0.7468
3415	2.01	2.17	30.8	sp|O95478|NSA2_HUMAN	Ribosome biogenesis protein NSA2 homolog OS=Homo sapiens GN=NSA2 PE=1 SV=1	HUMAN	1	0.807	0.8067	0.6254	0.7472
4313	0.29	0.35	21.2	sp|O00462|MANBA_HUMAN	Beta-mannosidase OS=Homo sapiens GN=MANBA PE=1 SV=3	HUMAN	1	0.807	0.5851	0.9525	0.7474
2741	3.59	4.51	23	sp|Q9UNS1|TIM_HUMAN	Protein timeless homolog OS=Homo sapiens GN=TIMELESS PE=1 SV=2	HUMAN	2	0.8073	0.7258	1.0957	0.7474
3692	2	2.02	18	sp|Q96EH3|MASU1_HUMAN	Mitochondrial assembly of ribosomal large subunit protein 1 OS=Homo sapiens GN=MALSU1 PE=1 SV=1	HUMAN	1	0.8073	0.8143	1.2097	0.7483
3025	2.43	2.5	23.9	sp|Q13546|RIPK1_HUMAN	Receptor-interacting serine/threonine-protein kinase 1 OS=Homo sapiens GN=RIPK1 PE=1 SV=3	HUMAN	2	0.8075	0.6964	0.8055	0.7493
1756	7.18	9.1	34.1	sp|Q9UKV8|AGO2_HUMAN	Protein argonaute-2 OS=Homo sapiens GN=EIF2C2 PE=1 SV=3	HUMAN	7	0.8081	0.8114	0.9891	0.7497
3051	2.36	2.36	20.1	sp|Q86WC6|PPR27_HUMAN	Protein phosphatase 1 regulatory subunit 27 OS=Homo sapiens GN=PPP1R27 PE=1 SV=1	HUMAN	1	0.8089	0.6839	0.7476	0.7503
2772	3.44	4.16	34.7	sp|Q05086|UBE3A_HUMAN	Ubiquitin-protein ligase E3A OS=Homo sapiens GN=UBE3A PE=1 SV=4	HUMAN	3	0.8097	0.7616	1.2929	0.7504
940	14.22	14.99	52.7	sp|Q9UN86|G3BP2_HUMAN	Ras GTPase-activating protein-binding protein 2 OS=Homo sapiens GN=G3BP2 PE=1 SV=2	HUMAN	9	0.8103	0.7959	0.8544	0.751
4403	0.19	4.45	64.8	sp|Q15819|UB2V2_HUMAN	Ubiquitin-conjugating enzyme E2 variant 2 OS=Homo sapiens GN=UBE2V2 PE=1 SV=4	HUMAN	4	0.8121	0.7159	1.4679	0.7517
1579	8.18	8.2	64.8	sp|Q9UI30|TR112_HUMAN	tRNA methyltransferase 112 homolog OS=Homo sapiens GN=TRMT112 PE=1 SV=1	HUMAN	7	0.813	1.0923	0.8261	0.7521
4108	0.67	0.89	24.6	sp|P40692|MLH1_HUMAN	DNA mismatch repair protein Mlh1 OS=Homo sapiens GN=MLH1 PE=1 SV=1	HUMAN	1	0.813	1.0839	0.6526	0.7522
3848	1.59	3.36	37.7	sp|P52735|VAV2_HUMAN	Guanine nucleotide exchange factor VAV2 OS=Homo sapiens GN=VAV2 PE=1 SV=2	HUMAN	3	0.8132	1.2309	0.7012	0.7529
4172	0.52	0.7	23.4	sp|Q9ULL5|PRR12_HUMAN	Proline-rich protein 12 OS=Homo sapiens GN=PRR12 PE=1 SV=2	HUMAN	1	0.8132	0.9318	1.0061	0.7535
3408	2.01	2.2	40.1	sp|P50750|CDK9_HUMAN	Cyclin-dependent kinase 9 OS=Homo sapiens GN=CDK9 PE=1 SV=3	HUMAN	1	0.8136	0.8072	0.9245	0.7536
2206	5.18	6.63	29.3	sp|Q13315|ATM_HUMAN	Serine-protein kinase ATM OS=Homo sapiens GN=ATM PE=1 SV=3	HUMAN	6	0.8137	1.2546	0.8366	0.7546
3197	2.08	2.62	29.5	sp|Q13111|CAF1A_HUMAN	Chromatin assembly factor 1 subunit A OS=Homo sapiens GN=CHAF1A PE=1 SV=2	HUMAN	1	0.8145	1.0778	1.1231	0.7546
2034	6	6.66	46.9	sp|P80217|IN35_HUMAN	Interferon-induced 35 kDa protein OS=Homo sapiens GN=IFI35 PE=1 SV=5	HUMAN	4	0.8145	0.7707	0.9199	0.7549
3879	1.47	1.57	24.8	sp|Q9Y223|GLCNE_HUMAN	Bifunctional UDP-N-acetylglucosamine 2-epimerase/N-acetylmannosamine kinase OS=Homo sapiens GN=GNE PE=1 SV=1	HUMAN	1	0.8148	0.8886	0.599	0.7565
3619	2	2.07	27.3	sp|P49662|CASP4_HUMAN	Caspase-4 OS=Homo sapiens GN=CASP4 PE=1 SV=1	HUMAN	1	0.8151	1.1333	0.8214	0.757
4804	0.07	0.07	16.4	sp|Q8N6C7|PGSF1_HUMAN	Putative uncharacterized protein encoded by MIR7-3HG OS=Homo sapiens GN=MIR7-3HG PE=5 SV=1	HUMAN	0	0.8151	1.2404	1.3322	0.7573
3153	2.14	2.28	11.4	sp|Q9UBG0|MRC2_HUMAN	C-type mannose receptor 2 OS=Homo sapiens GN=MRC2 PE=1 SV=2	HUMAN	2	0.8152	0.7499	0.995	0.7577
4046	0.86	0.93	40.1	sp|Q6P1N9|TATD1_HUMAN	Putative deoxyribonuclease TATDN1 OS=Homo sapiens GN=TATDN1 PE=1 SV=2	HUMAN	2	0.8155	1.6783	0.3924	0.7593
4844	0.06	0.25	19.9	sp|P49427|UB2R1_HUMAN	Ubiquitin-conjugating enzyme E2 R1 OS=Homo sapiens GN=CDC34 PE=1 SV=2	HUMAN	0	0.8157	1.263	0.7359	0.7598
3306	2.02	2.32	29.3	sp|Q9H1H9|KI13A_HUMAN	Kinesin-like protein KIF13A OS=Homo sapiens GN=KIF13A PE=1 SV=2	HUMAN	1	0.8166	0.7618	1.0984	0.7608
3646	2	2.04	24.3	sp|Q8N1S5|S39AB_HUMAN	Zinc transporter ZIP11 OS=Homo sapiens GN=SLC39A11 PE=2 SV=3	HUMAN	1	0.8177	0.9302	0.9385	0.7611
3006	2.47	2.96	22.2	sp|P41229|KDM5C_HUMAN	Lysine-specific demethylase 5C OS=Homo sapiens GN=KDM5C PE=1 SV=2	HUMAN	3	0.8178	0.7454	0.7621	0.7617
3212	2.07	2.15	27.8	sp|Q9P2W9|STX18_HUMAN	Syntaxin-18 OS=Homo sapiens GN=STX18 PE=1 SV=1	HUMAN	1	0.8185	0.9353	0.9529	0.762
4354	0.24	0.37	19.7	sp|Q9Y6X3|SCC4_HUMAN	MAU2 chromatid cohesion factor homolog OS=Homo sapiens GN=MAU2 PE=1 SV=2	HUMAN	0	0.8185	0.9531	0.8214	0.7624
4106	0.68	0.68	13.9	sp|P82912|RT11_HUMAN	28S ribosomal protein S11, mitochondrial OS=Homo sapiens GN=MRPS11 PE=1 SV=2	HUMAN	1	0.8186	1.5826	1.1171	0.7627
2718	3.68	3.78	32.8	sp|P01137|TGFB1_HUMAN	Transforming growth factor beta-1 OS=Homo sapiens GN=TGFB1 PE=1 SV=2	HUMAN	2	0.8188	1.0655	0.8275	0.7632
2228	5.06	5.12	28.4	sp|Q7L591|DOK3_HUMAN	Docking protein 3 OS=Homo sapiens GN=DOK3 PE=1 SV=2	HUMAN	3	0.8194	0.7952	1.0892	0.7635
2324	4.56	4.84	23.7	sp|Q96DM3|MIC1_HUMAN	Uncharacterized protein C18orf8 OS=Homo sapiens GN=C18orf8 PE=1 SV=2	HUMAN	3	0.8196	0.7623	0.9005	0.7636
2684	3.85	4.12	26.7	sp|Q9H553|ALG2_HUMAN	Alpha-1,3/1,6-mannosyltransferase ALG2 OS=Homo sapiens GN=ALG2 PE=2 SV=1	HUMAN	2	0.8203	0.7893	1.2684	0.7643
3477	2	2.79	25.2	sp|Q96EP0|RNF31_HUMAN	E3 ubiquitin-protein ligase RNF31 OS=Homo sapiens GN=RNF31 PE=1 SV=1	HUMAN	1	0.8203	1.0502	1.2445	0.7649
1913	6.23	6.81	45.9	sp|O00743|PPP6_HUMAN	Serine/threonine-protein phosphatase 6 catalytic subunit OS=Homo sapiens GN=PPP6C PE=1 SV=1	HUMAN	3	0.8206	0.8053	0.9211	0.7652
3498	2	2.43	11	sp|P03886|NU1M_HUMAN	NADH-ubiquinone oxidoreductase chain 1 OS=Homo sapiens GN=MT-ND1 PE=1 SV=1	HUMAN	2	0.8215	1.6377	0.7929	0.7656
3214	2.07	2.09	12.8	sp|Q8WV99|ZFN2B_HUMAN	AN1-type zinc finger protein 2B OS=Homo sapiens GN=ZFAND2B PE=1 SV=1	HUMAN	2	0.8235	0.7415	0.6143	0.7657
1735	7.33	7.43	82.2	sp|P26447|S10A4_HUMAN	Protein S100-A4 OS=Homo sapiens GN=S100A4 PE=1 SV=1	HUMAN	5	0.8252	0.8179	0.8257	0.7659
1923	6.19	7.06	18.1	sp|Q71RC2|LARP4_HUMAN	La-related protein 4 OS=Homo sapiens GN=LARP4 PE=1 SV=3	HUMAN	3	0.8259	0.9427	0.8432	0.7666
4312	0.29	0.35	22	sp|Q13233|M3K1_HUMAN	Mitogen-activated protein kinase kinase kinase 1 OS=Homo sapiens GN=MAP3K1 PE=1 SV=4	HUMAN	1	0.8261	1.2761	0.7672	0.7671
2845	3.11	3.19	44.9	sp|P14598|NCF1_HUMAN	Neutrophil cytosol factor 1 OS=Homo sapiens GN=NCF1 PE=1 SV=3	HUMAN	2	0.8267	1.0703	0.8732	0.7673
1996	6.03	7.41	42.8	sp|Q9BW19|KIFC1_HUMAN	Kinesin-like protein KIFC1 OS=Homo sapiens GN=KIFC1 PE=1 SV=2	HUMAN	3	0.8268	0.8883	1.2367	0.7674
3428	2.01	2.08	24.9	sp|Q96ST2|IWS1_HUMAN	Protein IWS1 homolog OS=Homo sapiens GN=IWS1 PE=1 SV=2	HUMAN	1	0.8269	0.6589	1.1368	0.7676
1328	10.1	10.48	38.8	sp|P23634|AT2B4_HUMAN	Plasma membrane calcium-transporting ATPase 4 OS=Homo sapiens GN=ATP2B4 PE=1 SV=2	HUMAN	7	0.8271	1.0019	0.7438	0.7677
2680	3.86	3.92	23.5	sp|Q9BYK8|PR285_HUMAN	Peroxisomal proliferator-activated receptor A-interacting complex 285 kDa protein OS=Homo sapiens GN=PRIC285 PE=1 SV=6	HUMAN	2	0.8272	0.8634	1.2063	0.7677
2671	3.9	4.65	36.6	sp|O43314|VIP2_HUMAN	Inositol hexakisphosphate and diphosphoinositol-pentakisphosphate kinase 2 OS=Homo sapiens GN=PPIP5K2 PE=1 SV=3	HUMAN	2	0.8275	1.0116	0.9023	0.7682
2061	6	6	43.6	sp|P02655|APOC2_HUMAN	Apolipoprotein C-II OS=Homo sapiens GN=APOC2 PE=1 SV=1	HUMAN	3	0.8275	0.8773	0.457	0.7685
3227	2.05	6.13	45.5	sp|P20338|RAB4A_HUMAN	Ras-related protein Rab-4A OS=Homo sapiens GN=RAB4A PE=1 SV=2	HUMAN	3	0.8275	0.9885	0.9858	0.7685
4809	0.06	1.49	14.8	sp|Q9NP55|BPIA1_HUMAN	BPI fold-containing family A member 1 OS=Homo sapiens GN=BPIFA1 PE=1 SV=1	HUMAN	1	0.8279	1.1744	1.2195	0.7691
2040	6	6.34	22.3	sp|Q6P9B9|INT5_HUMAN	Integrator complex subunit 5 OS=Homo sapiens GN=INTS5 PE=1 SV=1	HUMAN	3	0.828	0.7757	1.0275	0.7694
3198	2.08	2.34	25.9	sp|Q13740|CD166_HUMAN	CD166 antigen OS=Homo sapiens GN=ALCAM PE=1 SV=2	HUMAN	1	0.8281	0.8888	0.9389	0.7697
3764	1.92	2.03	12.5	sp|P15151|PVR_HUMAN	Poliovirus receptor OS=Homo sapiens GN=PVR PE=1 SV=2	HUMAN	1	0.8282	0.6812	0.9233	0.7702
2513	4.02	4.59	26.3	sp|P57678|GEMI4_HUMAN	Gem-associated protein 4 OS=Homo sapiens GN=GEMIN4 PE=1 SV=2	HUMAN	3	0.8284	0.65	1.4587	0.7704
4797	0.07	0.09	16.6	sp|Q8N999|CL029_HUMAN	Uncharacterized protein C12orf29 OS=Homo sapiens GN=C12orf29 PE=1 SV=2	HUMAN	0	0.8291	0.5054	0.8481	0.7706
3380	2.01	2.35	17.6	sp|Q6PJ69|TRI65_HUMAN	Tripartite motif-containing protein 65 OS=Homo sapiens GN=TRIM65 PE=1 SV=3	HUMAN	1	0.8292	0.9982	0.4502	0.7706
3363	2.01	2.69	24.7	sp|Q15283|RASA2_HUMAN	Ras GTPase-activating protein 2 OS=Homo sapiens GN=RASA2 PE=1 SV=2	HUMAN	1	0.8294	0.7648	1.0737	0.7711
3074	2.3	2.36	23	sp|Q9H3M7|TXNIP_HUMAN	Thioredoxin-interacting protein OS=Homo sapiens GN=TXNIP PE=1 SV=1	HUMAN	1	0.8301	0.5271	0.8736	0.7717
2286	4.75	5.05	53.2	sp|O94925|GLSK_HUMAN	Glutaminase kidney isoform, mitochondrial OS=Homo sapiens GN=GLS PE=1 SV=1	HUMAN	6	0.8302	1.0187	0.8434	0.7722
3673	2	2.02	29.1	sp|Q8NBZ7|UXS1_HUMAN	UDP-glucuronic acid decarboxylase 1 OS=Homo sapiens GN=UXS1 PE=1 SV=1	HUMAN	1	0.8305	0.997	0.42	0.7725
3140	2.17	2.21	17.6	sp|Q01658|NC2B_HUMAN	Protein Dr1 OS=Homo sapiens GN=DR1 PE=1 SV=1	HUMAN	1	0.8309	1.0712	0.7901	0.7725
3313	2.02	2.25	41.5	sp|Q14116|IL18_HUMAN	Interleukin-18 OS=Homo sapiens GN=IL18 PE=1 SV=1	HUMAN	1	0.831	1.1802	0.8228	0.7727
4156	0.55	0.62	22.2	sp|Q9H1I8|ASCC2_HUMAN	Activating signal cointegrator 1 complex subunit 2 OS=Homo sapiens GN=ASCC2 PE=1 SV=3	HUMAN	1	0.8311	0.7741	0.7998	0.773
4594	0.11	0.24	51.7	sp|Q9BRK5|CAB45_HUMAN	45 kDa calcium-binding protein OS=Homo sapiens GN=SDF4 PE=1 SV=1	HUMAN	0	0.8316	0.7926	0.9808	0.773
1451	9.12	9.25	59.6	sp|P48729|KC1A_HUMAN	Casein kinase I isoform alpha OS=Homo sapiens GN=CSNK1A1 PE=1 SV=2	HUMAN	7	0.8321	0.8226	0.9236	0.7731
2003	6.03	6.1	48.7	sp|Q9HBM1|SPC25_HUMAN	Kinetochore protein Spc25 OS=Homo sapiens GN=SPC25 PE=1 SV=1	HUMAN	4	0.8321	0.7865	0.7193	0.7732
4065	0.8	0.82	20.6	sp|Q75N03|HAKAI_HUMAN	E3 ubiquitin-protein ligase Hakai OS=Homo sapiens GN=CBLL1 PE=1 SV=1	HUMAN	1	0.8327	0.8729	0.8731	0.7736
4372	0.22	1.37	28.2	sp|Q5T160|SYRM_HUMAN	Probable arginine--tRNA ligase, mitochondrial OS=Homo sapiens GN=RARS2 PE=1 SV=1	HUMAN	1	0.8331	0.8464	0.9244	0.7739
3110	2.21	2.23	47.5	sp|P17568|NDUB7_HUMAN	NADH dehydrogenase [ubiquinone] 1 beta subcomplex subunit 7 OS=Homo sapiens GN=NDUFB7 PE=1 SV=4	HUMAN	2	0.8332	0.7267	1.0012	0.774
2868	3.03	5.43	21.7	sp|Q15032|R3HD1_HUMAN	R3H domain-containing protein 1 OS=Homo sapiens GN=R3HDM1 PE=1 SV=3	HUMAN	4	0.8345	0.7919	0.4727	0.7752
3695	2	2.02	19.2	sp|Q6UWD8|CP054_HUMAN	Transmembrane protein C16orf54 OS=Homo sapiens GN=C16orf54 PE=1 SV=1	HUMAN	1	0.8348	1.1137	0.6826	0.7752
2855	3.08	4.66	42.3	sp|Q15813|TBCE_HUMAN	Tubulin-specific chaperone E OS=Homo sapiens GN=TBCE PE=1 SV=1	HUMAN	4	0.8357	0.8786	0.9923	0.7755
3745	2	2	41.5	sp|Q5J8M3|EMC4_HUMAN	ER membrane protein complex subunit 4 OS=Homo sapiens GN=EMC4 PE=1 SV=2	HUMAN	1	0.8367	0.9967	0.9061	0.7766
2763	3.49	8.94	39	sp|P30466|1B18_HUMAN	HLA class I histocompatibility antigen, B-18 alpha chain OS=Homo sapiens GN=HLA-B PE=1 SV=1	HUMAN	8	0.8369	0.7402	0.97	0.7772
3138	2.17	2.24	28.8	sp|Q9UIS9|MBD1_HUMAN	Methyl-CpG-binding domain protein 1 OS=Homo sapiens GN=MBD1 PE=1 SV=2	HUMAN	1	0.8374	0.7439	1.9968	0.7773
3499	2	2.42	35.3	sp|Q96IV0|NGLY1_HUMAN	Peptide-N(4)-(N-acetyl-beta-glucosaminyl)asparagine amidase OS=Homo sapiens GN=NGLY1 PE=1 SV=1	HUMAN	1	0.8382	0.9158	0.6432	0.7788
2308	4.67	5.1	36.6	sp|Q9H6S0|YTDC2_HUMAN	Probable ATP-dependent RNA helicase YTHDC2 OS=Homo sapiens GN=YTHDC2 PE=1 SV=2	HUMAN	3	0.8389	0.8484	1.0377	0.7796
4266	0.35	0.36	24.6	sp|Q9NX76|CKLF6_HUMAN	CKLF-like MARVEL transmembrane domain-containing protein 6 OS=Homo sapiens GN=CMTM6 PE=1 SV=1	HUMAN	1	0.8391	0.6228	1.32	0.7797
2349	4.43	5.01	25.1	sp|O95870|ABHGA_HUMAN	Abhydrolase domain-containing protein 16A OS=Homo sapiens GN=ABHD16A PE=1 SV=3	HUMAN	4	0.8393	0.8615	1.1154	0.7801
4050	0.83	3	59.6	sp|Q9Y6B6|SAR1B_HUMAN	GTP-binding protein SAR1b OS=Homo sapiens GN=SAR1B PE=1 SV=1	HUMAN	3	0.8397	1.0338	0.554	0.7807
1536	8.44	8.49	93.2	sp|Q15370|ELOB_HUMAN	Transcription elongation factor B polypeptide 2 OS=Homo sapiens GN=TCEB2 PE=1 SV=1	HUMAN	7	0.8399	0.8219	0.8109	0.7808
2860	3.06	3.4	27.7	sp|Q5VW32|BROX_HUMAN	BRO1 domain-containing protein BROX OS=Homo sapiens GN=BROX PE=1 SV=1	HUMAN	3	0.8399	1.0452	0.9653	0.7811
4805	0.06	5.27	36.6	sp|O75122|CLAP2_HUMAN	CLIP-associating protein 2 OS=Homo sapiens GN=CLASP2 PE=1 SV=2	HUMAN	3	0.8406	0.7904	0.6762	0.7825
1418	9.4	10.27	39.3	sp|O95793|STAU1_HUMAN	Double-stranded RNA-binding protein Staufen homolog 1 OS=Homo sapiens GN=STAU1 PE=1 SV=2	HUMAN	4	0.841	1.0185	0.8187	0.783
3427	2.01	2.09	32.3	sp|Q8TCT8|SPP2A_HUMAN	Signal peptide peptidase-like 2A OS=Homo sapiens GN=SPPL2A PE=1 SV=2	HUMAN	2	0.8412	0.6096	0.7839	0.7838
1367	9.89	9.92	52	sp|Q9BRA2|TXD17_HUMAN	Thioredoxin domain-containing protein 17 OS=Homo sapiens GN=TXNDC17 PE=1 SV=1	HUMAN	9	0.8415	0.8188	0.979	0.7841
2570	4.01	4.02	36.5	sp|Q9BRJ7|SDOS_HUMAN	Protein syndesmos OS=Homo sapiens GN=NUDT16L1 PE=1 SV=1	HUMAN	2	0.8417	1.1486	0.8805	0.7847
3176	2.11	2.14	34	sp|Q96EB1|ELP4_HUMAN	Elongator complex protein 4 OS=Homo sapiens GN=ELP4 PE=1 SV=2	HUMAN	1	0.8418	1.1617	0.9356	0.787
4665	0.09	0.28	28.4	sp|Q8TEA1|NSUN6_HUMAN	Putative methyltransferase NSUN6 OS=Homo sapiens GN=NSUN6 PE=1 SV=1	HUMAN	0	0.8421	0.9971	1.7555	0.7872
3808	1.74	1.77	21.3	sp|Q14534|ERG1_HUMAN	Squalene monooxygenase OS=Homo sapiens GN=SQLE PE=2 SV=3	HUMAN	1	0.8421	0.6995	0.9582	0.7876
2979	2.56	2.58	34.3	sp|P62310|LSM3_HUMAN	U6 snRNA-associated Sm-like protein LSm3 OS=Homo sapiens GN=LSM3 PE=1 SV=2	HUMAN	2	0.8442	0.7865	1.2996	0.7877
4979	0.05	0.1	25	sp|P40123|CAP2_HUMAN	Adenylyl cyclase-associated protein 2 OS=Homo sapiens GN=CAP2 PE=1 SV=1	HUMAN	0	0.8443	1.0524	0.9121	0.7879
3688	2	2.02	11.3	sp|P38571|LICH_HUMAN	Lysosomal acid lipase/cholesteryl ester hydrolase OS=Homo sapiens GN=LIPA PE=1 SV=2	HUMAN	1	0.8449	1.0222	0.8965	0.7881
1506	8.65	18.77	37.7	sp|O94973|AP2A2_HUMAN	AP-2 complex subunit alpha-2 OS=Homo sapiens GN=AP2A2 PE=1 SV=2	HUMAN	10	0.8469	0.8346	0.9237	0.7885
4496	0.14	0.4	25.4	sp|P50748|KNTC1_HUMAN	Kinetochore-associated protein 1 OS=Homo sapiens GN=KNTC1 PE=1 SV=1	HUMAN	2	0.8473	1.1934	0.513	0.7888
3663	2	2.03	24.3	sp|Q8N5C7|DTWD1_HUMAN	DTW domain-containing protein 1 OS=Homo sapiens GN=DTWD1 PE=2 SV=1	HUMAN	1	0.8474	0.5077	0.7999	0.7889
3371	2.01	2.42	27.9	sp|P30307|MPIP3_HUMAN	M-phase inducer phosphatase 3 OS=Homo sapiens GN=CDC25C PE=1 SV=2	HUMAN	1	0.8474	0.9863	0.9383	0.7896
2859	3.06	3.61	32.7	sp|Q9H5Z1|DHX35_HUMAN	Probable ATP-dependent RNA helicase DHX35 OS=Homo sapiens GN=DHX35 PE=1 SV=2	HUMAN	2	0.8475	0.7434	1.1156	0.7897
1717	7.47	7.78	35.9	sp|Q9NWZ3|IRAK4_HUMAN	Interleukin-1 receptor-associated kinase 4 OS=Homo sapiens GN=IRAK4 PE=1 SV=1	HUMAN	4	0.8476	1.0447	0.7589	0.79
2969	2.59	2.59	62.1	sp|Q9H910|HN1L_HUMAN	Hematological and neurological expressed 1-like protein OS=Homo sapiens GN=HN1L PE=1 SV=1	HUMAN	3	0.8477	0.9619	0.7985	0.7906
3187	2.09	3.92	27.9	sp|P07199|CENPB_HUMAN	Major centromere autoantigen B OS=Homo sapiens GN=CENPB PE=1 SV=2	HUMAN	2	0.848	0.8651	1.0535	0.7909
1550	8.34	8.86	37.1	sp|P35221|CTNA1_HUMAN	Catenin alpha-1 OS=Homo sapiens GN=CTNNA1 PE=1 SV=1	HUMAN	5	0.8488	0.869	0.8031	0.791
4204	0.45	2.66	26.4	sp|Q9ULC5|ACSL5_HUMAN	Long-chain-fatty-acid--CoA ligase 5 OS=Homo sapiens GN=ACSL5 PE=1 SV=1	HUMAN	2	0.8496	1.3247	1.1558	0.7915
2626	4	4.04	39.2	sp|P17275|JUNB_HUMAN	Transcription factor jun-B OS=Homo sapiens GN=JUNB PE=1 SV=1	HUMAN	2	0.8508	0.7767	0.7389	0.792
2066	5.98	6.03	69.5	sp|Q9Y5L4|TIM13_HUMAN	Mitochondrial import inner membrane translocase subunit Tim13 OS=Homo sapiens GN=TIMM13 PE=1 SV=1	HUMAN	4	0.8509	0.7962	0.8527	0.7929
2475	4.05	4.85	32.2	sp|Q9NQC3|RTN4_HUMAN	Reticulon-4 OS=Homo sapiens GN=RTN4 PE=1 SV=2	HUMAN	5	0.8513	0.8203	0.8987	0.7929
1900	6.28	6.5	51.9	sp|P31749|AKT1_HUMAN	RAC-alpha serine/threonine-protein kinase OS=Homo sapiens GN=AKT1 PE=1 SV=2	HUMAN	3	0.8517	1.0608	0.817	0.7934
3607	2	2.08	32.6	sp|Q9Y305|ACOT9_HUMAN	Acyl-coenzyme A thioesterase 9, mitochondrial OS=Homo sapiens GN=ACOT9 PE=1 SV=2	HUMAN	1	0.8519	0.9677	0.5029	0.7935
3142	2.16	2.47	19.2	sp|Q27J81|INF2_HUMAN	Inverted formin-2 OS=Homo sapiens GN=INF2 PE=1 SV=2	HUMAN	2	0.8521	0.6168	0.8856	0.794
1427	9.33	9.88	54.7	sp|Q9Y5K8|VATD_HUMAN	V-type proton ATPase subunit D OS=Homo sapiens GN=ATP6V1D PE=1 SV=1	HUMAN	5	0.8524	0.8538	0.8415	0.7946
3817	1.71	1.73	37	sp|Q9BZL1|UBL5_HUMAN	Ubiquitin-like protein 5 OS=Homo sapiens GN=UBL5 PE=1 SV=1	HUMAN	3	0.8527	1.0696	0.6061	0.7954
2257	4.9	5.27	35.4	sp|Q13137|CACO2_HUMAN	Calcium-binding and coiled-coil domain-containing protein 2 OS=Homo sapiens GN=CALCOCO2 PE=1 SV=1	HUMAN	4	0.8527	0.942	0.7196	0.7958
3199	2.08	2.26	35.6	sp|Q6PCB5|RSBNL_HUMAN	Round spermatid basic protein 1-like protein OS=Homo sapiens GN=RSBN1L PE=1 SV=2	HUMAN	2	0.8529	0.8847	0.7169	0.796
4059	0.81	0.97	8.6	sp|Q9Y259|CHKB_HUMAN	Choline/ethanolamine kinase OS=Homo sapiens GN=CHKB PE=1 SV=3	HUMAN	1	0.854	1.0681	0.8113	0.7964
2689	3.82	4.46	27.7	sp|Q9NVC6|MED17_HUMAN	Mediator of RNA polymerase II transcription subunit 17 OS=Homo sapiens GN=MED17 PE=1 SV=2	HUMAN	2	0.8541	0.9238	0.93	0.7966
1567	8.24	14.57	50.6	sp|Q92769|HDAC2_HUMAN	Histone deacetylase 2 OS=Homo sapiens GN=HDAC2 PE=1 SV=2	HUMAN	15	0.8545	0.9444	1.1269	0.7967
3333	2.02	2.05	26.5	sp|Q96EB6|SIR1_HUMAN	NAD-dependent protein deacetylase sirtuin-1 OS=Homo sapiens GN=SIRT1 PE=1 SV=2	HUMAN	2	0.8546	0.9274	1.2043	0.7967
2686	3.85	3.88	36.9	sp|Q9Y4H4|GPSM3_HUMAN	G-protein-signaling modulator 3 OS=Homo sapiens GN=GPSM3 PE=1 SV=1	HUMAN	2	0.8546	1.3989	0.672	0.797
2830	3.16	3.5	36.7	sp|Q9NRZ7|PLCC_HUMAN	1-acyl-sn-glycerol-3-phosphate acyltransferase gamma OS=Homo sapiens GN=AGPAT3 PE=1 SV=1	HUMAN	2	0.8548	1.5196	0.9299	0.797
2096	5.8	6.27	18.2	sp|P43307|SSRA_HUMAN	Translocon-associated protein subunit alpha OS=Homo sapiens GN=SSR1 PE=1 SV=3	HUMAN	3	0.8549	0.8722	0.8446	0.7971
3986	1.03	1.6	26.9	sp|P49815|TSC2_HUMAN	Tuberin OS=Homo sapiens GN=TSC2 PE=1 SV=2	HUMAN	3	0.8556	1.1198	1.2873	0.7974
2269	4.84	4.84	37.1	sp|O95169|NDUB8_HUMAN	NADH dehydrogenase [ubiquinone] 1 beta subcomplex subunit 8, mitochondrial OS=Homo sapiens GN=NDUFB8 PE=1 SV=1	HUMAN	3	0.8558	0.7559	0.9036	0.7983
1868	6.45	6.52	49.5	sp|Q9Y2T2|AP3M1_HUMAN	AP-3 complex subunit mu-1 OS=Homo sapiens GN=AP3M1 PE=1 SV=1	HUMAN	3	0.856	1.005	0.9045	0.7986
2622	4	4.05	53.3	sp|Q9H4G4|GAPR1_HUMAN	Golgi-associated plant pathogenesis-related protein 1 OS=Homo sapiens GN=GLIPR2 PE=1 SV=3	HUMAN	2	0.8563	1.0324	1.0299	0.7987
2338	4.47	5.67	40.6	sp|Q9BUI4|RPC3_HUMAN	DNA-directed RNA polymerase III subunit RPC3 OS=Homo sapiens GN=POLR3C PE=1 SV=1	HUMAN	4	0.8564	0.8406	1.0128	0.7988
2700	3.77	3.85	22.3	sp|Q99805|TM9S2_HUMAN	Transmembrane 9 superfamily member 2 OS=Homo sapiens GN=TM9SF2 PE=1 SV=1	HUMAN	4	0.857	1.2306	0.9511	0.8
3115	2.2	2.23	13.3	sp|P35475|IDUA_HUMAN	Alpha-L-iduronidase OS=Homo sapiens GN=IDUA PE=1 SV=2	HUMAN	1	0.8585	1.0471	0.7312	0.8001
2345	4.45	4.54	45.1	sp|Q9NV31|IMP3_HUMAN	U3 small nucleolar ribonucleoprotein protein IMP3 OS=Homo sapiens GN=IMP3 PE=1 SV=1	HUMAN	4	0.8587	0.8045	1.0131	0.8004
1605	8.04	9.29	46.9	sp|Q8WX92|NELFB_HUMAN	Negative elongation factor B OS=Homo sapiens GN=COBRA1 PE=1 SV=1	HUMAN	4	0.8599	0.917	0.9626	0.8015
3787	1.83	2.35	29.5	sp|P23458|JAK1_HUMAN	Tyrosine-protein kinase JAK1 OS=Homo sapiens GN=JAK1 PE=1 SV=2	HUMAN	2	0.8601	0.7017	1.1106	0.8029
2542	4.01	4.43	35.9	sp|Q9NQ55|SSF1_HUMAN	Suppressor of SWI4 1 homolog OS=Homo sapiens GN=PPAN PE=1 SV=1	HUMAN	2	0.8601	1.1338	0.7201	0.803
4017	0.93	6.78	38.3	sp|Q6N069|NAA16_HUMAN	N-alpha-acetyltransferase 16, NatA auxiliary subunit OS=Homo sapiens GN=NAA16 PE=1 SV=2	HUMAN	4	0.8601	0.9261	0.8289	0.8031
3104	2.21	4.55	42.4	sp|Q9H9S4|CB39L_HUMAN	Calcium-binding protein 39-like OS=Homo sapiens GN=CAB39L PE=1 SV=3	HUMAN	2	0.8602	0.8943	0.8201	0.8032
2989	2.53	2.53	23.7	sp|P30536|TSPOA_HUMAN	Translocator protein OS=Homo sapiens GN=TSPO PE=1 SV=3	HUMAN	2	0.8602	0.8689	1.0335	0.8038
3811	1.73	1.76	27.3	sp|O14757|CHK1_HUMAN	Serine/threonine-protein kinase Chk1 OS=Homo sapiens GN=CHEK1 PE=1 SV=2	HUMAN	1	0.8606	6.9447	0.7396	0.8049
3121	2.19	2.5	28	sp|O75164|KDM4A_HUMAN	Lysine-specific demethylase 4A OS=Homo sapiens GN=KDM4A PE=1 SV=2	HUMAN	1	0.8614	0.8914	0.7021	0.805
2254	4.92	5.21	35.5	sp|P52756|RBM5_HUMAN	RNA-binding protein 5 OS=Homo sapiens GN=RBM5 PE=1 SV=2	HUMAN	3	0.8617	0.8326	1.0838	0.8052
2001	6.03	6.17	32.7	sp|Q9BQC3|DPH2_HUMAN	Diphthamide biosynthesis protein 2 OS=Homo sapiens GN=DPH2 PE=1 SV=1	HUMAN	3	0.8619	0.9848	1.3015	0.8063
1910	6.24	6.83	26.8	sp|Q9H270|VPS11_HUMAN	Vacuolar protein sorting-associated protein 11 homolog OS=Homo sapiens GN=VPS11 PE=1 SV=1	HUMAN	4	0.8621	0.8448	1.0436	0.8068
2716	3.69	3.72	21.3	sp|Q92560|BAP1_HUMAN	Ubiquitin carboxyl-terminal hydrolase BAP1 OS=Homo sapiens GN=BAP1 PE=1 SV=2	HUMAN	2	0.8621	0.7431	1.3724	0.8072
3300	2.02	2.73	34.3	sp|P48736|PK3CG_HUMAN	Phosphatidylinositol 4,5-bisphosphate 3-kinase catalytic subunit gamma isoform OS=Homo sapiens GN=PIK3CG PE=1 SV=3	HUMAN	2	0.8622	0.4565	1.5068	0.8073
4494	0.14	1.74	35.8	sp|Q9NVR2|INT10_HUMAN	Integrator complex subunit 10 OS=Homo sapiens GN=INTS10 PE=1 SV=2	HUMAN	2	0.8626	1.0521	0.8962	0.8074
3489	2	2.49	33.9	sp|Q9UL63|MKLN1_HUMAN	Muskelin OS=Homo sapiens GN=MKLN1 PE=1 SV=2	HUMAN	1	0.8627	1.1109	0.8883	0.8075
2997	2.49	3.55	26.3	sp|Q92538|GBF1_HUMAN	Golgi-specific brefeldin A-resistance guanine nucleotide exchange factor 1 OS=Homo sapiens GN=GBF1 PE=1 SV=2	HUMAN	5	0.8629	0.9376	0.7913	0.8079
1115	12.18	12.24	38.5	sp|P52294|IMA1_HUMAN	Importin subunit alpha-1 OS=Homo sapiens GN=KPNA1 PE=1 SV=3	HUMAN	9	0.8632	0.9875	0.6712	0.808
3326	2.02	2.08	21.2	sp|Q9Y4E5|ZN451_HUMAN	Zinc finger protein 451 OS=Homo sapiens GN=ZNF451 PE=2 SV=2	HUMAN	1	0.8636	0.7787	0.8782	0.808
3377	2.01	2.36	35.2	sp|O60645|EXOC3_HUMAN	Exocyst complex component 3 OS=Homo sapiens GN=EXOC3 PE=1 SV=2	HUMAN	1	0.8641	0.6584	1.5945	0.8083
2012	6.02	6.25	44.3	sp|Q92890|UFD1_HUMAN	Ubiquitin fusion degradation protein 1 homolog OS=Homo sapiens GN=UFD1L PE=1 SV=3	HUMAN	8	0.8648	0.9021	0.9025	0.8084
3866	1.51	2.68	32.5	sp|Q5T1C6|THEM4_HUMAN	Acyl-coenzyme A thioesterase THEM4 OS=Homo sapiens GN=THEM4 PE=1 SV=1	HUMAN	2	0.865	1.7463	1.0555	0.8089
698	18.08	19.2	41.1	sp|P08631|HCK_HUMAN	Tyrosine-protein kinase HCK OS=Homo sapiens GN=HCK PE=1 SV=5	HUMAN	16	0.8651	0.8476	0.8944	0.8094
2853	3.08	5.64	28.3	sp|Q9NYV4|CDK12_HUMAN	Cyclin-dependent kinase 12 OS=Homo sapiens GN=CDK12 PE=1 SV=2	HUMAN	4	0.8655	1.0194	0.9823	0.8095
1417	9.4	12.2	39.1	sp|P06400|RB_HUMAN	Retinoblastoma-associated protein OS=Homo sapiens GN=RB1 PE=1 SV=2	HUMAN	6	0.8658	0.9763	0.6415	0.8097
4285	0.32	0.48	24.5	RRRRRsp|Q96RL7|VP13A_HUMAN	REVERSED Vacuolar protein sorting-associated protein 13A OS=Homo sapiens GN=VPS13A PE=1 SV=2	HUMAN	2	0.866	1.3783	1.5418	0.8099
4363	0.23	0.44	18.1	sp|Q8WUA4|TF3C2_HUMAN	General transcription factor 3C polypeptide 2 OS=Homo sapiens GN=GTF3C2 PE=1 SV=2	HUMAN	0	0.8666	0.6898	1.53	0.8105
4547	0.12	0.43	23.3	sp|O60603|TLR2_HUMAN	Toll-like receptor 2 OS=Homo sapiens GN=TLR2 PE=1 SV=1	HUMAN	0	0.8667	0.8234	0.9251	0.8106
3846	1.62	1.64	16.4	sp|Q9NSY0|NRBP2_HUMAN	Nuclear receptor-binding protein 2 OS=Homo sapiens GN=NRBP2 PE=1 SV=2	HUMAN	1	0.8673	0.4053	3.1015	0.8107
1592	8.11	8.35	29	sp|O96028|NSD2_HUMAN	Histone-lysine N-methyltransferase NSD2 OS=Homo sapiens GN=WHSC1 PE=1 SV=1	HUMAN	5	0.8676	0.7388	1.0884	0.8113
1798	6.91	7.03	36.5	sp|P42768|WASP_HUMAN	Wiskott-Aldrich syndrome protein OS=Homo sapiens GN=WAS PE=1 SV=4	HUMAN	4	0.868	0.7979	0.9473	0.8117
1144	12	12.25	56.7	sp|P19105|ML12A_HUMAN	Myosin regulatory light chain 12A OS=Homo sapiens GN=MYL12A PE=1 SV=2	HUMAN	13	0.8682	0.8662	0.9382	0.8117
3310	2.02	2.28	34.5	sp|Q8NF37|PCAT1_HUMAN	Lysophosphatidylcholine acyltransferase 1 OS=Homo sapiens GN=LPCAT1 PE=1 SV=2	HUMAN	1	0.8689	0.5769	1.8089	0.8117
3840	1.63	1.81	35.5	sp|P29597|TYK2_HUMAN	Non-receptor tyrosine-protein kinase TYK2 OS=Homo sapiens GN=TYK2 PE=1 SV=3	HUMAN	1	0.8692	1.0627	0.9366	0.8118
3653	2	2.03	16.6	sp|A7E2V4|K0913_HUMAN	Zinc finger SWIM domain-containing protein KIAA0913 OS=Homo sapiens GN=KIAA0913 PE=1 SV=1	HUMAN	1	0.8696	1.3422	0.8505	0.8118
2498	4.04	4.15	41.9	sp|P01730|CD4_HUMAN	T-cell surface glycoprotein CD4 OS=Homo sapiens GN=CD4 PE=1 SV=1	HUMAN	2	0.8699	0.9369	0.8837	0.8119
2809	3.28	3.41	23.6	sp|Q9H4I2|ZHX3_HUMAN	Zinc fingers and homeoboxes protein 3 OS=Homo sapiens GN=ZHX3 PE=1 SV=3	HUMAN	2	0.8699	0.7175	0.9397	0.8121
2909	2.85	3.03	30.8	sp|Q9NUW8|TYDP1_HUMAN	Tyrosyl-DNA phosphodiesterase 1 OS=Homo sapiens GN=TDP1 PE=1 SV=2	HUMAN	3	0.8701	1.6736	0.8245	0.8124
3467	2	10.07	54.6	sp|Q8WUD1|RAB2B_HUMAN	Ras-related protein Rab-2B OS=Homo sapiens GN=RAB2B PE=1 SV=1	HUMAN	6	0.8705	0.7517	1.1563	0.8129
3280	2.03	2.21	32.5	sp|Q9NX74|DUS2L_HUMAN	tRNA-dihydrouridine(20) synthase [NAD(P)+]-like OS=Homo sapiens GN=DUS2L PE=1 SV=1	HUMAN	1	0.8706	1.0031	0.4054	0.813
2642	4	4.03	49.1	sp|O14548|COX7R_HUMAN	Cytochrome c oxidase subunit 7A-related protein, mitochondrial OS=Homo sapiens GN=COX7A2L PE=1 SV=2	HUMAN	2	0.8707	1.2766	0.598	0.813
3128	2.18	2.36	29.3	sp|Q92609|TBCD5_HUMAN	TBC1 domain family member 5 OS=Homo sapiens GN=TBC1D5 PE=1 SV=1	HUMAN	1	0.8707	0.9196	0.7282	0.8131
2350	4.42	4.81	17.4	sp|P42695|CNDD3_HUMAN	Condensin-2 complex subunit D3 OS=Homo sapiens GN=NCAPD3 PE=1 SV=2	HUMAN	3	0.8708	0.7032	1.4215	0.8132
3620	2	2.07	28.4	sp|Q8WUY1|THEM6_HUMAN	UPF0670 protein THEM6 OS=Homo sapiens GN=THEM6 PE=1 SV=2	HUMAN	3	0.8711	1.4906	0.8787	0.8133
2878	3	3.37	21.6	sp|Q9Y2E5|MA2B2_HUMAN	Epididymis-specific alpha-mannosidase OS=Homo sapiens GN=MAN2B2 PE=1 SV=4	HUMAN	2	0.8719	0.8229	0.6923	0.8134
2486	4.04	9.2	44.9	sp|P08754|GNAI3_HUMAN	Guanine nucleotide-binding protein G(k) subunit alpha OS=Homo sapiens GN=GNAI3 PE=1 SV=3	HUMAN	10	0.872	0.8662	0.8649	0.814
4119	0.65	0.86	16.4	sp|Q6ZU65|UBN2_HUMAN	Ubinuclein-2 OS=Homo sapiens GN=UBN2 PE=1 SV=2	HUMAN	1	0.8722	0.5272	1.0355	0.8141
2222	5.08	5.83	40.7	sp|Q8N6H7|ARFG2_HUMAN	ADP-ribosylation factor GTPase-activating protein 2 OS=Homo sapiens GN=ARFGAP2 PE=1 SV=1	HUMAN	3	0.8723	0.8541	1.1114	0.8144
3395	2.01	2.25	25.8	sp|P49641|MA2A2_HUMAN	Alpha-mannosidase 2x OS=Homo sapiens GN=MAN2A2 PE=2 SV=3	HUMAN	1	0.8725	0.8435	1.2487	0.8152
2770	3.45	3.77	29.5	sp|Q9BUB5|MKNK1_HUMAN	MAP kinase-interacting serine/threonine-protein kinase 1 OS=Homo sapiens GN=MKNK1 PE=1 SV=1	HUMAN	3	0.8725	0.7101	1.0533	0.8153
2289	4.75	4.87	28.8	sp|Q9NRL3|STRN4_HUMAN	Striatin-4 OS=Homo sapiens GN=STRN4 PE=1 SV=2	HUMAN	3	0.8727	1.7619	0.9414	0.8155
4582	0.11	0.54	21.2	sp|Q8TEQ0|SNX29_HUMAN	Sorting nexin-29 OS=Homo sapiens GN=SNX29 PE=1 SV=3	HUMAN	0	0.8728	0.7678	0.9143	0.8163
4239	0.39	0.55	13.7	sp|Q86V21|AACS_HUMAN	Acetoacetyl-CoA synthetase OS=Homo sapiens GN=AACS PE=1 SV=1	HUMAN	1	0.8728	0.8226	0.6992	0.8166
2932	2.75	3.05	22.3	sp|Q13042|CDC16_HUMAN	Cell division cycle protein 16 homolog OS=Homo sapiens GN=CDC16 PE=1 SV=2	HUMAN	2	0.8728	0.8304	0.8174	0.8169
1708	7.53	8.66	32.6	sp|P51648|AL3A2_HUMAN	Fatty aldehyde dehydrogenase OS=Homo sapiens GN=ALDH3A2 PE=1 SV=1	HUMAN	4	0.8728	0.922	0.9254	0.8173
1686	7.66	8.08	57.9	sp|P25789|PSA4_HUMAN	Proteasome subunit alpha type-4 OS=Homo sapiens GN=PSMA4 PE=1 SV=1	HUMAN	4	0.873	0.8388	1.0384	0.8173
1883	6.37	6.78	29.1	sp|A3KN83|SBNO1_HUMAN	Protein strawberry notch homolog 1 OS=Homo sapiens GN=SBNO1 PE=1 SV=1	HUMAN	4	0.8731	0.912	1.0076	0.8184
2070	5.96	6.07	41.7	sp|Q15007|FL2D_HUMAN	Pre-mRNA-splicing regulator WTAP OS=Homo sapiens GN=WTAP PE=1 SV=2	HUMAN	5	0.8742	0.8708	0.9334	0.8187
3749	2	2	39.1	sp|O15235|RT12_HUMAN	28S ribosomal protein S12, mitochondrial OS=Homo sapiens GN=MRPS12 PE=1 SV=1	HUMAN	1	0.8742	0.8006	1.1098	0.8187
67	67.44	68.37	69.7	sp|P11940|PABP1_HUMAN	Polyadenylate-binding protein 1 OS=Homo sapiens GN=PABPC1 PE=1 SV=2	HUMAN	63	0.8743	0.8613	0.8505	0.8188
3136	2.17	2.35	39.2	sp|P04424|ARLY_HUMAN	Argininosuccinate lyase OS=Homo sapiens GN=ASL PE=1 SV=4	HUMAN	1	0.8744	0.9435	1.1288	0.819
4163	0.53	0.85	40.3	RRRRRsp|Q8IUD2|RB6I2_HUMAN	REVERSED ELKS/Rab6-interacting/CAST family member 1 OS=Homo sapiens GN=ERC1 PE=1 SV=1	HUMAN	1	0.8747	0.7221	1.0487	0.8191
2124	5.62	5.62	43.3	sp|Q8NFH4|NUP37_HUMAN	Nucleoporin Nup37 OS=Homo sapiens GN=NUP37 PE=1 SV=1	HUMAN	4	0.8761	0.9723	0.9748	0.8195
2728	3.63	3.72	35	sp|Q9H6H4|REEP4_HUMAN	Receptor expression-enhancing protein 4 OS=Homo sapiens GN=REEP4 PE=1 SV=1	HUMAN	4	0.8762	0.96	0.8012	0.8197
4058	0.82	0.82	32.4	sp|P62877|RBX1_HUMAN	E3 ubiquitin-protein ligase RBX1 OS=Homo sapiens GN=RBX1 PE=1 SV=1	HUMAN	1	0.8763	1.0926	0.814	0.8203
3259	2.04	2.05	34.6	sp|Q9NZ63|CI078_HUMAN	Uncharacterized protein C9orf78 OS=Homo sapiens GN=C9orf78 PE=1 SV=1	HUMAN	1	0.877	0.738	0.9444	0.8207
2233	5.03	6.15	34.7	sp|O75027|ABCB7_HUMAN	ATP-binding cassette sub-family B member 7, mitochondrial OS=Homo sapiens GN=ABCB7 PE=1 SV=2	HUMAN	3	0.8772	0.9971	1.0173	0.8217
3572	2	2.16	15	sp|P58557|YBEY_HUMAN	rRNA maturation factor homolog OS=Homo sapiens GN=YBEY PE=2 SV=2	HUMAN	1	0.8772	1.0301	1.3356	0.8224
1612	8.02	9.31	71.1	sp|Q8NBT2|SPC24_HUMAN	Kinetochore protein Spc24 OS=Homo sapiens GN=SPC24 PE=1 SV=2	HUMAN	7	0.8776	1.0051	1.2057	0.8227
2277	4.79	5.1	26.6	sp|O00221|IKBE_HUMAN	NF-kappa-B inhibitor epsilon OS=Homo sapiens GN=NFKBIE PE=1 SV=3	HUMAN	3	0.8777	0.9796	1.3293	0.8228
710	17.91	18.16	60.4	sp|Q7L1Q6|BZW1_HUMAN	Basic leucine zipper and W2 domain-containing protein 1 OS=Homo sapiens GN=BZW1 PE=1 SV=1	HUMAN	9	0.878	0.876	0.9058	0.8232
1670	7.78	8.44	73.8	sp|Q14011|CIRBP_HUMAN	Cold-inducible RNA-binding protein OS=Homo sapiens GN=CIRBP PE=1 SV=1	HUMAN	6	0.878	0.9307	0.9673	0.8232
3390	2.01	2.29	52.9	sp|Q86VN1|VPS36_HUMAN	Vacuolar protein-sorting-associated protein 36 OS=Homo sapiens GN=VPS36 PE=1 SV=1	HUMAN	1	0.8782	0.7859	0.8103	0.8243
3262	2.03	5.44	31.1	sp|Q8NB90|SPAT5_HUMAN	Spermatogenesis-associated protein 5 OS=Homo sapiens GN=SPATA5 PE=1 SV=3	HUMAN	2	0.8783	0.7976	0.8802	0.8251
2559	4.01	4.12	37.8	sp|Q96GS4|CQ059_HUMAN	Uncharacterized protein C17orf59 OS=Homo sapiens GN=C17orf59 PE=1 SV=2	HUMAN	2	0.8784	1.6286	0.8385	0.8251
1880	6.39	10.61	33	sp|O60684|IMA7_HUMAN	Importin subunit alpha-7 OS=Homo sapiens GN=KPNA6 PE=1 SV=1	HUMAN	9	0.8788	0.9625	0.8541	0.8255
550	21.09	21.13	68.5	sp|P84077|ARF1_HUMAN	ADP-ribosylation factor 1 OS=Homo sapiens GN=ARF1 PE=1 SV=2	HUMAN	19	0.8792	0.9714	0.7485	0.8257
3103	2.22	2.25	28.6	sp|P78324|SHPS1_HUMAN	Tyrosine-protein phosphatase non-receptor type substrate 1 OS=Homo sapiens GN=SIRPA PE=1 SV=2	HUMAN	2	0.8792	0.7835	0.5968	0.8258
3601	2	2.09	13.2	sp|Q96QD8|S38A2_HUMAN	Sodium-coupled neutral amino acid transporter 2 OS=Homo sapiens GN=SLC38A2 PE=1 SV=2	HUMAN	1	0.88	0.5951	1.1401	0.8259
1001	13.55	13.66	48.8	sp|Q9NR12|PDLI7_HUMAN	PDZ and LIM domain protein 7 OS=Homo sapiens GN=PDLIM7 PE=1 SV=1	HUMAN	7	0.8809	0.7861	1.0298	0.8268
2951	2.66	4.5	51.2	sp|O75330|HMMR_HUMAN	Hyaluronan mediated motility receptor OS=Homo sapiens GN=HMMR PE=1 SV=2	HUMAN	2	0.881	0.6958	1.1836	0.8271
2681	3.85	6.07	56.6	sp|Q9NWU2|GID8_HUMAN	Glucose-induced degradation protein 8 homolog OS=Homo sapiens GN=GID8 PE=1 SV=1	HUMAN	3	0.8813	1.5048	0.7959	0.8272
3191	2.09	2.3	31	sp|A6NC98|CC88B_HUMAN	Coiled-coil domain-containing protein 88B OS=Homo sapiens GN=CCDC88B PE=1 SV=1	HUMAN	1	0.8813	1.2256	0.8748	0.8273
2555	4.01	4.15	15.8	sp|Q9BXP2|S12A9_HUMAN	Solute carrier family 12 member 9 OS=Homo sapiens GN=SLC12A9 PE=1 SV=1	HUMAN	2	0.8821	0.9602	0.8527	0.8277
2765	3.49	3.56	28.2	sp|Q6FI81|CPIN1_HUMAN	Anamorsin OS=Homo sapiens GN=CIAPIN1 PE=1 SV=2	HUMAN	2	0.8827	0.8562	0.7945	0.8278
3460	2.01	2.01	58.3	sp|Q9Y5J6|TIM9B_HUMAN	Mitochondrial import inner membrane translocase subunit Tim9 B OS=Homo sapiens GN=FXC1 PE=1 SV=1	HUMAN	2	0.8832	0.6359	1.24	0.8278
857	15.39	17.52	47.7	sp|Q6ZSZ5|ARHGI_HUMAN	Rho guanine nucleotide exchange factor 18 OS=Homo sapiens GN=ARHGEF18 PE=1 SV=3	HUMAN	11	0.8835	1.0464	0.8738	0.828
3537	2	2.24	22.4	sp|Q4KMQ2|ANO6_HUMAN	Anoctamin-6 OS=Homo sapiens GN=ANO6 PE=1 SV=2	HUMAN	2	0.8839	1.0782	1.337	0.8283
592	20.22	21.16	39.9	sp|Q14444|CAPR1_HUMAN	Caprin-1 OS=Homo sapiens GN=CAPRIN1 PE=1 SV=2	HUMAN	21	0.8841	0.8285	0.7462	0.8286
2547	4.01	4.3	40.2	sp|P09001|RM03_HUMAN	39S ribosomal protein L3, mitochondrial OS=Homo sapiens GN=MRPL3 PE=1 SV=1	HUMAN	2	0.8846	0.8585	1.0382	0.8291
3020	2.44	2.83	35.4	sp|Q8N392|RHG18_HUMAN	Rho GTPase-activating protein 18 OS=Homo sapiens GN=ARHGAP18 PE=1 SV=3	HUMAN	2	0.8851	1.1167	0.8441	0.8294
3679	2	2.02	31.9	sp|Q68D91|MBLC2_HUMAN	Metallo-beta-lactamase domain-containing protein 2 OS=Homo sapiens GN=MBLAC2 PE=1 SV=3	HUMAN	1	0.8852	1.0002	1.1227	0.8297
3173	2.11	2.48	21.4	sp|Q6PFW1|VIP1_HUMAN	Inositol hexakisphosphate and diphosphoinositol-pentakisphosphate kinase 1 OS=Homo sapiens GN=PPIP5K1 PE=1 SV=1	HUMAN	2	0.8859	0.9416	0.878	0.8303
1103	12.32	13.87	42.4	sp|P21399|ACOC_HUMAN	Cytoplasmic aconitate hydratase OS=Homo sapiens GN=ACO1 PE=1 SV=3	HUMAN	9	0.8861	0.9248	0.9673	0.8319
3957	1.14	1.4	29.4	sp|Q2TAK8|MUM1_HUMAN	PWWP domain-containing protein MUM1 OS=Homo sapiens GN=MUM1 PE=1 SV=3	HUMAN	1	0.8862	0.5539	0.9592	0.832
1704	7.56	8.84	31.3	sp|Q9Y4C8|RBM19_HUMAN	Probable RNA-binding protein 19 OS=Homo sapiens GN=RBM19 PE=1 SV=3	HUMAN	9	0.8866	1.0032	0.9106	0.8323
2406	4.2	4.22	50.5	sp|C9JLW8|F195B_HUMAN	Protein FAM195B OS=Homo sapiens GN=FAM195B PE=3 SV=1	HUMAN	3	0.8867	0.8585	0.8868	0.8325
4191	0.48	0.68	11.9	sp|Q8NEC7|GSTCD_HUMAN	Glutathione S-transferase C-terminal domain-containing protein OS=Homo sapiens GN=GSTCD PE=1 SV=2	HUMAN	1	0.8867	0.5892	0.4044	0.8327
3624	2	2.06	21.8	sp|Q9UJX2|CDC23_HUMAN	Cell division cycle protein 23 homolog OS=Homo sapiens GN=CDC23 PE=1 SV=3	HUMAN	1	0.8868	1.0632	1.0113	0.8328
31	88.58	89.75	74.6	sp|Q92598|HS105_HUMAN	Heat shock protein 105 kDa OS=Homo sapiens GN=HSPH1 PE=1 SV=1	HUMAN	68	0.887	0.9019	0.8287	0.833
1452	9.09	10.83	32.8	sp|Q13617|CUL2_HUMAN	Cullin-2 OS=Homo sapiens GN=CUL2 PE=1 SV=2	HUMAN	7	0.8874	0.9983	0.8227	0.8335
3243	2.04	6.59	52.6	sp|Q9NQ29|LUC7L_HUMAN	Putative RNA-binding protein Luc7-like 1 OS=Homo sapiens GN=LUC7L PE=1 SV=1	HUMAN	4	0.8876	1.1256	1.0831	0.8335
218	39.01	53.3	69.5	sp|P17844|DDX5_HUMAN	Probable ATP-dependent RNA helicase DDX5 OS=Homo sapiens GN=DDX5 PE=1 SV=1	HUMAN	47	0.8877	0.9006	0.8532	0.8336
3190	2.09	2.34	35.5	sp|Q96TC7|RMD3_HUMAN	Regulator of microtubule dynamics protein 3 OS=Homo sapiens GN=FAM82A2 PE=1 SV=2	HUMAN	2	0.8878	1.2251	0.7362	0.8341
1921	6.2	6.29	29.6	sp|Q12849|GRSF1_HUMAN	G-rich sequence factor 1 OS=Homo sapiens GN=GRSF1 PE=1 SV=3	HUMAN	5	0.8881	1.0181	0.8016	0.8349
4081	0.75	1.35	34.3	sp|Q9Y6D5|BIG2_HUMAN	Brefeldin A-inhibited guanine nucleotide-exchange protein 2 OS=Homo sapiens GN=ARFGEF2 PE=1 SV=3	HUMAN	2	0.8882	0.8501	1.0826	0.8354
1989	6.04	6.57	23.7	sp|Q9UPN7|PP6R1_HUMAN	Serine/threonine-protein phosphatase 6 regulatory subunit 1 OS=Homo sapiens GN=PPP6R1 PE=1 SV=5	HUMAN	3	0.8882	1.0861	0.9355	0.8354
3094	2.25	3.72	27.9	sp|Q7Z6I6|RHG30_HUMAN	Rho GTPase-activating protein 30 OS=Homo sapiens GN=ARHGAP30 PE=1 SV=3	HUMAN	3	0.8884	1.0393	0.7338	0.836
2571	4.01	4.01	21.8	sp|Q99470|SDF2_HUMAN	Stromal cell-derived factor 2 OS=Homo sapiens GN=SDF2 PE=1 SV=2	HUMAN	2	0.8891	0.8313	1.3011	0.8364
2271	4.83	4.89	48.4	sp|Q9UK41|VPS28_HUMAN	Vacuolar protein sorting-associated protein 28 homolog OS=Homo sapiens GN=VPS28 PE=1 SV=1	HUMAN	4	0.8896	0.9438	0.7385	0.8365
3182	2.1	2.19	34.7	sp|P54619|AAKG1_HUMAN	5'-AMP-activated protein kinase subunit gamma-1 OS=Homo sapiens GN=PRKAG1 PE=1 SV=1	HUMAN	2	0.8896	0.8336	1.3595	0.8365
3133	2.17	2.53	24.9	sp|P46926|GNPI1_HUMAN	Glucosamine-6-phosphate isomerase 1 OS=Homo sapiens GN=GNPDA1 PE=1 SV=1	HUMAN	2	0.8903	1.2032	0.9052	0.837
4178	0.51	0.54	37.6	sp|Q05D32|CTSL2_HUMAN	CTD small phosphatase-like protein 2 OS=Homo sapiens GN=CTDSPL2 PE=1 SV=2	HUMAN	1	0.8907	1.3879	0.6159	0.8374
2628	4	4.04	16.8	sp|Q99685|MGLL_HUMAN	Monoglyceride lipase OS=Homo sapiens GN=MGLL PE=1 SV=2	HUMAN	2	0.8913	1.1064	0.7709	0.8375
1894	6.3	15.8	45.9	sp|Q9BQ39|DDX50_HUMAN	ATP-dependent RNA helicase DDX50 OS=Homo sapiens GN=DDX50 PE=1 SV=1	HUMAN	9	0.8913	0.7814	1.0874	0.8376
3057	2.34	3.8	21.8	sp|P10398|ARAF_HUMAN	Serine/threonine-protein kinase A-Raf OS=Homo sapiens GN=ARAF PE=1 SV=2	HUMAN	2	0.8914	1.2223	0.9992	0.8384
2839	3.13	3.39	38.2	sp|O95456|PSMG1_HUMAN	Proteasome assembly chaperone 1 OS=Homo sapiens GN=PSMG1 PE=1 SV=1	HUMAN	4	0.8918	0.9416	1.2499	0.8387
848	15.52	16.12	31.3	sp|Q8TDZ2|MICA1_HUMAN	Protein-methionine sulfoxide oxidase MICAL1 OS=Homo sapiens GN=MICAL1 PE=1 SV=2	HUMAN	10	0.8925	1.0331	0.8338	0.8388
1040	13.07	14.17	44	sp|P22033|MUTA_HUMAN	Methylmalonyl-CoA mutase, mitochondrial OS=Homo sapiens GN=MUT PE=1 SV=4	HUMAN	10	0.8925	1.0612	0.9675	0.8392
3145	2.16	2.21	27.7	sp|Q13588|GRAP_HUMAN	GRB2-related adapter protein OS=Homo sapiens GN=GRAP PE=1 SV=1	HUMAN	1	0.8925	0.8952	0.5915	0.8393
2829	3.16	3.53	38.7	sp|Q8N884|M21D1_HUMAN	Protein MB21D1 OS=Homo sapiens GN=MB21D1 PE=1 SV=2	HUMAN	2	0.8926	1.2243	0.6527	0.8398
1606	8.04	8.78	40	sp|P52306|GDS1_HUMAN	Rap1 GTPase-GDP dissociation stimulator 1 OS=Homo sapiens GN=RAP1GDS1 PE=1 SV=3	HUMAN	4	0.8926	1.0224	0.9026	0.8403
1352	10	10.22	38.2	sp|Q8WUX9|CHMP7_HUMAN	Charged multivesicular body protein 7 OS=Homo sapiens GN=CHMP7 PE=1 SV=1	HUMAN	5	0.8929	0.9906	0.8422	0.8408
3529	2	2.26	27.3	sp|Q13535|ATR_HUMAN	Serine/threonine-protein kinase ATR OS=Homo sapiens GN=ATR PE=1 SV=3	HUMAN	1	0.8939	1.2333	0.6353	0.8413
2995	2.5	2.64	32.4	sp|Q14005|IL16_HUMAN	Pro-interleukin-16 OS=Homo sapiens GN=IL16 PE=1 SV=4	HUMAN	2	0.8942	1.1082	0.7231	0.8413
2083	5.87	9.31	36.5	sp|P09884|DPOLA_HUMAN	DNA polymerase alpha catalytic subunit OS=Homo sapiens GN=POLA1 PE=1 SV=2	HUMAN	8	0.8945	0.8892	0.9364	0.8416
4410	0.19	0.54	35.5	sp|P19876|CXCL3_HUMAN	C-X-C motif chemokine 3 OS=Homo sapiens GN=CXCL3 PE=1 SV=1	HUMAN	1	0.8946	5.3941	0.4947	0.8419
424	25.13	25.62	61.4	sp|Q13283|G3BP1_HUMAN	Ras GTPase-activating protein-binding protein 1 OS=Homo sapiens GN=G3BP1 PE=1 SV=1	HUMAN	22	0.8946	0.9993	0.8356	0.8422
3755	2	2	13.8	sp|P49459|UBE2A_HUMAN	Ubiquitin-conjugating enzyme E2 A OS=Homo sapiens GN=UBE2A PE=1 SV=2	HUMAN	2	0.8946	0.7932	1.0264	0.8423
2315	4.63	4.75	38.1	sp|Q8IWZ8|SUGP1_HUMAN	SURP and G-patch domain-containing protein 1 OS=Homo sapiens GN=SUGP1 PE=1 SV=2	HUMAN	5	0.8949	1.2639	0.7446	0.8424
482	23.01	23.05	59.6	sp|Q14498|RBM39_HUMAN	RNA-binding protein 39 OS=Homo sapiens GN=RBM39 PE=1 SV=2	HUMAN	13	0.8949	0.8574	1.1418	0.8425
2906	2.86	3.13	56.2	sp|P00374|DYR_HUMAN	Dihydrofolate reductase OS=Homo sapiens GN=DHFR PE=1 SV=2	HUMAN	2	0.895	0.9064	0.9703	0.8426
2856	3.08	3.24	34.5	sp|Q96P11|NSUN5_HUMAN	Putative methyltransferase NSUN5 OS=Homo sapiens GN=NSUN5 PE=1 SV=2	HUMAN	2	0.8954	1.0448	0.9171	0.8426
3402	2.01	2.24	51.4	sp|O60888|CUTA_HUMAN	Protein CutA OS=Homo sapiens GN=CUTA PE=1 SV=2	HUMAN	1	0.8956	0.8918	1.2774	0.8429
4527	0.13	0.41	22.4	sp|Q8ND82|Z280C_HUMAN	Zinc finger protein 280C OS=Homo sapiens GN=ZNF280C PE=1 SV=1	HUMAN	0	0.896	1.9132	0.9124	0.843
3081	2.28	2.71	26.1	sp|Q9Y484|WIPI4_HUMAN	WD repeat domain phosphoinositide-interacting protein 4 OS=Homo sapiens GN=WDR45 PE=2 SV=1	HUMAN	1	0.896	0.5279	1.3173	0.8442
4838	0.06	0.29	28.3	RRRRRsp|Q15051|IQCB1_HUMAN	REVERSED IQ calmodulin-binding motif-containing protein 1 OS=Homo sapiens GN=IQCB1 PE=1 SV=1	HUMAN	0	0.8961	0.8378	0.9896	0.8443
3090	2.27	2.27	39.5	sp|Q9Y2V2|CHSP1_HUMAN	Calcium-regulated heat stable protein 1 OS=Homo sapiens GN=CARHSP1 PE=1 SV=2	HUMAN	3	0.8961	0.8592	0.7392	0.8444
2048	6	6.08	42.1	sp|Q9NWS0|PIHD1_HUMAN	PIH1 domain-containing protein 1 OS=Homo sapiens GN=PIH1D1 PE=1 SV=1	HUMAN	3	0.8963	1.2437	0.7412	0.8451
334	28.67	28.92	46.9	sp|Q15437|SC23B_HUMAN	Protein transport protein Sec23B OS=Homo sapiens GN=SEC23B PE=1 SV=2	HUMAN	24	0.8963	0.9167	0.9469	0.8453
1538	8.42	8.55	41.7	sp|Q9BZG1|RAB34_HUMAN	Ras-related protein Rab-34 OS=Homo sapiens GN=RAB34 PE=1 SV=1	HUMAN	6	0.8963	0.8741	0.8981	0.8454
3239	2.05	2.1	61.3	sp|Q8IXM3|RM41_HUMAN	39S ribosomal protein L41, mitochondrial OS=Homo sapiens GN=MRPL41 PE=1 SV=1	HUMAN	2	0.8968	1.139	0.8498	0.8464
2759	3.52	3.74	23.9	sp|Q9BZH6|WDR11_HUMAN	WD repeat-containing protein 11 OS=Homo sapiens GN=WDR11 PE=1 SV=1	HUMAN	3	0.8974	0.9637	0.7305	0.8467
1895	6.3	6.95	51.7	sp|Q8WVM0|TFB1M_HUMAN	Dimethyladenosine transferase 1, mitochondrial OS=Homo sapiens GN=TFB1M PE=1 SV=1	HUMAN	3	0.8974	1.0617	0.6729	0.8467
1478	8.9	9.89	32.2	sp|Q6L8Q7|PDE12_HUMAN	2',5'-phosphodiesterase 12 OS=Homo sapiens GN=PDE12 PE=1 SV=2	HUMAN	5	0.8975	0.8496	0.9906	0.8469
2608	4	4.11	26.1	sp|Q13131|AAPK1_HUMAN	5'-AMP-activated protein kinase catalytic subunit alpha-1 OS=Homo sapiens GN=PRKAA1 PE=1 SV=4	HUMAN	4	0.8977	1.0212	0.9016	0.8473
594	20.2	20.38	85.1	sp|O00299|CLIC1_HUMAN	Chloride intracellular channel protein 1 OS=Homo sapiens GN=CLIC1 PE=1 SV=4	HUMAN	21	0.8979	0.9817	0.7986	0.8476
1189	11.4	11.53	28.6	sp|Q7LBC6|KDM3B_HUMAN	Lysine-specific demethylase 3B OS=Homo sapiens GN=KDM3B PE=1 SV=2	HUMAN	8	0.898	0.9616	1.0658	0.8479
1781	6.99	7.21	41.1	sp|Q69YN2|C19L1_HUMAN	CWF19-like protein 1 OS=Homo sapiens GN=CWF19L1 PE=1 SV=2	HUMAN	5	0.898	1.2008	1.0214	0.8479
2592	4	4.26	21.6	sp|P49441|INPP_HUMAN	Inositol polyphosphate 1-phosphatase OS=Homo sapiens GN=INPP1 PE=1 SV=1	HUMAN	2	0.8982	1.0598	0.9329	0.848
4340	0.25	0.84	35.7	sp|Q9UM54|MYO6_HUMAN	Unconventional myosin-VI OS=Homo sapiens GN=MYO6 PE=1 SV=4	HUMAN	0	0.8982	1.2039	0.8214	0.8483
1504	8.67	9.2	25.7	sp|Q8WWI5|CTL1_HUMAN	Choline transporter-like protein 1 OS=Homo sapiens GN=SLC44A1 PE=1 SV=1	HUMAN	7	0.8982	0.9191	0.8827	0.8486
1274	10.52	10.64	64.6	sp|O60739|EIF1B_HUMAN	Eukaryotic translation initiation factor 1b OS=Homo sapiens GN=EIF1B PE=1 SV=2	HUMAN	9	0.8988	1.0293	0.7229	0.8487
2595	4	4.23	16.9	sp|Q99467|CD180_HUMAN	CD180 antigen OS=Homo sapiens GN=CD180 PE=1 SV=2	HUMAN	3	0.8988	0.9155	0.8311	0.8487
2943	2.7	3.3	30.3	sp|Q9NZ08|ERAP1_HUMAN	Endoplasmic reticulum aminopeptidase 1 OS=Homo sapiens GN=ERAP1 PE=1 SV=3	HUMAN	2	0.8991	0.7636	1.1736	0.8488
2020	6.01	6.32	27.5	sp|P54252|ATX3_HUMAN	Ataxin-3 OS=Homo sapiens GN=ATXN3 PE=1 SV=4	HUMAN	4	0.9005	1.0771	0.854	0.8488
1697	7.59	7.95	31.9	sp|A4D1P6|WDR91_HUMAN	WD repeat-containing protein 91 OS=Homo sapiens GN=WDR91 PE=1 SV=2	HUMAN	5	0.9005	1.1372	0.7591	0.8491
3263	2.03	3.1	35.4	sp|Q14CX7|NAA25_HUMAN	N-alpha-acetyltransferase 25, NatB auxiliary subunit OS=Homo sapiens GN=NAA25 PE=1 SV=1	HUMAN	2	0.9006	0.7029	1.1608	0.8495
2627	4	4.04	42.6	sp|Q9UBI1|COMD3_HUMAN	COMM domain-containing protein 3 OS=Homo sapiens GN=COMMD3 PE=1 SV=1	HUMAN	3	0.9006	1.1448	1.0104	0.8495
3832	1.66	2.07	25.9	sp|Q9P0J1|PDP1_HUMAN	[Pyruvate dehydrogenase [acetyl-transferring]]-phosphatase 1, mitochondrial OS=Homo sapiens GN=PDP1 PE=1 SV=3	HUMAN	1	0.9009	1.024	0.7571	0.8498
3854	1.56	1.8	17.8	sp|P30825|CTR1_HUMAN	High affinity cationic amino acid transporter 1 OS=Homo sapiens GN=SLC7A1 PE=1 SV=1	HUMAN	1	0.9013	0.9752	0.7128	0.8499
4454	0.17	0.17	10.9	sp|Q99735|MGST2_HUMAN	Microsomal glutathione S-transferase 2 OS=Homo sapiens GN=MGST2 PE=1 SV=1	HUMAN	0	0.9017	1.3511	0.5649	0.8502
3341	2.02	2.03	55.1	sp|Q9Y2Q9|RT28_HUMAN	28S ribosomal protein S28, mitochondrial OS=Homo sapiens GN=MRPS28 PE=1 SV=1	HUMAN	1	0.902	1.5534	1.1085	0.8502
3230	2.05	2.28	38.2	sp|O43824|GTPB6_HUMAN	Putative GTP-binding protein 6 OS=Homo sapiens GN=GTPBP6 PE=2 SV=3	HUMAN	1	0.9023	1.0865	0.8385	0.8504
3071	2.3	5.2	34.3	sp|Q9H501|ESF1_HUMAN	ESF1 homolog OS=Homo sapiens GN=ESF1 PE=1 SV=1	HUMAN	2	0.9027	1.117	0.7759	0.8508
3895	1.42	1.44	22.6	sp|Q9NUI1|DECR2_HUMAN	Peroxisomal 2,4-dienoyl-CoA reductase OS=Homo sapiens GN=DECR2 PE=1 SV=1	HUMAN	3	0.903	0.7941	1.0748	0.8511
1184	11.44	11.56	55.1	sp|Q92905|CSN5_HUMAN	COP9 signalosome complex subunit 5 OS=Homo sapiens GN=COPS5 PE=1 SV=4	HUMAN	7	0.9031	0.9888	0.846	0.8512
1753	7.2	8.49	43.4	sp|P30533|AMRP_HUMAN	Alpha-2-macroglobulin receptor-associated protein OS=Homo sapiens GN=LRPAP1 PE=1 SV=1	HUMAN	5	0.9032	0.9337	0.8965	0.8512
4143	0.58	0.73	31	sp|Q9UIA0|CYH4_HUMAN	Cytohesin-4 OS=Homo sapiens GN=CYTH4 PE=1 SV=1	HUMAN	1	0.9034	1.0253	0.6701	0.8514
2016	6.01	7.44	37.8	sp|Q7L1W4|LRC8D_HUMAN	Leucine-rich repeat-containing protein 8D OS=Homo sapiens GN=LRRC8D PE=1 SV=1	HUMAN	4	0.9035	0.9016	1.3847	0.8518
407	25.67	27.12	78	sp|O15144|ARPC2_HUMAN	Actin-related protein 2/3 complex subunit 2 OS=Homo sapiens GN=ARPC2 PE=1 SV=1	HUMAN	22	0.9036	0.9207	0.9747	0.8523
1323	10.12	10.2	43.7	sp|Q01085|TIAR_HUMAN	Nucleolysin TIAR OS=Homo sapiens GN=TIAL1 PE=1 SV=1	HUMAN	5	0.9038	0.9311	0.9285	0.8526
2545	4.01	4.32	26.3	sp|P78332|RBM6_HUMAN	RNA-binding protein 6 OS=Homo sapiens GN=RBM6 PE=1 SV=5	HUMAN	3	0.9039	0.9189	0.9338	0.8529
2154	5.45	5.95	24.3	sp|Q9HD45|TM9S3_HUMAN	Transmembrane 9 superfamily member 3 OS=Homo sapiens GN=TM9SF3 PE=1 SV=2	HUMAN	4	0.9041	0.9814	0.8967	0.8534
4669	0.09	0.24	29.6	sp|Q8NDT2|RB15B_HUMAN	Putative RNA-binding protein 15B OS=Homo sapiens GN=RBM15B PE=1 SV=3	HUMAN	1	0.9043	0.8072	0.8745	0.8539
1774	7.03	7.44	24.6	sp|Q63HN8|RN213_HUMAN	E3 ubiquitin-protein ligase RNF213 OS=Homo sapiens GN=RNF213 PE=1 SV=3	HUMAN	6	0.9049	1.0179	1.0127	0.8542
1216	11.12	11.94	49.2	sp|Q53GS9|SNUT2_HUMAN	U4/U6.U5 tri-snRNP-associated protein 2 OS=Homo sapiens GN=USP39 PE=1 SV=2	HUMAN	8	0.9049	0.9764	0.9482	0.8543
2170	5.37	5.45	34.6	sp|Q8TED0|UTP15_HUMAN	U3 small nucleolar RNA-associated protein 15 homolog OS=Homo sapiens GN=UTP15 PE=1 SV=3	HUMAN	4	0.905	0.8773	0.8899	0.8547
2411	4.18	4.75	21.5	sp|Q5VZL5|ZMYM4_HUMAN	Zinc finger MYM-type protein 4 OS=Homo sapiens GN=ZMYM4 PE=1 SV=1	HUMAN	2	0.9053	0.945	0.8881	0.855
2991	2.52	2.61	35.1	sp|O75688|PPM1B_HUMAN	Protein phosphatase 1B OS=Homo sapiens GN=PPM1B PE=1 SV=1	HUMAN	2	0.9058	0.9467	0.9533	0.8551
3965	1.11	3.37	27.7	sp|P55212|CASP6_HUMAN	Caspase-6 OS=Homo sapiens GN=CASP6 PE=1 SV=2	HUMAN	2	0.906	1.3144	0.8393	0.8554
3931	1.27	1.71	16.4	sp|Q96HR8|NAF1_HUMAN	H/ACA ribonucleoprotein complex non-core subunit NAF1 OS=Homo sapiens GN=NAF1 PE=1 SV=2	HUMAN	2	0.9062	0.9368	0.926	0.8555
3476	2	2.8	12.7	sp|Q86U70|LDB1_HUMAN	LIM domain-binding protein 1 OS=Homo sapiens GN=LDB1 PE=1 SV=2	HUMAN	2	0.9071	0.6221	1.4224	0.8558
3296	2.02	4.38	31.7	sp|Q9H7B2|RPF2_HUMAN	Ribosome production factor 2 homolog OS=Homo sapiens GN=RPF2 PE=1 SV=2	HUMAN	2	0.9072	0.7006	1.2735	0.8559
4764	0.07	0.24	52.1	RRRRRsp|P05783|K1C18_HUMAN	REVERSED Keratin, type I cytoskeletal 18 OS=Homo sapiens GN=KRT18 PE=1 SV=2	HUMAN	0	0.9073	1.0393	1.0059	0.856
1840	6.63	7.26	31.8	sp|Q9ULU4|PKCB1_HUMAN	Protein kinase C-binding protein 1 OS=Homo sapiens GN=ZMYND8 PE=1 SV=2	HUMAN	4	0.9074	1.0094	0.9687	0.8563
431	24.83	24.89	84.5	sp|P33316|DUT_HUMAN	Deoxyuridine 5'-triphosphate nucleotidohydrolase, mitochondrial OS=Homo sapiens GN=DUT PE=1 SV=4	HUMAN	29	0.9082	0.8804	0.954	0.8565
2811	3.26	3.26	67.9	sp|P62273|RS29_HUMAN	40S ribosomal protein S29 OS=Homo sapiens GN=RPS29 PE=1 SV=2	HUMAN	3	0.9083	0.9211	0.8546	0.8566
1936	6.15	6.36	18.6	sp|Q7Z4G4|TRM11_HUMAN	tRNA (guanine(10)-N2)-methyltransferase homolog OS=Homo sapiens GN=TRMT11 PE=1 SV=1	HUMAN	3	0.9086	0.9177	0.9043	0.8567
875	15.16	15.79	47.8	sp|P36551|HEM6_HUMAN	Coproporphyrinogen-III oxidase, mitochondrial OS=Homo sapiens GN=CPOX PE=1 SV=3	HUMAN	10	0.909	0.9208	1.0331	0.8569
2914	2.83	2.92	34.6	sp|Q86UY6|NAA40_HUMAN	N-alpha-acetyltransferase 40 OS=Homo sapiens GN=NAA40 PE=2 SV=1	HUMAN	2	0.909	0.7504	0.67	0.857
2304	4.7	4.84	61.6	sp|O95721|SNP29_HUMAN	Synaptosomal-associated protein 29 OS=Homo sapiens GN=SNAP29 PE=1 SV=1	HUMAN	4	0.9091	0.9966	0.8127	0.8571
1851	6.54	6.58	43.4	sp|Q9NR31|SAR1A_HUMAN	GTP-binding protein SAR1a OS=Homo sapiens GN=SAR1A PE=1 SV=1	HUMAN	7	0.9092	0.94	0.8898	0.8571
1625	8	8.73	34.2	sp|P49770|EI2BB_HUMAN	Translation initiation factor eIF-2B subunit beta OS=Homo sapiens GN=EIF2B2 PE=1 SV=3	HUMAN	4	0.9095	1.0573	1.0192	0.8577
3533	2	2.25	24	sp|Q9NNW5|WDR6_HUMAN	WD repeat-containing protein 6 OS=Homo sapiens GN=WDR6 PE=1 SV=1	HUMAN	1	0.9097	3.4828	0.8865	0.8583
2242	4.99	5.08	69.4	sp|Q9Y5M8|SRPRB_HUMAN	Signal recognition particle receptor subunit beta OS=Homo sapiens GN=SRPRB PE=1 SV=3	HUMAN	4	0.9097	0.9272	1.0255	0.8585
2747	3.56	3.63	29	sp|P22415|USF1_HUMAN	Upstream stimulatory factor 1 OS=Homo sapiens GN=USF1 PE=1 SV=1	HUMAN	2	0.9098	0.9337	0.7609	0.8586
1793	6.93	7.13	25.5	sp|Q96AY4|TTC28_HUMAN	Tetratricopeptide repeat protein 28 OS=Homo sapiens GN=TTC28 PE=1 SV=4	HUMAN	4	0.9104	0.7403	1.0194	0.8598
1803	6.89	8.94	54.9	sp|Q8WW22|DNJA4_HUMAN	DnaJ homolog subfamily A member 4 OS=Homo sapiens GN=DNAJA4 PE=1 SV=1	HUMAN	5	0.9106	0.8532	1.0466	0.8602
1237	10.82	11.45	36.4	sp|Q9Y2U8|MAN1_HUMAN	Inner nuclear membrane protein Man1 OS=Homo sapiens GN=LEMD3 PE=1 SV=2	HUMAN	7	0.9108	0.8175	1.1892	0.8602
1672	7.77	8.03	36.7	sp|Q96BY6|DOC10_HUMAN	Dedicator of cytokinesis protein 10 OS=Homo sapiens GN=DOCK10 PE=1 SV=3	HUMAN	4	0.9109	1.0292	0.8011	0.8614
3404	2.01	2.21	35.1	sp|Q9BW91|NUDT9_HUMAN	ADP-ribose pyrophosphatase, mitochondrial OS=Homo sapiens GN=NUDT9 PE=1 SV=1	HUMAN	1	0.9109	0.8641	0.9911	0.8617
2598	4	4.16	44.2	sp|Q13542|4EBP2_HUMAN	Eukaryotic translation initiation factor 4E-binding protein 2 OS=Homo sapiens GN=EIF4EBP2 PE=1 SV=1	HUMAN	3	0.9111	0.7193	0.8994	0.8625
2232	5.04	5.08	75.9	sp|Q15369|ELOC_HUMAN	Transcription elongation factor B polypeptide 1 OS=Homo sapiens GN=TCEB1 PE=1 SV=1	HUMAN	7	0.9113	0.8582	0.9074	0.8628
2775	3.44	3.51	27.6	sp|P15104|GLNA_HUMAN	Glutamine synthetase OS=Homo sapiens GN=GLUL PE=1 SV=4	HUMAN	2	0.9114	1.0659	1.2599	0.8628
1826	6.7	7	46.3	sp|Q12979|ABR_HUMAN	Active breakpoint cluster region-related protein OS=Homo sapiens GN=ABR PE=2 SV=2	HUMAN	5	0.9117	0.9874	1.1171	0.8639
3938	1.25	1.41	27.9	sp|Q96EY9|ADAT3_HUMAN	tRNA-specific adenosine deaminase-like protein 3 OS=Homo sapiens GN=ADAT3 PE=1 SV=1	HUMAN	1	0.9119	0.8701	1.3938	0.864
2576	4	5.52	34.1	sp|Q8TAG9|EXOC6_HUMAN	Exocyst complex component 6 OS=Homo sapiens GN=EXOC6 PE=1 SV=3	HUMAN	2	0.9121	0.7342	1.0132	0.8643
1795	6.92	8.36	26.9	sp|Q15022|SUZ12_HUMAN	Polycomb protein SUZ12 OS=Homo sapiens GN=SUZ12 PE=1 SV=3	HUMAN	7	0.9123	0.9048	0.8933	0.8645
1227	10.92	11.06	53.6	sp|O14579|COPE_HUMAN	Coatomer subunit epsilon OS=Homo sapiens GN=COPE PE=1 SV=3	HUMAN	7	0.9123	0.8734	0.9539	0.8647
4280	0.33	0.38	7.8	sp|Q9C0B0|UNK_HUMAN	RING finger protein unkempt homolog OS=Homo sapiens GN=UNK PE=1 SV=2	HUMAN	1	0.9123	0.9714	0.2754	0.865
1867	6.45	6.82	30.6	sp|Q5SW79|CE170_HUMAN	Centrosomal protein of 170 kDa OS=Homo sapiens GN=CEP170 PE=1 SV=1	HUMAN	4	0.9123	1.159	0.7757	0.8654
865	15.26	26.92	57.7	sp|P11216|PYGB_HUMAN	Glycogen phosphorylase, brain form OS=Homo sapiens GN=PYGB PE=1 SV=5	HUMAN	16	0.9127	0.8529	0.9586	0.8655
2870	3.03	3.29	31.2	sp|Q9NRF8|PYRG2_HUMAN	CTP synthase 2 OS=Homo sapiens GN=CTPS2 PE=1 SV=1	HUMAN	3	0.9127	0.7576	1.302	0.8656
2833	3.16	3.18	13.9	sp|Q8WTS6|SETD7_HUMAN	Histone-lysine N-methyltransferase SETD7 OS=Homo sapiens GN=SETD7 PE=1 SV=1	HUMAN	2	0.9128	0.8332	1.0049	0.8658
1500	8.71	10.78	81.2	sp|P60981|DEST_HUMAN	Destrin OS=Homo sapiens GN=DSTN PE=1 SV=3	HUMAN	10	0.9133	0.9212	0.8856	0.866
2784	3.39	3.5	36.9	sp|Q9NRN7|ADPPT_HUMAN	L-aminoadipate-semialdehyde dehydrogenase-phosphopantetheinyl transferase OS=Homo sapiens GN=AASDHPPT PE=1 SV=2	HUMAN	2	0.9142	1.0425	0.8175	0.8661
4485	0.15	0.19	8.1	sp|Q6ZVK8|NUD18_HUMAN	Nucleoside diphosphate-linked moiety X motif 18 OS=Homo sapiens GN=NUDT18 PE=1 SV=2	HUMAN	0	0.9143	1.6848	0.8399	0.8661
2026	6.01	6.06	39.9	sp|P20933|ASPG_HUMAN	N(4)-(beta-N-acetylglucosaminyl)-L-asparaginase OS=Homo sapiens GN=AGA PE=1 SV=2	HUMAN	3	0.9144	1.0055	0.8095	0.8663
1566	8.26	9.22	30.9	sp|Q969V3|NCLN_HUMAN	Nicalin OS=Homo sapiens GN=NCLN PE=1 SV=2	HUMAN	6	0.9144	0.8859	0.94	0.8664
4135	0.61	0.72	24.7	sp|Q9H0V9|LMA2L_HUMAN	VIP36-like protein OS=Homo sapiens GN=LMAN2L PE=1 SV=1	HUMAN	2	0.9145	1.1325	0.5103	0.8666
2234	5.02	5.54	27.7	sp|Q8N573|OXR1_HUMAN	Oxidation resistance protein 1 OS=Homo sapiens GN=OXR1 PE=1 SV=2	HUMAN	3	0.9147	0.9596	0.9221	0.8666
740	17.35	17.97	88.3	sp|Q9BV57|MTND_HUMAN	1,2-dihydroxy-3-keto-5-methylthiopentene dioxygenase OS=Homo sapiens GN=ADI1 PE=1 SV=1	HUMAN	13	0.9147	0.923	0.778	0.8667
4319	0.28	0.54	38.7	sp|Q9NW08|RPC2_HUMAN	DNA-directed RNA polymerase III subunit RPC2 OS=Homo sapiens GN=POLR3B PE=1 SV=2	HUMAN	1	0.9148	1.1828	0.625	0.8668
3045	2.37	2.51	22.5	sp|Q9NRA8|4ET_HUMAN	Eukaryotic translation initiation factor 4E transporter OS=Homo sapiens GN=EIF4ENIF1 PE=1 SV=2	HUMAN	2	0.9149	1.0616	1.2045	0.867
1938	6.14	8.01	39.3	sp|Q8N1B4|VPS52_HUMAN	Vacuolar protein sorting-associated protein 52 homolog OS=Homo sapiens GN=VPS52 PE=1 SV=1	HUMAN	4	0.9151	1.2387	0.891	0.8674
1152	11.92	12.26	34.3	sp|P35237|SPB6_HUMAN	Serpin B6 OS=Homo sapiens GN=SERPINB6 PE=1 SV=3	HUMAN	9	0.9153	0.9725	0.9867	0.8678
3633	2	2.05	36.8	sp|Q9UKM7|MA1B1_HUMAN	Endoplasmic reticulum mannosyl-oligosaccharide 1,2-alpha-mannosidase OS=Homo sapiens GN=MAN1B1 PE=1 SV=2	HUMAN	1	0.9159	1.0355	0.7482	0.8679
2769	3.46	3.7	34.6	sp|Q13206|DDX10_HUMAN	Probable ATP-dependent RNA helicase DDX10 OS=Homo sapiens GN=DDX10 PE=1 SV=2	HUMAN	3	0.9161	1.2579	0.9077	0.8682
1340	10.03	11.02	29.7	sp|O60231|DHX16_HUMAN	Putative pre-mRNA-splicing factor ATP-dependent RNA helicase DHX16 OS=Homo sapiens GN=DHX16 PE=1 SV=2	HUMAN	6	0.9161	1.1786	0.8897	0.8686
3396	2.01	2.25	58.8	sp|P29084|T2EB_HUMAN	Transcription initiation factor IIE subunit beta OS=Homo sapiens GN=GTF2E2 PE=1 SV=1	HUMAN	1	0.9162	0.8621	0.7174	0.8687
4026	0.91	0.93	35.3	sp|P10109|ADX_HUMAN	Adrenodoxin, mitochondrial OS=Homo sapiens GN=FDX1 PE=1 SV=1	HUMAN	1	0.9163	1.2079	0.7223	0.8693
3670	2	2.03	22.9	sp|Q9BRX9|WDR83_HUMAN	WD repeat domain-containing protein 83 OS=Homo sapiens GN=WDR83 PE=1 SV=1	HUMAN	1	0.9168	0.9054	1.4512	0.8695
2767	3.48	3.52	19	sp|P51617|IRAK1_HUMAN	Interleukin-1 receptor-associated kinase 1 OS=Homo sapiens GN=IRAK1 PE=1 SV=2	HUMAN	2	0.9168	1.6691	0.9339	0.8697
116	52.64	55	62	sp|Q00341|VIGLN_HUMAN	Vigilin OS=Homo sapiens GN=HDLBP PE=1 SV=2	HUMAN	36	0.9168	0.8832	0.8793	0.8699
1970	6.07	6.09	26.5	sp|P16150|LEUK_HUMAN	Leukosialin OS=Homo sapiens GN=SPN PE=1 SV=1	HUMAN	7	0.9171	0.8588	0.8876	0.8702
3548	2	2.21	42.6	sp|Q8N2F6|ARM10_HUMAN	Armadillo repeat-containing protein 10 OS=Homo sapiens GN=ARMC10 PE=1 SV=1	HUMAN	1	0.9177	1.6403	1.1682	0.8705
389	26.29	27.5	44.5	sp|P42224|STAT1_HUMAN	Signal transducer and activator of transcription 1-alpha/beta OS=Homo sapiens GN=STAT1 PE=1 SV=2	HUMAN	15	0.9178	0.8977	1.0261	0.8707
2736	3.62	3.64	11.3	sp|Q15654|TRIP6_HUMAN	Thyroid receptor-interacting protein 6 OS=Homo sapiens GN=TRIP6 PE=1 SV=3	HUMAN	2	0.9181	1.4456	0.9944	0.8707
3596	2	2.1	19.7	sp|Q9H8H3|MET7A_HUMAN	Methyltransferase-like protein 7A OS=Homo sapiens GN=METTL7A PE=1 SV=1	HUMAN	1	0.9184	0.9235	0.9504	0.871
3484	2	2.54	11.7	sp|Q5PRF9|SMAG2_HUMAN	Protein Smaug homolog 2 OS=Homo sapiens GN=SAMD4B PE=1 SV=1	HUMAN	1	0.9188	0.9332	1.1608	0.8714
1850	6.54	10.34	37.4	sp|Q13136|LIPA1_HUMAN	Liprin-alpha-1 OS=Homo sapiens GN=PPFIA1 PE=1 SV=1	HUMAN	5	0.9191	0.9039	0.8666	0.8717
2463	4.08	4.21	32.7	sp|P04062|GLCM_HUMAN	Glucosylceramidase OS=Homo sapiens GN=GBA PE=1 SV=3	HUMAN	3	0.9193	1.855	0.6249	0.8721
1907	6.25	7.45	44.6	sp|Q86VP1|TAXB1_HUMAN	Tax1-binding protein 1 OS=Homo sapiens GN=TAX1BP1 PE=1 SV=2	HUMAN	4	0.9195	0.8713	0.8718	0.8723
630	19.39	20.01	35.4	sp|P55196|AFAD_HUMAN	Afadin OS=Homo sapiens GN=MLLT4 PE=1 SV=3	HUMAN	12	0.9203	0.8752	1.0466	0.8724
873	15.17	15.2	54.8	sp|Q13347|EIF3I_HUMAN	Eukaryotic translation initiation factor 3 subunit I OS=Homo sapiens GN=EIF3I PE=1 SV=1	HUMAN	12	0.9204	0.8761	0.9091	0.8728
3137	2.17	2.26	30.4	sp|P13051|UNG_HUMAN	Uracil-DNA glycosylase OS=Homo sapiens GN=UNG PE=1 SV=2	HUMAN	2	0.9208	0.9874	0.8505	0.8732
4080	0.76	0.78	28.6	sp|Q9BWN1|PRR14_HUMAN	Proline-rich protein 14 OS=Homo sapiens GN=PRR14 PE=1 SV=1	HUMAN	1	0.9209	1.6969	0.8051	0.8732
3022	2.43	2.69	34.9	sp|Q66K14|TBC9B_HUMAN	TBC1 domain family member 9B OS=Homo sapiens GN=TBC1D9B PE=1 SV=3	HUMAN	1	0.921	1.0336	0.8488	0.8734
2921	2.81	2.88	26.7	sp|Q9Y4P1|ATG4B_HUMAN	Cysteine protease ATG4B OS=Homo sapiens GN=ATG4B PE=1 SV=2	HUMAN	2	0.9211	1.0593	0.9464	0.8737
4068	0.79	0.93	56.7	sp|Q9NV35|NUD15_HUMAN	Probable 8-oxo-dGTP diphosphatase NUDT15 OS=Homo sapiens GN=NUDT15 PE=1 SV=1	HUMAN	1	0.9216	1.4338	0.7311	0.8737
1855	6.5	9.65	33.4	sp|P52732|KIF11_HUMAN	Kinesin-like protein KIF11 OS=Homo sapiens GN=KIF11 PE=1 SV=2	HUMAN	5	0.9217	0.8958	0.9307	0.8739
3374	2.01	2.37	34.8	sp|P54277|PMS1_HUMAN	PMS1 protein homolog 1 OS=Homo sapiens GN=PMS1 PE=1 SV=1	HUMAN	1	0.922	0.6012	0.8893	0.8741
684	18.25	19.34	26.6	sp|O43847|NRDC_HUMAN	Nardilysin OS=Homo sapiens GN=NRD1 PE=1 SV=2	HUMAN	14	0.9223	0.8935	0.8926	0.8741
1703	7.57	7.71	45	sp|Q13155|AIMP2_HUMAN	Aminoacyl tRNA synthase complex-interacting multifunctional protein 2 OS=Homo sapiens GN=AIMP2 PE=1 SV=2	HUMAN	12	0.9224	0.9385	0.8614	0.8741
[truncated: 4,325 more rows]
